# Supplementary material
Source: Research Square preprint supplement (doi:10.21203/rs.3.rs-9788709/v1)
Supplement: Supplementary file 1 [file 1f87b1d3b342f862788286b0.xlsx]

## Sheet: README
	Article title:
	Biophysical dissection of high-signal phenotypes in AI-guided evolution of leucine-rich repeat binders
	Journal:
	The Protein Journal
	Authors:
	Junjae Park, Saehae Choi, Eun Yi Jeon, Hyeonjeong Yu, Cho Hyun Kim, Jieun Lee, Soyoung An, Myungho Sohn, Won-Kyu Lee
	Corresponding author:
	Won-Kyu Lee, New Drug Development Center, Osong Medical Innovation Foundation, Cheongju 28160, Republic of Korea
	E-mail: gregorio7@korea.kr
	Online Resource 6. Apparent BLI kinetic parameters and fit statistics for VLR WT and A6C	Online Resource 6. Apparent BLI kinetic parameters and fit statistics for VLR WT and A6C	Online Resource 6. Apparent BLI kinetic parameters and fit statistics for VLR WT and A6C	Online Resource 6. Apparent BLI kinetic parameters and fit statistics for VLR WT and A6C	Online Resource 6. Apparent BLI kinetic parameters and fit statistics for VLR WT and A6C	Online Resource 6. Apparent BLI kinetic parameters and fit statistics for VLR WT and A6C	Online Resource 6. Apparent BLI kinetic parameters and fit statistics for VLR WT and A6C
	Kinetic values are reported as apparent parameters under the tested Ni-NTA immobilization geometry.	Kinetic values are reported as apparent parameters under the tested Ni-NTA immobilization geometry.	Kinetic values are reported as apparent parameters under the tested Ni-NTA immobilization geometry.	Kinetic values are reported as apparent parameters under the tested Ni-NTA immobilization geometry.	Kinetic values are reported as apparent parameters under the tested Ni-NTA immobilization geometry.	Kinetic values are reported as apparent parameters under the tested Ni-NTA immobilization geometry.	Kinetic values are reported as apparent parameters under the tested Ni-NTA immobilization geometry.

## Sheet: Sheet1
Online Resource 6. Apparent BLI kinetic parameters and fit statistics for VLR WT and A6C	Online Resource 6. Apparent BLI kinetic parameters and fit statistics for VLR WT and A6C	Online Resource 6. Apparent BLI kinetic parameters and fit statistics for VLR WT and A6C	Online Resource 6. Apparent BLI kinetic parameters and fit statistics for VLR WT and A6C	Online Resource 6. Apparent BLI kinetic parameters and fit statistics for VLR WT and A6C	Online Resource 6. Apparent BLI kinetic parameters and fit statistics for VLR WT and A6C	Online Resource 6. Apparent BLI kinetic parameters and fit statistics for VLR WT and A6C
Kinetic values are reported as apparent parameters under the tested Ni-NTA immobilization geometry.	Kinetic values are reported as apparent parameters under the tested Ni-NTA immobilization geometry.	Kinetic values are reported as apparent parameters under the tested Ni-NTA immobilization geometry.	Kinetic values are reported as apparent parameters under the tested Ni-NTA immobilization geometry.	Kinetic values are reported as apparent parameters under the tested Ni-NTA immobilization geometry.	Kinetic values are reported as apparent parameters under the tested Ni-NTA immobilization geometry.	Kinetic values are reported as apparent parameters under the tested Ni-NTA immobilization geometry.
Sample	apparent KD (M)	apparent KD (nM)	apparent kon (M^-1 s^-1)	apparent koff (s^-1)	chi-square	R^2
VLR WT	3.127E-8	31.27	1.303E6	4.076E-2	0.1012	0.99
VLR A6C	6.961E-8	69.61	8.735E5	6.080E-2	0.0936	0.9813
BLI assay conditions	BLI assay conditions	BLI assay conditions	BLI assay conditions	BLI assay conditions	BLI assay conditions	BLI assay conditions
Instrument	Octet QK384
Biosensor	Ni-NTA
Running buffer	HBS-EP+
Ligand	His-tagged VLR WT or A6C, 5 µg/mL
Analyte	HEWL, five-point twofold dilution series from 78.1 nM to 4.88 nM
Monitoring	Association 100 s; dissociation 60 s
Fit model	1:1 binding model; values interpreted as apparent parameters
