# Supplementary material
Source: Research Square preprint supplement (doi:10.21203/rs.3.rs-9788709/v1)
Supplement: Supplementary file 2 [file 39cff6a40d9675c19c7eb83d.xlsx]

## Sheet: README
	Article title:
	Biophysical dissection of high-signal phenotypes in AI-guided evolution of leucine-rich repeat binders
	Journal:
	The Protein Journal
	Authors:
	Junjae Park, Saehae Choi, Eun Yi Jeon, Hyeonjeong Yu, Cho Hyun Kim, Jieun Lee, Soyoung An, Myungho Sohn, Won-Kyu Lee
	Corresponding author:
	Won-Kyu Lee, New Drug Development Center, Osong Medical Innovation Foundation, Cheongju 28160, Republic of Korea
	E-mail: gregorio7@korea.kr
	This Excel file contains filtered AiCE output entries for the repebody scaffold, including mutation pairs, confidence flags, mean pairwise scores, and log-transformed mean pairwise scores.

## Sheet: AiCE_outputs_repebody
Mutation_Pair	Flag	Mean_Pairwise_Score	Log_Mean_Pairwise_Score
T18V,A45A	1	2.7883	1.0254
N131N,Q179N	1	2.325	0.8437
K152N,R200N	1	1.8086	0.5926
N155N,Q179N	1	1.7623	0.5666
K104N,N131N	1	1.6799	0.5187
K128N,K176N	1	1.6749	0.5158
K152N,K176N	1	1.6143	0.4789
N83N,Q179N	1	1.5432	0.4339
K176N,R200N	1	1.5373	0.43
K109T,T157T	1	1.5199	0.4186
N83N,K104N	1	1.5128	0.414
N107N,Q179N	1	1.5069	0.4101
K128N,K152N	1	1.4818	0.3933
V112N,D160D	1	1.4302	0.3578
K128N,R200N	1	1.4006	0.3369
K104N,Q179N	1	1.3992	0.3359
K152N,N155N	1	1.3637	0.3102
N155N,R200N	1	1.333	0.2874
Y86T,Y134T	1	1.3216	0.2789
N131N,K152N	1	1.3098	0.2699
N155N,K176N	1	1.2833	0.2494
K104N,N155N	1	1.2467	0.2205
K104N,N107N	1	1.2465	0.2203
K152N,Q179N	1	1.2402	0.2153
Y86T,E110T	1	1.24	0.2152
L94I,W214W	1	1.2357	0.2117
N131N,K176N	1	1.2028	0.1847
Q179N,R200N	1	1.2025	0.1844
K104N,K152N	1	1.2013	0.1834
N131N,R200N	1	1.2006	0.1828
K128N,N155N	1	1.1731	0.1596
K104N,K128N	1	1.1385	0.1297
L94I,C248C	1	1.1336	0.1254
L94I,C216C	1	1.1336	0.1254
L94I,W227W	1	1.1319	0.1239
E110T,R158T	1	1.1302	0.1224
K104N,K176N	1	1.1282	0.1206
K128N,N131N	1	1.1273	0.1199
R63T,K109T	1	1.126	0.1187
N107N,K152N	1	1.1243	0.1171
K176N,Q179N	1	1.1206	0.1139
T18V,I43L	1	1.1034	0.0984
H231N,L234I	1	1.0923	0.0883
E110T,Y134T	1	1.0904	0.0865
E115S,N163N	1	1.0871	0.0835
Y64T,E110T	1	1.0845	0.0811
K104N,R200N	1	1.0752	0.0725
L94I,C218C	1	1.0752	0.0725
L94I,C268C	1	1.0751	0.0724
N83N,K152N	1	1.0653	0.0633
N83N,K128N	1	1.0616	0.0598
L94I,F150F	1	1.0527	0.0513
L94I,F102F	1	1.0527	0.0513
F10F,L94I	1	1.0527	0.0513
L94I,F174F	1	1.0527	0.0513
K71Q,Q93Q	1	1.0491	0.0479
L94I,N212N	1	1.049	0.0479
L94I,N116N	1	1.049	0.0479
L94I,N140N	1	1.049	0.0479
N92N,L94I	1	1.049	0.0479
L94I,N188N	1	1.049	0.0479
L94I,F198F	1	1.0456	0.0446
L94I,F126F	1	1.0456	0.0446
H139N,D187N	1	1.043	0.0421
N70N,L94I	1	1.0418	0.041
K128N,Q179N	1	1.0395	0.0387
N107N,K176N	1	1.037	0.0363
L94I,N164N	1	1.0348	0.0342
N107N,R200N	1	1.0281	0.0277
N83N,K176N	1	1.0271	0.0268
V53I,W214W	1	1.0227	0.0224
D127A,D151A	1	1.0201	0.0199
L94I,P213P	1	1.0194	0.0192
L94I,P170P	1	1.0194	0.0192
L94I,P146P	1	1.0194	0.0192
P5P,L94I	1	1.0194	0.0192
L94I,P122P	1	1.0194	0.0192
D12D,L94I	1	1.0184	0.0182
I50I,L94I	1	1.0164	0.0163
N61N,L94I	1	1.0153	0.0152
E80N,K104N	1	1.0111	0.0111
I56I,L94I	1	1.0094	0.0093
P11P,L94I	1	1.0054	0.0054
L94I,P194P	1	1.0053	0.0052
L145L,V193L	1	0.9871	-0.013
L94I,P254P	1	0.9859	-0.0142
F15F,L94I	1	0.9833	-0.0169
D103A,D151A	1	0.9826	-0.0176
V53I,W227W	1	0.9809	-0.0193
H139N,N163N	1	0.9774	-0.0228
Q119T,Q143T	1	0.9759	-0.0244
D103A,D127A	1	0.9705	-0.0299
V101I,V149V	1	0.9701	-0.0303
G55G,L94I	1	0.9688	-0.0317
V101I,V197V	1	0.9669	-0.0337
N83N,R200N	1	0.9639	-0.0368
N22T,W214W	1	0.9603	-0.0405
N107N,K128N	1	0.9591	-0.0417
D41T,W214W	1	0.9589	-0.042
H139N,N211N	1	0.9574	-0.0435
I43L,A45A	1	0.9402	-0.0617
V62L,W214W	1	0.94	-0.0619
K71Q,Q117Q	1	0.9383	-0.0637
V53I,C248C	1	0.9381	-0.0639
V53I,C216C	1	0.9381	-0.0639
L94I,Y223Y	1	0.9378	-0.0642
L94I,L135L	1	0.9358	-0.0663
L94I,L142L	1	0.9358	-0.0663
L84L,L94I	1	0.9358	-0.0663
L87L,L94I	1	0.9358	-0.0663
L89L,L94I	1	0.9358	-0.0663
L94I,L201L	1	0.9358	-0.0663
L94I,L105L	1	0.9358	-0.0663
L94I,L190L	1	0.9358	-0.0663
L94I,L108L	1	0.9358	-0.0663
L94I,L185L	1	0.9358	-0.0663
L94I,L177L	1	0.9358	-0.0663
L94I,L166L	1	0.9358	-0.0663
L94I,L161L	1	0.9358	-0.0663
L94I,L156L	1	0.9358	-0.0663
L94I,L209L	1	0.9358	-0.0663
L94I,T263T	1	0.9319	-0.0705
D160D,D162S	1	0.9317	-0.0707
L94I,L129L	1	0.9286	-0.0741
L23L,L94I	1	0.9286	-0.074
L94I,L153L	1	0.9286	-0.074
L94I,L159L	1	0.9286	-0.0741
L94I,L111L	1	0.9286	-0.0741
L94I,L180L	1	0.9286	-0.0741
L94I,L183L	1	0.9286	-0.0741
L94I,L204L	1	0.9286	-0.0741
L81L,L94I	1	0.9286	-0.0741
L94I,L132L	1	0.9286	-0.0741
L94I,L137L	1	0.9286	-0.074
L94I,G237G	1	0.9285	-0.0742
L94I,L113L	1	0.9285	-0.0741
Y64T,Y86T	1	0.9269	-0.076
P60P,L94I	1	0.9245	-0.0785
L94I,L118L	1	0.9217	-0.0816
L37L,L94I	1	0.9216	-0.0817
L65L,L94I	1	0.9215	-0.0817
L94I,A246A	1	0.9146	-0.0892
D244N,R256R	1	0.9139	-0.09
N22T,W227W	1	0.9124	-0.0917
D41T,W227W	1	0.9102	-0.0941
L94I,V258V	1	0.9101	-0.0942
L94I,P243P	1	0.909	-0.0954
V193L,W214W	1	0.9087	-0.0957
L94I,P232P	1	0.9041	-0.1008
I9I,L94I	1	0.8927	-0.1135
L94I,I228I	1	0.8927	-0.1135
H73T,W214W	1	0.8871	-0.1198
W214W,N240G	1	0.8838	-0.1235
L67L,L94I	1	0.8834	-0.124
S27S,L94I	1	0.8815	-0.1261
N22T,C216C	1	0.8809	-0.1268
N22T,C248C	1	0.8809	-0.1268
D41T,C248C	1	0.8796	-0.1283
D41T,C216C	1	0.8796	-0.1283
H73T,Q119T	1	0.8793	-0.1287
V53I,C218C	1	0.8748	-0.1337
V53I,C268C	1	0.8747	-0.1339
L94I,I221I	1	0.8743	-0.1343
S52S,L94I	1	0.8716	-0.1374
E115S,D187N	1	0.8716	-0.1374
V53I,F150F	1	0.8712	-0.1379
V53I,F174F	1	0.8712	-0.1379
V53I,F102F	1	0.8712	-0.1379
F10F,V53I	1	0.8712	-0.1379
V62L,W227W	1	0.871	-0.1381
V53I,N212N	1	0.8681	-0.1414
V53I,N92N	1	0.8681	-0.1414
V53I,N116N	1	0.8681	-0.1414
V53I,N140N	1	0.8681	-0.1414
