# Supplementary material
Source: Research Square preprint supplement (doi:10.21203/rs.3.rs-9788709/v1)
Supplement: Supplementary file 3 [file 63e1f913ef6656ac252f3e0a.xlsx]

## Sheet: Sheet1
Scaffold	Variant	Context	ELISA	Orthogonal validation	Interpretation
Repebody	WT	Reference	1	Tm ~69 °C; low scattering	Folded reference
Repebody	C219A	Sequence-only PLM	~12-fold	No clear transition;	Assay-high;
				scattering onset ~43 °C	compromised /
					aggregation-prone
VLR	WT	Reference	1	WT-like thermal profile; BLI apparent KD = 31.27 nM;	Folded reference
				no higher-MW band
VLR	A6C	Round 4;	~10^3-fold	WT-like thermal profile; BLI apparent KD = 69.61 nM;	Disulfide-linked higher-MW species;
		WT-background single mutant		higher-MW non-reducing band	avidity-like surface binding
