# Supplementary material
Source: Research Square preprint supplement (doi:10.21203/rs.3.rs-9788709/v1)
Supplement: Supplementary file 4 [file 9c835ecfccdc6bc7ad57503f.xlsx]

## Sheet: README
	Article title:
	Biophysical dissection of high-signal phenotypes in AI-guided evolution of leucine-rich repeat binders
	Journal:
	The Protein Journal
	Authors:
	Junjae Park, Saehae Choi, Eun Yi Jeon, Hyeonjeong Yu, Cho Hyun Kim, Jieun Lee, Soyoung An, Myungho Sohn, Won-Kyu Lee
	Corresponding author:
	Won-Kyu Lee, New Drug Development Center, Osong Medical Innovation Foundation, Cheongju 28160, Republic of Korea
	E-mail: gregorio7@korea.kr
	This Excel file contains WT-normalized apparent activity values used as experimental labels during EVOLVEpro-guided optimization of the VLR and repebody scaffolds. Apparent activity was calculated as WT apparent EC50 divided by variant apparent EC50 within each experimental round.

## Sheet: VLR_activity
Variant	activity
Round1	R1
54N	2.70885	AiCE_Seed
75N	1.1	AiCE_Seed
43K	0.894762
54T	1.08158
59R	2.35392
95Y	0.895519
106Q	0.894762
121Y	0.92449
122F	0.980987
125C	1.60479
135T	1.25051
139F	2.75588
151K	2.01456
Round2	R2
11H	1.03275
65L	1.16783
139L	1.70087
146K	5.2511
65K	1.21517
62K	1.22492
87V	0.506534
89K	1.08374
89L	0.993916
62R	0.713427
86F	0.908027
146E	0.92751
Round3	R3
17W	1.55312
52V	1.0255
84E	0.956246
84C	0.954763
84Q	0.956015
110D	0.974116
114G	1.84243
128K	0.983559
148C	0.954323
Round4	R4
5D	1.54945
5N	1.25746
6C	2720.14
7D	0.748519
26K	1.27341
28K	2.4405
42W	0.511424
82A	2.13577
114W	0.3345
114A	1.44485
139Y	1.34374
139S	1.44432
Round5	R5
6N	0.524
6I	0.535
28H	3.13833
65H	4.62043
78Y	0.5
78N	2.95805
78D	0.587
78K	0.549
89H	7.64355
141W	4.62862
149C	11.4279
151H	14.671

## Sheet: Repebody_Activity
Variant	activity
Round1	R1
7W	1.4449
19F	1.01309
25T	1.13085
95C	0.92934
118T	1.16749
122F	1.0157
213V	1.11515
195H	0.960745
218Y	0.908404
219L	1.9369
246V	1.55219
265C	1.46321
Round2	R2
219S	2.22932
219E	1.09182
221D	1.83446
219P	1.19091
219I	2.08061
221P	1.03956
221A	1.56647
221G	0.94884
221Q	0.891876
219G	1.67752
Round3	R3
76S	1.73755
76N	0
76A	0.110831
219A	11.673
219T	1.92258
219V	5.83106
219M	0.110831
219N	3.96891
219D	6.35684
219K	2.42903
13A	0.110831
Round4	R4
21V	4.80609	AiCE
39K	2.97777
106R	2.10109
130R	4.50408
182N	2.54462	AiCE
235C	3.56356
238C	2.57326
239C	2.63357
248C	3.29441
251K	5.25982
254C	0.5
257C	0.1
237C	1.74704
Round5	R5
77R	2.7666
83R	0.589812
126R	2.3119
174R	1.23084
251R	0.921273
251A	7.63359
251P	2.7452
251S	1.19956
251L	9.19732
102R	1.53118
219Y	0.661058
251T	1.68299
