# Supplementary material
Source: Research Square preprint supplement (doi:10.21203/rs.3.rs-9788709/v1)
Supplement: Supplementary file 5 [file a6aee57abbd7f9f1b11c8f69.xlsx]

## Sheet: Sheet1
	Article title:
	Biophysical dissection of high-signal phenotypes in AI-guided evolution of leucine-rich repeat binders
	Journal:
	The Protein Journal
	Authors:
	Junjae Park, Saehae Choi, Eun Yi Jeon, Hyeonjeong Yu, Cho Hyun Kim, Jieun Lee, Soyoung An, Myungho Sohn, Won-Kyu Lee
	Corresponding author:
	Won-Kyu Lee, New Drug Development Center, Osong Medical Innovation Foundation, Cheongju 28160, Republic of Korea
	E-mail: gregorio7@korea.kr
	This Excel file contains Prometheus Panta measurements used to evaluate thermal unfolding and aggregation-associated light-scattering behavior of WT and selected variant proteins.

## Sheet: Overview
Capillary	Sample ID	Excitation Power	Start Temperature	End Temperature	Temperature Slope	Start Time	Duration	Custom Marker #1 for Ratio	Custom Marker #2 for Ratio	Onset #1 for Ratio	Inflection Point #1 for Ratio	Inflection Point #2 for Ratio	Inflection Point #3 for Ratio
1	Repebody_WT	0.4	20	95	1	2025-12-04 14:26:45	1:15:00			60.3278	66.9758
2		0.4	20	95	1	2025-12-04 14:26:45	1:15:00			60.5546	66.608
3		0.4	20	95	1	2025-12-04 14:26:45	1:15:00			60.4407	66.9195
4		0.4	20	95	1	2025-12-04 14:26:45	1:15:00				55.0133	68.7513
5		0.4	20	95	1	2025-12-04 14:26:45	1:15:00				54.8111	68.6311
6		0.4	20	95	1	2025-12-04 14:26:45	1:15:00				54.9531	68.9562
7	R1_top	0.4	20	95	1	2025-12-04 14:26:45	1:15:00				38.513	45.6173	61.001
8		0.4	20	95	1	2025-12-04 14:26:45	1:15:00				39.0518	45.748	60.4277
9		0.4	20	95	1	2025-12-04 14:26:45	1:15:00	60.2654	40.5923		45.5599
10	R2_top	0.4	20	95	1	2025-12-04 14:26:45	1:15:00				46.1243	52.4883
11		0.4	20	95	1	2025-12-04 14:26:45	1:15:00	45.4751			52.1174
12		0.4	20	95	1	2025-12-04 14:26:45	1:15:00			45.7197	46.2999	52.4423	62.9645
13	R2_top_2	0.4	20	95	1	2025-12-04 14:26:45	1:15:00	49.9333		55.7356	59.6652
14		0.4	20	95	1	2025-12-04 14:26:45	1:15:00	49.4379		55.5118	59.4127
15		0.4	20	95	1	2025-12-04 14:26:45	1:15:00
16	R3_top	0.4	20	95	1	2025-12-04 14:26:45	1:15:00				38.8222	46.0234	61.9931
17		0.4	20	95	1	2025-12-04 14:26:45	1:15:00				37.7848	45.9523	62.0664
18		0.4	20	95	1	2025-12-04 14:26:45	1:15:00				38.1501	46.0257	62.4082
19	R3_top_2	0.4	20	95	1	2025-12-04 14:26:45	1:15:00				33.1523	45.617	62.1584
20		0.4	20	95	1	2025-12-04 14:26:45	1:15:00				34.2808	45.7013	60.4964
21		0.4	20	95	1	2025-12-04 14:26:45	1:15:00				33.7062	45.6269	64.1707
22	IF-derived repebody	0.4	20	95	1	2025-12-04 14:26:45	1:15:00			60.4229	66.3954
23		0.4	20	95	1	2025-12-04 14:26:45	1:15:00			60.2476	66.3139
24		0.4	20	95	1	2025-12-04 14:26:45	1:15:00			59.6381	66.2656
25	R4_top	0.4	20	95	1	2025-12-04 14:26:45	1:15:00			60.1938	65.1064
26		0.4	20	95	1	2025-12-04 14:26:45	1:15:00			59.8111	65.2112
27		0.4	20	95	1	2025-12-04 14:26:45	1:15:00			59.9251	65.1894
28	IF-derived repebody	0.4	20	95	1	2025-12-04 14:26:45	1:15:00			60.9205	67.473
29		0.4	20	95	1	2025-12-04 14:26:45	1:15:00			61.1878	67.5171
30		0.4	20	95	1	2025-12-04 14:26:45	1:15:00			60.9227	67.5257
31	R4_top_2	0.4	20	95	1	2025-12-04 14:26:45	1:15:00			42.1614	45.1487	62.5892
32		0.4	20	95	1	2025-12-04 14:26:45	1:15:00				45.145	63.5044
33		0.4	20	95	1	2025-12-04 14:26:45	1:15:00			41.2873	45.1671	63.6517
34	R5_top	0.4	20	95	1	2025-12-04 14:26:45	1:15:00	40.5018	52.0748		46.0173
35		0.4	20	95	1	2025-12-04 14:26:45	1:15:00	40.3589	51.789		45.9937
36		0.4	20	95	1	2025-12-04 14:26:45	1:15:00	52.5747		43.8066	46.1127
37	R5_top	0.4	20	95	1	2025-12-04 14:26:45	1:15:00	66.7908		41.0713	45.1595
38		0.4	20	95	1	2025-12-04 14:26:45	1:15:00			40.8824	45.1648	65.6579
39		0.4	20	95	1	2025-12-04 14:26:45	1:15:00			41.1843	45.097	66.5619
40	VLR_WT	0.4	20	95	1	2025-12-04 14:26:45	1:15:00			60.158	69.2016
41		0.4	20	95	1	2025-12-04 14:26:45	1:15:00			59.4065	69.0991
42		0.4	20	95	1	2025-12-04 14:26:45	1:15:00	63.2353			69.0683
43	VLR_A6C	0.4	20	95	1	2025-12-04 14:26:45	1:15:00			60.3843	67.8564
44		0.4	20	95	1	2025-12-04 14:26:45	1:15:00			58.4948	68.024
45		0.4	20	95	1	2025-12-04 14:26:45	1:15:00			59.9455	68.0232
46	VLR_A6N	0.4	20	95	1	2025-12-04 14:26:45	1:15:00				55.3432	69.6524
47		0.4	20	95	1	2025-12-04 14:26:45	1:15:00			55.8047	56.0976	69.6462
48		0.4	20	95	1	2025-12-04 14:26:45	1:15:00				55.8457	69.5273

## Sheet: Scattering
	Capillary	1	2	3	4	5	6	7	8	9	10	11	12	13	14	15	16	17	18	19	20	21	22	23	24	25	26	27	28	29	30	31	32	33	34	35	36	37	38	39	40	41	42	43	44	45	46	47	48
	Sample ID	Repebody_WT						R1_top			R2_top			R2_top_2			R3_top			R3_top_2			IF-derived repebody			R4_top			IF-derived repebody			R4_top_2			R5_top			R5_top			VLR_WT			VLR_A6C			VLR_R5_top
Time [s]	Temperature [°C]	First Derivative	First Derivative	First Derivative	First Derivative	First Derivative	First Derivative	First Derivative	First Derivative	First Derivative	First Derivative	First Derivative	First Derivative	First Derivative	First Derivative	First Derivative	First Derivative	First Derivative	First Derivative	First Derivative	First Derivative	First Derivative	First Derivative	First Derivative	First Derivative	First Derivative	First Derivative	First Derivative	First Derivative	First Derivative	First Derivative	First Derivative	First Derivative	First Derivative	First Derivative	First Derivative	First Derivative	First Derivative	First Derivative	First Derivative	First Derivative	First Derivative	First Derivative	First Derivative	First Derivative	First Derivative	First Derivative	First Derivative	First Derivative
2.29258	20	-0.127282	-0.024142	0.145243	-0.286029	0.00985605	0.11673	-0.17812	-0.125062	-0.0168059	-0.223336	0.119501	0.0467537	-0.390329	0.0872214	0.00197957	-0.034165	0.0717993	-0.0110006	-0.0712937	0.0542267	-0.0652184	0.0216907	-0.0270799	-0.13628	-0.00849284	0.0412669	-0.121396	-0.0158191	-0.0595261	-0.0540391	0.0646428	0.0431101	-0.0343065	0.030931	-0.0259156	-0.117989	0.052153	-0.0229758	-0.00667449	-0.0531141	-0.0339575	-0.0179409	-0.0320188	-0.211228	-0.0183401	-0.0378984	-0.0389124	-0.0866928
24.4471	20.0541	-0.126704	-0.021909	0.140199	-0.279696	0.0106564	0.113033	-0.172353	-0.12185	-0.0184988	-0.218112	0.118099	0.0461111	-0.381431	0.0863801	0.00197957	-0.032725	0.0691212	-0.0114671	-0.0693251	0.0516041	-0.0646317	0.021238	-0.027969	-0.132976	-0.00869447	0.0390846	-0.118058	-0.0156676	-0.0593112	-0.0526572	0.0626984	0.0411108	-0.0334507	0.0289535	-0.0257332	-0.115289	0.0499583	-0.0225604	-0.00675854	-0.0528095	-0.033413	-0.0179271	-0.0320639	-0.206829	-0.0185605	-0.0375992	-0.0379988	-0.0860483
33.3874	20.1081	-0.126066	-0.0197139	0.135206	-0.273363	0.0114456	0.109347	-0.166603	-0.118703	-0.0201654	-0.212914	0.116693	0.0454894	-0.372628	0.0855197	0.00197957	-0.0313003	0.0664761	-0.0119093	-0.0673849	0.0489964	-0.0640145	0.0207535	-0.0288494	-0.129692	-0.00891582	0.0369303	-0.114743	-0.0155283	-0.0590758	-0.0512864	0.0607664	0.0391545	-0.0326082	0.0269886	-0.0255377	-0.112617	0.0477997	-0.0221489	-0.00686119	-0.0524883	-0.0328727	-0.0179323	-0.0320975	-0.202434	-0.0187877	-0.0372976	-0.0371188	-0.0853954
40.6928	20.1622	-0.125367	-0.0175574	0.130264	-0.26703	0.0122238	0.105671	-0.16087	-0.115622	-0.0218048	-0.207743	0.115281	0.044889	-0.363922	0.0846399	0.00197957	-0.0298916	0.0638642	-0.0123265	-0.0654737	0.046404	-0.0633664	0.0202368	-0.0297206	-0.126428	-0.00915718	0.0348049	-0.11145	-0.0154017	-0.0588194	-0.0499271	0.0588468	0.037242	-0.0317793	0.0250369	-0.0253289	-0.109974	0.0456774	-0.0217412	-0.00698244	-0.05215	-0.0323368	-0.0179566	-0.0321191	-0.198041	-0.0190218	-0.0369935	-0.0362728	-0.0847338
46.9685	20.2163	-0.124606	-0.0154399	0.125374	-0.260698	0.012991	0.102006	-0.155155	-0.112607	-0.0234161	-0.202598	0.113863	0.0443106	-0.355315	0.0837406	0.00197957	-0.0284993	0.0612858	-0.0127179	-0.0635919	0.0438271	-0.0626872	0.0196875	-0.0305827	-0.123185	-0.0094187	0.0327093	-0.108179	-0.0152884	-0.0585414	-0.0485798	0.0569393	0.0353736	-0.0309644	0.023099	-0.0251063	-0.107359	0.0435915	-0.0213368	-0.00712209	-0.0517944	-0.0318051	-0.0179995	-0.0321284	-0.193649	-0.019263	-0.0366866	-0.0354609	-0.0840633
52.5978	20.2704	-0.123783	-0.0133618	0.120535	-0.254366	0.0137473	0.0983531	-0.149458	-0.109657	-0.0249985	-0.197482	0.112438	0.0437548	-0.346807	0.0828217	0.00197957	-0.0271239	0.0587409	-0.0130826	-0.0617401	0.0412661	-0.0619769	0.0191054	-0.0314353	-0.119963	-0.00970046	0.0306443	-0.104931	-0.0151889	-0.0582413	-0.0472448	0.0550435	0.0335498	-0.0301637	0.0211754	-0.0248694	-0.104773	0.0415418	-0.0209351	-0.0072798	-0.0514212	-0.0312776	-0.0180605	-0.0321248	-0.189257	-0.0195116	-0.0363763	-0.0346833	-0.0833837
57.632	20.3244	-0.122898	-0.0113229	0.115748	-0.248036	0.0144929	0.0947126	-0.14378	-0.106772	-0.0265512	-0.192394	0.111006	0.0432223	-0.338398	0.0818832	0.00197957	-0.0257661	0.0562291	-0.0134198	-0.0599185	0.0387211	-0.0612357	0.0184904	-0.0322785	-0.116763	-0.0100024	0.0286107	-0.101703	-0.0151038	-0.0579188	-0.0459226	0.0531586	0.0317705	-0.0293778	0.0192665	-0.0246179	-0.102217	0.0395276	-0.0205357	-0.00745505	-0.0510304	-0.0307541	-0.0181391	-0.0321081	-0.184862	-0.0197679	-0.0360624	-0.0339396	-0.0826948
62.3166	20.3785	-0.12195	-0.00932322	0.111011	-0.241709	0.0152281	0.0910851	-0.138121	-0.103949	-0.0280735	-0.187334	0.109565	0.0427135	-0.330088	0.0809254	0.00197957	-0.0244261	0.0537499	-0.0137289	-0.0581273	0.036192	-0.0604641	0.0178425	-0.0331122	-0.113584	-0.0103243	0.0266091	-0.0984958	-0.0150338	-0.0575733	-0.0446135	0.0512838	0.0300356	-0.0286066	0.0173729	-0.0243513	-0.0996907	0.0375481	-0.0201377	-0.00764713	-0.0506218	-0.0302345	-0.0182341	-0.0320779	-0.180462	-0.0200319	-0.0357442	-0.0332294	-0.0819964
66.799	20.4326	-0.120939	-0.00736215	0.106325	-0.235383	0.0159533	0.0874711	-0.132482	-0.101188	-0.0295647	-0.182305	0.108116	0.0422292	-0.321874	0.0799485	0.00197957	-0.0231043	0.0513023	-0.0140091	-0.0563666	0.0336788	-0.0596627	0.017162	-0.0339364	-0.110427	-0.0106658	0.0246403	-0.0953074	-0.0149793	-0.0572046	-0.0433178	0.0494181	0.0283445	-0.0278506	0.0154949	-0.0240693	-0.0971934	0.0356021	-0.0197402	-0.00785517	-0.0501955	-0.0297183	-0.0183447	-0.032034	-0.176055	-0.0203041	-0.0354214	-0.032552	-0.0812882
71.0609	20.4867	-0.119868	-0.00543906	0.101687	-0.229061	0.0166689	0.083871	-0.126862	-0.0984841	-0.0310243	-0.177305	0.106658	0.0417697	-0.313756	0.0789529	0.00197957	-0.0218012	0.0488853	-0.0142597	-0.0546364	0.0311812	-0.0588324	0.016449	-0.0347511	-0.107292	-0.0110267	0.0227048	-0.0921365	-0.0149411	-0.0568122	-0.042036	0.0475601	0.0266965	-0.0271097	0.013633	-0.0237715	-0.0947253	0.033688	-0.0193421	-0.00807809	-0.0497515	-0.0292053	-0.0184694	-0.031976	-0.171639	-0.0205847	-0.0350931	-0.0319065	-0.0805703
75.1515	20.5407	-0.118735	-0.00355296	0.0970966	-0.222743	0.0173753	0.0802852	-0.121263	-0.0958353	-0.0324518	-0.172335	0.105188	0.0413356	-0.305729	0.0779392	0.00197957	-0.0205169	0.0464975	-0.01448	-0.0529364	0.0286988	-0.0579742	0.0157042	-0.0355564	-0.104178	-0.0114062	0.0208031	-0.0889811	-0.0149197	-0.0563959	-0.0407683	0.0457084	0.0250905	-0.0263842	0.0117873	-0.0234576	-0.0922861	0.0318042	-0.0189424	-0.00831466	-0.04929	-0.0286949	-0.0186067	-0.0319037	-0.167209	-0.0208739	-0.0347589	-0.0312916	-0.0798424
79.1627	20.5948	-0.117544	-0.00170265	0.0925504	-0.216429	0.0180731	0.0767141	-0.115683	-0.0932378	-0.033847	-0.167395	0.103708	0.0409273	-0.297792	0.076908	0.00197957	-0.0192517	0.0441371	-0.0146695	-0.0512663	0.0262312	-0.0570893	0.014928	-0.0363526	-0.101085	-0.0118037	0.0189357	-0.0858393	-0.0149157	-0.0559555	-0.039515	0.0438613	0.0235253	-0.0256741	0.0099583	-0.0231272	-0.089875	0.0299482	-0.0185397	-0.00856344	-0.0488113	-0.0281867	-0.018755	-0.031817	-0.162762	-0.021172	-0.034418	-0.0307061	-0.0791044
82.9641	20.6489	-0.116294	0.000113363	0.0880464	-0.210119	0.0187633	0.0731579	-0.110123	-0.0906872	-0.0352094	-0.162485	0.102214	0.0405453	-0.289939	0.0758602	0.00197957	-0.0180056	0.0418022	-0.0148276	-0.0496257	0.0237778	-0.0561788	0.0141216	-0.03714	-0.0980136	-0.0122186	0.0171027	-0.0827085	-0.0149298	-0.0554907	-0.0382761	0.0420171	0.0219996	-0.0249793	0.00814609	-0.0227803	-0.0874915	0.0281178	-0.0181327	-0.00882271	-0.0483157	-0.02768	-0.0189124	-0.0317157	-0.158296	-0.0214794	-0.0340698	-0.030148	-0.0783563
86.666	20.703	-0.114989	0.0018969	0.0835818	-0.203815	0.0194471	0.0696165	-0.104583	-0.0881787	-0.0365393	-0.157605	0.100707	0.0401896	-0.282166	0.0747964	0.00197957	-0.0167785	0.0394909	-0.0149541	-0.0480138	0.0213377	-0.0552438	0.0132862	-0.0379188	-0.094962	-0.0126501	0.015304	-0.0795865	-0.0149624	-0.0550016	-0.0370517	0.0401741	0.0205118	-0.0242995	0.00635089	-0.0224168	-0.0851344	0.0263102	-0.0177199	-0.00909051	-0.0478042	-0.0271745	-0.0190768	-0.0316	-0.153805	-0.021796	-0.0337136	-0.0296155	-0.077598
90.1959	20.757	-0.11363	0.00365011	0.0791537	-0.197517	0.0201262	0.0660896	-0.0990613	-0.0857071	-0.0378369	-0.152753	0.0991846	0.0398597	-0.27447	0.0737176	0.00197957	-0.0155702	0.0372012	-0.015049	-0.0464297	0.01891	-0.0542853	0.0124238	-0.0386897	-0.0919306	-0.0130972	0.0135392	-0.0764711	-0.0150141	-0.0544886	-0.0358417	0.0383308	0.0190601	-0.023634	0.00457287	-0.0220371	-0.0828026	0.0245227	-0.0173001	-0.00936468	-0.0472776	-0.0266695	-0.0192459	-0.0314699	-0.149287	-0.022122	-0.0333492	-0.0291062	-0.0768294
93.7411	20.8111	-0.112222	0.00537551	0.0747596	-0.191224	0.020803	0.062577	-0.0935576	-0.0832664	-0.0391026	-0.14793	0.0976471	0.0395549	-0.266847	0.0726248	0.00197957	-0.0143803	0.0349312	-0.0151125	-0.0448719	0.016494	-0.0533041	0.0115371	-0.0394533	-0.0889192	-0.0135587	0.0118075	-0.0733604	-0.0150855	-0.0539523	-0.0346456	0.0364858	0.0176425	-0.0229822	0.00281231	-0.0216416	-0.0804946	0.0227523	-0.0168718	-0.00964298	-0.0467374	-0.0261651	-0.0194172	-0.031326	-0.144737	-0.0224569	-0.0329765	-0.0286177	-0.0760504
97.196	20.8652	-0.110768	0.00707582	0.0703968	-0.184939	0.0214801	0.0590782	-0.0880708	-0.0808505	-0.0403369	-0.143134	0.0960935	0.0392733	-0.259291	0.0715191	0.00197957	-0.0132083	0.0326795	-0.0151454	-0.0433386	0.014089	-0.0523013	0.0106291	-0.0402105	-0.0859278	-0.0140334	0.010108	-0.0702527	-0.0151765	-0.0533941	-0.0334631	0.0346383	0.0162568	-0.0223431	0.00106965	-0.0212311	-0.0782083	0.0209963	-0.0164343	-0.00992318	-0.0461849	-0.0256612	-0.019588	-0.0311685	-0.140151	-0.0228004	-0.0325958	-0.0281474	-0.0752612
100.619	20.9193	-0.109273	0.00875383	0.0660629	-0.178663	0.0221606	0.0555933	-0.0825999	-0.0784528	-0.0415404	-0.138365	0.0945238	0.0390129	-0.2518	0.0704014	0.00197957	-0.0120537	0.0304446	-0.0151486	-0.0418277	0.0116947	-0.051278	0.00970328	-0.0409619	-0.0829567	-0.0145196	0.00843941	-0.067147	-0.0152872	-0.0528156	-0.0322937	0.0327873	0.0149005	-0.0217158	-0.000654467	-0.0208066	-0.0759416	0.019252	-0.0159869	-0.0102031	-0.0456217	-0.0251582	-0.0197555	-0.0309979	-0.135528	-0.0231515	-0.0322074	-0.0276926	-0.0744616
103.95	20.9733	-0.107743	0.0104122	0.0617558	-0.172396	0.0228479	0.0521223	-0.077144	-0.0760668	-0.0427133	-0.133621	0.092938	0.0387711	-0.244369	0.0692728	0.00197957	-0.0109161	0.0282255	-0.0151233	-0.0403366	0.00931133	-0.0502354	0.00876353	-0.0417084	-0.0800063	-0.0150157	0.00680006	-0.0640429	-0.015417	-0.0522188	-0.0311371	0.0309326	0.0135711	-0.0210995	-0.00235911	-0.0203692	-0.073692	0.0175171	-0.0155295	-0.0104808	-0.045049	-0.0246568	-0.0199168	-0.0308145	-0.130862	-0.0235089	-0.0318117	-0.0272507	-0.0736516
107.296	21.0274	-0.106185	0.0120536	0.0574736	-0.166141	0.0235454	0.0486659	-0.0717021	-0.0736859	-0.043856	-0.128901	0.0913367	0.0385451	-0.236997	0.0681345	0.00197957	-0.0097952	0.0260215	-0.0150712	-0.0388628	0.0069397	-0.0491752	0.00781416	-0.0424504	-0.0770773	-0.0155204	0.00518825	-0.0609402	-0.0155655	-0.0516059	-0.0299931	0.0290739	0.0122659	-0.0204931	-0.00404308	-0.0199199	-0.0714568	0.0157897	-0.0150624	-0.0107544	-0.0444679	-0.0241581	-0.0200692	-0.0306183	-0.126154	-0.023871	-0.0314093	-0.0268193	-0.0728314
110.589	21.0815	-0.104606	0.01368	0.0532147	-0.159899	0.0242564	0.0452253	-0.0662734	-0.0713038	-0.0449683	-0.124205	0.0897207	0.0383318	-0.229681	0.0669879	0.00197957	-0.00869111	0.023832	-0.0149941	-0.0374036	0.00458096	-0.048099	0.00685978	-0.043188	-0.074171	-0.0160321	0.00360208	-0.0578397	-0.0157317	-0.0509795	-0.0288614	0.0272117	0.0109823	-0.019896	-0.00570491	-0.0194598	-0.0692332	0.0140682	-0.0145866	-0.0110221	-0.0438794	-0.0236633	-0.02021	-0.0304094	-0.1214	-0.0242355	-0.0310006	-0.0263963	-0.072001
113.893	21.1355	-0.103014	0.0152935	0.048978	-0.153673	0.0249842	0.0418023	-0.060857	-0.0689146	-0.04605	-0.119531	0.088091	0.0381282	-0.222418	0.0658341	0.00197957	-0.00760422	0.0216568	-0.014894	-0.0359566	0.00223671	-0.0470087	0.00590512	-0.0439211	-0.0712886	-0.0165494	0.00203967	-0.0547426	-0.0159147	-0.0503419	-0.0277422	0.0253462	0.00971776	-0.0193076	-0.00734297	-0.0189898	-0.0670182	0.0123516	-0.0141035	-0.0112825	-0.0432841	-0.0231743	-0.0203368	-0.0301875	-0.1166	-0.0246003	-0.0305864	-0.0259799	-0.0711603
117.133	21.1896	-0.101415	0.0168957	0.0447628	-0.147464	0.0257315	0.0383992	-0.0554522	-0.0665131	-0.0471005	-0.114878	0.0864492	0.0379318	-0.215206	0.0646746	0.00197957	-0.00653521	0.019496	-0.0147733	-0.0345192	-9.1036e-05	-0.0459064	0.00495501	-0.0446492	-0.068432	-0.0170708	0.000499208	-0.0516506	-0.0161134	-0.0496959	-0.0266356	0.0234784	0.00846974	-0.0187275	-0.00895542	-0.0185111	-0.0648095	0.010639	-0.0136145	-0.0115343	-0.0426825	-0.0226931	-0.0204471	-0.029952	-0.111755	-0.0249628	-0.0301672	-0.0255687	-0.0703096
120.362	21.2437	-0.0998185	0.0184875	0.0405686	-0.141275	0.0265011	0.0350193	-0.0500582	-0.0640944	-0.0481191	-0.110244	0.0847969	0.0377399	-0.208044	0.0635105	0.00197957	-0.00548511	0.0173496	-0.0146343	-0.0330897	-0.00239986	-0.044794	0.00401404	-0.0453715	-0.0656032	-0.0175952	-0.00102108	-0.0485656	-0.016327	-0.0490439	-0.0255421	0.0216091	0.00723605	-0.0181557	-0.0105403	-0.0180247	-0.0626046	0.00893006	-0.0131217	-0.0117764	-0.0420749	-0.0222218	-0.020539	-0.0297024	-0.106864	-0.0253204	-0.0297436	-0.0251615	-0.0694489
123.539	21.2978	-0.0982299	0.0200696	0.0363952	-0.135107	0.0272949	0.0316661	-0.0446744	-0.0616546	-0.0491048	-0.105628	0.0831362	0.0375504	-0.200931	0.0623429	0.00197957	-0.00445527	0.0152178	-0.0144795	-0.0316661	-0.00468694	-0.0436734	0.00308643	-0.0460868	-0.0628048	-0.0181214	-0.00252289	-0.0454901	-0.0165546	-0.0483884	-0.0244622	0.0197396	0.00601488	-0.0175922	-0.0120955	-0.0175313	-0.060402	0.00722498	-0.0126269	-0.0120082	-0.0414616	-0.0217628	-0.0206109	-0.0294376	-0.101929	-0.0256708	-0.029316	-0.0247575	-0.0685783
126.778	21.3518	-0.0966558	0.0216418	0.0322426	-0.128963	0.0281146	0.028344	-0.0393002	-0.0591908	-0.0500565	-0.101028	0.0814693	0.0373617	-0.193866	0.0611726	0.00197957	-0.00344738	0.0131008	-0.0143112	-0.0302472	-0.00694912	-0.0425463	0.00217585	-0.0467937	-0.0600393	-0.0186483	-0.00400786	-0.0424268	-0.0167954	-0.0477318	-0.0233966	0.017871	0.00480477	-0.017037	-0.0136191	-0.0170319	-0.0582006	0.00552433	-0.0121323	-0.0122293	-0.0408431	-0.0213183	-0.0206616	-0.029157	-0.0969525	-0.0260116	-0.028885	-0.024356	-0.067698
130.034	21.4059	-0.0951018	0.0232035	0.028111	-0.122844	0.0289611	0.0250573	-0.0339349	-0.0567007	-0.0509729	-0.0964439	0.0797983	0.0371723	-0.186849	0.0600003	0.00197957	-0.00246346	0.0109985	-0.0141319	-0.0288316	-0.0091831	-0.0414144	0.00128519	-0.0474906	-0.0573092	-0.0191751	-0.00547762	-0.0393785	-0.017049	-0.047076	-0.0223462	0.0160049	0.00360465	-0.0164908	-0.0151091	-0.0165268	-0.0559999	0.00382912	-0.0116396	-0.0124398	-0.0402197	-0.0208904	-0.0206904	-0.0288594	-0.0919366	-0.026341	-0.0284509	-0.0239567	-0.0668081
133.313	21.46	-0.0935725	0.0247538	0.0240004	-0.116751	0.0298347	0.0218111	-0.0285781	-0.0541834	-0.0518526	-0.0918734	0.0781258	0.0369813	-0.17988	0.0588264	0.00197957	-0.00150577	0.00891072	-0.0139437	-0.0274186	-0.0113855	-0.040279	0.000416573	-0.0481754	-0.0546168	-0.0197011	-0.00693387	-0.0363483	-0.0173149	-0.0464227	-0.0213121	0.0141425	0.0024138	-0.015954	-0.0165639	-0.0160162	-0.0538001	0.00214073	-0.0111509	-0.0126401	-0.0395919	-0.0204809	-0.0206971	-0.0285442	-0.0868842	-0.0266575	-0.028014	-0.0235593	-0.0659089
136.527	21.5141	-0.0920718	0.0262912	0.0199112	-0.110684	0.0307352	0.0186103	-0.0232291	-0.051639	-0.0526942	-0.087315	0.0764539	0.0367883	-0.172958	0.0576509	0.00197957	-0.000576837	0.00683688	-0.0137487	-0.0260074	-0.013553	-0.0391416	-0.000428726	-0.0488462	-0.051964	-0.0202257	-0.00837838	-0.0333395	-0.0175929	-0.0457731	-0.0202954	0.0122854	0.00123189	-0.0154275	-0.0179823	-0.0155001	-0.0516019	0.000460777	-0.0106679	-0.0128314	-0.03896	-0.0200915	-0.0206821	-0.0282106	-0.0817985	-0.02696	-0.0275744	-0.0231637	-0.0650005
139.771	21.5681	-0.0906027	0.027814	0.0158433	-0.104645	0.0316615	0.0154602	-0.0178874	-0.0490687	-0.0534964	-0.0827672	0.0747848	0.0365932	-0.166083	0.0564738	0.00197957	0.000320711	0.00477633	-0.0135489	-0.0245976	-0.0156825	-0.0380033	-0.0012502	-0.0495007	-0.0493522	-0.0207489	-0.00981302	-0.0303553	-0.017883	-0.0451281	-0.0192975	0.0104348	5.89894e-05	-0.0149121	-0.0193633	-0.0149782	-0.0494065	-0.00120902	-0.0101924	-0.013015	-0.0383247	-0.0197236	-0.0206462	-0.027858	-0.076683	-0.0272478	-0.0271322	-0.0227699	-0.0640833
142.99	21.6222	-0.0891672	0.0293201	0.0117965	-0.0986321	0.0326119	0.0123655	-0.0125521	-0.0464747	-0.054258	-0.0782282	0.0731204	0.036396	-0.159256	0.0552947	0.00197957	0.00118424	0.00272823	-0.0133462	-0.0231889	-0.0177714	-0.0368653	-0.00204809	-0.0501368	-0.0467824	-0.0212708	-0.0112398	-0.027399	-0.0181851	-0.0444881	-0.0183198	0.00859221	-0.00110441	-0.0144085	-0.0207067	-0.0144499	-0.0472158	-0.00286698	-0.00972594	-0.0131928	-0.0376867	-0.0193786	-0.0205911	-0.0274862	-0.0715416	-0.0275207	-0.0266873	-0.0223781	-0.0631575
146.283	21.6763	-0.0877664	0.0308074	0.00777059	-0.0926454	0.0335843	0.00933112	-0.0072225	-0.04386	-0.0549778	-0.0736965	0.0714625	0.0361973	-0.152476	0.0541129	0.00197957	0.00201125	0.000691564	-0.0131425	-0.0217813	-0.0198175	-0.0357285	-0.00282328	-0.0507523	-0.0442553	-0.0217923	-0.0126611	-0.024474	-0.0184992	-0.043853	-0.0173637	0.00675907	-0.00225743	-0.0139172	-0.0220126	-0.0139145	-0.045032	-0.00451139	-0.00927026	-0.0133671	-0.0370468	-0.0190579	-0.0205189	-0.0270952	-0.0663785	-0.0277789	-0.0262396	-0.0219885	-0.0622234
149.559	21.7304	-0.0864002	0.0322736	0.00376488	-0.0866838	0.0345757	0.006361	-0.00189742	-0.041229	-0.0556551	-0.0691703	0.0698125	0.0359975	-0.145744	0.0529274	0.00197957	0.00279952	-0.00133481	-0.0129394	-0.0203747	-0.0218189	-0.0345934	-0.00357728	-0.0513455	-0.0417709	-0.0223144	-0.0140794	-0.0215836	-0.0188257	-0.0432227	-0.0164305	0.00493692	-0.0033988	-0.0134385	-0.0232819	-0.0133711	-0.0428579	-0.00614052	-0.00882676	-0.0135406	-0.036406	-0.0187623	-0.0204325	-0.0266854	-0.0611984	-0.0280231	-0.0257888	-0.0216016	-0.0612815
152.799	21.7844	-0.0850677	0.0337164	-0.000221423	-0.080746	0.0355828	0.00345855	0.00342421	-0.0385869	-0.0562896	-0.0646477	0.0681715	0.0357971	-0.139058	0.0517369	0.00197957	0.00354718	-0.00335218	-0.0127388	-0.0189691	-0.0237744	-0.0334601	-0.00431215	-0.0519147	-0.0393287	-0.0228387	-0.0154979	-0.0187313	-0.019165	-0.0425965	-0.0155214	0.00312752	-0.00452688	-0.0129724	-0.0245162	-0.0128189	-0.0406964	-0.00775256	-0.00839687	-0.0137164	-0.0357658	-0.0184927	-0.0203355	-0.0262576	-0.0560063	-0.0282546	-0.025335	-0.0212177	-0.0603321
155.963	21.8385	-0.0837667	0.0351335	-0.00418923	-0.0748302	0.0366015	0.000626272	0.00874364	-0.0359401	-0.0568813	-0.060127	0.0665408	0.0355963	-0.132418	0.0505398	0.00197957	0.00425272	-0.00536196	-0.0125425	-0.0175643	-0.0256832	-0.0323284	-0.00503054	-0.0524584	-0.0369275	-0.0233667	-0.0169197	-0.0159207	-0.0195176	-0.041974	-0.0146374	0.00133286	-0.00563971	-0.0125182	-0.0257179	-0.0122572	-0.0385508	-0.00934555	-0.00798198	-0.013898	-0.0351277	-0.0182496	-0.0202323	-0.0258128	-0.0508079	-0.0284753	-0.0248785	-0.0208375	-0.0593759
159.228	21.8926	-0.0824941	0.0365229	-0.0081394	-0.0689342	0.0376277	-0.00213442	0.0140622	-0.0332965	-0.0574311	-0.0556063	0.0649211	0.035395	-0.125825	0.0493341	0.00197957	0.00491515	-0.00736553	-0.0123523	-0.0161601	-0.0275447	-0.031198	-0.00573571	-0.0529757	-0.0345654	-0.0239002	-0.0183487	-0.0131556	-0.0198838	-0.0413544	-0.0137791	-0.000444749	-0.006735	-0.012075	-0.0268902	-0.0116855	-0.0364248	-0.0109173	-0.00758368	-0.0140894	-0.0344934	-0.0180332	-0.0201277	-0.0253527	-0.0456098	-0.0286871	-0.02442	-0.0204614	-0.0584133
162.463	21.9466	-0.0812458	0.0378825	-0.0120725	-0.0630557	0.0386566	-0.00482336	0.0193814	-0.0306654	-0.0579408	-0.0510836	0.0633135	0.0351929	-0.119278	0.0481178	0.00197957	0.00553404	-0.00936406	-0.0121702	-0.0147559	-0.029359	-0.0300679	-0.0064316	-0.0534658	-0.0322399	-0.0244411	-0.0197887	-0.01044	-0.020264	-0.0407372	-0.0129468	-0.00220262	-0.00781014	-0.0116414	-0.0280368	-0.0111036	-0.0343219	-0.0124656	-0.0072039	-0.014295	-0.0338648	-0.0178435	-0.0200276	-0.0248794	-0.0404197	-0.0288927	-0.0239607	-0.0200905	-0.0574449
165.735	22.0007	-0.0800165	0.0392101	-0.0159886	-0.0571918	0.0396828	-0.00744157	0.0247027	-0.0280577	-0.0584131	-0.0465568	0.0617189	0.0349896	-0.112777	0.0468885	0.00197957	0.0061097	-0.0113582	-0.0119982	-0.0133515	-0.0311263	-0.028937	-0.00712275	-0.0539287	-0.0299476	-0.0249914	-0.0212442	-0.00777813	-0.020658	-0.0401213	-0.0121407	-0.00393752	-0.00886204	-0.011215	-0.0291624	-0.0105116	-0.0322461	-0.0139874	-0.00684517	-0.01452	-0.0332438	-0.0176804	-0.0199384	-0.024395	-0.0352472	-0.0290943	-0.0235021	-0.0197262	-0.0564716
168.988	22.0548	-0.0787991	0.0405035	-0.0198865	-0.0513394	0.0407005	-0.00999116	0.0300274	-0.025487	-0.0588517	-0.0420241	0.0601385	0.0347841	-0.106325	0.0456436	0.00197957	0.00664323	-0.0133476	-0.0118382	-0.0119467	-0.0328476	-0.0278036	-0.00781436	-0.0543642	-0.0276853	-0.0255537	-0.0227195	-0.00517519	-0.0210652	-0.0395061	-0.0113604	-0.00564546	-0.00988696	-0.0107932	-0.0302718	-0.00990951	-0.0302018	-0.0154793	-0.00651081	-0.0147702	-0.0326319	-0.0175437	-0.0198678	-0.0239025	-0.0301041	-0.0292943	-0.0230465	-0.0193707	-0.055494
172.221	22.1089	-0.0775848	0.0417596	-0.0237636	-0.0454949	0.0417028	-0.0124751	0.0353566	-0.0229703	-0.0592613	-0.0374835	0.0585739	0.0345754	-0.0999248	0.0443802	0.00197957	0.0071365	-0.0153303	-0.0116923	-0.0105416	-0.0345236	-0.0266654	-0.00851253	-0.0547727	-0.0254492	-0.0261311	-0.0242191	-0.00263739	-0.0214846	-0.0388905	-0.0106054	-0.0073215	-0.0108801	-0.0103728	-0.0313704	-0.00929765	-0.0281941	-0.0169359	-0.0062051	-0.0150522	-0.0320305	-0.0174332	-0.0198247	-0.0234046	-0.0250049	-0.0294951	-0.022597	-0.0190278	-0.0545129
175.443	22.1629	-0.0763611	0.0429741	-0.027614	-0.0396543	0.0426814	-0.0148971	0.0406907	-0.0205295	-0.0596466	-0.032934	0.0570272	0.0343628	-0.0935859	0.0430946	0.00197957	0.00759191	-0.0173024	-0.0115621	-0.00913768	-0.0361551	-0.0255186	-0.0092248	-0.0551544	-0.0232364	-0.0267273	-0.0257467	-0.000172817	-0.0219145	-0.0382732	-0.00987459	-0.00895929	-0.0118349	-0.00995058	-0.0324636	-0.00867638	-0.0262295	-0.0183494	-0.00593351	-0.0153743	-0.0314403	-0.0173492	-0.0198204	-0.0229044	-0.0199673	-0.0296987	-0.0221573	-0.0187033	-0.053529
178.71	22.217	-0.0751108	0.0441397	-0.0314279	-0.0338132	0.0436266	-0.0172608	0.0460286	-0.0181938	-0.0600125	-0.0283757	0.0555012	0.034146	-0.087324	0.0417822	0.00197957	0.00801192	-0.0192564	-0.0114484	-0.00773795	-0.0377416	-0.0243578	-0.00996134	-0.055509	-0.0210446	-0.0273477	-0.0273047	0.00220768	-0.0223526	-0.0376519	-0.00916732	-0.0105505	-0.0127418	-0.00952379	-0.033557	-0.0080459	-0.0243167	-0.0197079	-0.00570287	-0.0157467	-0.0308606	-0.0172924	-0.0198687	-0.0224044	-0.0150137	-0.0299074	-0.0217324	-0.0184065	-0.0525427
181.965	22.2711	-0.073809	0.0452448	-0.0351884	-0.027967	0.0445261	-0.0195695	0.0513671	-0.0160033	-0.0603625	-0.0238111	0.0539996	0.0339265	-0.0811666	0.0404363	0.00197957	0.00839824	-0.0211806	-0.0113508	-0.00634847	-0.0392803	-0.0231742	-0.0107367	-0.0558355	-0.0188736	-0.0279995	-0.0288933	0.00448919	-0.022797	-0.0370225	-0.00848346	-0.0120842	-0.0135862	-0.00909039	-0.0346556	-0.00740582	-0.022468	-0.0209941	-0.00552174	-0.0161832	-0.0302891	-0.0172642	-0.0199872	-0.0219062	-0.0101711	-0.0301237	-0.0213278	-0.0181517	-0.0515538
185.231	22.3252	-0.0724185	0.0462702	-0.0388689	-0.0221105	0.0453633	-0.0218252	0.0566991	-0.014014	-0.0606967	-0.019247	0.0525265	0.0337092	-0.0751591	0.0390469	0.00197957	0.00875059	-0.0230566	-0.0112657	-0.00498026	-0.0407656	-0.0219546	-0.0115723	-0.0561308	-0.016726	-0.0286934	-0.0305083	0.00665112	-0.0232461	-0.0363775	-0.00782449	-0.0135458	-0.0143458	-0.00865011	-0.0357632	-0.0067541	-0.0207019	-0.0221819	-0.00540073	-0.0167023	-0.0297199	-0.017267	-0.0201991	-0.0214101	-0.00547315	-0.0303514	-0.0209498	-0.0179605	-0.0505611
188.444	22.3792	-0.0708837	0.0471859	-0.0424281	-0.0162382	0.0461161	-0.0240274	0.0620121	-0.0123041	-0.0610094	-0.0146969	0.0510858	0.0335045	-0.0693727	0.0375994	0.00197957	0.00906486	-0.0248571	-0.0111841	-0.00365223	-0.0421871	-0.020679	-0.0125002	-0.0563891	-0.0146087	-0.0294453	-0.0321385	0.00866539	-0.0237006	-0.0357029	-0.00719476	-0.0149163	-0.0149865	-0.00820581	-0.0368818	-0.00608562	-0.019046	-0.0232345	-0.00535276	-0.0173288	-0.0291427	-0.0173042	-0.020535	-0.0209138	-0.000960099	-0.0305963	-0.0206043	-0.017865	-0.0495617
191.705	22.4333	-0.0691221	0.0479468	-0.0458054	-0.0103448	0.0467539	-0.0261718	0.0672851	-0.0109809	-0.0612859	-0.0101851	0.0496794	0.0333322	-0.0639135	0.0360727	0.00197957	0.00933101	-0.0265436	-0.0110876	-0.00239482	-0.0435285	-0.0193189	-0.0135677	-0.0566002	-0.0125347	-0.0302783	-0.033762	0.0104952	-0.0241652	-0.0349751	-0.00660311	-0.016172	-0.0154583	-0.00776515	-0.0380098	-0.0053902	-0.0175411	-0.0241009	-0.00539262	-0.0180959	-0.0285404	-0.0173799	-0.0210345	-0.020411	0.00332139	-0.0308685	-0.0202966	-0.0179109	-0.0485497
194.971	22.4874	-0.0670167	0.0484901	-0.0489185	-0.00442586	0.0472357	-0.0282491	0.0724858	-0.0101839	-0.0614989	-0.00574993	0.0483047	0.0332259	-0.0589273	0.0344381	0.00197957	0.00953127	-0.0280651	-0.0109446	-0.00125353	-0.0447679	-0.0178364	-0.0148418	-0.0567489	-0.0105231	-0.0312246	-0.0353411	0.0120967	-0.0246508	-0.0341569	-0.00606477	-0.0172863	-0.0156913	-0.00734203	-0.0391415	-0.00465042	-0.0162452	-0.024716	-0.00553489	-0.019045	-0.0278877	-0.017498	-0.0217465	-0.0198903	0.00732257	-0.0311844	-0.0200289	-0.018159	-0.0475158
198.231	22.5415	-0.0644151	0.0487387	-0.0516695	0.00152066	0.0475099	-0.0302463	0.077569	-0.0100766	-0.0616085	-0.00144559	0.0469497	0.0332358	-0.0545895	0.0326619	0.00197957	0.00964075	-0.0293642	-0.0107069	-0.00028928	-0.0458806	-0.0161883	-0.01641	-0.0568156	-0.00859712	-0.0323233	-0.0368205	0.0134274	-0.0251766	-0.0331951	-0.00560175	-0.0182356	-0.0155996	-0.00695662	-0.0402675	-0.00384066	-0.0152323	-0.0250074	-0.00578871	-0.020221	-0.0271513	-0.0176595	-0.0227255	-0.0193354	0.0110025	-0.0315693	-0.0197978	-0.0186821	-0.0464464
201.399	22.5955	-0.0611395	0.0486076	-0.0539631	0.00747169	0.0475062	-0.0321315	0.0824664	-0.0108107	-0.0615479	0.00265295	0.0455802	0.0334374	-0.0510763	0.0307175	0.00197957	0.00961672	-0.0304007	-0.0103074	0.000419486	-0.0468305	-0.0143499	-0.0183759	-0.0567669	-0.0067838	-0.0336156	-0.038114	0.0144589	-0.0257765	-0.0320105	-0.00525468	-0.0190174	-0.0150922	-0.00663904	-0.0413631	-0.00292404	-0.0146068	-0.0249255	-0.00614654	-0.0216535	-0.0262927	-0.0178667	-0.0240189	-0.0187256	0.0143373	-0.0320681	-0.019586	-0.0195465	-0.0453183
204.616	22.6496	-0.0563881	0.0471846	-0.0552407	0.0120174	0.0463672	-0.0323972	0.0862747	-0.0125919	-0.0598215	0.00581091	0.0436566	0.0345541	-0.0496235	0.0287171	0.00197957	0.00844697	-0.0314548	-0.00938378	0.000236382	-0.0465246	-0.0127997	-0.0211364	-0.0558016	-0.00564245	-0.0352996	-0.0383402	0.0147521	-0.0268832	-0.0298842	-0.00578221	-0.0198543	-0.0136987	-0.00674506	-0.0416776	-0.00161378	-0.0155393	-0.0247338	-0.0065222	-0.0231112	-0.0251609	-0.0185506	-0.0256901	-0.0179466	0.0170121	-0.0330993	-0.0191472	-0.0207551	-0.0437784
207.851	22.7037	-0.0513854	0.0455848	-0.0564307	0.0163944	0.0449021	-0.0326757	0.0899009	-0.0146398	-0.0580119	0.00884615	0.0417666	0.0357745	-0.0482969	0.0267605	0.00197957	0.00726219	-0.0325184	-0.00849483	-9.49188e-05	-0.0461608	-0.0113006	-0.0239763	-0.0547954	-0.00444911	-0.0369893	-0.0384247	0.014974	-0.0279472	-0.027686	-0.00628697	-0.0207007	-0.0122875	-0.00688631	-0.0420356	-0.000350404	-0.0166014	-0.0245338	-0.00691278	-0.0245778	-0.0240046	-0.019208	-0.0274722	-0.0172737	0.0193118	-0.0341974	-0.0187409	-0.022004	-0.0422225
211.086	22.7578	-0.0461725	0.0438219	-0.0575348	0.0205926	0.0431278	-0.0329875	0.0933322	-0.0169048	-0.0561218	0.0117447	0.0399216	0.0370852	-0.047075	0.0248714	0.00197957	0.00607307	-0.0335735	-0.00765096	-0.000573108	-0.0457437	-0.00986987	-0.0268488	-0.053759	-0.00321675	-0.0386603	-0.0383608	0.0151355	-0.0289587	-0.0254341	-0.00675461	-0.0215508	-0.0108937	-0.00706568	-0.0424329	0.000843144	-0.0177626	-0.0243251	-0.00731794	-0.0260297	-0.0228303	-0.019833	-0.0293295	-0.0167147	0.0212525	-0.0353394	-0.0183695	-0.0232863	-0.0406533
214.383	22.8118	-0.0407961	0.0419099	-0.0585505	0.024603	0.0410684	-0.0333444	0.0965579	-0.019333	-0.054151	0.0144928	0.0381309	0.0384732	-0.0459438	0.0230709	0.00197957	0.00488739	-0.0345966	-0.00685914	-0.00119453	-0.0452754	-0.00852278	-0.0297086	-0.0527013	-0.00196386	-0.0402881	-0.038142	0.0152458	-0.029912	-0.0231456	-0.00717665	-0.0223951	-0.00955195	-0.00728746	-0.0428588	0.00194482	-0.0189939	-0.024105	-0.00773761	-0.0274459	-0.0216442	-0.0204234	-0.0312236	-0.0162748	0.0228545	-0.0364999	-0.0180341	-0.0245951	-0.039073
217.68	22.8659	-0.0353073	0.0398621	-0.0594721	0.0284183	0.0387542	-0.033749	0.0995696	-0.0218671	-0.0520972	0.0170768	0.0364016	0.0399273	-0.0448964	0.0213752	0.00197957	0.00370911	-0.0355611	-0.00612233	-0.00195246	-0.0447553	-0.00727149	-0.0325137	-0.0516291	-0.000712795	-0.041848	-0.0377628	0.0153125	-0.0308058	-0.0208366	-0.00754997	-0.0232205	-0.00829464	-0.00755756	-0.0432969	0.00293413	-0.0202699	-0.0238706	-0.00817136	-0.0288089	-0.0204518	-0.0209794	-0.0331151	-0.0159564	0.0241392	-0.0376524	-0.0177337	-0.025923	-0.0374821
220.882	22.92	-0.0297612	0.0376905	-0.0602914	0.0320312	0.0362195	-0.0341956	0.102361	-0.0244486	-0.0499558	0.0194841	0.0347391	0.0414383	-0.0439322	0.0197965	0.00197957	0.00253857	-0.036439	-0.00543916	-0.00283661	-0.0441811	-0.00612508	-0.035228	-0.0505484	0.000511782	-0.0433179	-0.0372197	0.0153415	-0.0316431	-0.0185228	-0.00787559	-0.0240119	-0.00714854	-0.00788307	-0.0437251	0.00379301	-0.0215683	-0.0236191	-0.0086184	-0.0301051	-0.019259	-0.0215026	-0.0349659	-0.0157581	0.0251311	-0.0387707	-0.0174651	-0.027261	-0.0358805
224.143	22.974	-0.0242155	0.035405	-0.0609995	0.0354347	0.0335014	-0.0346711	0.104929	-0.027019	-0.0477213	0.0217038	0.0331474	0.0429977	-0.0430567	0.0183425	0.00197957	0.00137319	-0.0372022	-0.00480463	-0.00383358	-0.0435484	-0.00508919	-0.0378212	-0.0494636	0.00168401	-0.0446792	-0.036513	0.0153353	-0.0324302	-0.016219	-0.00815784	-0.0247538	-0.00613339	-0.00827109	-0.0441167	0.00450667	-0.0228708	-0.0233486	-0.00907781	-0.0313247	-0.0180713	-0.0219951	-0.0367407	-0.0156756	0.0258567	-0.0398298	-0.0172233	-0.0285979	-0.0342675
227.4	23.0281	-0.0187291	0.0330141	-0.0615884	0.0386225	0.0306385	-0.0351573	0.107272	-0.0295206	-0.0453883	0.0237282	0.0316283	0.0445983	-0.0422804	0.0170175	0.00197957	0.00020758	-0.0378247	-0.00421078	-0.00492689	-0.0428519	-0.00416487	-0.0402683	-0.0483781	0.00277813	-0.0459192	-0.0356475	0.0152932	-0.0331751	-0.0139399	-0.00840399	-0.0254321	-0.00526074	-0.00872729	-0.0444416	0.00506483	-0.0241627	-0.0230571	-0.00954808	-0.0324606	-0.0168932	-0.0224598	-0.0384089	-0.015702	0.0263469	-0.0408072	-0.0170013	-0.0299205	-0.032642
230.672	23.0822	-0.0133608	0.0305255	-0.0620514	0.0415883	0.0276704	-0.0356322	0.109389	-0.0318975	-0.0429521	0.0255529	0.0301824	0.046233	-0.0416187	0.015822	0.00197957	-0.000965941	-0.0382835	-0.00364833	-0.00609757	-0.0420842	-0.00334828	-0.0425478	-0.0472937	0.00376982	-0.0470313	-0.0346327	0.0152103	-0.0338878	-0.0117009	-0.00862401	-0.0260348	-0.00453397	-0.00925512	-0.0446679	0.00546232	-0.0254324	-0.0227419	-0.0100273	-0.033509	-0.0157286	-0.0228998	-0.0399444	-0.0158284	0.0266368	-0.0416838	-0.0167905	-0.0312138	-0.0310028
233.874	23.1363	-0.00816711	0.0279467	-0.0623826	0.0443278	0.0246372	-0.0360715	0.111285	-0.0340969	-0.0404089	0.0271769	0.0288099	0.0478942	-0.0410917	0.0147531	0.00197957	-0.0021575	-0.0385596	-0.00310755	-0.00732483	-0.0412373	-0.00263033	-0.0446407	-0.0462112	0.00463744	-0.0480154	-0.0334823	0.015077	-0.0345792	-0.00952074	-0.00883036	-0.0265515	-0.00394953	-0.00985511	-0.0447638	0.00569936	-0.0266707	-0.0223991	-0.0105135	-0.0344688	-0.0145807	-0.0233183	-0.0413259	-0.0160439	0.0267651	-0.0424447	-0.0165821	-0.0324624	-0.0293485
237.125	23.1903	-0.00320273	0.0252851	-0.0625761	0.0468401	0.0215786	-0.0364502	0.112963	-0.0360713	-0.037755	0.0286027	0.0275118	0.0495722	-0.0407237	0.0138035	0.00197957	-0.00337991	-0.0386391	-0.00257925	-0.00858637	-0.0403017	-0.00199809	-0.0465285	-0.0451307	0.00536329	-0.0488757	-0.0322128	0.0148786	-0.0352609	-0.00742269	-0.00903771	-0.0269734	-0.00349897	-0.0105248	-0.0446995	0.00578083	-0.0278708	-0.0220226	-0.0110047	-0.035341	-0.0134523	-0.0237194	-0.0425368	-0.016334	0.0267695	-0.0430791	-0.0163686	-0.0336516	-0.027677
240.341	23.2444	0.0014814	0.0225489	-0.0626248	0.0491271	0.018533	-0.0367435	0.114431	-0.03778	-0.0349878	0.0298351	0.0262912	0.0512559	-0.0405394	0.0129634	0.00197957	-0.00464885	-0.0385139	-0.00205621	-0.00985834	-0.0392662	-0.00143568	-0.0481954	-0.0440531	0.00593412	-0.0496187	-0.0308422	0.0145967	-0.0359434	-0.00543453	-0.00926217	-0.0272939	-0.00317027	-0.0112599	-0.0444493	0.00571536	-0.0290261	-0.0216055	-0.0114996	-0.0361296	-0.0123457	-0.0241087	-0.0435636	-0.0166805	0.0266883	-0.0435802	-0.0161458	-0.0347693	-0.0259856
243.591	23.2985	0.00583908	0.019747	-0.0625206	0.0511913	0.0155356	-0.0369259	0.115695	-0.0391913	-0.0321045	0.0308801	0.0251533	0.0529334	-0.040562	0.0122216	0.00197957	-0.00598234	-0.0381829	-0.00153365	-0.0111169	-0.0381168	-0.000926361	-0.0496296	-0.0429807	0.00634192	-0.0502515	-0.0293879	0.0142107	-0.0366352	-0.00358648	-0.00952072	-0.027509	-0.00294911	-0.0120561	-0.043993	0.0055154	-0.0301314	-0.0211406	-0.0119971	-0.0368423	-0.0112616	-0.0244942	-0.044397	-0.0170618	0.0265546	-0.043945	-0.0159123	-0.0358063	-0.0242705
246.83	23.3526	0.00983093	0.0168874	-0.0622561	0.0530352	0.0126164	-0.0369722	0.116763	-0.0402834	-0.029103	0.031745	0.0241054	0.0545931	-0.0408121	0.011567	0.00197957	-0.0073995	-0.0376516	-0.00100901	-0.0123399	-0.0368381	-0.000455354	-0.0508264	-0.0419167	0.00658371	-0.050784	-0.0278663	0.0136994	-0.0373415	-0.00190788	-0.00983017	-0.0276177	-0.00281879	-0.0129107	-0.0433154	0.00519748	-0.0311819	-0.0206212	-0.0124976	-0.0374899	-0.0101978	-0.0248848	-0.0450327	-0.0174532	0.0263953	-0.0441731	-0.0156677	-0.0367562	-0.0225278
250.129	23.4066	0.0134258	0.0139763	-0.0618261	0.0546607	0.00979859	-0.0368573	0.117641	-0.0410463	-0.0259822	0.0324381	0.0231562	0.0562259	-0.0413054	0.0109905	0.00197957	-0.00891967	-0.0369319	-0.000480658	-0.013509	-0.0354149	-1.20645e-05	-0.0517877	-0.0408652	0.00666113	-0.0512295	-0.0262947	0.0130412	-0.0380642	-0.000422984	-0.0102061	-0.0276218	-0.00276112	-0.0138214	-0.0424074	0.00478198	-0.0321735	-0.0200418	-0.0130028	-0.0380853	-0.00914977	-0.02529	-0.0454725	-0.0178288	0.0262323	-0.0442672	-0.0154109	-0.0376166	-0.0207537
253.342	23.4607	0.0166038	0.0110174	-0.0612277	0.0560698	0.00709765	-0.0365587	0.118335	-0.0414817	-0.022743	0.0329689	0.0223146	0.0578258	-0.0420506	0.0104855	0.00197957	-0.0105622	-0.036041	5.26198e-05	-0.0146104	-0.0338344	0.000410395	-0.0525207	-0.0398288	0.0065786	-0.0516047	-0.0246913	0.012215	-0.0388029	0.00085038	-0.0106614	-0.0275261	-0.00275653	-0.0147868	-0.0412651	0.00429315	-0.033102	-0.0194005	-0.0135159	-0.0386411	-0.00811247	-0.0257187	-0.0457249	-0.0181626	0.0260843	-0.0442318	-0.0151402	-0.0383892	-0.0189445
256.596	23.5148	0.0193586	0.00801333	-0.0604613	0.0572654	0.00452118	-0.0360568	0.11885	-0.0416037	-0.0193893	0.0333488	0.0215887	0.0593897	-0.0430491	0.0100469	0.00197957	-0.0123453	-0.035002	0.000592189	-0.0156351	-0.0320877	0.000816433	-0.0530362	-0.0388082	0.00634253	-0.0519286	-0.0230764	0.0112018	-0.0395565	0.00190073	-0.0112058	-0.0273382	-0.00278407	-0.0158047	-0.0398919	0.00375723	-0.0339647	-0.0186995	-0.01404	-0.039168	-0.00708081	-0.0261781	-0.0458036	-0.0184297	0.0259654	-0.0440733	-0.014854	-0.0390796	-0.0170973
259.793	23.5689	0.0216988	0.0049666	-0.0595287	0.0582515	0.00206984	-0.0353371	0.119191	-0.0414379	-0.0159299	0.0335909	0.0209862	0.0609176	-0.0442944	0.00966983	0.00197957	-0.0142853	-0.0338432	0.0011393	-0.016579	-0.030171	0.00120877	-0.0533479	-0.0378026	0.00596102	-0.0522195	-0.0214715	0.00998659	-0.0403236	0.00272244	-0.0118463	-0.0270681	-0.00282222	-0.0168714	-0.0382994	0.00320017	-0.0347613	-0.017945	-0.0145764	-0.039673	-0.00605131	-0.0266731	-0.0457271	-0.0186075	0.0258854	-0.0438011	-0.0145522	-0.0396956	-0.0152095
263.012	23.6229	0.0236458	0.00188108	-0.0584333	0.0590337	-0.000261298	-0.0343895	0.11936	-0.0410191	-0.0123787	0.0337098	0.020514	0.0624123	-0.0457737	0.00935006	0.00197957	-0.0163949	-0.0325974	0.00169365	-0.0174432	-0.0280866	0.00158881	-0.0534727	-0.0368093	0.00544316	-0.0524933	-0.0198978	0.0085602	-0.0411028	0.00331429	-0.0125865	-0.0267276	-0.00284964	-0.0179808	-0.0365074	0.00264372	-0.0354967	-0.0171461	-0.0151246	-0.0401601	-0.00502372	-0.0272055	-0.0455176	-0.0186774	0.02585	-0.0434273	-0.0142385	-0.0402455	-0.0132791
266.267	23.677	0.0252313	-0.00123741	-0.0571805	0.0596177	-0.0024802	-0.0332103	0.119356	-0.0403894	-0.00875368	0.03372	0.0201785	0.0638785	-0.0474692	0.00908598	0.00197957	-0.0186806	-0.0313003	0.00225288	-0.0182342	-0.0258434	0.00195598	-0.0534301	-0.0358263	0.00479858	-0.0527617	-0.0183751	0.0069202	-0.0418914	0.0036798	-0.0134268	-0.0263296	-0.00284695	-0.0191246	-0.034544	0.00210415	-0.0361815	-0.0163131	-0.015681	-0.0406307	-0.00400255	-0.0277741	-0.0451987	-0.0186262	0.025864	-0.042968	-0.0139202	-0.0407374	-0.0113048
269.535	23.7311	0.0264936	-0.00438014	-0.055779	0.0600104	-0.00459625	-0.0318022	0.119179	-0.0395955	-0.00507499	0.0336349	0.0199855	0.0653206	-0.0493602	0.00887791	0.00197957	-0.0211424	-0.0299899	0.00281216	-0.0189617	-0.0234563	0.00230717	-0.0532433	-0.0348532	0.0040377	-0.0530314	-0.016922	0.00507086	-0.0426865	0.00382655	-0.0143659	-0.0258863	-0.00279809	-0.0202927	-0.0324431	0.00159267	-0.0368327	-0.0154569	-0.016242	-0.0410842	-0.00299777	-0.0283746	-0.0447936	-0.0184473	0.0259264	-0.0424424	-0.0136078	-0.041177	-0.00928618
272.776	23.7851	0.0274734	-0.00753504	-0.0542411	0.0602182	-0.0066195	-0.0301744	0.118825	-0.0386854	-0.0013634	0.0334657	0.0199391	0.0667428	-0.0514236	0.00872874	0.00197957	-0.0237731	-0.0287042	0.00336519	-0.0196359	-0.0209446	0.00263605	-0.0529397	-0.0338913	0.00317283	-0.0533036	-0.0155561	0.00302322	-0.0434834	0.00376835	-0.0154003	-0.0254083	-0.00269275	-0.0214743	-0.0302431	0.00111655	-0.0374709	-0.01459	-0.0168048	-0.0415201	-0.00202342	-0.0290004	-0.0443235	-0.0181434	0.0260322	-0.0418707	-0.0133143	-0.0415674	-0.00722382
275.998	23.8392	0.0282109	-0.0106865	-0.0525821	0.0602457	-0.00856053	-0.0283426	0.118288	-0.0377062	0.00236037	0.0332202	0.0200422	0.0681481	-0.0536341	0.00864454	0.00197957	-0.026559	-0.0274797	0.00390412	-0.0202651	-0.018333	0.00293263	-0.0525504	-0.0329437	0.00221828	-0.0535735	-0.0142942	0.000792404	-0.0442752	0.00352552	-0.0165245	-0.0249036	-0.00252684	-0.0226591	-0.0279851	0.000679768	-0.0381174	-0.0137278	-0.017369	-0.0419371	-0.00109654	-0.0296436	-0.043806	-0.0177268	0.0261692	-0.0412725	-0.0130531	-0.0419092	-0.00511915
279.301	23.8933	0.0287423	-0.0138173	-0.0508208	0.0600942	-0.0104302	-0.0263275	0.117561	-0.0367018	0.00607549	0.0329037	0.020295	0.0695384	-0.0559639	0.00863578	0.00197957	-0.0294803	-0.0263489	0.0044202	-0.0208545	-0.0156506	0.00318273	-0.0521076	-0.032014	0.00119004	-0.0538314	-0.0131541	-0.00160349	-0.0450538	0.00312464	-0.0177313	-0.0243777	-0.00230279	-0.0238386	-0.0257107	0.000283183	-0.0387914	-0.0128886	-0.0179363	-0.0423332	-0.00023489	-0.0302961	-0.0432551	-0.0172184	0.0263172	-0.040665	-0.0128362	-0.0422013	-0.00297477
282.592	23.9474	0.029098	-0.0169092	-0.048979	0.0597598	-0.0122399	-0.0241545	0.116636	-0.0357112	0.0097612	0.0325191	0.0206949	0.0709138	-0.0583837	0.00871709	0.00197957	-0.032512	-0.0253376	0.00490338	-0.0214062	-0.0129295	0.00336945	-0.0516434	-0.0311058	0.000104426	-0.0540643	-0.0121536	-0.00414466	-0.045809	0.00259678	-0.0190121	-0.0238347	-0.00202875	-0.0250056	-0.0234593	-7.57752e-05	-0.0395086	-0.0120944	-0.0185118	-0.0427059	0.00054484	-0.0309505	-0.0426807	-0.0166456	0.0264487	-0.0400621	-0.0126742	-0.0424428	-0.00079436
285.785	24.0014	0.0293022	-0.0199439	-0.0470806	0.0592317	-0.0140008	-0.0218531	0.115504	-0.0347664	0.0133968	0.0320676	0.0212372	0.0722728	-0.0608622	0.00890593	0.00197957	-0.0356248	-0.0244636	0.0053411	-0.0219192	-0.0102029	0.00347407	-0.0511859	-0.0302224	-0.00102347	-0.0542569	-0.0113105	-0.00681014	-0.0465289	0.00197477	-0.0203579	-0.0232781	-0.00171688	-0.0261534	-0.0212655	-0.00040372	-0.0402803	-0.0113695	-0.0191021	-0.0430514	0.0012285	-0.0316014	-0.04209	-0.0160397	0.0265305	-0.0394734	-0.0125761	-0.0426324	0.00141768
288.965	24.0555	0.0293732	-0.022903	-0.0451498	0.0584927	-0.0157236	-0.0194555	0.114154	-0.0338912	0.0169617	0.0315484	0.0219157	0.0736117	-0.0633679	0.00922091	0.00197957	-0.0387856	-0.0237368	0.00571771	-0.0223909	-0.00750328	0.00347814	-0.0507572	-0.0293668	-0.00218198	-0.0543933	-0.0106392	-0.00957754	-0.047201	0.00129047	-0.0217594	-0.0227116	-0.00138207	-0.0272752	-0.0191584	-0.000710625	-0.0411134	-0.0107385	-0.0197142	-0.0433648	0.00180536	-0.032246	-0.0414868	-0.0154343	0.0265275	-0.0389049	-0.012549	-0.0427697	0.00365631
292.198	24.1096	0.0293259	-0.0257671	-0.0432085	0.0575202	-0.0174175	-0.0169955	0.112578	-0.0331013	0.0204352	0.0309586	0.0227245	0.0749249	-0.0658702	0.00968091	0.00197957	-0.041958	-0.023159	0.00601487	-0.022818	-0.00486031	0.00336465	-0.0503716	-0.0285409	-0.00336293	-0.0544566	-0.0101497	-0.0124238	-0.0478118	0.000573299	-0.0232068	-0.0221379	-0.0010411	-0.0283653	-0.0171614	-0.00101007	-0.0420099	-0.0102237	-0.0203538	-0.0436396	0.00226819	-0.0328832	-0.0408723	-0.0148617	0.0264043	-0.0383605	-0.0125982	-0.0428543	0.00591583
295.406	24.1637	0.0291736	-0.0285162	-0.041275	0.0562891	-0.0190899	-0.0145073	0.110764	-0.0324047	0.0237967	0.0302932	0.0236587	0.0762041	-0.0683398	0.0103047	0.00197957	-0.0451034	-0.022726	0.00621245	-0.0231983	-0.00229878	0.00311918	-0.0500357	-0.0277457	-0.00455982	-0.0544286	-0.00984604	-0.0153259	-0.0483486	-0.000151456	-0.0246885	-0.0215586	-0.00071209	-0.0294201	-0.0152926	-0.00131908	-0.0429677	-0.0098414	-0.0210251	-0.0438685	0.0026133	-0.0335112	-0.0402454	-0.0143518	0.0261286	-0.037844	-0.0127289	-0.042886	0.00818991
298.68	24.2177	0.0289276	-0.0311298	-0.0393612	0.0547741	-0.0207464	-0.0120244	0.108705	-0.0318027	0.0270257	0.029547	0.0247134	0.0774383	-0.0707482	0.011111	0.00197957	-0.0481826	-0.0224277	0.00628961	-0.0235302	0.000162693	0.00272947	-0.0497491	-0.0269816	-0.00576607	-0.0542884	-0.00972522	-0.0182612	-0.0487986	-0.000863825	-0.0261916	-0.0209749	-0.000414206	-0.0304382	-0.0135658	-0.00165749	-0.0439813	-0.00960015	-0.0217319	-0.0440441	0.00283969	-0.0341276	-0.0396034	-0.01393	0.0256712	-0.0373598	-0.0129462	-0.0428641	0.0104716
301.931	24.2718	0.0285969	-0.0335869	-0.0374723	0.0529534	-0.0223897	-0.00957773	0.106393	-0.0312912	0.0301034	0.0287158	0.0258835	0.0786142	-0.0730696	0.012119	0.00197957	-0.0511573	-0.0222497	0.00622555	-0.0238132	0.00251173	0.00218443	-0.0495063	-0.0262489	-0.00697341	-0.0540134	-0.00977676	-0.0212074	-0.0491488	-0.00154932	-0.027701	-0.0203872	-0.000167406	-0.0314204	-0.0119914	-0.0020464	-0.0450419	-0.00950213	-0.0224786	-0.0441587	0.00294953	-0.0347296	-0.0389433	-0.0136168	0.0250037	-0.0369124	-0.013255	-0.0427865	0.0127536
305.174	24.3259	0.028185	-0.0358666	-0.0356065	0.0508077	-0.0240201	-0.00719519	0.103826	-0.0308614	0.0330124	0.0277965	0.027163	0.0797167	-0.0752807	0.013347	0.00197957	-0.053992	-0.0221726	0.00600055	-0.0240472	0.00474099	0.00147324	-0.0492987	-0.0255478	-0.00817182	-0.0535815	-0.00998257	-0.0241432	-0.0493841	-0.00219833	-0.0292003	-0.0197951	8.0453e-06	-0.0323692	-0.0105761	-0.00250651	-0.0461379	-0.00954381	-0.0232704	-0.0442057	0.00294899	-0.0353161	-0.0382622	-0.0134279	0.0240957	-0.0365054	-0.0136588	-0.0426497	0.0150277
308.371	24.38	0.0276889	-0.0379504	-0.033757	0.048321	-0.0256364	-0.00489982	0.101009	-0.0305009	0.0357384	0.0267878	0.0285443	0.0807305	-0.0773624	0.0148114	0.00197957	-0.0566542	-0.0221715	0.0055973	-0.0242343	0.00684674	0.000585145	-0.0491158	-0.0248786	-0.00935072	-0.0529742	-0.0103189	-0.0270482	-0.0494875	-0.00280374	-0.0306727	-0.0191988	9.16157e-05	-0.0332879	-0.00932251	-0.0030562	-0.0472556	-0.00971713	-0.024113	-0.0441797	0.00284824	-0.0358891	-0.0375581	-0.0133745	0.0229161	-0.0361402	-0.0141579	-0.04245	0.0172855
311.669	24.434	0.027099	-0.0398238	-0.0319145	0.0454815	-0.0272376	-0.00270922	0.0979516	-0.0301941	0.0382693	0.0256902	0.0300183	0.0816397	-0.0792993	0.0165244	0.00197957	-0.0591145	-0.0222165	0.00500267	-0.0243787	0.0088276	-0.00048978	-0.0489449	-0.0242414	-0.010501	-0.0521804	-0.0107581	-0.0299031	-0.0494411	-0.00336019	-0.0321017	-0.0185987	6.30983e-05	-0.0341799	-0.00822895	-0.00370905	-0.0483794	-0.0100107	-0.025012	-0.0440763	0.00266134	-0.0364532	-0.0368311	-0.0134631	0.0214344	-0.0358144	-0.0147481	-0.0421855	0.0195183
314.937	24.4881	0.0264007	-0.041477	-0.0300694	0.0422822	-0.0288243	-0.000634125	0.0946707	-0.0299238	0.0405971	0.0245066	0.0315739	0.0824296	-0.0810803	0.0184926	0.00197957	-0.0613475	-0.0222736	0.00420967	-0.0244866	0.0106844	-0.00175855	-0.0487709	-0.0236347	-0.0116169	-0.0511972	-0.0112722	-0.0326899	-0.0492274	-0.0038637	-0.0334722	-0.0179952	-9.60377e-05	-0.0350477	-0.00728959	-0.00447325	-0.0494916	-0.0104101	-0.0259706	-0.0438918	0.00240563	-0.0370145	-0.0360843	-0.0136943	0.0196214	-0.0355222	-0.0154218	-0.0418558	0.0217169
318.232	24.5422	0.0255771	-0.0429066	-0.028212	0.0387215	-0.0303995	0.00132116	0.0911896	-0.0296724	0.0427179	0.0232414	0.0331991	0.0830879	-0.0826991	0.0207149	0.00197957	-0.0633316	-0.0223078	0.00321756	-0.0245665	0.0124208	-0.00322362	-0.0485757	-0.0230558	-0.0126957	-0.0500292	-0.0118328	-0.0353915	-0.0488315	-0.00431285	-0.0347714	-0.0173899	-0.000402154	-0.0358937	-0.0064951	-0.00535237	-0.0505737	-0.010897	-0.0269869	-0.0436238	0.00210041	-0.0375798	-0.0353237	-0.0140625	0.0174518	-0.0352545	-0.0161683	-0.0414625	0.0238722
321.497	24.5963	0.0246099	-0.0441137	-0.0263331	0.0348048	-0.0319679	0.0031573	0.0875353	-0.0294239	0.0446323	0.0219004	0.0348823	0.0836051	-0.0841541	0.0231818	0.00197957	-0.0650515	-0.0222861	0.00203063	-0.0246284	0.0140428	-0.00488168	-0.0483398	-0.0224994	-0.0137375	-0.0486856	-0.0124115	-0.0379943	-0.0482422	-0.00470994	-0.0359877	-0.0167845	-0.000867951	-0.0367205	-0.00583449	-0.00634767	-0.0516086	-0.011449	-0.0280531	-0.0432726	0.00176515	-0.0381545	-0.0345581	-0.0145566	0.0149077	-0.0350015	-0.0169756	-0.0410073	0.0259749
324.728	24.6503	0.02348	-0.0451044	-0.0244235	0.0305456	-0.0335337	0.00487828	0.0837374	-0.0291643	0.0463446	0.0204889	0.0366121	0.0839748	-0.0854484	0.0258765	0.00197957	-0.0664991	-0.0221797	0.000656937	-0.0246838	0.0155597	-0.00672421	-0.0480459	-0.0219596	-0.014743	-0.0471795	-0.0129805	-0.0404869	-0.0474525	-0.00506054	-0.0371106	-0.0161813	-0.00150128	-0.0375314	-0.00529704	-0.00745951	-0.0525803	-0.0120408	-0.0291551	-0.0428417	0.00141838	-0.0387423	-0.0337985	-0.0151604	0.0119798	-0.0347541	-0.0178313	-0.0404904	0.0280159
327.923	24.7044	0.022168	-0.0458891	-0.0224757	0.025966	-0.0350998	0.0064903	0.0798271	-0.0288811	0.0478628	0.0190118	0.0383773	0.0841928	-0.0865891	0.0287752	0.00197957	-0.0676728	-0.0219667	-0.000892452	-0.0247444	0.0169817	-0.00873834	-0.0476798	-0.0214311	-0.0157127	-0.045527	-0.0135148	-0.0428601	-0.04646	-0.00537311	-0.0381316	-0.0155825	-0.00230417	-0.0383284	-0.00487325	-0.00868671	-0.0534747	-0.0126469	-0.0302754	-0.0423382	0.00107665	-0.0393448	-0.0330567	-0.0158554	0.00866703	-0.0345056	-0.0187225	-0.03991	0.0299865
331.206	24.7585	0.0206542	-0.0464811	-0.0204839	0.0210969	-0.0366669	0.00799955	0.0758376	-0.0285637	0.0491985	0.017474	0.040166	0.0842571	-0.0875868	0.0318483	0.00197957	-0.0685772	-0.0216327	-0.00260313	-0.0248218	0.0183193	-0.010908	-0.0472316	-0.0209107	-0.0166454	-0.0437488	-0.0139941	-0.0451063	-0.0452669	-0.0056565	-0.0390455	-0.0149906	-0.00327371	-0.0391114	-0.00455513	-0.0100257	-0.0542795	-0.0132439	-0.0313957	-0.041772	0.000753292	-0.0399614	-0.032344	-0.0166225	0.0049754	-0.0342523	-0.0196348	-0.0392618	0.0318782
334.427	24.8125	0.0189194	-0.0468965	-0.0184446	0.0159771	-0.0382333	0.00941124	0.0718044	-0.0282018	0.0503668	0.0158812	0.0419659	0.0841679	-0.0884532	0.0350617	0.00197957	-0.069221	-0.0211705	-0.00445693	-0.0249261	0.01958	-0.0132138	-0.046695	-0.0203982	-0.0175383	-0.0418705	-0.0144051	-0.04722	-0.0438791	-0.00591847	-0.0398493	-0.0144081	-0.00440274	-0.0398773	-0.00433573	-0.0114692	-0.0549845	-0.0138124	-0.0324995	-0.0411547	0.000457589	-0.0405887	-0.0316714	-0.0174449	0.00091758	-0.0339929	-0.0205523	-0.0385398	0.0336831
337.667	24.8666	0.0169446	-0.0471545	-0.0163587	0.0106514	-0.0397946	0.0107288	0.0677645	-0.0277853	0.0513859	0.014241	0.0437639	0.0839274	-0.0891989	0.0383777	0.00197957	-0.0696172	-0.0205797	-0.00643177	-0.0250648	0.020767	-0.0156332	-0.0460661	-0.019895	-0.0183868	-0.0399226	-0.0147426	-0.0491984	-0.0423069	-0.00616569	-0.0405418	-0.013837	-0.00568127	-0.0406208	-0.00420914	-0.0130051	-0.0555804	-0.0143371	-0.0335744	-0.0404992	0.000194678	-0.0412207	-0.0310499	-0.0183081	-0.00348773	-0.0337279	-0.0214578	-0.0377365	0.0353943
340.875	24.9207	0.0147109	-0.0472769	-0.0142321	0.00516826	-0.0413436	0.0119533	0.0637552	-0.027304	0.0522753	0.0125629	0.0455468	0.0835406	-0.089833	0.0417568	0.00197957	-0.0697827	-0.0198648	-0.00850276	-0.0252426	0.021879	-0.018139	-0.0453434	-0.0194041	-0.0191855	-0.0379391	-0.0150099	-0.0510419	-0.0405646	-0.00640539	-0.0411238	-0.0132796	-0.00709683	-0.041334	-0.00416987	-0.0146182	-0.0560587	-0.0148075	-0.0346111	-0.0398196	-3.4421e-05	-0.0418492	-0.0304895	-0.0192003	-0.0082142	-0.0334587	-0.022334	-0.0368454	0.0370053
344.127	24.9748	0.0122003	-0.0472872	-0.0120765	-0.000421469	-0.0428708	0.0130825	0.0598119	-0.0267476	0.053055	0.010859	0.0473019	0.0830152	-0.0903607	0.0451569	0.00197957	-0.0697371	-0.0190352	-0.0106443	-0.0254605	0.0229104	-0.0206997	-0.0445283	-0.01893	-0.0199279	-0.0359545	-0.015218	-0.0527527	-0.0386711	-0.00664752	-0.0415985	-0.0127388	-0.00863446	-0.0420058	-0.00421215	-0.0162914	-0.0564125	-0.0152172	-0.0356023	-0.0391308	-0.000232337	-0.0424657	-0.0299997	-0.0201109	-0.0132276	-0.0331866	-0.0231651	-0.0358624	0.0385108
347.356	25.0288	0.00939625	-0.0472082	-0.00990996	-0.00606679	-0.0443644	0.0141104	0.0559665	-0.0261064	0.0537442	0.0091431	0.0490171	0.0823607	-0.090785	0.0485361	0.00197957	-0.0695012	-0.0181047	-0.012832	-0.025716	0.0238523	-0.0232791	-0.0436231	-0.0184798	-0.0206094	-0.0340017	-0.0153839	-0.0543344	-0.0366502	-0.00690575	-0.0419722	-0.0122172	-0.0102772	-0.0426215	-0.00432966	-0.0180072	-0.0566361	-0.0155631	-0.0365414	-0.0384465	-0.000404995	-0.0430621	-0.0295884	-0.0210299	-0.0184835	-0.0329122	-0.0239371	-0.0347875	0.0399062
350.638	25.0829	0.00628599	-0.0470597	-0.00775567	-0.0117186	-0.0458096	0.0150273	0.0522462	-0.0253718	0.0543611	0.00743029	0.050682	0.0815872	-0.0911066	0.0518533	0.00197957	-0.069096	-0.0170917	-0.0150435	-0.0260041	0.0246947	-0.0258378	-0.0426311	-0.0180629	-0.0212273	-0.0321097	-0.0155288	-0.0557906	-0.0345302	-0.00719614	-0.0422535	-0.0117163	-0.0120081	-0.0431644	-0.00451534	-0.0197479	-0.0567252	-0.0158439	-0.0374215	-0.0377792	-0.0005617	-0.0436302	-0.0292611	-0.0219489	-0.0239287	-0.0326359	-0.0246395	-0.0336249	0.0411879
353.909	25.137	0.00286283	-0.0468566	-0.00564092	-0.0173304	-0.0471898	0.0158192	0.0486728	-0.0245359	0.054922	0.00573592	0.0522889	0.0807043	-0.0913247	0.0550701	0.00197957	-0.0685414	-0.0160181	-0.0172593	-0.0263165	0.0254284	-0.0283354	-0.041556	-0.0176907	-0.021781	-0.0303013	-0.015677	-0.0571254	-0.0323428	-0.007536	-0.0424509	-0.0112365	-0.0138109	-0.0436175	-0.00476037	-0.0214965	-0.0566762	-0.01606	-0.0382368	-0.0371404	-0.000715142	-0.0441598	-0.0290196	-0.0228613	-0.0295007	-0.0323578	-0.0252654	-0.0323822	0.0423532
357.171	25.1911	-0.000872151	-0.0466064	-0.00359556	-0.0228579	-0.0484858	0.0164686	0.0452611	-0.0235926	0.0554403	0.00407448	0.0538335	0.0797202	-0.0914374	0.0581514	0.00197957	-0.0678549	-0.0149084	-0.0194618	-0.0266423	0.026046	-0.0307333	-0.0404024	-0.0173754	-0.0222713	-0.0285908	-0.0158552	-0.0583457	-0.0301222	-0.0079428	-0.0425717	-0.0107766	-0.0156708	-0.0439646	-0.00505434	-0.0232373	-0.0564856	-0.0162133	-0.0389829	-0.0365415	-0.000880734	-0.0446395	-0.0288613	-0.0237643	-0.0351306	-0.0320781	-0.025812	-0.0310694	0.0434005
360.389	25.2451	-0.00490972	-0.0463088	-0.00164996	-0.02826	-0.0496765	0.0169557	0.0420189	-0.0225374	0.0559252	0.00245892	0.0553144	0.0786413	-0.0914406	0.0610688	0.00197957	-0.0670524	-0.0137888	-0.0216352	-0.0269673	0.0265423	-0.0329967	-0.0391754	-0.0171296	-0.0226986	-0.0269835	-0.0160918	-0.0594596	-0.0279037	-0.00843343	-0.0426219	-0.0103345	-0.0175753	-0.0441915	-0.00538496	-0.0249554	-0.0561493	-0.0163077	-0.0396578	-0.0359918	-0.00107523	-0.0450575	-0.0287792	-0.0246591	-0.040744	-0.0317971	-0.0262801	-0.0296984	0.0443296
363.619	25.2992	-0.00923351	-0.0459557	0.000167374	-0.0335007	-0.0507382	0.0172605	0.0389477	-0.021368	0.0563809	0.000900131	0.0567326	0.0774729	-0.0913283	0.0638003	0.00197957	-0.0661491	-0.0126861	-0.0237658	-0.0272743	0.0269139	-0.0350951	-0.0378811	-0.0169656	-0.023064	-0.0254765	-0.0164148	-0.060477	-0.0257216	-0.00902313	-0.0426068	-0.00990836	-0.0195146	-0.0442859	-0.00573836	-0.0266378	-0.0556629	-0.0163493	-0.0402621	-0.0354984	-0.00131453	-0.045403	-0.0287623	-0.0255512	-0.0462648	-0.0315151	-0.0266724	-0.0282826	0.0451419
366.832	25.3533	-0.0138217	-0.0455324	0.00183199	-0.0385487	-0.0516457	0.0173644	0.036043	-0.0200843	0.056806	-0.000592876	0.0580915	0.0762196	-0.0910933	0.0663311	0.00197957	-0.0651604	-0.0116257	-0.0258429	-0.0275437	0.0271581	-0.0370031	-0.0365262	-0.016895	-0.0233697	-0.0240601	-0.0168504	-0.0614077	-0.0236068	-0.00972469	-0.0425314	-0.00949917	-0.0214802	-0.0442371	-0.00609949	-0.028273	-0.0550226	-0.0163453	-0.0407981	-0.0350645	-0.00161185	-0.045668	-0.028798	-0.0264491	-0.0516162	-0.0312314	-0.026995	-0.0268384	0.0458402
370.102	25.4074	-0.0186477	-0.045019	0.00332479	-0.0433783	-0.0523732	0.0172523	0.0332962	-0.0186884	0.0571937	-0.00201278	0.0593967	0.0748845	-0.0907281	0.0686522	0.00197957	-0.0641011	-0.010629	-0.0278587	-0.027755	0.0272714	-0.0387009	-0.0351166	-0.016927	-0.02362	-0.0227205	-0.0174211	-0.0622611	-0.0215851	-0.0105489	-0.042401	-0.00911153	-0.0234643	-0.0440355	-0.00645271	-0.0298515	-0.0542269	-0.0163042	-0.04127	-0.0346883	-0.0019757	-0.0458465	-0.0288721	-0.0273611	-0.0567228	-0.0309444	-0.0272561	-0.0253857	0.0464284
373.365	25.4614	-0.0236817	-0.0443926	0.00463292	-0.0479682	-0.052896	0.0169146	0.0306952	-0.0171841	0.0575309	-0.00335416	0.0606559	0.0734703	-0.090227	0.0707607	0.00197957	-0.0629852	-0.009711	-0.0298079	-0.0278873	0.0272487	-0.0401738	-0.0336562	-0.0170675	-0.0238226	-0.0214422	-0.0181447	-0.0630444	-0.0196748	-0.0115047	-0.0422215	-0.00875372	-0.0254584	-0.0436728	-0.00678299	-0.0313659	-0.0532774	-0.0162356	-0.0416829	-0.0343624	-0.00240897	-0.045935	-0.0289702	-0.0282918	-0.0615095	-0.0306521	-0.0274666	-0.0239486	0.0469111
376.602	25.5155	-0.0288913	-0.043629	0.00575074	-0.0523016	-0.053192	0.0163482	0.0282256	-0.0155754	0.0577991	-0.00461441	0.0618784	0.0719788	-0.0895867	0.0726592	0.00197957	-0.0618244	-0.00887933	-0.0316874	-0.0279225	0.0270836	-0.0414129	-0.0321453	-0.0173196	-0.0239883	-0.020209	-0.0190315	-0.063762	-0.0178872	-0.0126001	-0.042	-0.00843679	-0.0274537	-0.0431432	-0.00707679	-0.0328113	-0.0521796	-0.0161481	-0.0420411	-0.0340763	-0.00291008	-0.0459324	-0.0290762	-0.02924	-0.0659055	-0.0303509	-0.0276399	-0.0225531	0.0472932
379.772	25.5696	-0.0342419	-0.0427052	0.00668059	-0.0563659	-0.0532447	0.0155568	0.0258713	-0.0138673	0.0579761	-0.00579376	0.0630754	0.0704125	-0.0888079	0.0743558	0.00197957	-0.0606291	-0.00813457	-0.0334961	-0.027846	0.0267703	-0.0424151	-0.0305815	-0.0176847	-0.0241305	-0.0190045	-0.0200816	-0.0644159	-0.0162269	-0.0138423	-0.0417429	-0.00817297	-0.0294402	-0.042445	-0.00732275	-0.0341851	-0.0509421	-0.0160486	-0.0423472	-0.033818	-0.00347503	-0.0458399	-0.029172	-0.0301975	-0.0698449	-0.0300367	-0.0277913	-0.0212262	0.0475793
383.03	25.6236	-0.0396973	-0.0416003	0.00743255	-0.0601526	-0.0530429	0.0145511	0.0236147	-0.0120665	0.0580387	-0.00689448	0.0642595	0.068774	-0.0878947	0.075862	0.00197957	-0.0594094	-0.00747169	-0.0352345	-0.027648	0.0263048	-0.0431853	-0.0289624	-0.018164	-0.024263	-0.017811	-0.0212839	-0.0650075	-0.0146931	-0.0152372	-0.0414545	-0.00797326	-0.0314069	-0.0415813	-0.00751253	-0.035488	-0.0495757	-0.0159426	-0.0426022	-0.033576	-0.00409906	-0.0456603	-0.0292379	-0.0311506	-0.073272	-0.0297048	-0.0279376	-0.0199927	0.047774
386.3	25.6777	-0.0452193	-0.0402981	0.00802324	-0.0636576	-0.0525817	0.0133481	0.0214373	-0.0101824	0.0579648	-0.0079204	0.0654437	0.0670656	-0.0868548	0.0771931	0.00197957	-0.0581749	-0.00688198	-0.0369037	-0.0273232	0.0256875	-0.0437361	-0.0272869	-0.0187592	-0.0243988	-0.0166112	-0.0226186	-0.0655383	-0.0132807	-0.0167871	-0.0411371	-0.0078467	-0.0333412	-0.0405598	-0.00764154	-0.0367236	-0.048092	-0.0158359	-0.042806	-0.0333397	-0.00477755	-0.0453977	-0.0292537	-0.0320813	-0.0761432	-0.0293499	-0.0280962	-0.0188743	0.0478818
389.556	25.7318	-0.0507679	-0.0387872	0.00847397	-0.0668806	-0.051862	0.0119687	0.0193204	-0.00822766	0.0577348	-0.00887634	0.066638	0.0652888	-0.0856978	0.078367	0.00197957	-0.0569356	-0.00635578	-0.0385052	-0.0268715	0.0249241	-0.0440882	-0.0255552	-0.0194722	-0.0245487	-0.01539	-0.02406	-0.0660101	-0.0119816	-0.0184871	-0.0407918	-0.00780157	-0.0352303	-0.0393924	-0.00770852	-0.037897	-0.0465031	-0.0157349	-0.0429579	-0.033099	-0.00550571	-0.0450568	-0.0292005	-0.03297	-0.0784296	-0.0289664	-0.0282841	-0.0178888	0.0479076
392.731	25.7859	-0.0563005	-0.0370618	0.00880887	-0.0698234	-0.0508898	0.0104359	0.0172472	-0.00621803	0.0573331	-0.0097667	0.0678491	0.0634461	-0.0844342	0.0794044	0.00197957	-0.055701	-0.0058843	-0.0400399	-0.0262979	0.0240245	-0.0442683	-0.0237688	-0.0203044	-0.0247213	-0.0141366	-0.0255801	-0.0664247	-0.0107861	-0.0203235	-0.0404199	-0.00784656	-0.0370627	-0.0380943	-0.00771495	-0.0390134	-0.0448219	-0.0156477	-0.0430571	-0.0328441	-0.00627746	-0.0446411	-0.0290612	-0.0337971	-0.0801138	-0.0285489	-0.028517	-0.0170508	0.0478561
396.004	25.8399	-0.0617725	-0.0351213	0.00905382	-0.0724882	-0.0496735	0.00877319	0.0152051	-0.0041723	0.0567479	-0.0105946	0.0690788	0.0615417	-0.0830742	0.0803274	0.00197957	-0.0544798	-0.00546101	-0.0415072	-0.0256133	0.0230009	-0.0443085	-0.0219291	-0.0212543	-0.0249222	-0.0128465	-0.02715	-0.0667823	-0.00968362	-0.0222732	-0.0400238	-0.00799085	-0.0388289	-0.0366843	-0.00766516	-0.0400775	-0.0430633	-0.0155838	-0.0431041	-0.0325651	-0.00708473	-0.0441534	-0.0288232	-0.0345441	-0.0811904	-0.0280934	-0.0288066	-0.0163719	0.0477317
399.301	25.894	-0.0671369	-0.0329695	0.00923544	-0.0748764	-0.0482241	0.00700432	0.0131875	-0.0021111	0.0559708	-0.0113613	0.0703231	0.0595824	-0.081628	0.0811575	0.00197957	-0.0532769	-0.0050816	-0.0429041	-0.0248351	0.0218645	-0.0442433	-0.0200371	-0.0223162	-0.0251541	-0.0115219	-0.028742	-0.0670798	-0.00866431	-0.0243047	-0.0396072	-0.0082435	-0.0405206	-0.0351832	-0.00756694	-0.0410932	-0.0412452	-0.0155533	-0.0431002	-0.032252	-0.00791773	-0.0435956	-0.0284794	-0.0351946	-0.0816631	-0.0275984	-0.0291602	-0.0158626	0.0475379
402.582	25.9481	-0.072346	-0.0306146	0.00937924	-0.0769884	-0.0465548	0.00515218	0.011195	-5.60301e-05	0.0549962	-0.0120664	0.0715727	0.0575781	-0.0801048	0.0819146	0.00197958	-0.0520927	-0.00474461	-0.0442249	-0.0239872	0.0206231	-0.0441072	-0.018095	-0.0234799	-0.0254163	-0.0101712	-0.0303302	-0.0673089	-0.00771933	-0.0263811	-0.0391753	-0.00861253	-0.04213	-0.0336119	-0.00743178	-0.0420642	-0.0393897	-0.0155661	-0.0430469	-0.0318942	-0.0087669	-0.04297	-0.0280292	-0.0357335	-0.0815425	-0.0270656	-0.0295797	-0.0155314	0.0472778
405.8	26.0022	-0.077353	-0.0280686	0.00950731	-0.078824	-0.0446807	0.00323869	0.00923481	0.00197186	0.0538225	-0.012707	0.0728127	0.055542	-0.0785136	0.0826168	0.0019796	-0.050922	-0.00445198	-0.0454618	-0.0230989	0.0192802	-0.0439311	-0.0161067	-0.0247314	-0.025707	-0.0088077	-0.0318909	-0.0674545	-0.00684146	-0.0284625	-0.0387345	-0.00910327	-0.0436485	-0.0319905	-0.00727463	-0.0429934	-0.0375237	-0.0156309	-0.0429445	-0.0314808	-0.00962449	-0.0422805	-0.0274787	-0.0361487	-0.0808423	-0.0265004	-0.0300629	-0.0153849	0.0469541
409.034	26.0562	-0.082114	-0.025346	0.00963603	-0.0803825	-0.0426191	0.00128441	0.0073204	0.00395289	0.0524521	-0.0132783	0.074024	0.0534899	-0.0768635	0.0832803	0.00197966	-0.0497538	-0.00420938	-0.0466059	-0.0222019	0.0178344	-0.04374	-0.014081	-0.026054	-0.0260239	-0.00744793	-0.0334033	-0.0674951	-0.00602532	-0.0305087	-0.0382922	-0.00971729	-0.045067	-0.0303384	-0.00711338	-0.043882	-0.0356792	-0.0157538	-0.0427921	-0.0310018	-0.0104856	-0.0415323	-0.0268393	-0.0364315	-0.0795799	-0.025912	-0.0306036	-0.0154266	0.0465689
412.199	26.1103	-0.0865891	-0.0224623	0.00977443	-0.0816653	-0.0403897	-0.000692942	0.00547141	0.00586967	0.0508926	-0.0137735	0.0751853	0.0514392	-0.0751644	0.0839178	0.00197981	-0.0485725	-0.00402623	-0.0476486	-0.0213281	0.0162814	-0.0435514	-0.0120319	-0.02743	-0.0263648	-0.00611027	-0.0348491	-0.0674046	-0.00526755	-0.0324809	-0.0378548	-0.010452	-0.0463752	-0.0286741	-0.00696715	-0.0447287	-0.0338911	-0.0159393	-0.0425863	-0.03045	-0.0113492	-0.0407317	-0.0261268	-0.0365781	-0.0777776	-0.0253144	-0.0311944	-0.0156566	0.0461239
415.455	26.1644	-0.0907439	-0.0194324	0.00992247	-0.0826749	-0.0380151	-0.00267882	0.00371237	0.00770699	0.0491574	-0.0141841	0.0762735	0.049408	-0.0734268	0.0845382	0.00198012	-0.0473583	-0.00391582	-0.0485821	-0.0205062	0.0146149	-0.0433748	-0.0099794	-0.0288407	-0.0267266	-0.00481316	-0.0362132	-0.0671553	-0.00456691	-0.0343427	-0.0374265	-0.0113008	-0.0475626	-0.0270154	-0.00685589	-0.0455293	-0.0321944	-0.0161904	-0.0423209	-0.0298224	-0.0122171	-0.0398866	-0.0253589	-0.0365912	-0.075465	-0.0247256	-0.0318266	-0.0160695	0.0456199
418.738	26.2185	-0.0945502	-0.0162704	0.0100694	-0.0834167	-0.0355197	-0.00466174	0.00207142	0.0094513	0.0472648	-0.0144995	0.0772657	0.0474141	-0.0716598	0.0851479	0.00198066	-0.0460893	-0.00389521	-0.0494003	-0.0197596	0.0128284	-0.0432121	-0.00794922	-0.0302674	-0.0271042	-0.00357407	-0.0374854	-0.0667201	-0.00392415	-0.0360613	-0.0370094	-0.0122544	-0.0486199	-0.0253794	-0.0067996	-0.0462763	-0.0306197	-0.0165091	-0.0419871	-0.0291206	-0.0130936	-0.0390072	-0.0245531	-0.0364813	-0.0726775	-0.0241662	-0.0324894	-0.0166559	0.0450569
422.029	26.2725	-0.0979869	-0.0129905	0.0101932	-0.0839001	-0.0329286	-0.00663277	0.000578677	0.011091	0.0452364	-0.0147076	0.07814	0.0454754	-0.0698697	0.0857501	0.00198155	-0.044744	-0.00398437	-0.0500985	-0.0191037	0.0109174	-0.0430582	-0.0059718	-0.0316927	-0.0274886	-0.00240838	-0.0386602	-0.0660737	-0.0033417	-0.0376084	-0.0366042	-0.0133022	-0.0495394	-0.0237837	-0.00681753	-0.0469586	-0.0291899	-0.0168962	-0.0415741	-0.0283508	-0.0139828	-0.0381055	-0.023726	-0.0362668	-0.0694583	-0.0236578	-0.0331696	-0.0174023	0.0444342
425.268	26.3266	-0.101041	-0.00960722	0.0102632	-0.0841379	-0.0302674	-0.00858598	-0.000735116	0.0126159	0.0430968	-0.0147947	0.078876	0.0436091	-0.0680586	0.0863455	0.00198289	-0.0433036	-0.00420503	-0.0506744	-0.0185451	0.0088795	-0.0429024	-0.00408001	-0.0331003	-0.027867	-0.00132889	-0.0397376	-0.0651947	-0.00282246	-0.0389597	-0.0362101	-0.0144341	-0.0503162	-0.0222453	-0.00692783	-0.0475634	-0.027918	-0.017353	-0.0410696	-0.0275221	-0.014887	-0.0371948	-0.0228936	-0.0359734	-0.0658547	-0.0232204	-0.0338513	-0.0182929	0.0437502
428.51	26.3807	-0.103708	-0.00613574	0.0102429	-0.0841463	-0.0275605	-0.0105182	-0.00184044	0.0140178	0.0408722	-0.0147455	0.0794562	0.0418304	-0.066225	0.0869298	0.00198483	-0.0417536	-0.00457927	-0.0511285	-0.0180812	0.0067149	-0.0427305	-0.00230628	-0.0344744	-0.0282228	-0.000345241	-0.0407223	-0.0640669	-0.0023691	-0.0400965	-0.0358246	-0.0156417	-0.0509472	-0.020781	-0.00714669	-0.0480765	-0.0268067	-0.0178819	-0.0404615	-0.0266445	-0.0158047	-0.0362884	-0.0220725	-0.0356308	-0.0619186	-0.0228715	-0.0345162	-0.0193102	0.0430029
431.705	26.4348	-0.105989	-0.00259111	0.0100941	-0.083943	-0.0248316	-0.0124296	-0.00271066	0.0152906	0.0385898	-0.0145441	0.0798669	0.040153	-0.0643645	0.0874947	0.00198748	-0.0400847	-0.00512652	-0.0514635	-0.0177013	0.00442548	-0.042526	-0.00067965	-0.0358002	-0.0285364	0.000536029	-0.0416229	-0.0626786	-0.00198251	-0.0410058	-0.0354443	-0.0169189	-0.0514312	-0.0194064	-0.00748799	-0.0484856	-0.025849	-0.0184886	-0.0397397	-0.0257276	-0.0167293	-0.035399	-0.0212792	-0.035269	-0.0577019	-0.0226254	-0.035145	-0.0204354	0.0421898
434.961	26.4888	-0.107894	0.00101188	0.00978054	-0.0835465	-0.0221027	-0.0143228	-0.0033224	0.0164325	0.0362772	-0.0141745	0.0800997	0.0385891	-0.0624698	0.088028	0.00199101	-0.0382928	-0.0058618	-0.0516838	-0.017388	0.00201385	-0.042271	0.000777345	-0.0370641	-0.0287865	0.00131087	-0.0424492	-0.0610232	-0.00166021	-0.0416821	-0.0350652	-0.0182627	-0.0517696	-0.0181348	-0.00796374	-0.0487808	-0.0250304	-0.0191806	-0.0388962	-0.0247799	-0.0176497	-0.034539	-0.0205302	-0.0349151	-0.0532579	-0.0224927	-0.0357195	-0.021648	0.0413086
438.232	26.5429	-0.109438	0.00465853	0.00927101	-0.0829764	-0.0193953	-0.016202	-0.00365655	0.017447	0.0339612	-0.0136221	0.0801527	0.0371501	-0.0605324	0.0885148	0.00199556	-0.0363787	-0.00679384	-0.0517969	-0.0171215	-0.000516754	-0.041947	0.00205054	-0.0382558	-0.0289522	0.0019774	-0.0432086	-0.0590984	-0.00139603	-0.042129	-0.0346826	-0.0196728	-0.0519652	-0.0169757	-0.00858404	-0.0489567	-0.02433	-0.019965	-0.037927	-0.0238082	-0.0185534	-0.0337207	-0.0198415	-0.034591	-0.0486393	-0.0224805	-0.0362241	-0.0229249	0.040357
441.525	26.597	-0.110644	0.00833314	0.00854047	-0.0822535	-0.0167298	-0.0180696	-0.00369832	0.0183432	0.0316678	-0.0128745	0.0800323	0.035847	-0.0585434	0.088939	0.00200128	-0.0343472	-0.00792454	-0.0518122	-0.0168819	-0.00316198	-0.0415376	0.00313452	-0.0393694	-0.0290131	0.00253564	-0.0439042	-0.056907	-0.00118023	-0.0423599	-0.0342908	-0.0211496	-0.0520235	-0.0159345	-0.0093574	-0.049012	-0.0237231	-0.0208461	-0.0368318	-0.0228178	-0.0194287	-0.0329557	-0.019228	-0.0343128	-0.0439017	-0.0225916	-0.0366466	-0.0242391	0.0393332
444.728	26.651	-0.111538	0.0120181	0.00757075	-0.0814004	-0.0141269	-0.019926	-0.00343817	0.0191348	0.0294217	-0.0119232	0.0797526	0.0346885	-0.0564948	0.0892836	0.00200833	-0.0322075	-0.00924904	-0.0517422	-0.0166518	-0.00591445	-0.0410286	0.00403212	-0.0404046	-0.0289507	0.00298787	-0.0445348	-0.054459	-0.000999744	-0.042396	-0.033882	-0.0226936	-0.0519515	-0.0150122	-0.0102899	-0.0489502	-0.0231831	-0.0218244	-0.0356147	-0.0218129	-0.0202671	-0.0322539	-0.0187039	-0.0340905	-0.0391021	-0.0228243	-0.0369802	-0.0255598	0.0382358
447.96	26.7051	-0.112153	0.015693	0.00634997	-0.0804403	-0.0116073	-0.0217696	-0.00287353	0.0198386	0.0272467	-0.010764	0.0793338	0.0336801	-0.0543806	0.0895325	0.00201685	-0.029973	-0.0107566	-0.0516015	-0.0164172	-0.00876152	-0.04041	0.00475315	-0.0413656	-0.0287485	0.0033384	-0.0450964	-0.0517718	-0.000839473	-0.0422629	-0.0334466	-0.0243054	-0.0517591	-0.0142062	-0.0113842	-0.0487776	-0.022683	-0.0228949	-0.0342834	-0.0207974	-0.0210627	-0.0316227	-0.0182808	-0.033929	-0.0342995	-0.0231725	-0.0372229	-0.0268536	0.037064
451.172	26.7592	-0.112519	0.0193338	0.00487205	-0.0793946	-0.00919149	-0.0235987	-0.00201007	0.0204725	0.0251649	-0.00939718	0.0787997	0.0328246	-0.0521963	0.0896715	0.00202698	-0.0276627	-0.0124316	-0.0514065	-0.0161674	-0.0116836	-0.0396763	0.005313	-0.0422602	-0.0283933	0.00359378	-0.0455834	-0.0488718	-0.000684057	-0.0419875	-0.032975	-0.0259854	-0.0514595	-0.0135112	-0.0126383	-0.0485025	-0.0221962	-0.0240485	-0.0328491	-0.0197754	-0.0218111	-0.0310665	-0.0179666	-0.0338283	-0.0295531	-0.0236253	-0.0373779	-0.0280875	0.0358173
454.447	26.8133	-0.11267	0.0229147	0.00313756	-0.078282	-0.0068987	-0.0254135	-0.000861653	0.0210528	0.0231967	-0.00782658	0.0781754	0.0321212	-0.0499395	0.0896889	0.00203887	-0.0253004	-0.0142544	-0.0511735	-0.0158956	-0.0146542	-0.0388267	0.00573215	-0.0430971	-0.0278752	0.00376165	-0.0459897	-0.0457929	-0.000520119	-0.0415962	-0.032459	-0.0277332	-0.0510696	-0.01292	-0.0140451	-0.0481335	-0.021697	-0.0252719	-0.0313256	-0.018752	-0.0225079	-0.0305857	-0.017765	-0.0337834	-0.024921	-0.0241665	-0.0374516	-0.0292318	0.0344955
457.686	26.8673	-0.112637	0.0264096	0.0011548	-0.0771147	-0.00474691	-0.0272158	0.000551194	0.0215925	0.0213588	-0.00605927	0.0774837	0.0315649	-0.0476095	0.0895763	0.00205265	-0.0229131	-0.0162015	-0.0509164	-0.0156003	-0.0176409	-0.0378664	0.00603555	-0.043885	-0.0271871	0.00384963	-0.0463097	-0.0425748	-0.000337613	-0.0411123	-0.0318929	-0.0295475	-0.0506099	-0.0124246	-0.0155932	-0.0476793	-0.0211635	-0.026547	-0.029729	-0.017732	-0.0231495	-0.0301765	-0.0176754	-0.0337853	-0.020458	-0.0247764	-0.0374507	-0.0302624	0.0330985
460.963	26.9214	-0.112451	0.0297927	-0.00106086	-0.0758974	-0.00275158	-0.0290079	0.00220441	0.0221021	0.0196638	-0.00410484	0.0767428	0.0311467	-0.0452082	0.0893294	0.00206846	-0.0205293	-0.0182468	-0.050645	-0.0152865	-0.0206084	-0.0368054	0.00625163	-0.0446306	-0.026326	0.00386417	-0.0465393	-0.0392598	-0.000130578	-0.0405548	-0.0312741	-0.0314257	-0.0501034	-0.0120171	-0.0172669	-0.0471487	-0.0205777	-0.0278507	-0.0280763	-0.0167206	-0.0237331	-0.0298317	-0.0176944	-0.0338211	-0.0162132	-0.0254316	-0.0373804	-0.0311625	0.0316266
464.193	26.9755	-0.112138	0.03304	-0.00348597	-0.0746262	-0.000924512	-0.0307917	0.00407262	0.0225896	0.0181194	-0.00197486	0.0759644	0.0308541	-0.0427395	0.0889471	0.00208645	-0.018177	-0.0203614	-0.0503638	-0.0149651	-0.0235198	-0.0356575	0.00641009	-0.0453374	-0.025294	0.00380917	-0.0466764	-0.0358905	0.000102811	-0.039937	-0.0306024	-0.0333619	-0.0495737	-0.0116897	-0.0190473	-0.0465497	-0.0199284	-0.0291565	-0.0263852	-0.0157228	-0.0242586	-0.0295416	-0.0178168	-0.0338747	-0.0122283	-0.0261064	-0.0372424	-0.031923	0.0300803
467.452	27.0296	-0.11172	0.0361299	-0.00609109	-0.0732896	0.000727365	-0.0325667	0.00613091	0.0230619	0.016729	0.000316757	0.0751539	0.0306725	-0.0402102	0.0884316	0.00210676	-0.0158819	-0.0225146	-0.0500713	-0.0146519	-0.0263394	-0.0344385	0.00653969	-0.046006	-0.024099	0.0036857	-0.0467198	-0.0325071	0.000359685	-0.039267	-0.0298803	-0.0353471	-0.0490415	-0.011435	-0.0209125	-0.0458903	-0.0192129	-0.0304361	-0.0246742	-0.0147447	-0.024729	-0.029294	-0.0180368	-0.0339265	-0.00853837	-0.026775	-0.0370354	-0.0325415	0.0284609
470.653	27.0836	-0.111217	0.0390442	-0.00884148	-0.0718687	0.00220169	-0.0343291	0.00835643	0.0235261	0.0154928	0.00275347	0.0743104	0.0305858	-0.0376307	0.0877857	0.00212953	-0.0136666	-0.0246746	-0.0497602	-0.0143653	-0.0290348	-0.0331639	0.00666679	-0.0466343	-0.0227553	0.00349133	-0.0466694	-0.0291458	0.000631793	-0.0385487	-0.029112	-0.0373682	-0.0485223	-0.0112463	-0.0228377	-0.0451787	-0.0184373	-0.0316611	-0.022961	-0.0137935	-0.0251498	-0.0290757	-0.018349	-0.0339549	-0.00516928	-0.027414	-0.0367564	-0.0330224	0.0267697
473.885	27.1377	-0.110641	0.0417692	-0.0116994	-0.0703399	0.00350041	-0.0360717	0.01073	0.0239896	0.0144084	0.00531634	0.073427	0.0305774	-0.0350152	0.0870119	0.0021549	-0.0115499	-0.0268105	-0.0494181	-0.0141247	-0.0315776	-0.0318465	0.0068132	-0.047219	-0.0212823	0.00322051	-0.046526	-0.025838	0.000905766	-0.0377828	-0.028303	-0.0394076	-0.0480247	-0.0111169	-0.0247963	-0.0444232	-0.0176155	-0.0328036	-0.0212627	-0.0128787	-0.0255299	-0.0288728	-0.0187483	-0.0339373	-0.00213835	-0.0280044	-0.0364019	-0.0333751	0.0250084
477.095	27.1918	-0.110001	0.0442941	-0.0146277	-0.068677	0.00462927	-0.0377843	0.0132362	0.0244599	0.0134713	0.00798474	0.0724917	0.0306315	-0.0323808	0.0861124	0.002183	-0.00954688	-0.0288937	-0.0490288	-0.0139487	-0.0339439	-0.0304961	0.00699494	-0.0477558	-0.0197037	0.00286475	-0.046292	-0.0226104	0.00116403	-0.0369677	-0.0274588	-0.0414438	-0.0475506	-0.0110397	-0.0267601	-0.04363	-0.0167674	-0.0338368	-0.0195949	-0.0120117	-0.0258819	-0.0286729	-0.0192292	-0.033852	0.000547095	-0.0285322	-0.0359688	-0.0336132	0.0231796
480.348	27.2459	-0.109298	0.0466106	-0.0175924	-0.0668538	0.00559705	-0.0394535	0.015864	0.0249451	0.0126752	0.0107371	0.0714891	0.0307339	-0.0297475	0.0850889	0.00221396	-0.00766907	-0.030899	-0.0485717	-0.0138513	-0.0361131	-0.0291197	0.00722198	-0.0482401	-0.0180455	0.00241412	-0.0459727	-0.0194859	0.00138555	-0.0361006	-0.0265853	-0.0434522	-0.0470953	-0.0110062	-0.0287008	-0.0428023	-0.0159172	-0.0347351	-0.0179713	-0.0112057	-0.02622	-0.0284644	-0.0197853	-0.0336799	0.00288876	-0.0289886	-0.0354535	-0.0337542	0.0212872
483.609	27.2999	-0.108527	0.0487128	-0.0205649	-0.0648462	0.00641455	-0.041065	0.0186046	0.0254531	0.0120106	0.0135523	0.0704007	0.0308721	-0.0271365	0.0839432	0.00224789	-0.00592548	-0.0328051	-0.0480247	-0.0138408	-0.0380684	-0.0277217	0.00749813	-0.0486668	-0.0163342	0.00185778	-0.0455767	-0.0164844	0.00154677	-0.0351783	-0.0256873	-0.045406	-0.0466484	-0.0110067	-0.0305909	-0.0419401	-0.0150905	-0.0354755	-0.0164026	-0.0104748	-0.0265588	-0.0282369	-0.0204092	-0.0334065	0.00489748	-0.0293683	-0.0348514	-0.0338178	0.0193367
486.882	27.354	-0.107679	0.0505971	-0.023522	-0.0626338	0.00709389	-0.0426046	0.0214509	0.0259889	0.011466	0.0164108	0.0692075	0.0310355	-0.0245706	0.0826758	0.00228491	-0.00432341	-0.0345962	-0.047365	-0.0139185	-0.0397969	-0.026304	0.00782091	-0.0490302	-0.0145959	0.00118614	-0.0451162	-0.0136236	0.00162258	-0.0341991	-0.0247698	-0.0472772	-0.0461951	-0.0110301	-0.0324039	-0.041039	-0.0143131	-0.0360402	-0.0148979	-0.00983318	-0.0269117	-0.0279801	-0.0210918	-0.0330225	0.00659487	-0.0296686	-0.0341577	-0.033826	0.0173352
490.046	27.4081	-0.10674	0.0522641	-0.0264452	-0.060199	0.00764765	-0.0440603	0.024396	0.0265535	0.0110272	0.0192955	0.0678911	0.0312161	-0.0220729	0.0812859	0.00232514	-0.00286957	-0.0362619	-0.0465713	-0.0140775	-0.0412905	-0.0248671	0.00818238	-0.0493243	-0.0128558	0.000392294	-0.0446063	-0.010918	0.0015876	-0.0331643	-0.023839	-0.0490376	-0.0457183	-0.0110642	-0.0341146	-0.0400918	-0.0136084	-0.0364174	-0.0134645	-0.00929488	-0.0272891	-0.027685	-0.0218215	-0.0325235	0.00801247	-0.0298892	-0.0333681	-0.0338016	0.0152925
493.249	27.4621	-0.105694	0.0537191	-0.0293199	-0.0575271	0.00808932	-0.0454227	0.0274331	0.0271433	0.0106774	0.0221921	0.0664363	0.0314089	-0.0196661	0.0797719	0.00236866	-0.00156967	-0.0377971	-0.0456247	-0.0143035	-0.0425465	-0.02341	0.00857002	-0.0495444	-0.0111363	-0.000526486	-0.0440621	-0.00837709	0.00141807	-0.0320785	-0.0229027	-0.0506608	-0.0451994	-0.0110963	-0.0357001	-0.0390907	-0.012997	-0.0366037	-0.0121082	-0.00887276	-0.0276984	-0.0273456	-0.0225839	-0.0319099	0.00918871	-0.0300321	-0.0324807	-0.0337681	0.0132202
496.505	27.5162	-0.104523	0.0549737	-0.0321337	-0.0546093	0.00843258	-0.0466852	0.0305558	0.0277508	0.0103979	0.0250886	0.0648327	0.0316134	-0.0173709	0.0781328	0.00241557	-0.000428053	-0.0392022	-0.0445114	-0.0145771	-0.0435681	-0.0219312	0.00896692	-0.0496876	-0.00945788	-0.0015694	-0.0434975	-0.00600504	0.00109381	-0.0309494	-0.0219711	-0.0521228	-0.0446204	-0.0111143	-0.0371395	-0.0380292	-0.0124959	-0.0366031	-0.0108343	-0.00857778	-0.0281435	-0.0269597	-0.0233637	-0.0311853	0.010165	-0.0301015	-0.0314972	-0.0337478	0.0111315
499.798	27.5703	-0.10321	0.0560457	-0.0348752	-0.0514436	0.0086909	-0.0478429	0.033757	0.028366	0.0101685	0.0279754	0.0630763	0.0318342	-0.0152052	0.0763706	0.00246594	0.000553245	-0.0404832	-0.0432233	-0.0148756	-0.0443643	-0.0204291	0.00935215	-0.0497545	-0.00783809	-0.00273231	-0.0429237	-0.00380116	0.000599384	-0.0297882	-0.0210555	-0.0534038	-0.0439642	-0.0111067	-0.038415	-0.0369027	-0.01212	-0.0364254	-0.00964791	-0.00841821	-0.0286251	-0.0265281	-0.0241464	-0.0303558	0.010983	-0.0301041	-0.0304229	-0.0337604	0.00904092
503.074	27.6244	-0.101735	0.0569568	-0.0375348	-0.0480357	0.00887643	-0.0488915	0.037029	0.0289769	0.00996841	0.0308441	0.0611708	0.0320803	-0.0131828	0.0744909	0.00251983	0.00137521	-0.0416497	-0.0417592	-0.0151749	-0.0449499	-0.0189041	0.00970116	-0.0497481	-0.0062908	-0.00401	-0.0423508	-0.0017614	-7.32426e-05	-0.0286077	-0.0201665	-0.0544906	-0.043215	-0.0110648	-0.039512	-0.0357084	-0.011881	-0.0360848	-0.00855415	-0.00839937	-0.0291391	-0.0260548	-0.0249202	-0.0294304	0.0116811	-0.0300489	-0.0292664	-0.0338208	0.00696373
506.365	27.6784	-0.100079	0.057731	-0.0401038	-0.0443992	0.0089982	-0.0498288	0.0403626	0.02957	0.00977691	0.0336874	0.0591272	0.0323645	-0.0113135	0.0725042	0.00257727	0.00204127	-0.0427141	-0.0401246	-0.015451	-0.0453455	-0.0173594	0.00998742	-0.0496738	-0.00482563	-0.00539568	-0.0417864	0.00011946	-0.000923444	-0.027423	-0.0193134	-0.0553778	-0.0423582	-0.010982	-0.0404204	-0.0344453	-0.011787	-0.0355992	-0.00755805	-0.00852375	-0.0296759	-0.0255464	-0.0256757	-0.0284196	0.0122939	-0.0299484	-0.0280394	-0.0339385	0.0049157
509.603	27.7325	-0.0982183	0.0583926	-0.0425744	-0.0405534	0.0090606	-0.0506553	0.0437452	0.0301294	0.00957433	0.0364987	0.0569639	0.0327029	-0.00960179	0.0704252	0.00263825	0.00255614	-0.0436897	-0.038332	-0.0156816	-0.045575	-0.0158013	0.0101848	-0.0495371	-0.00344803	-0.00688183	-0.0412351	0.00184715	-0.00194228	-0.0262515	-0.0185032	-0.0560672	-0.0413804	-0.0108541	-0.0411356	-0.0331141	-0.0118422	-0.0349889	-0.00666422	-0.00878951	-0.0302195	-0.0250111	-0.0264053	-0.0273346	0.0128516	-0.0298174	-0.0267572	-0.0341187	0.00291278
512.878	27.7866	-0.096132	0.0589653	-0.0449387	-0.0365227	0.00906148	-0.0513764	0.0471607	0.0306358	0.00934214	0.0392724	0.0547056	0.0331137	-0.0080485	0.0682731	0.00270274	0.00292508	-0.0445892	-0.0363999	-0.0158483	-0.0456638	-0.0142398	0.0102699	-0.0493442	-0.00215854	-0.0084604	-0.0406971	0.00342724	-0.00311415	-0.0251125	-0.0177425	-0.0565664	-0.0402696	-0.010678	-0.0416601	-0.031717	-0.0120478	-0.0342761	-0.00587645	-0.00919043	-0.030749	-0.0244584	-0.0271023	-0.0261843	0.0133838	-0.0296714	-0.0254385	-0.0343639	0.000970649
516.087	27.8407	-0.0937985	0.0594718	-0.047187	-0.0323334	0.00899245	-0.0520021	0.0505896	0.031066	0.00906351	0.0420036	0.0523812	0.0336151	-0.00665132	0.0660721	0.00277068	0.00315406	-0.0454248	-0.0343532	-0.0159404	-0.0456364	-0.0126879	0.010224	-0.0491017	-0.000953916	-0.0101231	-0.0401679	0.00486408	-0.00441704	-0.0240261	-0.0170371	-0.0568879	-0.0390177	-0.0104516	-0.0420044	-0.0302583	-0.0124022	-0.033482	-0.00519682	-0.00971571	-0.0312412	-0.0238979	-0.02776	-0.0249767	0.0139177	-0.0295252	-0.0241051	-0.0346754	-0.000895798
519.324	27.8947	-0.0911986	0.0599323	-0.0493073	-0.0280122	0.00883967	-0.0525456	0.0540106	0.0313925	0.00872398	0.0446882	0.0500222	0.0342239	-0.00540685	0.0638517	0.00284196	0.00325027	-0.0462069	-0.0322214	-0.0159565	-0.0455169	-0.0111609	0.0100353	-0.0488166	0.000171926	-0.0118607	-0.0396373	0.00616183	-0.00582363	-0.0230114	-0.0163926	-0.0570486	-0.0376216	-0.0101751	-0.0421861	-0.0287445	-0.012902	-0.0326256	-0.00462494	-0.0103515	-0.0316722	-0.0233394	-0.0283722	-0.0237185	0.0144767	-0.0293911	-0.0227812	-0.0350541	-0.00267319
522.554	27.9488	-0.0883163	0.0603634	-0.0512855	-0.0235845	0.0085863	-0.0530219	0.0574025	0.0315855	0.00831172	0.0473219	0.0476599	0.0349553	-0.00431058	0.0616448	0.00291645	0.0032229	-0.0469443	-0.0300372	-0.0159049	-0.0453272	-0.00967522	0.00969777	-0.0484967	0.00122622	-0.0136624	-0.0390906	0.00732493	-0.00730255	-0.0220841	-0.0158139	-0.0570674	-0.036084	-0.0098515	-0.042229	-0.0271841	-0.0135418	-0.0317241	-0.00415799	-0.0110824	-0.0320209	-0.0227919	-0.0289332	-0.0224155	0.0150762	-0.0292782	-0.0214921	-0.0355003	-0.00434934
525.818	28.0029	-0.0851399	0.0607776	-0.0531062	-0.0190737	0.00821341	-0.0534454	0.0607449	0.031615	0.00781831	0.0499013	0.045324	0.0358213	-0.00335819	0.0594864	0.00299399	0.00308354	-0.0476429	-0.027834	-0.0158023	-0.0450868	-0.00824832	0.00921022	-0.0481502	0.00221736	-0.0155152	-0.0385087	0.00835949	-0.00882098	-0.0212544	-0.0153052	-0.0569648	-0.0344143	-0.00948807	-0.0421605	-0.025589	-0.0143148	-0.0307936	-0.00379139	-0.0118932	-0.0322699	-0.0222638	-0.0294377	-0.0210721	0.0157215	-0.0291922	-0.0202636	-0.036013	-0.00591329
529.098	28.057	-0.0816626	0.0611819	-0.054754	-0.0145011	0.00770197	-0.0538285	0.0640192	0.0314533	0.00723946	0.052422	0.0430413	0.0368314	-0.00254573	0.0574111	0.00307437	0.00284584	-0.0483073	-0.0256433	-0.0156714	-0.0448112	-0.00689728	0.00857475	-0.0477855	0.0031546	-0.0174034	-0.0378697	0.0092734	-0.010347	-0.0205252	-0.0148697	-0.0567618	-0.032627	-0.00909705	-0.0420097	-0.0239744	-0.0152122	-0.02985	-0.00351893	-0.012769	-0.0324063	-0.0217612	-0.0298807	-0.0196923	0.0164056	-0.0291363	-0.0191202	-0.0365894	-0.00735502
532.384	28.111	-0.0778836	0.0615765	-0.056215	-0.00988714	0.00703309	-0.0541816	0.0672098	0.0310769	0.00657675	0.0548787	0.0408346	0.0379911	-0.0018702	0.0554513	0.00315737	0.00252514	-0.0489408	-0.0234926	-0.0155389	-0.0445124	-0.00563852	0.00779545	-0.0474119	0.00404814	-0.0193093	-0.0371515	0.0100759	-0.0118512	-0.019892	-0.0145079	-0.0564795	-0.0307406	-0.00869597	-0.0418047	-0.0223583	-0.0162239	-0.028909	-0.00333354	-0.0136959	-0.0324234	-0.0212873	-0.0302583	-0.0182799	0.0171091	-0.0291103	-0.0180831	-0.0372249	-0.00866596
535.599	28.1651	-0.0738079	0.0619537	-0.0574782	-0.00525215	0.00618917	-0.0545133	0.070303	0.0304671	0.00583848	0.0572642	0.0387218	0.0393024	-0.00132918	0.0536359	0.00324277	0.00213768	-0.0495457	-0.0214031	-0.0154333	-0.0441977	-0.00448784	0.00687745	-0.0470388	0.00490809	-0.0212152	-0.0363344	0.010777	-0.0133071	-0.0193424	-0.0142165	-0.0561378	-0.0287759	-0.00830601	-0.0415709	-0.0207602	-0.0173382	-0.0279858	-0.00322849	-0.0146604	-0.0323206	-0.0208421	-0.0305687	-0.0168393	0.0178017	-0.0291114	-0.0171692	-0.0379124	-0.00983923
538.824	28.2192	-0.0694463	0.0622982	-0.0585368	-0.000617561	0.00515393	-0.0548303	0.0732879	0.0296116	0.00503907	0.0595708	0.0367157	0.0407637	-0.000921171	0.051989	0.0033303	0.00169991	-0.0501231	-0.019389	-0.0153817	-0.0438699	-0.00346032	0.00582699	-0.0466743	0.00574319	-0.0231038	-0.035403	0.0113858	-0.0146908	-0.0188574	-0.0139883	-0.0557559	-0.026754	-0.00794972	-0.04133	-0.0192004	-0.0185435	-0.0270951	-0.00319741	-0.0156488	-0.0321013	-0.0204235	-0.0308121	-0.0153759	0.0184439	-0.0291338	-0.0163894	-0.0386416	-0.0108695
541.974	28.2733	-0.0648162	0.062588	-0.0593903	0.00399315	0.00391323	-0.0551373	0.0761565	0.0285065	0.00419799	0.0617903	0.0348236	0.0423693	-0.000645854	0.0505288	0.00341972	0.00122745	-0.0506725	-0.0174579	-0.0154079	-0.0435277	-0.00256878	0.00465176	-0.0463234	0.00656029	-0.0249602	-0.0343479	0.0119103	-0.0159827	-0.0184132	-0.0138134	-0.0553502	-0.0246958	-0.00764877	-0.0410986	-0.017698	-0.0198285	-0.0262511	-0.00323352	-0.0166475	-0.0317723	-0.0200267	-0.0309911	-0.0138975	0.0189923	-0.0291698	-0.0157474	-0.0393992	-0.0117537
545.109	28.3273	-0.059942	0.062796	-0.0600436	0.00855444	0.00245532	-0.055437	0.0789038	0.0271566	0.00333792	0.0639148	0.0330484	0.0441102	-0.00050492	0.0492677	0.00351076	0.00073342	-0.0511923	-0.0156122	-0.0155319	-0.0431665	-0.00182224	0.00336181	-0.0459863	0.00736342	-0.0267721	-0.0331658	0.0123558	-0.0171688	-0.0179839	-0.0136814	-0.0549342	-0.0226206	-0.00742206	-0.0408881	-0.0162699	-0.0211829	-0.0254668	-0.00332993	-0.0176428	-0.031342	-0.0196448	-0.0311097	-0.0124134	0.0194049	-0.0292097	-0.0152408	-0.0401693	-0.0124909
548.461	28.3814	-0.0548555	0.0628921	-0.0605075	0.0130404	0.000771766	-0.0557297	0.0815266	0.0255731	0.00248478	0.0659377	0.0313904	0.0459755	-0.000502076	0.0482102	0.00360317	0.000227467	-0.0516808	-0.0138499	-0.015768	-0.0427794	-0.00122476	0.00197151	-0.0456589	0.00815422	-0.0285293	-0.0318578	0.012726	-0.0182419	-0.0175448	-0.0135843	-0.0545172	-0.0205479	-0.00728466	-0.0407049	-0.0149302	-0.0225969	-0.0247516	-0.00347985	-0.0186206	-0.0308208	-0.0192692	-0.031172	-0.0109345	0.0196422	-0.0292426	-0.0148626	-0.040935	-0.0130826
551.79	28.4355	-0.0495964	0.0628463	-0.0607962	0.0174266	-0.00114105	-0.056013	0.0840232	0.0237722	0.00166627	0.0678532	0.0298477	0.0479533	-0.000643286	0.0473535	0.0036967	-0.000284841	-0.0521365	-0.0121663	-0.0161252	-0.0423576	-0.000775141	0.000500484	-0.0453327	0.0089323	-0.0302219	-0.0304292	0.0130249	-0.0192015	-0.0170736	-0.0135171	-0.0541047	-0.0184971	-0.00724841	-0.0405503	-0.0136903	-0.024062	-0.0241119	-0.00367607	-0.0195672	-0.0302207	-0.0188915	-0.0311807	-0.00947186	0.0196669	-0.0292575	-0.0146043	-0.0416788	-0.0135319
555.083	28.4895	-0.0442116	0.0626316	-0.0609249	0.02169	-0.00327993	-0.0562822	0.086394	0.0217741	0.000910382	0.0696555	0.0284176	0.0500314	-0.000935822	0.0466888	0.0037911	-0.00080178	-0.0525591	-0.0105568	-0.0166073	-0.0418899	-0.000466735	-0.00102776	-0.0449974	0.00969566	-0.0318393	-0.0288868	0.0132573	-0.0200533	-0.0165515	-0.0134782	-0.053697	-0.0164885	-0.00732293	-0.0404217	-0.0125597	-0.0255698	-0.0235504	-0.00391048	-0.0204706	-0.0295554	-0.0185056	-0.0311355	-0.00803624	0.0194422	-0.0292436	-0.0144571	-0.042383	-0.0138436
558.345	28.5436	-0.0387551	0.062226	-0.0609092	0.0258084	-0.00563482	-0.0565294	0.088641	0.0196027	0.000244381	0.0713394	0.0270976	0.0521967	-0.00138783	0.0462035	0.00388615	-0.00132448	-0.0529489	-0.00901867	-0.0172127	-0.0413646	-0.000288179	-0.00258945	-0.0446417	0.0104402	-0.0333693	-0.0272398	0.0134288	-0.0208081	-0.0159626	-0.0134684	-0.0532898	-0.0145433	-0.00751689	-0.0403125	-0.0115461	-0.0271129	-0.0230656	-0.00417443	-0.0213214	-0.0288396	-0.0181082	-0.0310337	-0.00663787	0.0189308	-0.0291919	-0.0144117	-0.0430299	-0.0140227
561.578	28.5977	-0.0332861	0.0616132	-0.0607645	0.0297587	-0.00818893	-0.056744	0.090767	0.0172862	-0.000306724	0.0728989	0.0258846	0.0544341	-0.00200823	0.0458835	0.0039816	-0.00185634	-0.0533062	-0.00755057	-0.0179342	-0.0407704	-0.000225548	-0.00416388	-0.0442552	0.0111606	-0.0347994	-0.0255	0.0135447	-0.0214806	-0.0152933	-0.0134901	-0.0528737	-0.0126826	-0.00783944	-0.0402125	-0.0106542	-0.0286829	-0.0226519	-0.00445965	-0.0221144	-0.0280872	-0.0177001	-0.0308709	-0.00528731	0.0180964	-0.0290954	-0.0144569	-0.0436014	-0.0140747
564.781	28.6518	-0.027866	0.0607817	-0.0605051	0.0335179	-0.0109202	-0.0569131	0.0927755	0.0148571	-0.000720255	0.0743277	0.0247745	0.0567262	-0.0028053	0.0457142	0.00407724	-0.00240233	-0.0536296	-0.00615094	-0.0187579	-0.0400974	-0.000264631	-0.00573508	-0.043829	0.0118499	-0.0361182	-0.0236824	0.0136087	-0.0220869	-0.0145326	-0.0135452	-0.0524368	-0.0109264	-0.00830002	-0.0401081	-0.00988411	-0.0302692	-0.0223011	-0.00475954	-0.022848	-0.0273107	-0.0172864	-0.030642	-0.0039956	0.0169057	-0.0289502	-0.0145779	-0.0440803	-0.0140047
568.008	28.7058	-0.0225556	0.0597255	-0.0601442	0.0370633	-0.0138032	-0.0570232	0.0946691	0.0123516	-0.000977045	0.0756194	0.0237624	0.0590539	-0.00378581	0.0456793	0.00417286	-0.00296923	-0.0539153	-0.0048169	-0.0196638	-0.0393361	-0.000391984	-0.0072912	-0.0433553	0.0125011	-0.0373178	-0.0218051	0.0136219	-0.0226434	-0.0136741	-0.0136343	-0.0519663	-0.00929149	-0.00890834	-0.0399823	-0.00923161	-0.0318576	-0.0220024	-0.00506908	-0.0235226	-0.0265196	-0.0168745	-0.0303432	-0.00277269	0.01533	-0.0287541	-0.014757	-0.0444497	-0.013817
571.234	28.7599	-0.0174119	0.0584438	-0.0596918	0.0403726	-0.0168117	-0.0570624	0.0964486	0.00980706	-0.00106376	0.0767679	0.022842	0.0613975	-0.00495466	0.0457612	0.00426826	-0.0035656	-0.054156	-0.00354442	-0.0206272	-0.0384777	-0.000595119	-0.00882374	-0.042827	0.0131079	-0.0383953	-0.0198889	0.0135835	-0.0231654	-0.0127166	-0.0137568	-0.0514492	-0.00778987	-0.00967192	-0.0398175	-0.00868876	-0.0334301	-0.0217432	-0.0053843	-0.0241387	-0.0257196	-0.0164735	-0.0299722	-0.00162602	0.0133507	-0.0285067	-0.0149732	-0.0446954	-0.0135153
574.479	28.814	-0.0124864	0.0569435	-0.0591515	0.043426	-0.0199187	-0.0570196	0.0981135	0.00726009	-0.000974299	0.0777684	0.0220058	0.0637375	-0.00631434	0.0459409	0.00436324	-0.00420122	-0.0543411	-0.00233014	-0.0216224	-0.0375143	-0.000861581	-0.0103258	-0.0422374	0.0136655	-0.0393537	-0.0179549	0.0134901	-0.023665	-0.0116658	-0.0139109	-0.0508735	-0.00642831	-0.010595	-0.0395976	-0.00824544	-0.0349674	-0.0215089	-0.00570172	-0.0246966	-0.0249122	-0.0160929	-0.0295306	-0.000559654	0.0109608	-0.0282091	-0.0152052	-0.0448056	-0.0131022
577.694	28.8681	-0.00782443	0.0552391	-0.0585207	0.0462072	-0.0230965	-0.0568851	0.0996623	0.00474413	-0.00070958	0.0786164	0.0212441	0.0660548	-0.00786645	0.0461995	0.00445762	-0.00488547	-0.0544572	-0.00117231	-0.0226255	-0.0364423	-0.0011793	-0.0117902	-0.0415814	0.0141702	-0.0402017	-0.0160214	0.0133382	-0.0241495	-0.0105353	-0.0140935	-0.0502284	-0.00520922	-0.011677	-0.0393115	-0.00789051	-0.0364513	-0.0212834	-0.00601794	-0.025198	-0.0240953	-0.0157439	-0.0290245	0.000425444	0.00816633	-0.0278642	-0.0154337	-0.044772	-0.0125806
580.937	28.9221	-0.00346514	0.0533521	-0.0577901	0.0487057	-0.0263149	-0.0566488	0.101094	0.00228802	-0.000276859	0.0793076	0.0205455	0.0683312	-0.00961231	0.0465183	0.00455121	-0.00562524	-0.0544877	-7.12056e-05	-0.0236174	-0.0352628	-0.00153725	-0.0132087	-0.0408573	0.0146191	-0.0409519	-0.0141023	0.0131253	-0.024621	-0.00934621	-0.0143018	-0.0495034	-0.00413149	-0.0129117	-0.0389543	-0.00761217	-0.0378674	-0.0210488	-0.00633046	-0.0256461	-0.0232646	-0.0154396	-0.0284647	0.00133153	0.00498317	-0.0274777	-0.015643	-0.0445892	-0.0119532
584.151	28.9762	0.000558834	0.0513104	-0.0569448	0.050917	-0.0295428	-0.0563006	0.102407	-8.39112e-05	0.000312059	0.0798373	0.0198978	0.0705498	-0.0115535	0.0468799	0.00464383	-0.00642309	-0.0544135	0.000971711	-0.0245853	-0.0339806	-0.00192557	-0.0145731	-0.0400688	0.0150091	-0.0416198	-0.0122059	0.0128511	-0.0250759	-0.00812404	-0.0145339	-0.0486878	-0.00319201	-0.0142875	-0.038527	-0.00739859	-0.0392049	-0.0207882	-0.00663834	-0.0260468	-0.0224161	-0.0151956	-0.0278654	0.002164	0.00143485	-0.027057	-0.0158214	-0.0442539	-0.0112224
587.47	29.0303	0.00422164	0.0491465	-0.055966	0.052842	-0.032749	-0.05583	0.103606	-0.00235138	0.00104195	0.0802003	0.0192877	0.0726939	-0.0136919	0.0472684	0.00473531	-0.00727673	-0.054214	0.00195486	-0.0255218	-0.0326034	-0.00233548	-0.0158765	-0.0392243	0.0153368	-0.0422223	-0.0103351	0.0125175	-0.0255068	-0.00689559	-0.0147885	-0.0477695	-0.00238588	-0.0157881	-0.0380355	-0.00723785	-0.0404572	-0.0204862	-0.00694253	-0.0264081	-0.021548	-0.0150283	-0.0272419	0.00293046	-0.0024509	-0.026611	-0.0159602	-0.0437655	-0.0103901
590.778	29.0844	0.00750388	0.0468938	-0.0548341	0.0544846	-0.0359028	-0.055227	0.104692	-0.00449757	0.00189571	0.0803912	0.0187013	0.0747478	-0.0160299	0.0476703	0.00482548	-0.00817966	-0.053869	0.00287855	-0.0264253	-0.0311399	-0.00276037	-0.0171165	-0.0383379	0.0155982	-0.0427766	-0.00849028	0.0121266	-0.0259043	-0.00568607	-0.0150643	-0.046735	-0.00170622	-0.0173937	-0.0374888	-0.00711731	-0.0416207	-0.0201303	-0.00724517	-0.0267416	-0.0206621	-0.0149534	-0.0266102	0.00363974	-0.00664118	-0.026149	-0.0160529	-0.043126	-0.00945757
594.032	29.1384	0.0103914	0.0445839	-0.0535316	0.0558503	-0.0389761	-0.0544842	0.105671	-0.0065082	0.00285628	0.0804041	0.018123	0.0766967	-0.0185694	0.0480743	0.00491417	-0.00912163	-0.053359	0.00374652	-0.0272973	-0.0295993	-0.003196	-0.0182968	-0.0374277	0.0157876	-0.0433	-0.00667118	0.0116802	-0.0262585	-0.00451777	-0.0153595	-0.0455688	-0.00114409	-0.0190814	-0.0368966	-0.00702341	-0.0426946	-0.0197117	-0.0075502	-0.0270607	-0.0197645	-0.0149844	-0.0259859	0.00430031	-0.0110988	-0.0256796	-0.0160934	-0.0423406	-0.00842488
597.242	29.1925	0.0128745	0.0422444	-0.0520457	0.0569444	-0.0419441	-0.0535982	0.10655	-0.00837113	0.00390731	0.0802342	0.0175356	0.0785262	-0.0213114	0.0484716	0.0050012	-0.0100905	-0.0526667	0.00456629	-0.0281408	-0.0279898	-0.00364012	-0.0194287	-0.0365144	0.0158971	-0.0438096	-0.00487937	0.0111778	-0.0265595	-0.00340912	-0.0156711	-0.0442562	-0.000687768	-0.0208252	-0.0362673	-0.00694289	-0.0436809	-0.0192271	-0.00786359	-0.0273805	-0.0188643	-0.0151313	-0.0253837	0.00491906	-0.0157822	-0.0252092	-0.0160763	-0.0414169	-0.0072914
600.494	29.2466	0.0149476	0.0398987	-0.0503693	0.0577707	-0.0447872	-0.0525701	0.107333	-0.0100775	0.00503277	0.0798768	0.0169198	0.0802217	-0.0242555	0.0488542	0.00508641	-0.011073	-0.0517778	0.00534842	-0.0289593	-0.0263197	-0.00409149	-0.0205297	-0.0356187	0.0159163	-0.0443224	-0.00312051	0.0106176	-0.0267991	-0.00237434	-0.0159955	-0.0427837	-0.000322799	-0.0225971	-0.0356065	-0.00686272	-0.0445839	-0.0186788	-0.00819273	-0.0277157	-0.0179725	-0.0154003	-0.0248171	0.00550023	-0.0206443	-0.0247421	-0.0159957	-0.0403649	-0.00605601
603.698	29.3006	0.0166101	0.0375648	-0.0485014	0.0583316	-0.0474904	-0.0514043	0.108024	-0.0116216	0.00621652	0.079327	0.016257	0.0817705	-0.0273998	0.0492156	0.00516965	-0.0120565	-0.050682	0.0061057	-0.0297564	-0.0245971	-0.00454905	-0.0216211	-0.0347589	0.0158329	-0.0448553	-0.00140447	0.00999536	-0.0269712	-0.00142354	-0.0163288	-0.0411408	-3.22685e-05	-0.0243677	-0.0349164	-0.00677034	-0.0454091	-0.0180739	-0.00854574	-0.0280805	-0.0171007	-0.0157926	-0.0242974	0.0060458	-0.0256342	-0.0242803	-0.0158455	-0.0391968	-0.00471755
606.979	29.3547	0.0178667	0.0352562	-0.0464479	0.0586294	-0.0500432	-0.0501074	0.108623	-0.013001	0.0074423	0.0785791	0.015531	0.0831619	-0.0307397	0.0495503	0.00525075	-0.0130284	-0.0493745	0.00685214	-0.0305366	-0.0228315	-0.00501135	-0.0227256	-0.0339494	0.015634	-0.0454251	0.000254376	0.00930495	-0.0270732	-0.000562977	-0.0166674	-0.0393214	0.000202129	-0.0261078	-0.0341965	-0.00665411	-0.0461638	-0.0174213	-0.00893137	-0.0284872	-0.0162602	-0.0163035	-0.0238343	0.00655569	-0.0306964	-0.0238248	-0.015621	-0.0379272	-0.003275
610.227	29.4088	0.0187293	0.0329829	-0.0442202	0.0586685	-0.0524389	-0.0486878	0.109125	-0.014217	0.00869451	0.0776272	0.0147305	0.0843887	-0.0342668	0.0498542	0.00532957	-0.0139775	-0.0478562	0.0076014	-0.0313042	-0.0210331	-0.00547676	-0.0238638	-0.0331995	0.0153081	-0.0460457	0.00183888	0.00853913	-0.0271052	0.000203762	-0.0170078	-0.0373245	0.000399216	-0.0277898	-0.0334444	-0.00650384	-0.0468571	-0.0167311	-0.00935877	-0.0289456	-0.0154624	-0.0169228	-0.0234355	0.00702819	-0.0357693	-0.023376	-0.0153208	-0.0365739	-0.00172733
613.484	29.4629	0.0192163	0.0307535	-0.041833	0.0584567	-0.0546719	-0.0471557	0.109521	-0.0152739	0.0099582	0.0764658	0.0138493	0.0854467	-0.0379691	0.0501266	0.00540595	-0.014893	-0.0461341	0.0083648	-0.0320635	-0.0192132	-0.00594421	-0.0250529	-0.0325143	0.0148457	-0.0467268	0.00333029	0.00769031	-0.0270694	0.0008755	-0.0173466	-0.035154	0.000576895	-0.0293879	-0.0326576	-0.00631218	-0.0474998	-0.0160142	-0.00983724	-0.0294633	-0.0147186	-0.0176359	-0.0231068	0.00745985	-0.0407889	-0.0229357	-0.0149486	-0.0351565	-7.36114e-05
616.703	29.5169	0.0193508	0.0285766	-0.0393029	0.0580045	-0.0567372	-0.0455226	0.109799	-0.016178	0.0112191	0.0750899	0.0128872	0.0863348	-0.0418308	0.0503711	0.00547975	-0.0157654	-0.0442196	0.0091488	-0.0328188	-0.0173859	-0.0064137	-0.0263058	-0.0318954	0.0142395	-0.0474718	0.00471034	0.00675182	-0.0269688	0.00145427	-0.0176804	-0.0328173	0.000751002	-0.030879	-0.0318354	-0.00607556	-0.0481048	-0.0152815	-0.0103759	-0.0300453	-0.01404	-0.0184264	-0.0228508	0.00784532	-0.0456923	-0.0225076	-0.0145135	-0.0336959	0.00168701
619.926	29.571	0.0191563	0.0264607	-0.0366481	0.0573231	-0.0586294	-0.0438014	0.109944	-0.016936	0.012464	0.0734944	0.0118493	0.0870532	-0.045834	0.0505956	0.00555082	-0.0165864	-0.0421279	0.00995468	-0.0335732	-0.0155671	-0.00688711	-0.0276316	-0.0313421	0.0134838	-0.0482769	0.00596215	0.00571851	-0.0268075	0.00194494	-0.0180061	-0.030325	0.000934625	-0.0322435	-0.0309789	-0.00579473	-0.0486862	-0.0145437	-0.0109836	-0.0306942	-0.0134386	-0.0192782	-0.0226671	0.00817677	-0.0504189	-0.0220977	-0.0140285	-0.0322148	0.00355537
623.115	29.6251	0.0186565	0.0244134	-0.033889	0.0564225	-0.0603437	-0.042005	0.109941	-0.0175544	0.0136814	0.0716754	0.0107452	0.0876011	-0.0499601	0.0508117	0.00561902	-0.0173501	-0.0398759	0.0107797	-0.0343282	-0.0137745	-0.00736855	-0.0290367	-0.0308525	0.0125724	-0.0491337	0.00707059	0.00458697	-0.026591	0.00235506	-0.0183211	-0.0276904	0.0011376	-0.0334653	-0.0300896	-0.00547311	-0.0492569	-0.0138103	-0.0116691	-0.0314111	-0.0129267	-0.0201774	-0.0225519	0.00844405	-0.0549117	-0.0217131	-0.0135088	-0.0307389	0.00553237
626.405	29.6792	0.0178746	0.0224414	-0.031048	0.0553108	-0.0618768	-0.0401462	0.109772	-0.018039	0.014862	0.0696303	0.00958952	0.0879766	-0.0541905	0.0510326	0.00568424	-0.0180522	-0.0374809	0.011618	-0.0350816	-0.0120252	-0.00786376	-0.0305242	-0.0304233	0.0114994	-0.0500294	0.00802158	0.00335552	-0.0263266	0.00269421	-0.0186227	-0.0249305	0.00136633	-0.0345325	-0.0291672	-0.00511644	-0.0498265	-0.0130898	-0.01244	-0.032194	-0.0125158	-0.0211117	-0.0224983	0.008636	-0.0591197	-0.0213599	-0.0129713	-0.0292962	0.00761863
629.697	29.7332	0.016834	0.0205505	-0.0281479	0.0539941	-0.063228	-0.0382378	0.109419	-0.0183946	0.0159979	0.0673583	0.00840069	0.0881775	-0.0585061	0.0512711	0.00574634	-0.0186916	-0.0349601	0.0124611	-0.0358274	-0.0103337	-0.00837873	-0.0320929	-0.0300502	0.0102595	-0.0509479	0.00880212	0.00202465	-0.0260225	0.00297246	-0.0189078	-0.0220673	0.00162263	-0.0354377	-0.028209	-0.00473194	-0.0503989	-0.0123893	-0.0133017	-0.0330371	-0.0122156	-0.0220693	-0.0224967	0.00874168	-0.0629986	-0.0210424	-0.0124332	-0.0279168	0.00981475
632.967	29.7873	0.0155584	0.0187461	-0.0252107	0.0524764	-0.0643993	-0.0362924	0.108864	-0.0186253	0.0170803	0.064861	0.00720126	0.0882014	-0.0628869	0.0515383	0.00580522	-0.0192702	-0.0323308	0.0132974	-0.0365555	-0.00871143	-0.00891894	-0.0337365	-0.0297263	0.00885033	-0.0518685	0.00940176	0.000596333	-0.0256873	0.00319848	-0.0191731	-0.0191283	0.00190443	-0.0361797	-0.0272108	-0.00432919	-0.0509731	-0.011715	-0.0142562	-0.0339309	-0.0120323	-0.0230377	-0.0225366	0.0087513	-0.0665112	-0.0207631	-0.0119129	-0.0266306	0.0121209
636.177	29.8414	0.014069	0.0170336	-0.0222555	0.0507612	-0.0653942	-0.0343224	0.10809	-0.0187338	0.0181002	0.062143	0.00601626	0.0880464	-0.0673127	0.0518438	0.00586081	-0.0197934	-0.0296093	0.0141117	-0.0372529	-0.00716758	-0.00949023	-0.0354437	-0.0294437	0.00727344	-0.0527665	0.00981464	-0.000925062	-0.0253274	0.00337835	-0.0194143	-0.0161465	0.00220535	-0.036762	-0.0261686	-0.00392141	-0.0515438	-0.0110709	-0.0153024	-0.0348634	-0.0119669	-0.0240048	-0.0226082	0.00865614	-0.069626	-0.0205224	-0.0114298	-0.0254648	0.0145363
639.408	29.8955	0.0123839	0.0154184	-0.0192981	0.048853	-0.0662157	-0.0323391	0.107081	-0.0187222	0.0190484	0.0592111	0.00487262	0.0877117	-0.0717625	0.052195	0.00591301	-0.0202696	-0.0268106	0.0148855	-0.0379065	-0.00571083	-0.0100998	-0.0371975	-0.0291944	0.00553492	-0.0536138	0.0100409	-0.00253211	-0.0249462	0.00351479	-0.0196276	-0.0131587	0.00251573	-0.0371926	-0.0250807	-0.00352556	-0.0521037	-0.0104594	-0.0164367	-0.0358205	-0.0120153	-0.0249602	-0.0227024	0.00844895	-0.0723191	-0.0203201	-0.0110048	-0.0244421	0.0170592
642.609	29.9495	0.0105171	0.013907	-0.0163502	0.0467581	-0.0668674	-0.0303518	0.105828	-0.0185921	0.0199166	0.0560758	0.00379791	0.0871974	-0.0762159	0.0525982	0.00596176	-0.0207076	-0.0239476	0.0155986	-0.0385046	-0.0043486	-0.0107565	-0.038975	-0.0289721	0.00364394	-0.0543812	0.0100868	-0.00421353	-0.0245429	0.00360847	-0.0198104	-0.0102039	0.002823	-0.0374813	-0.0239475	-0.00316245	-0.0526445	-0.00988221	-0.0176543	-0.0367879	-0.0121691	-0.0258964	-0.0228112	0.00812488	-0.0745752	-0.0201553	-0.0106589	-0.0235803	0.0196862
645.871	30.0036	0.00847838	0.012506	-0.0134199	0.0444846	-0.067353	-0.0283667	0.104328	-0.0183444	0.0206991	0.0527505	0.0028187	0.0865038	-0.0806533	0.0530583	0.006007	-0.0211149	-0.0210315	0.0162298	-0.0390382	-0.00308651	-0.0114708	-0.0407476	-0.0287728	0.00161204	-0.055041	0.00996431	-0.00595458	-0.0241123	0.00365951	-0.0199621	-0.00732123	0.00311239	-0.037639	-0.0227726	-0.00285509	-0.0531583	-0.00934127	-0.0189504	-0.0377499	-0.0124161	-0.0268097	-0.0229277	0.00768129	-0.0763904	-0.0200261	-0.0104116	-0.0228918	0.0224129
649.144	30.0577	0.00627254	0.0112197	-0.0105131	0.0420415	-0.0676765	-0.0263862	0.102586	-0.0179784	0.0213934	0.0492518	0.00195979	0.0856315	-0.0850573	0.0535788	0.00604865	-0.0214977	-0.0180722	0.0167595	-0.0395014	-0.00192665	-0.0122533	-0.0424826	-0.0285951	-0.00054913	-0.0555696	0.0096896	-0.00773895	-0.0236465	0.00366812	-0.0200846	-0.00454759	0.003368	-0.0376765	-0.0215622	-0.00262686	-0.0536372	-0.00883876	-0.0203198	-0.0386912	-0.0127403	-0.0276995	-0.0230469	0.00711741	-0.077767	-0.0199293	-0.0102793	-0.0223837	0.0252333
652.41	30.1118	0.00389787	0.0100486	-0.00763541	0.0394373	-0.0678425	-0.0244093	0.100614	-0.0174921	0.0220012	0.0455995	0.00124313	0.0845826	-0.0894124	0.0541621	0.00608666	-0.0218602	-0.015079	0.0171711	-0.0398907	-0.000866935	-0.0131135	-0.0441452	-0.0284391	-0.00282818	-0.0559476	0.0092818	-0.00954985	-0.0231363	0.00363419	-0.0201831	-0.00191659	0.00357299	-0.0376033	-0.0203233	-0.00249923	-0.0540746	-0.00837638	-0.0217568	-0.0395979	-0.0131234	-0.0285675	-0.0231643	0.00643458	-0.0787156	-0.0198601	-0.0102733	-0.022059	0.0281401
655.62	30.1658	0.00134617	0.00898765	-0.00479323	0.0366799	-0.0678569	-0.0224325	0.0984349	-0.0168817	0.0225284	0.0418164	0.000687105	0.0833602	-0.0937057	0.0548081	0.00612096	-0.0222061	-0.0120616	0.0174516	-0.0402049	9.93351e-05	-0.0140574	-0.045701	-0.0283063	-0.00521423	-0.0561601	0.00876237	-0.0113709	-0.0225737	0.00355701	-0.0202659	0.00054266	0.00371013	-0.0374282	-0.0190629	-0.00249174	-0.0544653	-0.00795633	-0.0232545	-0.040458	-0.0135443	-0.0294174	-0.0232756	0.00563556	-0.0792508	-0.0198129	-0.0104007	-0.0219179	0.0311247
658.823	30.2199	-0.00139676	0.0080264	-0.00199385	0.0337765	-0.0677277	-0.0204496	0.0960763	-0.0161425	0.0229839	0.0379273	0.000305853	0.0819699	-0.097927	0.0555133	0.00615149	-0.0225385	-0.00903116	0.0175917	-0.040444	0.000983158	-0.0150865	-0.0471182	-0.0281984	-0.00769668	-0.056196	0.00815383	-0.0131861	-0.0219541	0.00343569	-0.0203433	0.00280661	0.00376193	-0.0371592	-0.0177864	-0.00262117	-0.0548061	-0.00758127	-0.0248035	-0.0412615	-0.0139807	-0.0302544	-0.0233761	0.00472527	-0.0793914	-0.0197798	-0.0106634	-0.0219576	0.0341772
661.973	30.274	-0.00434879	0.00714973	0.000753665	0.0307333	-0.0674648	-0.0184536	0.0935719	-0.01527	0.02338	0.0339593	0.000109859	0.0804209	-0.102068	0.0562715	0.00617819	-0.0228609	-0.00600166	0.0175868	-0.0406095	0.00179965	-0.0161976	-0.0483687	-0.0281175	-0.0102648	-0.0560487	0.00747838	-0.014981	-0.0212779	0.00327011	-0.020427	0.00485746	0.00371111	-0.036805	-0.0164976	-0.00290061	-0.0550952	-0.00725474	-0.0263906	-0.0420005	-0.0144096	-0.0310829	-0.0234593	0.00371099	-0.0791595	-0.0197518	-0.0110574	-0.0221736	0.0372862
665.254	30.328	-0.00752885	0.00633972	0.00343713	0.0275568	-0.06708	-0.0164367	0.0909592	-0.0142613	0.0237313	0.0299406	0.00010689	0.0787261	-0.106122	0.0570731	0.00620099	-0.0231763	-0.00299087	0.0174364	-0.0407032	0.00256638	-0.0173827	-0.0494291	-0.0280643	-0.0129073	-0.0557152	0.00675588	-0.0167429	-0.0205512	0.00306153	-0.0205282	0.00668392	0.00354226	-0.0363762	-0.0151987	-0.00333923	-0.0553326	-0.0069802	-0.0279989	-0.0426698	-0.0148091	-0.0319053	-0.0235168	0.00260202	-0.0785784	-0.0197192	-0.0115733	-0.0225594	0.0404387
668.611	30.3821	-0.0109544	0.00557753	0.00604084	0.0242548	-0.0665863	-0.0143926	0.0882781	-0.0131153	0.0240557	0.0259007	0.000301607	0.076901	-0.110083	0.0579075	0.00621985	-0.0234861	-2.09233e-05	0.0171452	-0.0407273	0.00330249	-0.0186296	-0.0502814	-0.0280378	-0.015611	-0.0551958	0.00600278	-0.0184611	-0.0197851	0.00281192	-0.0206556	0.00828169	0.00324328	-0.0358852	-0.0138908	-0.00394222	-0.0555199	-0.00676112	-0.0296081	-0.0432669	-0.0151601	-0.032722	-0.0235388	0.00140934	-0.0776689	-0.0196726	-0.0121966	-0.0231071	0.0436202
671.91	30.4362	-0.0146393	0.00484578	0.00854607	0.0208383	-0.0659959	-0.0123165	0.0855686	-0.0118336	0.0243737	0.021869	0.000694457	0.0749626	-0.113945	0.0587632	0.00623474	-0.0237891	0.00288152	0.0167223	-0.0406837	0.00402665	-0.0199235	-0.0509125	-0.0280343	-0.0183607	-0.054494	0.00523113	-0.0201279	-0.018995	0.00252363	-0.0208151	0.00965301	0.00280582	-0.0353464	-0.0125746	-0.00470987	-0.055659	-0.0066002	-0.0311954	-0.0437913	-0.0154471	-0.0335314	-0.0235155	0.000143227	-0.0764518	-0.0196042	-0.0129087	-0.0238072	0.0468146
675.115	30.4903	-0.0185924	0.00412984	0.0109326	0.017322	-0.0653181	-0.0102055	0.0828703	-0.0104193	0.0247067	0.0178749	0.00128076	0.0729296	-0.117701	0.0596291	0.00624563	-0.0240824	0.00568591	0.0161797	-0.0405737	0.00475505	-0.021248	-0.051314	-0.0280491	-0.0211377	-0.0536166	0.00444862	-0.0217363	-0.018199	0.00219993	-0.0210097	0.0108053	0.00222522	-0.0347757	-0.0112521	-0.0056376	-0.0557522	-0.00649964	-0.0327364	-0.0442428	-0.0156589	-0.0343317	-0.0234382	-0.0011883	-0.0749452	-0.0195103	-0.0136878	-0.0246485	0.0500051
678.366	30.5443	-0.0228169	0.00341888	0.0131793	0.0137231	-0.0645587	-0.00805942	0.0802202	-0.00887728	0.0250765	0.0139477	0.00205021	0.0708222	-0.121343	0.0604941	0.00625251	-0.0243622	0.00835911	0.0155308	-0.0403983	0.00549983	-0.0225857	-0.0514831	-0.0280762	-0.0239206	-0.0525738	0.00365827	-0.0232806	-0.0174162	0.00184457	-0.0212398	0.0117499	0.00150048	-0.0341887	-0.00992666	-0.00671588	-0.0558013	-0.00645997	-0.0342059	-0.0446211	-0.0157892	-0.0351219	-0.0233002	-0.00258025	-0.0731679	-0.0193906	-0.0145103	-0.0256185	0.0531746
681.584	30.5984	-0.0273117	0.00270663	0.015264	0.0100608	-0.0637196	-0.00588046	0.0776524	-0.00721391	0.0255051	0.010116	0.0029877	0.0686602	-0.124863	0.0613471	0.00625539	-0.0246251	0.0108673	0.0147899	-0.0401567	0.00626757	-0.0239186	-0.0514222	-0.0281096	-0.0266856	-0.0513796	0.00285841	-0.0247556	-0.016666	0.00146087	-0.0215046	0.0125008	0.000634742	-0.0336005	-0.00860414	-0.00793086	-0.0558061	-0.00648141	-0.035579	-0.0449256	-0.0158368	-0.0359019	-0.0230971	-0.00403047	-0.0711377	-0.0192484	-0.0153525	-0.0267035	0.056306
684.852	30.6525	-0.0320707	0.00199269	0.0171644	0.00635545	-0.0628003	-0.00367359	0.0751964	-0.0054373	0.0260142	0.00640812	0.00407453	0.0664624	-0.128252	0.0621758	0.00625431	-0.0248677	0.0131782	0.0139715	-0.0398458	0.00705889	-0.025228	-0.0511389	-0.0281432	-0.0294073	-0.0500515	0.00204259	-0.0261568	-0.0159668	0.00105062	-0.0218017	0.0130754	-0.000365611	-0.0330237	-0.00729234	-0.00926481	-0.0557648	-0.00656321	-0.0368321	-0.0451559	-0.015805	-0.0366734	-0.0228274	-0.00553706	-0.0688715	-0.0190889	-0.0161923	-0.027889	0.059382
688.1	30.7066	-0.0370834	0.00128285	0.0188592	0.00262702	-0.0617976	-0.00144739	0.0728761	-0.00355807	0.0266227	0.00284998	0.00528999	0.0642456	-0.131503	0.0629674	0.00624931	-0.0250878	0.0152619	0.013089	-0.03946	0.00786988	-0.0264945	-0.0506449	-0.0281708	-0.0320599	-0.0486094	0.00120108	-0.0274803	-0.015335	0.000612664	-0.0221267	0.0134928	-0.0014915	-0.0324685	-0.00600167	-0.0106966	-0.0556723	-0.00670429	-0.0379442	-0.0453108	-0.015701	-0.0374387	-0.0224921	-0.00709586	-0.0663854	-0.0189182	-0.0170105	-0.0291593	0.0623851
691.304	30.7606	-0.0423353	0.000588707	0.0203289	-0.00110477	-0.0607072	0.000786992	0.0707091	-0.00158863	0.0273443	-0.000535663	0.00661318	0.062024	-0.134607	0.063708	0.00624045	-0.0252849	0.017092	0.0121534	-0.038991	0.00869252	-0.0276988	-0.049955	-0.0281868	-0.0346174	-0.0470737	0.000322973	-0.0287232	-0.0147845	0.000142622	-0.0224741	0.0137731	-0.00273246	-0.0319426	-0.00474442	-0.0122029	-0.0555212	-0.00690388	-0.0388964	-0.0453888	-0.0155359	-0.0382017	-0.0220948	-0.00870077	-0.0636966	-0.0187417	-0.0177914	-0.0304959	0.0652977
694.53	30.8147	-0.0478095	-7.36407e-05	0.0215584	-0.00482124	-0.0595241	0.00301591	0.0687052	0.000457446	0.0281855	-0.0037297	0.00802476	0.0598092	-0.137557	0.0643836	0.00622784	-0.0254613	0.0186468	0.0111728	-0.0384285	0.00951549	-0.0288233	-0.0490862	-0.0281875	-0.0370537	-0.0454634	-0.000602918	-0.0298827	-0.0143259	-0.000367393	-0.0228371	0.0139364	-0.00407721	-0.0314501	-0.00353355	-0.0137593	-0.0553	-0.00716169	-0.0396738	-0.0453883	-0.0153241	-0.0389664	-0.0216421	-0.0103444	-0.0608224	-0.0185646	-0.0185234	-0.0318773	0.0681018
697.783	30.8688	-0.0534875	-0.000684559	0.0225377	-0.0085052	-0.0582439	0.0052246	0.0668663	0.00256642	0.0291454	-0.00671734	0.0095071	0.0576093	-0.140343	0.0649804	0.00621155	-0.0256221	0.0199105	0.0101522	-0.0377611	0.0103249	-0.0298533	-0.0480566	-0.0281721	-0.0393431	-0.0437957	-0.00158762	-0.030957	-0.0139657	-0.000927475	-0.0232078	0.0140019	-0.00551394	-0.0309919	-0.00238192	-0.0153421	-0.0549938	-0.00747743	-0.0402668	-0.0453079	-0.0150833	-0.0397368	-0.0211429	-0.0120183	-0.0577855	-0.018391	-0.0192	-0.0332779	0.0707795
700.985	30.9229	-0.0593476	-0.00122246	0.0232624	-0.0121418	-0.0568631	0.00739812	0.0651874	0.00472544	0.0302158	-0.00948842	0.0110445	0.0554288	-0.142957	0.0654856	0.00619172	-0.0257746	0.020874	0.00909419	-0.0369776	0.0111061	-0.0307792	-0.0468846	-0.0281438	-0.0414604	-0.0420855	-0.00264221	-0.0319446	-0.0137045	-0.00154872	-0.0235775	0.0139876	-0.00703179	-0.0305662	-0.0013018	-0.0169286	-0.0545847	-0.00785062	-0.040672	-0.0451456	-0.0148334	-0.0405161	-0.0206087	-0.0137134	-0.0546133	-0.0182237	-0.0198196	-0.0346691	0.0733135
704.228	30.9769	-0.0653657	-0.00166566	0.0237345	-0.0157174	-0.0553792	0.00952239	0.0636576	0.00692315	0.0313818	-0.012038	0.0126227	0.0532671	-0.145389	0.0658888	0.00616847	-0.0259283	0.0215346	0.00799927	-0.036068	0.0118453	-0.0315968	-0.0455867	-0.028109	-0.0433822	-0.0403462	-0.00377823	-0.0328458	-0.0135372	-0.00224269	-0.0239375	0.0139084	-0.00862094	-0.030169	-0.000305208	-0.0184987	-0.0540531	-0.00828045	-0.0408925	-0.0448981	-0.0145953	-0.0413056	-0.0200537	-0.0154198	-0.0513378	-0.0180636	-0.0203862	-0.0360205	0.0756873
707.468	31.031	-0.0715148	-0.00199385	0.0239625	-0.0192204	-0.053791	0.0115842	0.0622622	0.00915096	0.0326216	-0.0143661	0.014229	0.0511198	-0.14763	0.0661822	0.00614192	-0.0260931	0.0218964	0.00686756	-0.0350243	0.0125314	-0.0323078	-0.0441777	-0.0280781	-0.0450876	-0.0385903	-0.00500756	-0.0336625	-0.0134518	-0.00302059	-0.0242795	0.0137751	-0.0102726	-0.0297941	0.000595512	-0.0200351	-0.0533793	-0.00876441	-0.040939	-0.04456	-0.0143895	-0.042105	-0.0194942	-0.0171267	-0.0479923	-0.017911	-0.0209067	-0.0373029	0.0778857
710.743	31.0851	-0.0777663	-0.00218957	0.0239615	-0.0226412	-0.052099	0.013572	0.060984	0.0114041	0.0339074	-0.0164774	0.0158517	0.0489786	-0.149671	0.06636	0.00611222	-0.0262776	0.0219699	0.00569965	-0.0338423	0.0131544	-0.0329184	-0.0426695	-0.0280636	-0.0465587	-0.0368296	-0.00634145	-0.0343979	-0.0134313	-0.00389295	-0.024596	0.013594	-0.0119782	-0.0294335	0.00138788	-0.0215237	-0.0525462	-0.00929755	-0.0408308	-0.044124	-0.0142339	-0.0429114	-0.0189481	-0.0188225	-0.0446096	-0.0177657	-0.0213902	-0.0384895	0.0798957
714.005	31.1391	-0.0840893	-0.00223927	0.0237526	-0.0259712	-0.0503066	0.0154759	0.0598043	0.013682	0.0352068	-0.0183808	0.0174809	0.046833	-0.151508	0.0664173	0.0060795	-0.0264878	0.0217732	0.00449759	-0.0325227	0.0137052	-0.0334382	-0.041072	-0.0280807	-0.0477818	-0.0350751	-0.00778852	-0.0350555	-0.0134536	-0.00486955	-0.0248807	0.0133667	-0.0137282	-0.029077	0.00206027	-0.0229543	-0.051542	-0.00987261	-0.0405951	-0.0435812	-0.0141442	-0.0437207	-0.0184336	-0.0204949	-0.0412189	-0.0176274	-0.0218468	-0.0395583	0.0817061
717.274	31.1932	-0.0904499	-0.00213381	0.023363	-0.0292019	-0.0484201	0.0172893	0.058704	0.0159879	0.036485	-0.0200883	0.0191082	0.0446722	-0.153135	0.0663506	0.00604391	-0.0267256	0.0213306	0.003265	-0.0310722	0.0141757	-0.0338794	-0.0393931	-0.0281466	-0.048749	-0.0333374	-0.00935339	-0.0356368	-0.0134937	-0.00595865	-0.0251284	0.0130915	-0.0155126	-0.0287124	0.00260314	-0.0243198	-0.0503622	-0.0104806	-0.0402653	-0.042922	-0.0141332	-0.0445276	-0.0179689	-0.022132	-0.0378469	-0.0174959	-0.0222868	-0.0404924	0.0833084
720.53	31.2473	-0.0968105	-0.00186788	0.0228247	-0.0323247	-0.0464492	0.0190083	0.057664	0.0183282	0.0377062	-0.0216139	0.0207282	0.0424872	-0.154551	0.0661598	0.00600561	-0.0269879	0.020672	0.00200695	-0.0295046	0.0145588	-0.0342551	-0.0376404	-0.0282808	-0.0494592	-0.0316269	-0.011035	-0.0361424	-0.0135244	-0.00716607	-0.0253346	0.0127644	-0.017321	-0.0283258	0.00301036	-0.0256144	-0.0490113	-0.011111	-0.0398786	-0.0421379	-0.0142123	-0.0453246	-0.0175713	-0.023722	-0.0345151	-0.0173722	-0.02272	-0.0412808	0.0846963
723.809	31.3014	-0.103131	-0.00143894	0.0221712	-0.0353314	-0.0444065	0.0206323	0.0566666	0.0207104	0.0388348	-0.0229734	0.0223382	0.0402712	-0.155759	0.065849	0.00596477	-0.027266	0.0198311	0.000729186	-0.0278392	0.0148487	-0.0345769	-0.0358217	-0.0285028	-0.0499193	-0.0299534	-0.0128269	-0.036572	-0.0135193	-0.00849378	-0.0254943	0.0123812	-0.0191423	-0.0279033	0.00327942	-0.0268328	-0.0475035	-0.0117524	-0.0394731	-0.041223	-0.0143923	-0.0461024	-0.0172558	-0.0252541	-0.0312409	-0.017258	-0.0231558	-0.0419188	0.0858653
727.028	31.3554	-0.109367	-0.000846793	0.0214358	-0.038215	-0.042307	0.0221636	0.0556958	0.0231412	0.0398374	-0.0241827	0.0239367	0.0380211	-0.156763	0.0654278	0.00592157	-0.0275458	0.0188438	-0.000561591	-0.0261	0.015041	-0.0348541	-0.0339461	-0.0288308	-0.0501435	-0.0283255	-0.0147175	-0.0369256	-0.0134543	-0.00993881	-0.0256016	0.0119389	-0.0209641	-0.0274314	0.00341152	-0.0279701	-0.0458623	-0.0123935	-0.0390848	-0.0401759	-0.0146828	-0.0468497	-0.0170337	-0.0267188	-0.028038	-0.0171563	-0.0236028	-0.0424074	0.0868128
730.26	31.4095	-0.115476	-9.36174e-05	0.0206488	-0.0409685	-0.0401663	0.023607	0.0547377	0.0256253	0.0406835	-0.0252579	0.0255226	0.0357372	-0.15757	0.0649109	0.00587623	-0.0278086	0.0177464	-0.00185725	-0.0243137	0.0151324	-0.0350932	-0.0320244	-0.0292801	-0.0501527	-0.0267501	-0.0166914	-0.0372037	-0.0133106	-0.0114928	-0.0256489	0.0114368	-0.0227741	-0.0268977	0.00341153	-0.0290208	-0.0441193	-0.0130215	-0.0387449	-0.0389996	-0.0150926	-0.0475538	-0.0169112	-0.0281095	-0.0249171	-0.0170715	-0.0240684	-0.042753	0.0875377
733.45	31.4636	-0.121413	0.000815543	0.0198364	-0.0435858	-0.0379998	0.0249695	0.0537807	0.0281634	0.0413463	-0.0262142	0.0270932	0.0334238	-0.158189	0.0643181	0.00582897	-0.0280325	0.0165728	-0.00314792	-0.0225087	0.0151225	-0.0352977	-0.0300703	-0.0298623	-0.0499726	-0.0252321	-0.0187305	-0.0374076	-0.0130755	-0.0131412	-0.0256277	0.0108762	-0.0245607	-0.0262922	0.00328826	-0.0299783	-0.0423119	-0.0136229	-0.0384779	-0.037702	-0.0156286	-0.0482002	-0.0168888	-0.0294231	-0.0218844	-0.0170097	-0.0245583	-0.0429681	0.0880401
736.694	31.5177	-0.12713	0.00187253	0.0190193	-0.0460607	-0.035822	0.0262597	0.0528177	0.0307523	0.0418032	-0.0270656	0.0286433	0.0310886	-0.15863	0.0636731	0.00578001	-0.0281946	0.0153541	-0.00442246	-0.0207135	0.0150129	-0.0354696	-0.0281015	-0.0305849	-0.0496315	-0.0237744	-0.0208163	-0.037539	-0.0127432	-0.0148624	-0.0255295	0.0102602	-0.0263134	-0.0256085	0.00305361	-0.0308352	-0.0404806	-0.0141846	-0.0383002	-0.0362961	-0.0162955	-0.0487731	-0.0169616	-0.0306609	-0.0189424	-0.0169778	-0.025075	-0.0430704	0.0883216
739.898	31.5717	-0.132584	0.00306703	0.0182121	-0.0483866	-0.0336454	0.0274844	0.0518447	0.0333853	0.0420356	-0.0278226	0.030164	0.0287415	-0.158905	0.0630027	0.00572958	-0.0282718	0.0141168	-0.00566837	-0.0189552	0.0148058	-0.0356097	-0.0261402	-0.0314498	-0.0491589	-0.0223782	-0.0229321	-0.0375994	-0.0123142	-0.0166286	-0.0253462	0.00959343	-0.0280218	-0.0248432	0.00272166	-0.0315836	-0.0386675	-0.0146956	-0.0382197	-0.0347995	-0.0170949	-0.0492557	-0.0171203	-0.0318287	-0.0160885	-0.0169841	-0.0256178	-0.0430825	0.0883848
743.146	31.6258	-0.13773	0.00438831	0.0174235	-0.0505564	-0.0314805	0.0286475	0.0508621	0.0360518	0.0420312	-0.0284927	0.0316414	0.0263938	-0.159028	0.0623343	0.0056779	-0.0282413	0.0128826	-0.00687136	-0.0172565	0.0145024	-0.0357183	-0.0242121	-0.0324536	-0.0485827	-0.0210441	-0.0250649	-0.0375898	-0.0117949	-0.0184063	-0.0250702	0.00888353	-0.0296756	-0.023998	0.00230651	-0.032216	-0.0369136	-0.015149	-0.0382375	-0.0332351	-0.0180244	-0.0496311	-0.017353	-0.0329357	-0.0133156	-0.0170371	-0.0261819	-0.0430293	0.0882347
746.449	31.6799	-0.14253	0.00582518	0.0166568	-0.0525618	-0.0293348	0.029747	0.0498751	0.0387379	0.0417837	-0.0290792	0.0330561	0.0240572	-0.15901	0.061695	0.0056252	-0.0280819	0.0116686	-0.00801639	-0.0156346	0.0141012	-0.035795	-0.0223455	-0.0335864	-0.0479299	-0.0197735	-0.0272052	-0.0375099	-0.0111956	-0.0201594	-0.0246944	0.00813931	-0.0312638	-0.023079	0.00182039	-0.032726	-0.0352573	-0.015543	-0.0383486	-0.0316294	-0.0190776	-0.0498846	-0.0176466	-0.0339935	-0.0106131	-0.0171453	-0.0267591	-0.0429369	0.0878779
749.772	31.734	-0.146949	0.00736682	0.0159107	-0.054394	-0.0272122	0.0307757	0.0488927	0.0414265	0.0412939	-0.0295814	0.0343844	0.0217445	-0.158865	0.0611098	0.00557167	-0.0277755	0.010487	-0.00908864	-0.0140992	0.0135963	-0.0358374	-0.0205694	-0.034833	-0.0472261	-0.0185695	-0.0293457	-0.0373571	-0.0105294	-0.021852	-0.0242127	0.00737085	-0.0327749	-0.0220967	0.00127228	-0.0331087	-0.0337322	-0.0158806	-0.0385426	-0.0300112	-0.0202435	-0.0500053	-0.0179885	-0.0350146	-0.00796935	-0.0173173	-0.0273385	-0.04283	0.0873219
753.005	31.788	-0.15096	0.00900313	0.0151786	-0.0560463	-0.025115	0.0317222	0.0479276	0.0440981	0.0405684	-0.0299948	0.0356026	0.0194702	-0.1586	0.0605997	0.00551753	-0.0273086	0.00934591	-0.0100747	-0.0126535	0.0129764	-0.0358423	-0.0189128	-0.036174	-0.0464943	-0.0174377	-0.031479	-0.0371252	-0.00981176	-0.0234525	-0.0236212	0.00658875	-0.0341964	-0.0210639	0.00066783	-0.0333611	-0.0323657	-0.0161696	-0.038806	-0.0284098	-0.0215076	-0.0499864	-0.0183675	-0.0360122	-0.00537313	-0.0175612	-0.0279079	-0.0427309	0.0865747
756.267	31.8421	-0.154546	0.0107247	0.0144493	-0.0575143	-0.0230448	0.0325722	0.0469953	0.046732	0.03962	-0.0303115	0.0366902	0.0172504	-0.158223	0.0601802	0.00546296	-0.0266722	0.0082489	-0.0109635	-0.0112933	0.0122263	-0.035805	-0.0174022	-0.0375882	-0.0457542	-0.0163854	-0.0335973	-0.0368059	-0.00905857	-0.0249351	-0.0229177	0.00580357	-0.0355146	-0.0199948	9.97033e-06	-0.033482	-0.031177	-0.016422	-0.0391218	-0.0268545	-0.0228529	-0.0498253	-0.0187736	-0.0369984	-0.00281683	-0.0178839	-0.0284554	-0.0426573	0.0856452
759.483	31.8962	-0.157694	0.0125227	0.0137061	-0.0587987	-0.0210031	0.0333089	0.0461126	0.0493065	0.0384664	-0.0305216	0.0376328	0.0151034	-0.157735	0.0598618	0.00540814	-0.0258637	0.0071952	-0.0117475	-0.0100083	0.01133	-0.03572	-0.0160605	-0.0390548	-0.045022	-0.0154211	-0.0356913	-0.0363894	-0.00828457	-0.0262815	-0.0221022	0.00502513	-0.0367164	-0.0189038	-0.000700524	-0.0334719	-0.0301765	-0.0166534	-0.0394707	-0.0253728	-0.0242607	-0.049523	-0.0191986	-0.0379839	-0.000297839	-0.0182897	-0.028972	-0.0426214	0.0845421
762.742	31.9503	-0.160399	0.0143873	0.0129287	-0.0599047	-0.018992	0.0339134	0.0452965	0.0517995	0.0371297	-0.0306138	0.0384233	0.0130477	-0.157137	0.0596497	0.00535323	-0.0248875	0.00617864	-0.0124232	-0.0087813	0.0102742	-0.0355809	-0.0149047	-0.0405545	-0.0443094	-0.0145524	-0.0377497	-0.0358675	-0.00750273	-0.0274812	-0.0211771	0.00426166	-0.037791	-0.0178037	-0.00146526	-0.033333	-0.0293647	-0.016882	-0.0398306	-0.0239889	-0.0257107	-0.0490842	-0.0196346	-0.0389777	0.00218102	-0.01878	-0.0294527	-0.0426295	0.0832744
765.948	32.0043	-0.162662	0.0163089	0.0120948	-0.0608423	-0.017014	0.0343629	0.0445623	0.0541894	0.0356342	-0.0305752	0.0390618	0.0111016	-0.156425	0.0595445	0.00529836	-0.023755	0.00518928	-0.0129917	-0.00758951	0.00905109	-0.035381	-0.0139447	-0.0420704	-0.0436233	-0.0137847	-0.0397601	-0.0352347	-0.00672441	-0.0285312	-0.0201473	0.00351885	-0.0387307	-0.016706	-0.00228787	-0.033069	-0.0287319	-0.0171271	-0.0401783	-0.0227236	-0.0271801	-0.0485167	-0.0200738	-0.0399858	0.0046121	-0.019353	-0.0298979	-0.0426815	0.0818505
769.182	32.0584	-0.164488	0.0182773	0.0111822	-0.0616248	-0.0150723	0.0346324	0.0439224	0.0564548	0.0340046	-0.0303921	0.0395542	0.00928169	-0.155594	0.0595416	0.00524369	-0.0224849	0.00421365	-0.0134578	-0.00640605	0.00765827	-0.0351151	-0.0131821	-0.0435889	-0.0429636	-0.0131205	-0.0417099	-0.0344886	-0.00596023	-0.0294349	-0.019021	0.00279881	-0.0395316	-0.01562	-0.00317387	-0.0326865	-0.028259	-0.0174077	-0.0404906	-0.0215922	-0.0286431	-0.0478311	-0.0205084	-0.0410113	0.00698376	-0.0200045	-0.0303118	-0.0427724	0.0802785
772.441	32.1125	-0.16589	0.0202813	0.0101707	-0.0622658	-0.0131703	0.0346947	0.0433863	0.0585763	0.0322635	-0.0300497	0.0399115	0.00760108	-0.154638	0.0596324	0.00518931	-0.0211012	0.00323557	-0.0138299	-0.00520268	0.00609899	-0.0347807	-0.0126102	-0.0450991	-0.0423237	-0.0125595	-0.0435878	-0.0336298	-0.00521946	-0.0302023	-0.0178103	0.00209802	-0.0401941	-0.0145537	-0.00412933	-0.0321954	-0.0279184	-0.0177415	-0.0407461	-0.0206045	-0.0300721	-0.0470392	-0.020931	-0.0420542	0.00928089	-0.0207268	-0.0307013	-0.0428921	0.078565
775.727	32.1665	-0.166881	0.0223096	0.00904363	-0.0627769	-0.0113115	0.0345239	0.0429607	0.0605374	0.0304323	-0.029533	0.0401489	0.00606998	-0.153553	0.0598048	0.00513534	-0.0196328	0.00223705	-0.0141185	-0.00395215	0.00438206	-0.0343784	-0.0122142	-0.0465939	-0.0416907	-0.012099	-0.045384	-0.03266	-0.00450892	-0.0308488	-0.0165305	0.00140727	-0.0407224	-0.013514	-0.00516017	-0.0316087	-0.0276762	-0.0181446	-0.040928	-0.019764	-0.0314387	-0.0461544	-0.0213368	-0.0431115	0.0114836	-0.0215097	-0.031074	-0.0430263	0.0767154
778.951	32.2206	-0.16748	0.02435	0.00778866	-0.0631672	-0.00949964	0.0340967	0.0426504	0.0623257	0.0285321	-0.0288274	0.0402868	0.00469735	-0.152331	0.0600455	0.00508187	-0.0181099	0.00119979	-0.0143351	-0.00263134	0.00252126	-0.0339136	-0.0119727	-0.0480691	-0.0410471	-0.0117348	-0.0470887	-0.031582	-0.00383194	-0.0313948	-0.0151998	0.000711609	-0.0411239	-0.0125072	-0.00627151	-0.0309414	-0.0274958	-0.0186299	-0.041025	-0.0190688	-0.032716	-0.0451897	-0.0217242	-0.0441763	0.0135675	-0.0223408	-0.031437	-0.0431577	0.0747345
782.197	32.2747	-0.167707	0.0263898	0.00639715	-0.0634441	-0.00773929	0.0333947	0.0424593	0.0639347	0.0265855	-0.0279199	0.0403497	0.00349135	-0.150967	0.0603409	0.00502899	-0.0165627	0.000106655	-0.0144919	-0.00122336	0.000533617	-0.0333938	-0.0118584	-0.0495228	-0.0403719	-0.0114614	-0.0486926	-0.0303993	-0.00318899	-0.0318642	-0.0138382	-8.58967e-06	-0.041407	-0.0115392	-0.00746774	-0.030211	-0.0273405	-0.0192059	-0.0410319	-0.0185113	-0.0338795	-0.0441578	-0.022095	-0.0452386	0.0155037	-0.0232061	-0.0317967	-0.0432671	0.0726261
785.418	32.3288	-0.167589	0.0284146	0.00486347	-0.0636143	-0.00603694	0.0324052	0.0423917	0.0653637	0.0246181	-0.0268001	0.0403653	0.00246084	-0.149457	0.0606777	0.00497679	-0.0150192	-0.00105739	-0.0146019	0.000280316	-0.00156193	-0.0328268	-0.0118399	-0.0509532	-0.039643	-0.011272	-0.0501854	-0.0291169	-0.00257896	-0.0322823	-0.0124671	-0.000776318	-0.0415798	-0.0106156	-0.00875209	-0.029438	-0.0271761	-0.0198759	-0.0409498	-0.0180796	-0.0349083	-0.0430713	-0.0224539	-0.0462858	0.0172583	-0.0240904	-0.0321578	-0.043335	0.0703923
788.682	32.3828	-0.167154	0.0304086	0.0031845	-0.0636842	-0.00440155	0.0311219	0.0424517	0.066617	0.022659	-0.0254605	0.0403628	0.0016163	-0.147799	0.0610424	0.00492531	-0.0135058	-0.00230504	-0.0146781	0.00187943	-0.00374356	-0.0322191	-0.0118827	-0.0523581	-0.038838	-0.011159	-0.0515565	-0.0277425	-0.00200048	-0.0326739	-0.011108	-0.00161523	-0.0416506	-0.00974094	-0.0101252	-0.0286446	-0.0269735	-0.0206366	-0.0407845	-0.017758	-0.0357865	-0.0419428	-0.0228069	-0.0473027	0.0187936	-0.0249774	-0.0325238	-0.0433414	0.068034
791.98	32.4369	-0.166431	0.0323537	0.00135882	-0.0636599	-0.00284631	0.0295462	0.0426435	0.0677029	0.0207408	-0.0238977	0.0403721	0.000969469	-0.145995	0.0614219	0.00487458	-0.012047	-0.0036461	-0.0147324	0.00356516	-0.00598423	-0.0315747	-0.0119506	-0.0537336	-0.0379364	-0.0111128	-0.0527954	-0.026287	-0.00145364	-0.0330619	-0.00978328	-0.00254767	-0.0416286	-0.00891784	-0.0115834	-0.0278527	-0.0267103	-0.0214786	-0.0405456	-0.0175292	-0.036504	-0.040784	-0.0231601	-0.048272	0.0200696	-0.0258508	-0.032897	-0.0432681	0.065551
795.279	32.491	-0.165449	0.034229	-0.000613302	-0.0635472	-0.00138719	0.0276868	0.0429702	0.0686322	0.0188975	-0.0221118	0.0404224	0.00053242	-0.14405	0.0618035	0.00482458	-0.0106659	-0.00508801	-0.0147744	0.00532117	-0.00825085	-0.0308955	-0.0120086	-0.0550746	-0.0369203	-0.0111212	-0.053893	-0.0247661	-0.00094146	-0.0334658	-0.00851439	-0.00359301	-0.041524	-0.00814705	-0.0131186	-0.0270826	-0.0263717	-0.0223863	-0.0402433	-0.0173751	-0.0370569	-0.0396048	-0.0235188	-0.0491755	0.0210436	-0.0266944	-0.0332773	-0.0431001	0.0629423
798.397	32.5451	-0.164233	0.0360101	-0.0027304	-0.0633513	-4.22093e-05	0.0255582	0.0434324	0.0694169	0.0171638	-0.0201068	0.0405402	0.000316242	-0.141972	0.062176	0.00477531	-0.00938511	-0.00663651	-0.0148111	0.00712543	-0.0105045	-0.0301806	-0.0120254	-0.0563733	-0.0357752	-0.0111699	-0.0548438	-0.0232012	-0.000471612	-0.0339	-0.00732192	-0.00476639	-0.0413475	-0.00742733	-0.0147177	-0.0263507	-0.0259503	-0.0233392	-0.0398866	-0.0172779	-0.0374461	-0.0384125	-0.023886	-0.049995	0.0216765	-0.0274929	-0.0336622	-0.0428272	0.0602053
801.517	32.5991	-0.16281	0.0376703	-0.00498939	-0.063075	0.00117043	0.0231792	0.0440276	0.0700673	0.015572	-0.01789	0.0407459	0.000329972	-0.139772	0.0625291	0.00472672	-0.00822675	-0.00829652	-0.0148467	0.00895286	-0.0127023	-0.0294267	-0.0119747	-0.0576195	-0.0344897	-0.0112428	-0.0556476	-0.0216179	-5.67931e-05	-0.0343722	-0.00622548	-0.00607783	-0.0411111	-0.00675616	-0.0163632	-0.0256693	-0.0254448	-0.0243129	-0.0394819	-0.0172209	-0.0376765	-0.037212	-0.0242616	-0.0507141	0.0219353	-0.0282314	-0.0340458	-0.0424451	0.0573367
804.874	32.6532	-0.161202	0.0391825	-0.00738424	-0.0627169	0.00223383	0.020571	0.0447491	0.0705916	0.01415	-0.0154713	0.0410519	0.000580058	-0.13746	0.0628546	0.00467879	-0.00721329	-0.0100731	-0.0148829	0.0107766	-0.0148001	-0.0286286	-0.0118362	-0.0587992	-0.0330553	-0.0113228	-0.0563085	-0.0200426	0.000284988	-0.0348837	-0.0052442	-0.00753268	-0.0408288	-0.00613147	-0.0180342	-0.0250468	-0.0248598	-0.0252815	-0.0390329	-0.0171895	-0.0377554	-0.0360064	-0.0246423	-0.0513177	0.0217931	-0.028897	-0.0344193	-0.0419554	0.0543334
808.263	32.7073	-0.159431	0.0405207	-0.00990413	-0.0622698	0.00313398	0.0177565	0.0455887	0.0709952	0.0129209	-0.012862	0.0414612	0.00107006	-0.135048	0.0631451	0.0046315	-0.00636747	-0.0119715	-0.0149203	0.0125695	-0.0167561	-0.0277799	-0.0115958	-0.0598957	-0.0314667	-0.011393	-0.0568341	-0.0185001	0.000531867	-0.0354296	-0.00439689	-0.00913148	-0.0405157	-0.00555227	-0.0197073	-0.0244878	-0.0242052	-0.0262192	-0.0385401	-0.0171703	-0.037691	-0.0347973	-0.0250233	-0.0517921	0.0212295	-0.0294794	-0.0347709	-0.0413654	0.0511913
811.498	32.7614	-0.157514	0.0416627	-0.0125335	-0.0617221	0.00385983	0.0147599	0.0465364	0.0712824	0.0119018	-0.0100747	0.0419688	0.00180123	-0.132547	0.0633942	0.00458482	-0.00571089	-0.0139968	-0.0149581	0.0143036	-0.0185363	-0.0268746	-0.0112469	-0.06089	-0.0297209	-0.0114385	-0.0572336	-0.017011	0.000660408	-0.0360002	-0.00370156	-0.0108704	-0.0401857	-0.00501939	-0.0213578	-0.023994	-0.0234974	-0.0271021	-0.0380033	-0.0171519	-0.0374927	-0.0335846	-0.0253997	-0.0521237	0.0202291	-0.0299716	-0.0350859	-0.0406862	0.0479063
814.759	32.8154	-0.155467	0.0425918	-0.015253	-0.0610584	0.00440243	0.0116072	0.0475825	0.0714576	0.0111045	-0.00712369	0.0425623	0.00277257	-0.129963	0.0635954	0.00453871	-0.00526296	-0.016153	-0.014995	0.0159521	-0.0201165	-0.0259072	-0.0107912	-0.0617611	-0.0278172	-0.0114484	-0.0575193	-0.0155918	0.000648536	-0.0365827	-0.00317336	-0.0127416	-0.0398498	-0.00453631	-0.0229604	-0.0235644	-0.0227578	-0.0279098	-0.037421	-0.0171255	-0.037171	-0.032367	-0.025768	-0.0522999	0.0187813	-0.0303708	-0.0353471	-0.039932	0.0444747
817.859	32.8695	-0.153301	0.0432967	-0.0180417	-0.0602636	0.00475448	0.00832403	0.0487179	0.0715266	0.0105353	-0.00402471	0.0432238	0.00398096	-0.127298	0.0637428	0.00449315	-0.00503917	-0.0184423	-0.0150279	0.0174912	-0.0214833	-0.024873	-0.0102386	-0.0624885	-0.0257588	-0.0114174	-0.0577048	-0.0142548	0.000478409	-0.0371626	-0.00282254	-0.0147338	-0.0395142	-0.00410822	-0.0244911	-0.0231954	-0.0220113	-0.0286276	-0.0367914	-0.0170855	-0.0367377	-0.0311437	-0.0261262	-0.0523098	0.0168791	-0.0306785	-0.0355364	-0.0391172	0.0408934
820.955	32.9236	-0.151026	0.0437726	-0.0208778	-0.0593238	0.00491002	0.00493563	0.0499347	0.0714945	0.0101956	-0.000795252	0.0439306	0.00542178	-0.12455	0.0638304	0.0044481	-0.0050507	-0.0208642	-0.0150532	0.0189021	-0.0226333	-0.0237674	-0.00960536	-0.063054	-0.023553	-0.011346	-0.0578033	-0.0130085	0.000137853	-0.0377258	-0.0026536	-0.0168322	-0.0391805	-0.0037404	-0.0259283	-0.02288	-0.021284	-0.0292463	-0.0361119	-0.0170291	-0.0362063	-0.0299164	-0.0264735	-0.0521444	0.0145209	-0.0309006	-0.035638	-0.0382566	0.0371603
824.225	32.9776	-0.148645	0.044023	-0.0237402	-0.0582284	0.00486367	0.00146391	0.0512259	0.0713648	0.010081	0.00254649	0.0446564	0.00708812	-0.121717	0.0638515	0.00440351	-0.00530409	-0.0234154	-0.0150678	0.0201716	-0.0235707	-0.0225856	-0.00891073	-0.0634425	-0.021211	-0.0112393	-0.0578261	-0.011859	-0.000380312	-0.0382598	-0.00266576	-0.0190175	-0.0388455	-0.00343556	-0.0272548	-0.0226082	-0.0206006	-0.0297611	-0.0353791	-0.0169551	-0.0355908	-0.028689	-0.0268089	-0.0517978	0.0117132	-0.0310465	-0.0356407	-0.0373651	0.0332747
827.447	33.0317	-0.146155	0.0440601	-0.0266084	-0.0569695	0.0046116	-0.00207244	0.0525844	0.0711382	0.0101804	0.00598212	0.045372	0.00897047	-0.11879	0.0637997	0.00435936	-0.00580116	-0.0260892	-0.01507	0.0212923	-0.0243057	-0.0213239	-0.00817522	-0.0636443	-0.0187467	-0.0111072	-0.057782	-0.0108118	-0.00107939	-0.0387543	-0.0028537	-0.0212663	-0.0385027	-0.00319307	-0.0284593	-0.0223678	-0.0199829	-0.0301725	-0.0345889	-0.0168625	-0.0349045	-0.027467	-0.02713	-0.0512673	0.00847263	-0.0311271	-0.03554	-0.0364571	0.0292374
830.762	33.0858	-0.14355	0.0439054	-0.0294616	-0.0555398	0.00415297	-0.00565877	0.0540026	0.0708095	0.0104754	0.00949306	0.0460471	0.0110557	-0.115765	0.0636705	0.00431564	-0.00653953	-0.0288768	-0.0150607	0.0222619	-0.0248528	-0.0199803	-0.00741866	-0.0636557	-0.0161755	-0.010962	-0.0576763	-0.00987122	-0.00195867	-0.039202	-0.00320872	-0.0235519	-0.0381455	-0.00300881	-0.0295375	-0.0221439	-0.0194479	-0.0304855	-0.0337364	-0.0167513	-0.03416	-0.0262567	-0.027433	-0.0505537	0.00482371	-0.0311537	-0.0353381	-0.0355463	0.0250504
834.069	33.1399	-0.140814	0.0435902	-0.0322776	-0.0539306	0.00349122	-0.00928328	0.0554717	0.0703672	0.010939	0.0130606	0.0466517	0.013327	-0.112636	0.063462	0.00427233	-0.00751253	-0.0317666	-0.0150429	0.0230822	-0.0252301	-0.018556	-0.00666043	-0.0634811	-0.0135138	-0.0108179	-0.0575111	-0.00903921	-0.00301289	-0.0395979	-0.00371898	-0.0258448	-0.0377675	-0.00287589	-0.030492	-0.0219204	-0.0190081	-0.0307104	-0.0328174	-0.0166227	-0.0333691	-0.0250645	-0.0277134	-0.0496608	0.000798493	-0.0311368	-0.0350439	-0.0346444	0.0207181
837.408	33.1939	-0.137929	0.0431541	-0.0350327	-0.052134	0.00263447	-0.0129371	0.0569819	0.0697955	0.0115352	0.0166666	0.0471578	0.0157637	-0.1094	0.0631765	0.00422942	-0.00870748	-0.0347441	-0.0150219	0.0237581	-0.0254584	-0.0170575	-0.00592043	-0.0631323	-0.0107787	-0.010689	-0.0572852	-0.00831471	-0.00423234	-0.0399396	-0.00437011	-0.0281137	-0.0373645	-0.00278544	-0.031332	-0.0216814	-0.0186712	-0.0308636	-0.0318305	-0.0164799	-0.0325431	-0.0238965	-0.0279669	-0.0485945	-0.00356633	-0.0310859	-0.0346723	-0.0337596	0.016248
840.708	33.248	-0.134871	0.0426437	-0.0377012	-0.050143	0.00159511	-0.0166138	0.0585238	0.0690763	0.0122209	0.0202933	0.0475406	0.0183421	-0.106057	0.0628205	0.00418691	-0.0101045	-0.037791	-0.0150039	0.0242951	-0.0255606	-0.0154979	-0.00521914	-0.0626279	-0.00798751	-0.0105885	-0.0569948	-0.00769326	-0.0056029	-0.040226	-0.00514521	-0.030327	-0.0369327	-0.00272796	-0.0320719	-0.0214135	-0.0184398	-0.0309668	-0.0307786	-0.0163277	-0.0316934	-0.0227577	-0.0281914	-0.0473632	-0.00823298	-0.0310096	-0.0342425	-0.0328965	0.0116509
843.926	33.3021	-0.131614	0.0421091	-0.0402559	-0.0479531	0.00038939	-0.0203079	0.0600892	0.0681927	0.0129485	0.0239236	0.0477789	0.0210357	-0.102611	0.0624055	0.0041448	-0.0116751	-0.0408858	-0.0149948	0.024698	-0.0255627	-0.013896	-0.0045776	-0.0619919	-0.00515865	-0.0105292	-0.0566339	-0.00716644	-0.00710603	-0.0404565	-0.0060253	-0.0324543	-0.0364692	-0.00269457	-0.0327296	-0.0211071	-0.0183125	-0.0310455	-0.02967	-0.0161724	-0.0308314	-0.0216531	-0.0283875	-0.0459782	-0.0131632	-0.0309154	-0.0337757	-0.0320564	0.00694072
847.113	33.3562	-0.128133	0.0416009	-0.0426696	-0.0455638	-0.000964059	-0.0240143	0.0616699	0.0671303	0.0136693	0.0275406	0.0478556	0.0238171	-0.0990697	0.061947	0.00410308	-0.0133826	-0.0440041	-0.0149991	0.0249687	-0.0254923	-0.0122752	-0.00401697	-0.0612516	-0.002312	-0.0105231	-0.0561949	-0.00672135	-0.0087182	-0.0406304	-0.00698851	-0.0344674	-0.035971	-0.00267774	-0.0333242	-0.0207572	-0.018285	-0.0311263	-0.0285194	-0.016021	-0.0299701	-0.0205878	-0.0285605	-0.0444536	-0.0183182	-0.0308106	-0.0332939	-0.0312378	0.00213472
850.391	33.4102	-0.124399	0.0411658	-0.0449159	-0.0429789	-0.00244637	-0.0277274	0.0632584	0.065878	0.0143363	0.031127	0.0477579	0.026659	-0.0954452	0.0614636	0.00406176	-0.0151835	-0.0471189	-0.0150187	0.0251078	-0.0253762	-0.0106614	-0.00355824	-0.0604359	0.000530213	-0.0105813	-0.055668	-0.00634132	-0.0104105	-0.0407488	-0.00801043	-0.0363419	-0.0354338	-0.00267177	-0.0338751	-0.0203628	-0.0183511	-0.031235	-0.0273469	-0.0158812	-0.0291235	-0.0195673	-0.0287189	-0.0428057	-0.0236597	-0.0307024	-0.0328183	-0.0304373	-0.00274669
853.652	33.4643	-0.120387	0.040844	-0.0469709	-0.0402087	-0.00404044	-0.0314409	0.0648461	0.0644291	0.0149072	0.034666	0.0474783	0.0295351	-0.091754	0.0609767	0.00402081	-0.0170292	-0.050201	-0.0150527	0.0251146	-0.0252389	-0.00908115	-0.00322268	-0.0595741	0.00334283	-0.0107132	-0.0550422	-0.00600777	-0.0121496	-0.0408146	-0.00906427	-0.0380568	-0.0348528	-0.00267239	-0.0344008	-0.0199252	-0.0185053	-0.031395	-0.0261763	-0.0157598	-0.0283061	-0.0185976	-0.0288737	-0.0410528	-0.0291488	-0.030599	-0.0323674	-0.0296507	-0.00768039
856.843	33.5184	-0.116071	0.0406666	-0.0488143	-0.0372692	-0.00573227	-0.0351481	0.0664241	0.0627818	0.0153461	0.0381406	0.0470144	0.0324206	-0.0880153	0.0605095	0.00398025	-0.0188691	-0.0532194	-0.0150986	0.0249872	-0.0251024	-0.00755937	-0.00303187	-0.0586939	0.00609769	-0.0109262	-0.0543052	-0.00570353	-0.0139002	-0.0408333	-0.0101218	-0.0395952	-0.0342214	-0.00267714	-0.0349184	-0.0194473	-0.0187428	-0.0316252	-0.0250327	-0.0156627	-0.0275316	-0.0176845	-0.0290362	-0.039215	-0.0347439	-0.0305084	-0.0319562	-0.0288747	-0.0126416
860.036	33.5725	-0.111431	0.0406548	-0.050431	-0.0341815	-0.00751158	-0.0388417	0.0679832	0.0609379	0.015626	0.0415346	0.0463682	0.0352944	-0.0842509	0.0600868	0.00394005	-0.020653	-0.056143	-0.0151526	0.024724	-0.0249855	-0.00611786	-0.00300655	-0.0578202	0.00876422	-0.0112259	-0.0534444	-0.0054136	-0.0156276	-0.0408122	-0.0111557	-0.0409444	-0.0335327	-0.0026845	-0.035443	-0.0189321	-0.0190602	-0.0319392	-0.0239408	-0.0155938	-0.0268121	-0.0168337	-0.0292153	-0.0373139	-0.0403982	-0.0304382	-0.0315952	-0.0281086	-0.0176051
863.367	33.6265	-0.106452	0.0408205	-0.0518091	-0.0309693	-0.00937162	-0.042513	0.0695135	0.0589007	0.0157284	0.0448329	0.0455456	0.0381395	-0.080485	0.0597329	0.00390022	-0.0223338	-0.0589412	-0.0152108	0.0243229	-0.0249024	-0.0047755	-0.00316477	-0.0569739	0.011312	-0.0116155	-0.0524462	-0.00512559	-0.0173004	-0.0407599	-0.0121415	-0.0420953	-0.0327817	-0.00269447	-0.0359864	-0.0183821	-0.0194555	-0.0323461	-0.0229243	-0.0155553	-0.0261573	-0.0160506	-0.0294164	-0.0353721	-0.0460613	-0.0303945	-0.0312913	-0.0273545	-0.0225457
866.665	33.6806	-0.101124	0.0411676	-0.0529403	-0.0276574	-0.0113089	-0.0461517	0.071005	0.0566747	0.0156438	0.0480215	0.0445561	0.0409436	-0.0767433	0.0594718	0.00386073	-0.0238692	-0.0615852	-0.0152706	0.0237803	-0.0248632	-0.0035486	-0.00352148	-0.0561716	0.0137116	-0.0120949	-0.0512963	-0.00482871	-0.0188912	-0.0406832	-0.0130598	-0.0430426	-0.0319657	-0.00270874	-0.0365568	-0.0177997	-0.0199288	-0.0328515	-0.022004	-0.0155486	-0.0255733	-0.0153406	-0.0296411	-0.0334133	-0.0516812	-0.0303819	-0.0310483	-0.0266172	-0.0274391
869.868	33.7347	-0.0954453	0.0416906	-0.0538187	-0.0242709	-0.0133223	-0.0497448	0.0724477	0.0542645	0.0153712	0.0510875	0.0434126	0.0436987	-0.0730519	0.0593261	0.00382157	-0.0252239	-0.0640493	-0.0153317	0.0230901	-0.0248746	-0.00245073	-0.00408854	-0.0554246	0.0159363	-0.0126602	-0.0499813	-0.00451372	-0.0203774	-0.040586	-0.0138972	-0.0437854	-0.0310857	-0.00273088	-0.0371575	-0.0171866	-0.0204841	-0.0334572	-0.0211969	-0.0155756	-0.0250632	-0.0147082	-0.0298884	-0.031462	-0.0572075	-0.0304038	-0.0308659	-0.0259023	-0.0322619
873.012	33.7888	-0.0894201	0.042374	-0.0544429	-0.0208356	-0.0154119	-0.0532755	0.0738325	0.0516768	0.0149185	0.0540196	0.0421295	0.0463995	-0.0694362	0.0593164	0.00378268	-0.0263705	-0.0663121	-0.0153951	0.022245	-0.0249407	-0.00149234	-0.00487656	-0.0547375	0.0179621	-0.013305	-0.0484921	-0.00417376	-0.0217417	-0.0404671	-0.0146467	-0.0443269	-0.0301451	-0.00276806	-0.037787	-0.0165447	-0.0211277	-0.0341618	-0.0205153	-0.0156404	-0.0246268	-0.0141578	-0.0301559	-0.0295427	-0.0625924	-0.0304634	-0.0307392	-0.0252156	-0.0369919
876.298	33.8428	-0.0830627	0.04319	-0.0548159	-0.0173776	-0.0175795	-0.0567226	0.0751504	0.0489223	0.0143023	0.0568067	0.0407221	0.0490432	-0.0659186	0.0594607	0.00374401	-0.0272911	-0.0683563	-0.0154618	0.0212388	-0.025065	-0.000680722	-0.00589581	-0.0541085	0.0197679	-0.0140216	-0.0468257	-0.00380448	-0.0229709	-0.0403197	-0.0153063	-0.0446756	-0.0291499	-0.0028309	-0.0384394	-0.0158761	-0.0218675	-0.0349604	-0.0199662	-0.0157501	-0.0242604	-0.0136936	-0.030441	-0.0276796	-0.0677926	-0.0305641	-0.0306586	-0.0245623	-0.0416077
879.573	33.8969	-0.076396	0.0440978	-0.0549463	-0.0139226	-0.019829	-0.0600629	0.0763917	0.0460158	0.0135475	0.059439	0.0392064	0.05163	-0.0625174	0.0597729	0.00370548	-0.027978	-0.0701696	-0.0155322	0.020067	-0.0252494	-1.95516e-05	-0.00715479	-0.0535288	0.0213364	-0.0148018	-0.0449855	-0.00340547	-0.0240559	-0.0401337	-0.0158791	-0.044846	-0.0281061	-0.00293318	-0.0391035	-0.0151829	-0.0227117	-0.035843	-0.0195507	-0.0159133	-0.0239577	-0.0133192	-0.0307412	-0.0258942	-0.0727688	-0.0307097	-0.0306112	-0.0239473	-0.0460882
882.873	33.951	-0.0694508	0.0450466	-0.0548483	-0.0104946	-0.0221675	-0.0632723	0.0775468	0.0429768	0.0126861	0.0619085	0.0375985	0.0541633	-0.059247	0.0602613	0.00366698	-0.0284342	-0.0717439	-0.0156056	0.0187287	-0.0254945	0.000490697	-0.00865921	-0.0529824	0.0226557	-0.0156384	-0.042982	-0.00298115	-0.0249913	-0.0398971	-0.0163722	-0.0448588	-0.0270184	-0.00308987	-0.039765	-0.0144676	-0.0236666	-0.0367925	-0.0192647	-0.0161389	-0.0237093	-0.0130352	-0.0310546	-0.0242042	-0.0774841	-0.0309035	-0.0305817	-0.0233757	-0.0504127
886.144	34.005	-0.0622654	0.0459797	-0.0545415	-0.00711509	-0.0246039	-0.0663273	0.0786061	0.039828	0.0117542	0.0642094	0.0359154	0.0566503	-0.0561183	0.0609286	0.00362839	-0.0286727	-0.0730749	-0.0156804	0.0172261	-0.0257996	0.00085317	-0.0104098	-0.0524475	0.0237212	-0.0165268	-0.0408303	-0.0025411	-0.0257747	-0.0395967	-0.0167951	-0.04474	-0.0258899	-0.00331618	-0.0404082	-0.0137336	-0.0247358	-0.0377862	-0.0190989	-0.0164342	-0.0235034	-0.012839	-0.0313792	-0.0226226	-0.0819021	-0.031147	-0.0305555	-0.0228532	-0.0545623
889.345	34.0591	-0.0548857	0.0468383	-0.0540499	-0.00380089	-0.0271476	-0.0692056	0.0795614	0.0365944	0.0107911	0.0663384	0.0341743	0.0591019	-0.0531391	0.0617715	0.00358958	-0.0287165	-0.0741627	-0.0157552	0.0155647	-0.026164	0.00107465	-0.0123996	-0.0518977	0.0245366	-0.0174639	-0.0385483	-0.00209871	-0.0264064	-0.0392213	-0.0171595	-0.0445199	-0.0247231	-0.00362674	-0.0410198	-0.0129854	-0.0259191	-0.0387964	-0.0190386	-0.0168053	-0.0233248	-0.0127248	-0.0317134	-0.021158	-0.0859892	-0.031439	-0.0305197	-0.022386	-0.0585205
892.495	34.1132	-0.0473647	0.047565	-0.0533997	-0.000563427	-0.0298062	-0.0718871	0.0804062	0.0333006	0.00983696	0.0682956	0.0323926	0.0615308	-0.0503149	0.0627804	0.00355041	-0.028597	-0.0750105	-0.0158288	0.0137536	-0.026587	0.00116559	-0.0146126	-0.0513051	0.0251132	-0.0184491	-0.0361553	-0.00166913	-0.0268898	-0.0387623	-0.0174785	-0.0442307	-0.0235214	-0.0040343	-0.0415912	-0.0122288	-0.0272136	-0.039793	-0.0190635	-0.017257	-0.0231568	-0.0126851	-0.0320563	-0.0198144	-0.0897164	-0.031775	-0.0304649	-0.0219803	-0.0622725
895.788	34.1673	-0.0397619	0.0481069	-0.0526175	0.00259194	-0.0325838	-0.0743534	0.0811359	0.0299703	0.00893124	0.0700837	0.0305875	0.0639502	-0.0476487	0.0639394	0.00351073	-0.0283517	-0.0756247	-0.0159013	0.0118047	-0.0270671	0.00113964	-0.0170222	-0.0506436	0.0254687	-0.0194818	-0.033671	-0.00126749	-0.0272319	-0.0382142	-0.0177672	-0.0439053	-0.0222903	-0.00454898	-0.0421189	-0.0114715	-0.028613	-0.0407463	-0.0191489	-0.0177928	-0.0229829	-0.0127119	-0.0324082	-0.0185917	-0.0930642	-0.0321472	-0.0303865	-0.0216416	-0.0658063
899.065	34.2213	-0.0321411	0.0484182	-0.0517295	0.00566513	-0.03548	-0.0765884	0.0817486	0.0266258	0.0081112	0.071708	0.0287757	0.0663721	-0.0451421	0.0652269	0.00347038	-0.0280221	-0.0760145	-0.0159742	0.00973203	-0.0276005	0.00101309	-0.0195921	-0.049891	0.0256264	-0.020561	-0.0311143	-0.00090797	-0.0274434	-0.0375743	-0.0180426	-0.0435761	-0.0210383	-0.00517781	-0.0426033	-0.0107234	-0.0301068	-0.0416291	-0.0192671	-0.0184159	-0.0227882	-0.0127971	-0.0327705	-0.017485	-0.0960257	-0.0325448	-0.0302855	-0.0213743	-0.069113
902.323	34.2754	-0.024568	0.0484604	-0.0507617	0.00866068	-0.038487	-0.0785772	0.0822462	0.0232905	0.00741127	0.073176	0.0269741	0.0688059	-0.0427949	0.0666175	0.00342918	-0.027651	-0.0761925	-0.0160493	0.00755006	-0.02818	0.000803011	-0.0222772	-0.0490316	0.0256128	-0.0216849	-0.0285032	-0.000601948	-0.0275387	-0.0368417	-0.0183233	-0.0432736	-0.0197777	-0.00592518	-0.0430473	-0.00999575	-0.0316796	-0.0424177	-0.0193886	-0.0191293	-0.0225619	-0.0129325	-0.0331456	-0.0164851	-0.0986055	-0.0329545	-0.0301671	-0.0211817	-0.0721856
905.545	34.3295	-0.0171077	0.0482024	-0.0497395	0.0115859	-0.0415898	-0.0803074	0.082636	0.0199898	0.00686293	0.0744967	0.0251997	0.071259	-0.0406057	0.0680835	0.00338698	-0.0272804	-0.0761746	-0.0161279	0.00527362	-0.0287949	0.000525756	-0.0250267	-0.0480578	0.0254576	-0.022849	-0.0258542	-0.000357221	-0.0275344	-0.0360171	-0.0186278	-0.0430254	-0.0185249	-0.00679301	-0.0434551	-0.00930114	-0.0333111	-0.0430928	-0.0194845	-0.0199355	-0.0222989	-0.0131097	-0.0335369	-0.0155791	-0.100815	-0.0333612	-0.0300403	-0.0210658	-0.0750193
908.791	34.3836	-0.0098225	0.047619	-0.0486884	0.0144476	-0.0447665	-0.0817696	0.0829299	0.0167529	0.00649426	0.0756804	0.0234693	0.0737355	-0.0385722	0.069596	0.00334358	-0.0269494	-0.0759804	-0.0162097	0.00291863	-0.0294293	0.000195805	-0.0277875	-0.0469694	0.0251906	-0.0240455	-0.0231821	-0.00017783	-0.0274488	-0.0351025	-0.0189729	-0.0428541	-0.0172988	-0.00778011	-0.0438302	-0.00865388	-0.0349766	-0.04364	-0.0195289	-0.020837	-0.0220006	-0.0133205	-0.0339482	-0.0147524	-0.102667	-0.0337487	-0.0299158	-0.0210274	-0.0776112
911.989	34.4376	-0.00276939	0.0466909	-0.0476337	0.0172496	-0.0479898	-0.0829588	0.0831436	0.0136121	0.00632863	0.0767385	0.0217991	0.0762368	-0.0366917	0.0711268	0.00329884	-0.026693	-0.0756322	-0.016292	0.000502545	-0.0300633	-0.000174436	-0.0305077	-0.045773	0.0248412	-0.0252622	-0.020502	-6.43658e-05	-0.0273006	-0.0341014	-0.0193726	-0.0427773	-0.0161195	-0.00888159	-0.0441741	-0.00806937	-0.0366485	-0.04405	-0.0195004	-0.0218345	-0.0216736	-0.013557	-0.0343829	-0.0139905	-0.104176	-0.034101	-0.0298043	-0.0210656	-0.0799602
915.215	34.4917	0.00399982	0.0454041	-0.0466008	0.0199912	-0.0512295	-0.0838754	0.083294	0.0106024	0.00638397	0.0776816	0.0202044	0.078762	-0.0349625	0.0726496	0.0032526	-0.0265403	-0.0751547	-0.0163705	-0.001956	-0.0306735	-0.000573828	-0.0331385	-0.0444802	0.0244355	-0.0264841	-0.0178304	-1.60828e-05	-0.0271091	-0.0330199	-0.019837	-0.0428068	-0.0150078	-0.0100887	-0.0444842	-0.00756365	-0.0382966	-0.0443179	-0.0193834	-0.022927	-0.021328	-0.0138115	-0.0348435	-0.0132805	-0.105349	-0.0344022	-0.0297144	-0.0211772	-0.0820666
918.444	34.5458	0.0104406	0.043751	-0.0456143	0.0226674	-0.0544541	-0.084524	0.0833975	0.00775906	0.00667259	0.0785191	0.0186994	0.0813089	-0.0333841	0.0741416	0.00320472	-0.0265147	-0.0745741	-0.0164394	-0.00443754	-0.031234	-0.000991526	-0.035636	-0.0431051	0.0239965	-0.0276955	-0.0151858	-3.20499e-05	-0.0268945	-0.031868	-0.0203735	-0.042949	-0.0139836	-0.0113889	-0.0447535	-0.0071516	-0.0398899	-0.0444419	-0.0191688	-0.0241096	-0.0209754	-0.0140767	-0.0353317	-0.0126112	-0.106194	-0.034638	-0.0296499	-0.0213595	-0.083932
921.697	34.5999	0.016516	0.0417322	-0.0446958	0.0252712	-0.0576322	-0.084912	0.0834685	0.00511484	0.0072011	0.0792581	0.0172982	0.0838747	-0.0319576	0.0755837	0.00315509	-0.0266329	-0.0739177	-0.0164926	-0.00692248	-0.0317182	-0.00141685	-0.0379608	-0.0416622	0.0235427	-0.0288811	-0.0125887	-0.000112519	-0.0266773	-0.030661	-0.0209863	-0.0432039	-0.0130654	-0.0127668	-0.0449702	-0.00684567	-0.0413981	-0.0444234	-0.0188531	-0.025373	-0.0206266	-0.0143466	-0.0358478	-0.0119738	-0.10671	-0.0347957	-0.0296098	-0.0216113	-0.0855596
924.912	34.6539	0.0221969	0.0393583	-0.0438619	0.0277948	-0.0607323	-0.0850491	0.0835188	0.00269721	0.00797052	0.0799039	0.0160137	0.0864563	-0.0306862	0.0769619	0.00310358	-0.0269042	-0.0732128	-0.0165252	-0.00939223	-0.0320999	-0.00183996	-0.0400793	-0.0401647	0.0230888	-0.0300256	-0.0100607	-0.000258597	-0.026477	-0.0294179	-0.0216773	-0.0435664	-0.0122698	-0.0142051	-0.0451192	-0.00665569	-0.0427933	-0.0442667	-0.0184376	-0.0267045	-0.0202902	-0.0146179	-0.0363898	-0.0113626	-0.106895	-0.0348657	-0.029589	-0.0219334	-0.0869546
928.208	34.708	0.0274617	0.0366493	-0.0431231	0.0302294	-0.0637235	-0.0849441	0.0835584	0.000527469	0.00897657	0.0804605	0.0148574	0.0890498	-0.0295735	0.0782677	0.00305012	-0.0273316	-0.0724855	-0.0165351	-0.0118304	-0.0323553	-0.0022525	-0.0419641	-0.0386238	0.0226439	-0.031113	-0.00762353	-0.000471403	-0.0263113	-0.02816	-0.022447	-0.044025	-0.0116108	-0.0156866	-0.0451845	-0.00658938	-0.0440528	-0.0439776	-0.0179275	-0.0280885	-0.0199718	-0.0148918	-0.036953	-0.0107747	-0.106746	-0.0348428	-0.0295784	-0.0223294	-0.0881232
931.499	34.7621	0.0322939	0.0336331	-0.0424844	0.0325637	-0.0665758	-0.0846062	0.083596	-0.00137929	0.0102103	0.08093	0.0138382	0.0916504	-0.0286237	0.0795001	0.00299462	-0.0279123	-0.0717593	-0.0165225	-0.0142236	-0.0324643	-0.00264838	-0.043596	-0.037049	0.0222115	-0.032127	-0.00529725	-0.000750882	-0.0261959	-0.0269075	-0.0232944	-0.044562	-0.0110997	-0.0171954	-0.0451502	-0.00665341	-0.0451603	-0.0435647	-0.0173313	-0.029509	-0.0196727	-0.0151753	-0.0375298	-0.010211	-0.106256	-0.0347268	-0.0295653	-0.0228056	-0.089074
934.792	34.8161	0.036682	0.0303444	-0.0419441	0.0347829	-0.0692612	-0.0840411	0.0836384	-0.00301373	0.0116599	0.0813122	0.0129614	0.0942513	-0.0278404	0.0806658	0.002937	-0.0286385	-0.0710538	-0.0164904	-0.0165615	-0.0324118	-0.00302469	-0.0449661	-0.0354476	0.0217875	-0.0330517	-0.00309904	-0.00109638	-0.0261436	-0.0256781	-0.0242171	-0.0451523	-0.010743	-0.0187186	-0.0450015	-0.00685272	-0.0461064	-0.0430387	-0.0166605	-0.0309503	-0.0193913	-0.0154818	-0.0381078	-0.00967475	-0.10542	-0.0345218	-0.0295335	-0.0233716	-0.089817
938.032	34.8702	0.0406207	0.0268223	-0.0414953	0.0368691	-0.0717556	-0.0832538	0.0836901	-0.00437159	0.0133121	0.0816037	0.0122291	0.0968442	-0.0272261	0.0817781	0.00287718	-0.0294988	-0.0703834	-0.0164434	-0.0188369	-0.0321881	-0.00338181	-0.0460768	-0.0338238	0.0213616	-0.0338731	-0.00104331	-0.00150858	-0.0261648	-0.0244858	-0.0252093	-0.0457647	-0.0105412	-0.0202472	-0.0447227	-0.0071898	-0.0468881	-0.042412	-0.0159299	-0.0323969	-0.0191229	-0.0158279	-0.0386706	-0.00917075	-0.104234	-0.0342351	-0.0294644	-0.0240396	-0.0903632
941.228	34.9243	0.0441143	0.0231099	-0.0411258	0.0388028	-0.0740407	-0.0822466	0.0837507	-0.00545469	0.0151522	0.0817983	0.0116393	0.0994184	-0.0267825	0.0828555	0.0028151	-0.0304793	-0.0697572	-0.0163878	-0.0210444	-0.0317879	-0.00372309	-0.046942	-0.0321783	0.0209185	-0.0345806	0.000857536	-0.00199155	-0.0262678	-0.0233415	-0.0262622	-0.0463644	-0.0104872	-0.0217762	-0.0442972	-0.00766326	-0.0475081	-0.0416993	-0.0151559	-0.0338335	-0.0188607	-0.0162315	-0.0391975	-0.00870339	-0.102697	-0.0338757	-0.0293385	-0.0248229	-0.0907236
944.445	34.9784	0.0471755	0.0192527	-0.0408184	0.0405633	-0.0761055	-0.0810212	0.0838143	-0.00627113	0.0171623	0.0818869	0.0111867	0.101962	-0.0265103	0.0839196	0.00275073	-0.0315642	-0.0691783	-0.0163307	-0.0231793	-0.0312105	-0.00405378	-0.0475872	-0.0305076	0.0204418	-0.0351668	0.00259263	-0.00255252	-0.0264576	-0.0222515	-0.0273635	-0.0469164	-0.010567	-0.0233042	-0.043707	-0.00826727	-0.0479718	-0.0409162	-0.0143564	-0.035245	-0.0185948	-0.0167087	-0.0396655	-0.00827663	-0.10081	-0.0334534	-0.0291372	-0.025734	-0.0909096
947.696	35.0324	0.0498266	0.0152963	-0.0405516	0.0421312	-0.0779455	-0.0795784	0.0838682	-0.00683534	0.0193206	0.0818584	0.0108624	0.104463	-0.0264083	0.0849935	0.00268403	-0.0327376	-0.0686446	-0.0162803	-0.0252373	-0.0304611	-0.00438111	-0.0480463	-0.0288041	0.0199165	-0.0356289	0.00415308	-0.00320099	-0.0267357	-0.0212194	-0.0284985	-0.0473889	-0.010762	-0.024834	-0.0429359	-0.0089919	-0.0482875	-0.040079	-0.0135493	-0.0366167	-0.0183119	-0.0172733	-0.0400515	-0.0078942	-0.0985796	-0.0329785	-0.0288452	-0.0267822	-0.0909328
950.938	35.0865	0.0520968	0.0112862	-0.0402983	0.04349	-0.0795618	-0.0779188	0.0838937	-0.00716824	0.0215997	0.0817004	0.0106541	0.10691	-0.0264732	0.0861003	0.00261499	-0.0339841	-0.0681485	-0.0162451	-0.027215	-0.0295524	-0.00471376	-0.0483589	-0.0270576	0.0193313	-0.0359682	0.00553369	-0.00394724	-0.0270987	-0.0202467	-0.0296508	-0.0477567	-0.0110498	-0.0263703	-0.041972	-0.00982413	-0.0484664	-0.0392033	-0.0127499	-0.0379343	-0.0179967	-0.0179356	-0.0403356	-0.00755865	-0.0960151	-0.0324614	-0.0284527	-0.027973	-0.0908052
954.167	35.1406	0.0540214	0.0072675	-0.040026	0.0446285	-0.0809612	-0.0760429	0.0838676	-0.00729716	0.0239669	0.0813995	0.0105476	0.10929	-0.0266988	0.0872605	0.00254362	-0.035289	-0.0676771	-0.0162345	-0.0291114	-0.0285049	-0.00506172	-0.0485657	-0.025258	0.0186799	-0.0361907	0.00673476	-0.00479943	-0.027538	-0.0193337	-0.0308038	-0.0480019	-0.0114059	-0.0279194	-0.0408103	-0.0107492	-0.0485235	-0.0383036	-0.0119712	-0.0391854	-0.0176342	-0.018702	-0.0405026	-0.00726983	-0.0931339	-0.031913	-0.0279581	-0.0293061	-0.0905394
957.502	35.1947	0.0556403	0.00328572	-0.039697	0.0455423	-0.0821551	-0.0739507	0.0837635	-0.00725454	0.026385	0.0809419	0.010527	0.111589	-0.0270755	0.088491	0.0024699	-0.0366384	-0.0672134	-0.0162595	-0.0309298	-0.0273453	-0.00543561	-0.0487055	-0.023397	0.0179609	-0.0363067	0.00776238	-0.00576155	-0.0280382	-0.0184791	-0.0319417	-0.0481152	-0.0118044	-0.0294866	-0.0394541	-0.011752	-0.0484783	-0.0373935	-0.0112238	-0.0403595	-0.0172121	-0.019574	-0.0405438	-0.0070236	-0.0899616	-0.0313442	-0.0273689	-0.0307756	-0.0901483
960.811	35.2487	0.056997	-0.000614299	-0.0392718	0.0462337	-0.0831588	-0.0716426	0.0835545	-0.00707611	0.0288148	0.080313	0.0105757	0.113793	-0.0275909	0.0898048	0.00239385	-0.0380191	-0.0667376	-0.0163317	-0.0326785	-0.0261046	-0.00584735	-0.048813	-0.0214711	0.0171777	-0.0363303	0.00862878	-0.0068328	-0.0285774	-0.0176808	-0.033051	-0.0480955	-0.0122195	-0.0310756	-0.0379166	-0.012817	-0.0483534	-0.0364847	-0.0105162	-0.04145	-0.0167233	-0.0205485	-0.0404575	-0.00681109	-0.0865325	-0.0307656	-0.0267012	-0.0323696	-0.0896449
964.022	35.3028	0.0581349	-0.0043892	-0.0387115	0.0467109	-0.0839912	-0.0691207	0.083215	-0.006799	0.0312174	0.0794988	0.0106769	0.115882	-0.0282297	0.0912113	0.00231545	-0.039417	-0.0662277	-0.0164629	-0.0343706	-0.0248161	-0.00631012	-0.0489181	-0.0194833	0.0163366	-0.0362779	0.00935159	-0.00800725	-0.0291278	-0.0169347	-0.03412	-0.0479475	-0.0126262	-0.0326872	-0.0362207	-0.0139283	-0.0481732	-0.0355868	-0.00985659	-0.0424552	-0.0161685	-0.0216182	-0.040249	-0.00661908	-0.0828882	-0.0301879	-0.0259777	-0.0340713	-0.0890405
967.265	35.3569	0.0590945	-0.00799866	-0.0379806	0.0469866	-0.0846733	-0.0663897	0.0827233	-0.00645908	0.0335558	0.0784868	0.0108139	0.117835	-0.0289745	0.0927166	0.00223467	-0.0408172	-0.0656615	-0.0166631	-0.0360225	-0.0235114	-0.0068392	-0.0490456	-0.0174448	0.0154466	-0.0361661	0.00995322	-0.00927417	-0.0296572	-0.0162343	-0.035139	-0.0476802	-0.0130021	-0.0343181	-0.0343965	-0.0150704	-0.0479617	-0.0347081	-0.00925482	-0.0433769	-0.0155569	-0.0227726	-0.0399291	-0.00643245	-0.0790757	-0.0296222	-0.0252253	-0.0358589	-0.0883458
970.412	35.411	0.0599121	-0.0114071	-0.0370489	0.0470746	-0.0852278	-0.0634578	0.0820628	-0.00608979	0.035795	0.0772664	0.0109694	0.119626	-0.029807	0.0943233	0.00215148	-0.0422028	-0.0650175	-0.0169391	-0.0376516	-0.0222172	-0.00745164	-0.0492162	-0.0153749	0.0145175	-0.0360107	0.0104576	-0.0106189	-0.0301326	-0.0155696	-0.0360999	-0.0473047	-0.0133291	-0.0359599	-0.0324794	-0.0162283	-0.0477406	-0.0338568	-0.00872324	-0.0442206	-0.0149062	-0.0239975	-0.0395136	-0.00623708	-0.0751428	-0.029079	-0.0244739	-0.0377072	-0.0875709
973.63	35.465	0.0606192	-0.0145854	-0.0358939	0.0469878	-0.0856784	-0.0603378	0.0812233	-0.00572084	0.0379035	0.0758301	0.0111271	0.121229	-0.030708	0.0960313	0.00206585	-0.0435555	-0.0642766	-0.0172937	-0.0392747	-0.0209526	-0.00816523	-0.0494463	-0.0132994	0.0135591	-0.0358252	0.0108876	-0.012024	-0.0305232	-0.0149269	-0.0369966	-0.0468348	-0.0135953	-0.0375994	-0.0305061	-0.0173878	-0.0475267	-0.0330407	-0.00827717	-0.0449935	-0.0142412	-0.0252744	-0.0390213	-0.00602143	-0.0711352	-0.0285674	-0.0237528	-0.0395883	-0.0867242
976.917	35.5191	0.0612435	-0.0175116	-0.0345022	0.0467362	-0.0860491	-0.0570473	0.0801999	-0.00537736	0.0398529	0.0741738	0.0112735	0.122618	-0.0316583	0.097838	0.00197773	-0.0448558	-0.0634238	-0.0177254	-0.0409062	-0.0197287	-0.00899586	-0.049748	-0.0112486	0.0125804	-0.0356207	0.0112626	-0.0134709	-0.0308031	-0.0142905	-0.0378249	-0.0462867	-0.0137969	-0.0392193	-0.0285122	-0.0185347	-0.0473319	-0.032266	-0.00793434	-0.0457022	-0.0135913	-0.0265801	-0.0384732	-0.00577778	-0.0670903	-0.0280949	-0.023089	-0.0414748	-0.0858127
980.221	35.5732	0.0618087	-0.0201696	-0.0328695	0.046328	-0.0863623	-0.0536086	0.078993	-0.00507924	0.0416186	0.0722974	0.0114	0.123771	-0.0326388	0.0997385	0.00188706	-0.0460837	-0.0624491	-0.0182294	-0.0425572	-0.0185501	-0.00995615	-0.0501288	-0.00925332	0.0115886	-0.0354046	0.011596	-0.0149411	-0.0309526	-0.0136448	-0.0385823	-0.0456783	-0.0139377	-0.040799	-0.0265307	-0.0196547	-0.0471642	-0.0315366	-0.00771369	-0.0463519	-0.0129885	-0.0278878	-0.0378918	-0.00550198	-0.0630353	-0.0276669	-0.0225063	-0.0433409	-0.0848418
983.461	35.6273	0.0623334	-0.0225486	-0.0309984	0.0457705	-0.0866366	-0.050049	0.0776072	-0.00484067	0.0431788	0.0702047	0.0115034	0.124666	-0.0336307	0.101727	0.0017938	-0.0472179	-0.0613485	-0.0187987	-0.0442353	-0.0174182	-0.0110545	-0.050591	-0.00734314	0.0105895	-0.0351802	0.0118955	-0.0164157	-0.0309572	-0.0129749	-0.0392668	-0.0450286	-0.0140295	-0.0423157	-0.0245914	-0.0207357	-0.0470294	-0.030853	-0.00763331	-0.0469451	-0.0124645	-0.0291694	-0.0372996	-0.00519438	-0.0589842	-0.0272882	-0.0220241	-0.0451637	-0.0838149
986.731	35.6813	0.062829	-0.024642	-0.0288982	0.0450708	-0.0868851	-0.0463992	0.0760519	-0.00466926	0.0445147	0.0679038	0.011586	0.125289	-0.0346161	0.103795	0.0016979	-0.0482357	-0.0601227	-0.019425	-0.0459447	-0.0163338	-0.0122954	-0.0511297	-0.00554492	0.0095866	-0.0349459	0.0121643	-0.0178755	-0.0308066	-0.0122688	-0.0398774	-0.0443574	-0.0140901	-0.0437449	-0.0227204	-0.021768	-0.0469333	-0.0302116	-0.00770929	-0.0474814	-0.0120481	-0.0303988	-0.0367179	-0.00485984	-0.0549407	-0.0269644	-0.0216575	-0.0469249	-0.0827331
989.979	35.7354	0.0632962	-0.0264486	-0.0265833	0.0442342	-0.0871151	-0.0426924	0.0743405	-0.00456512	0.0456106	0.0654067	0.0116539	0.12563	-0.035578	0.105938	0.00159932	-0.0491141	-0.0587759	-0.0200993	-0.0476861	-0.0152992	-0.0136783	-0.0517336	-0.00388194	0.00857867	-0.0346972	0.0124015	-0.0192999	-0.030495	-0.011518	-0.0404154	-0.0436829	-0.0141415	-0.0450613	-0.0209404	-0.0227463	-0.0468823	-0.0296055	-0.00795464	-0.0479582	-0.0117627	-0.031555	-0.0361653	-0.00450826	-0.0509003	-0.0267027	-0.0214168	-0.0486111	-0.0815956
993.211	35.7895	0.0637235	-0.0279705	-0.024073	0.0432641	-0.0873277	-0.0389614	0.0724904	-0.0045207	0.046455	0.06273	0.0117165	0.125684	-0.0365018	0.108149	0.00149803	-0.049829	-0.0573131	-0.0208127	-0.0494568	-0.0143188	-0.0151973	-0.052386	-0.00237266	0.00755772	-0.0344268	0.0126046	-0.0206666	-0.0300187	-0.0107187	-0.0408824	-0.0430201	-0.014207	-0.0462408	-0.0192692	-0.0236697	-0.0468842	-0.0290244	-0.00837839	-0.0483715	-0.011626	-0.0326235	-0.0356554	-0.00415352	-0.0468543	-0.0265112	-0.0213072	-0.050215	-0.0803997
996.38	35.8435	0.0640866	-0.0292122	-0.02139	0.0421617	-0.0875181	-0.0352368	0.0705222	-0.00452153	0.0470421	0.0598937	0.0117849	0.125453	-0.0373759	0.110429	0.00139401	-0.0503565	-0.0557389	-0.0215573	-0.0512505	-0.0133984	-0.0168393	-0.0530648	-0.00103072	0.00650838	-0.0341268	0.0127704	-0.0219547	-0.0293774	-0.00987189	-0.0412783	-0.0423783	-0.0143089	-0.0472638	-0.0177191	-0.0245412	-0.0469457	-0.0284572	-0.00898393	-0.0487171	-0.0116503	-0.0335969	-0.0351951	-0.00381202	-0.0427924	-0.026397	-0.0213303	-0.0517352	-0.0791414
999.589	35.8976	0.064351	-0.0301798	-0.0185609	0.0409255	-0.0876756	-0.0315451	0.0684586	-0.004548	0.0473725	0.0569204	0.0118708	0.124944	-0.0381922	0.112779	0.00128725	-0.0506737	-0.0540579	-0.0223277	-0.0530566	-0.0125432	-0.018584	-0.0537453	0.000136086	0.00540887	-0.0337877	0.0128959	-0.0231469	-0.0285737	-0.00898358	-0.0416001	-0.0417613	-0.0144675	-0.048117	-0.0162965	-0.0253651	-0.0470708	-0.0278919	-0.00976808	-0.0489915	-0.0118421	-0.0344735	-0.0347818	-0.00350132	-0.038706	-0.0263646	-0.0214836	-0.0531748	-0.0778158
1002.8	35.9517	0.0644737	-0.0308813	-0.0156143	0.0395515	-0.0877843	-0.0279073	0.0663227	-0.00457792	0.0474537	0.0538345	0.0119863	0.124167	-0.0389469	0.1152	0.00117774	-0.0507611	-0.0522751	-0.0231214	-0.0548583	-0.011756	-0.0204045	-0.0544016	0.00112526	0.00423388	-0.0333991	0.012978	-0.0242319	-0.0276133	-0.00806315	-0.0418411	-0.0411677	-0.014701	-0.0487955	-0.0150013	-0.0261464	-0.0472586	-0.0273184	-0.0107207	-0.0491933	-0.0122014	-0.0352571	-0.0344036	-0.00323999	-0.0345901	-0.0264142	-0.021761	-0.0545392	-0.0764178
1006.06	36.0058	0.0644059	-0.0313273	-0.0125802	0.0380347	-0.0878241	-0.0243397	0.0641358	-0.00458846	0.0472997	0.0506604	0.0121426	0.12314	-0.039639	0.117697	0.00106548	-0.0506043	-0.0503967	-0.0239382	-0.0566324	-0.0110382	-0.0222703	-0.0550088	0.00193979	0.00295752	-0.032949	0.013013	-0.0252049	-0.0265046	-0.00712162	-0.0419924	-0.0405927	-0.0150263	-0.0493029	-0.0138274	-0.0268904	-0.0475018	-0.0267284	-0.0118255	-0.0493232	-0.0127215	-0.0359556	-0.0340394	-0.00304759	-0.0304457	-0.0265412	-0.022153	-0.0558334	-0.0749427
1009.35	36.0598	0.0640965	-0.0315302	-0.00948812	0.0363693	-0.0877717	-0.0208548	0.0619169	-0.00455778	0.0469304	0.0474227	0.0123489	0.121884	-0.0402695	0.120271	0.000950473	-0.0501955	-0.0484292	-0.0247797	-0.0583505	-0.0103907	-0.0241498	-0.055544	0.00258778	0.00155645	-0.0324255	0.0129979	-0.0260681	-0.0252593	-0.0061706	-0.0420426	-0.0400299	-0.0154584	-0.0496507	-0.0127622	-0.027603	-0.0477869	-0.0261162	-0.0130604	-0.0493847	-0.013389	-0.0365796	-0.0336614	-0.0029433	-0.026282	-0.0267362	-0.0226473	-0.0570595	-0.0733859
1012.66	36.1139	0.0634969	-0.0315033	-0.00636529	0.0345501	-0.0876031	-0.0174614	0.0596831	-0.00446634	0.0463699	0.0441457	0.0126116	0.120424	-0.0408411	0.122923	0.000832732	-0.049534	-0.0463791	-0.0256492	-0.0599817	-0.00981576	-0.0260134	-0.0559865	0.00308178	1.1667e-05	-0.031818	0.0129298	-0.0268297	-0.0238902	-0.00522158	-0.0419797	-0.0394714	-0.0160097	-0.0498576	-0.0117893	-0.0282914	-0.0480957	-0.0254797	-0.0143991	-0.0493833	-0.0141864	-0.0371415	-0.0332383	-0.00294437	-0.022117	-0.0269852	-0.0232296	-0.0582156	-0.0717437
1015.88	36.168	0.0625638	-0.0312605	-0.00323601	0.0325746	-0.0872936	-0.0141653	0.0574495	-0.00429826	0.0456447	0.0408529	0.0129338	0.118784	-0.0413586	0.125653	0.000712249	-0.0486268	-0.0442518	-0.0265508	-0.0614947	-0.00931611	-0.0278347	-0.0563174	0.00343823	-0.00168932	-0.0311199	0.0128072	-0.0275025	-0.0224094	-0.0042863	-0.0417926	-0.0389089	-0.0166885	-0.0499472	-0.0108903	-0.0289641	-0.0484079	-0.0248202	-0.0158117	-0.0493255	-0.0150934	-0.0376537	-0.0327401	-0.00306416	-0.0179773	-0.0272698	-0.0238856	-0.0592944	-0.0700131
1019.12	36.2221	0.0612621	-0.030817	-0.000121764	0.0304432	-0.08682	-0.0109687	0.0552306	-0.00404122	0.0447825	0.0375664	0.0133152	0.116988	-0.0418287	0.128457	0.000589007	-0.0474878	-0.042052	-0.027489	-0.0628604	-0.00889557	-0.0295927	-0.0565184	0.00367629	-0.00355181	-0.0303287	0.0126289	-0.0281026	-0.0208281	-0.00337771	-0.0414727	-0.0383335	-0.0174993	-0.0499463	-0.0100484	-0.0296304	-0.0487021	-0.0241401	-0.0172664	-0.0492191	-0.0160889	-0.0381289	-0.0321417	-0.00331083	-0.0138982	-0.027569	-0.0246014	-0.0602834	-0.0681927
1022.33	36.2761	0.0595635	-0.0301909	0.002959	0.0281597	-0.0861603	-0.00787145	0.0530408	-0.00368637	0.0438117	0.0343067	0.0137531	0.115062	-0.0422603	0.131328	0.000462977	-0.046137	-0.0397838	-0.0284673	-0.064054	-0.00855934	-0.03127	-0.0565722	0.00381655	-0.00557362	-0.0294482	0.0123939	-0.0286488	-0.0191549	-0.00251018	-0.0410137	-0.0377362	-0.0184409	-0.049883	-0.0092506	-0.0302995	-0.0489583	-0.0234414	-0.0187313	-0.0490727	-0.0171536	-0.0385794	-0.0314266	-0.00368634	-0.00991984	-0.0278603	-0.0253647	-0.0611666	-0.0662826
1025.57	36.3302	0.0574482	-0.0294032	0.00599052	0.0257321	-0.0852953	-0.00487219	0.0508948	-0.00322785	0.042761	0.0310928	0.0142424	0.113024	-0.0426654	0.134256	0.000334129	-0.0445989	-0.0374511	-0.029487	-0.0650556	-0.00831359	-0.0328543	-0.0564629	0.00387861	-0.00774526	-0.0284873	0.0121015	-0.0291596	-0.0173971	-0.00169895	-0.040413	-0.0371063	-0.0195073	-0.0497848	-0.0084888	-0.0309805	-0.0491575	-0.0227256	-0.0201768	-0.0488944	-0.0182707	-0.0390174	-0.0305866	-0.00418639	-0.0060864	-0.0281221	-0.0261646	-0.0619251	-0.0642844
1028.8	36.3843	0.0549038	-0.0284783	0.00895985	0.0231732	-0.0842096	-0.00196845	0.0488083	-0.00266218	0.0416589	0.0279427	0.0147761	0.110893	-0.0430594	0.137226	0.000202431	-0.0429014	-0.0350579	-0.030546	-0.06585	-0.00816335	-0.0343379	-0.0561774	0.00387945	-0.0100505	-0.0274599	0.0117513	-0.0296523	-0.0155609	-0.000958944	-0.0396719	-0.0364318	-0.0206873	-0.0496764	-0.00775977	-0.0316807	-0.0492827	-0.0219941	-0.0215768	-0.0486917	-0.0194278	-0.0394532	-0.029622	-0.00480124	-0.00244439	-0.0283349	-0.0269917	-0.0625386	-0.0622007
1032.08	36.4384	0.0519262	-0.0274434	0.011855	0.020499	-0.0828937	0.000841903	0.0467988	-0.00198798	0.0405336	0.0248728	0.0153468	0.108686	-0.04346	0.140217	6.78583e-05	-0.0410741	-0.0326096	-0.031638	-0.0664277	-0.00811038	-0.0357181	-0.0557069	0.00383176	-0.0124673	-0.0263836	0.0113427	-0.0301409	-0.0136534	-0.000303212	-0.038796	-0.0356993	-0.0219665	-0.0495787	-0.00706499	-0.0324054	-0.0493184	-0.0212477	-0.0229099	-0.0484719	-0.0206171	-0.039894	-0.028541	-0.00551613	0.000961044	-0.028482	-0.0278367	-0.062988	-0.0600353
1035.32	36.4924	0.0485193	-0.0263261	0.0146636	0.0177271	-0.0813452	0.00355994	0.0448858	-0.00120591	0.0394129	0.0218986	0.0159473	0.106415	-0.043886	0.143205	-6.96019e-05	-0.039148	-0.0301134	-0.0327526	-0.0667828	-0.00815252	-0.0369961	-0.0550482	0.00374415	-0.0149688	-0.0252788	0.0108742	-0.0306363	-0.0116851	0.000257187	-0.0377943	-0.034895	-0.023328	-0.0495074	-0.00641014	-0.0331568	-0.0492514	-0.0204862	-0.0241605	-0.048241	-0.0218355	-0.0403424	-0.0273581	-0.00631262	0.00408883	-0.0285501	-0.0286897	-0.0632571	-0.0577937
1038.53	36.5465	0.0446959	-0.0251529	0.0173724	0.0148758	-0.0795688	0.00618447	0.0430905	-0.000318081	0.0383235	0.0190337	0.0165712	0.10409	-0.0443564	0.146166	-0.000209943	-0.0371538	-0.0275788	-0.0338755	-0.0669126	-0.00828419	-0.0381762	-0.0542037	0.00362144	-0.0175241	-0.024167	0.0103426	-0.0311462	-0.00966982	0.000713563	-0.0366779	-0.0340057	-0.0247529	-0.0494735	-0.00580445	-0.0339341	-0.0490721	-0.0197085	-0.0253196	-0.048004	-0.0230843	-0.0407975	-0.0260943	-0.00717028	0.0069051	-0.0285292	-0.0295387	-0.0633325	-0.0554823
1041.82	36.6006	0.0404771	-0.0239472	0.0199677	0.0119636	-0.0775739	0.00871204	0.0414345	0.00067198	0.0372893	0.0162894	0.0172129	0.10172	-0.0448887	0.149071	-0.000353138	-0.0351219	-0.025018	-0.0349896	-0.0668164	-0.00849715	-0.0392649	-0.0531802	0.00346522	-0.0200991	-0.0230704	0.00974161	-0.0316748	-0.00762622	0.00106052	-0.0354588	-0.0330195	-0.0262222	-0.0494815	-0.00525933	-0.0347338	-0.048776	-0.0189134	-0.0263845	-0.047763	-0.0243675	-0.0412547	-0.0247763	-0.00806929	0.0093844	-0.0284124	-0.0303703	-0.0632048	-0.053109
1045.13	36.6547	0.0358915	-0.0227288	0.0224349	0.00900854	-0.075374	0.0111369	0.0399383	0.00175978	0.036328	0.0136736	0.0178681	0.0993103	-0.0454984	0.151889	-0.000499133	-0.0330817	-0.022445	-0.0360749	-0.0664952	-0.00878108	-0.0402702	-0.0519873	0.00327346	-0.0226571	-0.0220107	0.00906254	-0.0322222	-0.0055769	0.00129575	-0.0341507	-0.0319282	-0.0277176	-0.0495302	-0.00478613	-0.0355493	-0.0483645	-0.0180993	-0.0273575	-0.0475175	-0.0256899	-0.0417076	-0.0234344	-0.00899194	0.0115096	-0.0281978	-0.0311694	-0.0628686	-0.0506827
1048.31	36.7087	0.0309744	-0.0215149	0.0247576	0.00602728	-0.0729857	0.0134533	0.0386211	0.00294117	0.0354497	0.011191	0.0185338	0.0968659	-0.0461981	0.154589	-0.000647848	-0.0310616	-0.019876	-0.0371095	-0.0659512	-0.00912511	-0.0412009	-0.050638	0.00304154	-0.0251616	-0.0210078	0.00829416	-0.0327837	-0.0035476	0.00141881	-0.0327696	-0.0307273	-0.0292215	-0.0496115	-0.00439445	-0.0363714	-0.0478452	-0.0172647	-0.0282455	-0.0472638	-0.0270549	-0.0421486	-0.0221008	-0.00992418	0.0132715	-0.0278892	-0.03192	-0.0623239	-0.0482144
1051.53	36.7628	0.0257663	-0.0203191	0.026917	0.00303435	-0.0704291	0.0156557	0.0375007	0.00421359	0.0346561	0.00884286	0.0192093	0.0943908	-0.0469978	0.157136	-0.000799175	-0.0290866	-0.0173277	-0.0380697	-0.0651884	-0.00951862	-0.0420641	-0.0491478	0.00276338	-0.0275775	-0.0200789	0.00742338	-0.0333498	-0.00156628	0.0014294	-0.031333	-0.0294158	-0.0307168	-0.0497115	-0.00409138	-0.0371895	-0.0472312	-0.0164088	-0.0290588	-0.0469955	-0.0284652	-0.0425687	-0.0208079	-0.0108559	0.014669	-0.027496	-0.032607	-0.061576	-0.045717
1054.8	36.8169	0.0203121	-0.0191519	0.0288932	4.19469e-05	-0.0677272	0.0177393	0.0365934	0.0055766	0.0339415	0.00662703	0.0198958	0.0918895	-0.0479047	0.159501	-0.000952975	-0.027176	-0.0148168	-0.0389321	-0.0642124	-0.0099516	-0.042864	-0.0475344	0.00243177	-0.0298724	-0.0192365	0.00643622	-0.0339069	0.000338464	0.0013262	-0.029858	-0.0279955	-0.0321862	-0.0498123	-0.00388222	-0.0379918	-0.04654	-0.0155319	-0.0298097	-0.0467038	-0.0299224	-0.0429585	-0.0195865	-0.0117803	0.0157087	-0.0270326	-0.033217	-0.0606362	-0.0432043
1058.08	36.8709	0.014659	-0.0180195	0.030666	-0.00293986	-0.0649045	0.0197013	0.0359132	0.0070317	0.0332922	0.00453802	0.020596	0.0893671	-0.0489236	0.161656	-0.00110908	-0.0253431	-0.0123595	-0.0396756	-0.0630303	-0.0104143	-0.0436014	-0.0458169	0.0020382	-0.0320174	-0.0184886	0.00531899	-0.0344405	0.00213937	0.00110671	-0.0283597	-0.0264711	-0.0336128	-0.0498934	-0.00377099	-0.0387664	-0.0457914	-0.0146355	-0.03051	-0.0463791	-0.0314279	-0.0433087	-0.0184634	-0.0126943	0.0164045	-0.0265166	-0.0337398	-0.0595201	-0.0406909
1061.26	36.925	0.00885588	-0.0169253	0.0322168	-0.00590383	-0.0619862	0.0215387	0.0354703	0.00858187	0.0326878	0.00256791	0.0213139	0.0868295	-0.0500568	0.163577	-0.00126732	-0.0235943	-0.00997182	-0.0402835	-0.0616505	-0.0108965	-0.0442739	-0.0440161	0.001573	-0.0339875	-0.0178375	0.00405912	-0.0349363	0.00381203	0.000766807	-0.0268501	-0.0248502	-0.0349802	-0.0499334	-0.00376013	-0.0395016	-0.0450066	-0.0137227	-0.0311701	-0.046012	-0.0329812	-0.0436102	-0.0174601	-0.0135988	0.0167752	-0.0259674	-0.0341681	-0.0582458	-0.0381921
1064.47	36.9791	0.00295135	-0.0158678	0.033529	-0.00884559	-0.0589992	0.023248	0.0352694	0.0102312	0.0321028	0.000707157	0.022054	0.0842829	-0.0513051	0.165245	-0.00142749	-0.0219303	-0.00766806	-0.0407433	-0.0600823	-0.011389	-0.0448776	-0.0421542	0.00102602	-0.0357621	-0.0172812	0.0026455	-0.0353805	0.00533539	0.00030216	-0.0253382	-0.0231432	-0.0362728	-0.049911	-0.00385	-0.0401875	-0.0442053	-0.0127978	-0.0317987	-0.0455945	-0.0345785	-0.0438543	-0.016592	-0.0144983	0.016842	-0.0254052	-0.034497	-0.0568336	-0.0357229
1067.74	37.0332	-0.0030071	-0.0148404	0.0345894	-0.0117628	-0.0559707	0.0248239	0.0353084	0.0119832	0.0315085	-0.00105516	0.022821	0.0817338	-0.0526665	0.166647	-0.00158939	-0.0203471	-0.0054615	-0.0410484	-0.0583354	-0.0118837	-0.0454077	-0.0402539	0.000387958	-0.0373254	-0.0168133	0.00106907	-0.0357617	0.00669254	-0.000290494	-0.0238313	-0.0213638	-0.037477	-0.049806	-0.00403738	-0.0408171	-0.0434046	-0.0118683	-0.0324029	-0.0451204	-0.0362124	-0.0440329	-0.0158678	-0.0154007	0.0166248	-0.0248498	-0.0347232	-0.0553043	-0.0332984
1070.98	37.0872	-0.00897338	-0.0138311	0.0353887	-0.0146544	-0.0529286	0.0262588	0.0355789	0.0138394	0.0308756	-0.00273144	0.0236191	0.0791874	-0.054136	0.167773	-0.00175281	-0.0188369	-0.00336359	-0.0411967	-0.0564204	-0.0123733	-0.0458596	-0.038338	-0.000349242	-0.0386672	-0.0164249	-0.000676589	-0.0360716	0.00787184	-0.00101304	-0.0223345	-0.0195284	-0.0385811	-0.0496006	-0.00431593	-0.0413859	-0.0426174	-0.0109447	-0.0329884	-0.0445845	-0.0378716	-0.0441385	-0.0152891	-0.0163157	0.0161389	-0.0243197	-0.0348453	-0.0536789	-0.0309327
1074.25	37.1413	-0.0149038	-0.0128231	0.0359224	-0.0175215	-0.0498991	0.0275424	0.0360654	0.0157978	0.0301761	-0.00433523	0.0244514	0.0766491	-0.0557038	0.16862	-0.00191755	-0.0173905	-0.00138366	-0.0411916	-0.0543481	-0.0128515	-0.0462293	-0.0364292	-0.00119183	-0.0397825	-0.0161043	-0.00259328	-0.0363073	0.00886705	-0.0018649	-0.020852	-0.0176566	-0.0395761	-0.0492797	-0.00467687	-0.0418924	-0.0418524	-0.0100401	-0.0335588	-0.0439825	-0.0395417	-0.0441649	-0.0148507	-0.0172546	0.0153925	-0.0238308	-0.0348646	-0.0519775	-0.0286391
1077.52	37.1954	-0.0207573	-0.0117976	0.0361911	-0.020367	-0.0469073	0.0286608	0.0367461	0.017853	0.0293846	-0.00588066	0.0253198	0.0741241	-0.0573554	0.16919	-0.0020834	-0.0159982	0.000471704	-0.0410406	-0.0521302	-0.0133123	-0.0465144	-0.0345486	-0.00214398	-0.0406704	-0.0158378	-0.00467728	-0.0364715	0.00967746	-0.00284321	-0.0193873	-0.0157697	-0.0404563	-0.0488315	-0.00511033	-0.0423376	-0.041114	-0.00916808	-0.0341152	-0.0433117	-0.0412049	-0.0441076	-0.0145423	-0.018228	0.0143866	-0.0233961	-0.0347858	-0.0502194	-0.0264297
1080.75	37.2495	-0.0264951	-0.0107357	0.0362017	-0.0231952	-0.0439749	0.029595	0.0375934	0.0199948	0.0284786	-0.00738197	0.0262239	0.0716185	-0.0590705	0.169494	-0.00225015	-0.0146515	0.00219835	-0.0407545	-0.0497798	-0.0137514	-0.0467154	-0.0327145	-0.00320733	-0.0413337	-0.0156112	-0.00692013	-0.0365721	0.0103069	-0.00394155	-0.0179436	-0.0138893	-0.0412191	-0.0482478	-0.00560635	-0.0427263	-0.0404023	-0.00834276	-0.0346566	-0.0425708	-0.0428398	-0.0439645	-0.0143496	-0.0192448	0.0131175	-0.0230249	-0.0346188	-0.048423	-0.0243158
1083.96	37.3035	-0.0320793	-0.00961819	0.0359677	-0.0260101	-0.0411194	0.0303202	0.0385753	0.022209	0.027439	-0.00885294	0.0271605	0.0691386	-0.0608254	0.169546	-0.00241759	-0.0133424	0.00379428	-0.040347	-0.0473128	-0.0141664	-0.0468367	-0.0309414	-0.00438102	-0.0417783	-0.015411	-0.00930879	-0.0366206	0.0107633	-0.00514845	-0.016524	-0.0120364	-0.0418654	-0.0475239	-0.00615556	-0.0430664	-0.0397138	-0.00757843	-0.0351794	-0.0417599	-0.0444229	-0.043736	-0.0142565	-0.0203103	0.0115792	-0.0227228	-0.0343778	-0.0466056	-0.0223075
1087.23	37.3576	-0.0374716	-0.0084274	0.0355096	-0.0288122	-0.038354	0.0308073	0.0396567	0.0244771	0.0262494	-0.0103061	0.0281226	0.0666899	-0.0625937	0.169367	-0.0025855	-0.0120645	0.00525917	-0.0398335	-0.0447479	-0.0145576	-0.0468871	-0.0292391	-0.00566124	-0.042013	-0.0152257	-0.0118265	-0.0366298	0.0110576	-0.00644761	-0.0151326	-0.0102303	-0.0423996	-0.0466584	-0.00674928	-0.0433688	-0.0390414	-0.00688978	-0.0356782	-0.0408802	-0.0459294	-0.0434239	-0.0142465	-0.021426	0.00976409	-0.0224935	-0.0340818	-0.0447839	-0.0204144
1090.45	37.4117	-0.0426334	-0.00714601	0.0348537	-0.0315983	-0.0356871	0.0310235	0.0408012	0.0267763	0.0248971	-0.011752	0.0290995	0.0642777	-0.0643487	0.168981	-0.0027537	-0.0108116	0.00659399	-0.0392293	-0.0421075	-0.0149277	-0.0468811	-0.0276123	-0.00704219	-0.0420497	-0.0150469	-0.0144525	-0.0366107	0.011204	-0.00781873	-0.0137745	-0.00848883	-0.0428285	-0.0456528	-0.00738041	-0.0436451	-0.0383767	-0.00629102	-0.036147	-0.0399334	-0.0473353	-0.0430306	-0.0143047	-0.0225878	0.00766397	-0.0223388	-0.0337522	-0.0429738	-0.0186448
1093.76	37.4658	-0.0475263	-0.00575897	0.0340318	-0.0343611	-0.0331229	0.0309346	0.0419734	0.0290813	0.023374	-0.0131988	0.0300777	0.0619074	-0.0660635	0.168417	-0.00292197	-0.00957802	0.00780001	-0.0385489	-0.0394183	-0.0152829	-0.0468371	-0.0260617	-0.00851592	-0.0419032	-0.0148702	-0.0171621	-0.036571	0.0112181	-0.00923946	-0.0124559	-0.00682757	-0.0431599	-0.0445116	-0.00804424	-0.0439076	-0.0377114	-0.00579461	-0.0365801	-0.0389219	-0.0486191	-0.0425576	-0.0144193	-0.0237871	0.00526993	-0.0222598	-0.0334126	-0.0411902	-0.0170059
1097.05	37.5198	-0.052114	-0.00425378	0.0330792	-0.0370893	-0.0306618	0.0305073	0.0431421	0.0313653	0.0216782	-0.0146521	0.0310404	0.0595843	-0.067713	0.167709	-0.00309008	-0.00835772	0.00887851	-0.0378054	-0.0367103	-0.0156333	-0.0467764	-0.0245843	-0.0100725	-0.0415903	-0.014696	-0.019927	-0.036514	0.0111161	-0.0106867	-0.0111822	-0.00526009	-0.0434008	-0.0432433	-0.00873954	-0.0441685	-0.0370385	-0.00541047	-0.0369725	-0.0378483	-0.0497637	-0.0420069	-0.014582	-0.025011	0.00257422	-0.0222563	-0.0330863	-0.0394471	-0.0155022
1100.25	37.5739	-0.0563623	-0.00262073	0.032034	-0.0397686	-0.0283011	0.0297124	0.0442811	0.0336021	0.0198146	-0.0161153	0.0319697	0.0573148	-0.0692744	0.166891	-0.00325781	-0.00714493	0.00982995	-0.0370111	-0.0340163	-0.0159918	-0.0467208	-0.0231746	-0.0117003	-0.0411294	-0.0145285	-0.0227156	-0.036437	0.0109152	-0.0121379	-0.00995825	-0.00379785	-0.0435557	-0.0418608	-0.00946825	-0.0444392	-0.0363543	-0.00514582	-0.0373209	-0.0367153	-0.0507581	-0.0413804	-0.0147878	-0.0262427	-0.000429384	-0.0223276	-0.0327959	-0.0377569	-0.0141353
1103.41	37.628	-0.0602409	-0.000852745	0.0309351	-0.0423831	-0.0260366	0.0285263	0.0453713	0.0357666	0.0177942	-0.0175895	0.0328473	0.0551063	-0.0707284	0.166	-0.00342493	-0.00593453	0.0106538	-0.0361763	-0.0313701	-0.0163721	-0.0466909	-0.0218261	-0.0133869	-0.0405404	-0.0143756	-0.0254937	-0.0363314	0.0106321	-0.0135712	-0.00878797	-0.00245002	-0.0436272	-0.0403809	-0.0102339	-0.0447298	-0.0356582	-0.00500554	-0.0376231	-0.0355269	-0.0515983	-0.0406806	-0.0150336	-0.0274621	-0.0037442	-0.0224722	-0.0325615	-0.0361296	-0.0129049
1106.7	37.682	-0.0637244	0.00105437	0.0298177	-0.0449166	-0.0238642	0.026934	0.0464001	0.0378356	0.015634	-0.0190734	0.0336565	0.0529674	-0.0720603	0.165068	-0.0035912	-0.00472241	0.0113477	-0.0353097	-0.0288049	-0.0167876	-0.0467039	-0.0205338	-0.0151197	-0.0398449	-0.0142462	-0.0282252	-0.0361839	0.0102822	-0.0149658	-0.00767465	-0.00122289	-0.0436162	-0.0388246	-0.0110404	-0.0450474	-0.0349535	-0.00499267	-0.0378799	-0.0342889	-0.0522885	-0.0399098	-0.0153176	-0.0286472	-0.0073704	-0.0226887	-0.0324002	-0.0345729	-0.0118083
1109.95	37.7361	-0.0667937	0.00310138	0.028711	-0.0473538	-0.0217803	0.0249294	0.0473612	0.0397878	0.013355	-0.0205633	0.0343829	0.0509073	-0.0732605	0.164125	-0.00375641	-0.00350535	0.0119072	-0.0344172	-0.0263513	-0.0172491	-0.0467717	-0.0192954	-0.0168862	-0.0390647	-0.0141505	-0.0308748	-0.0359791	0.00987897	-0.0163019	-0.00661986	-0.000119193	-0.0435223	-0.0372158	-0.0118915	-0.0453942	-0.0342462	-0.00510835	-0.038095	-0.0330086	-0.0528416	-0.0390698	-0.0156384	-0.0297763	-0.0113029	-0.0229757	-0.0323255	-0.0330933	-0.0108416
1113.24	37.7902	-0.0694377	0.00528529	0.0276355	-0.0496821	-0.0197818	0.0225153	0.0482545	0.0416032	0.0109812	-0.0220523	0.0350146	0.0489353	-0.0743235	0.163198	-0.00392034	-0.00228045	0.012325	-0.033502	-0.0240346	-0.0177647	-0.0468994	-0.0181121	-0.0186739	-0.0382205	-0.0140979	-0.03341	-0.0357022	0.00943287	-0.0175604	-0.00562278	0.000861536	-0.0433448	-0.0355808	-0.0127911	-0.0457663	-0.0335448	-0.00535174	-0.0382749	-0.0316947	-0.0532784	-0.0381625	-0.015995	-0.0308304	-0.0155305	-0.0233315	-0.0323469	-0.031696	-0.00999934
1116.52	37.8443	-0.0716539	0.00759947	0.0266028	-0.0518905	-0.0178652	0.0197046	0.049085	0.0432625	0.008537	-0.0235303	0.035542	0.0470605	-0.0752469	0.16231	-0.00408274	-0.00104572	0.0125904	-0.0325659	-0.021874	-0.0183384	-0.0470852	-0.0169877	-0.0204705	-0.0373308	-0.0140975	-0.0358021	-0.035341	0.00894968	-0.0187242	-0.00468086	0.0017221	-0.0430854	-0.033946	-0.0137426	-0.0461541	-0.0328584	-0.00572103	-0.0384275	-0.0303558	-0.0536252	-0.0371912	-0.0163859	-0.0317953	-0.0200338	-0.023753	-0.0324696	-0.0303845	-0.0092761
1119.78	37.8983	-0.0734483	0.010034	0.0256154	-0.0539688	-0.0160268	0.0165183	0.0498631	0.0447464	0.00604625	-0.0249837	0.0359572	0.045291	-0.0760314	0.16148	-0.00424338	0.000199936	0.0126899	-0.0316107	-0.0198818	-0.018971	-0.0473208	-0.0159285	-0.0222636	-0.0364112	-0.0141565	-0.0380282	-0.0348851	0.00843113	-0.0197798	-0.00379161	0.00246587	-0.0427481	-0.0323368	-0.0147485	-0.0465419	-0.0321962	-0.00621419	-0.0385598	-0.029	-0.0539102	-0.0361599	-0.0168098	-0.0326628	-0.0247846	-0.0242356	-0.032694	-0.0291607	-0.00866619
1123.03	37.9524	-0.0748338	0.0125768	0.0246691	-0.0559058	-0.0142626	0.0129859	0.0506033	0.0460383	0.0035308	-0.0263956	0.0362548	0.0436337	-0.0766809	0.160722	-0.00440202	0.00145759	0.0126097	-0.0306386	-0.018065	-0.0196625	-0.0475932	-0.0149417	-0.0240394	-0.0354734	-0.0142806	-0.0400719	-0.0343248	0.00787546	-0.0207172	-0.00295399	0.00309574	-0.0423396	-0.0307764	-0.0158108	-0.0469105	-0.0315677	-0.00682908	-0.0386776	-0.0276339	-0.0541598	-0.0350736	-0.0172658	-0.0334294	-0.0297429	-0.0247736	-0.0330143	-0.0280257	-0.00816447
1126.22	38.0065	-0.0758299	0.0152147	0.0237525	-0.0576903	-0.012569	0.00914515	0.051324	0.047127	0.00101077	-0.0277475	0.0364328	0.0420936	-0.0772028	0.160042	-0.00455841	0.00272938	0.0123372	-0.0296538	-0.016426	-0.020414	-0.0478848	-0.014035	-0.0257825	-0.0345255	-0.0144734	-0.0419234	-0.0336518	0.00727844	-0.0215327	-0.00216876	0.00361348	-0.0418685	-0.0292868	-0.0169304	-0.0472385	-0.0309831	-0.00756352	-0.0387853	-0.0262636	-0.0543973	-0.0339381	-0.0177548	-0.0340961	-0.0348585	-0.0253605	-0.0334186	-0.0269793	-0.0077661
1129.36	38.0606	-0.0764629	0.0179331	0.0228497	-0.0593112	-0.0109437	0.00504045	0.0520461	0.0480087	-0.00149572	-0.0290202	0.0364935	0.0406745	-0.0776069	0.159442	-0.00471233	0.00401879	0.0118621	-0.0286621	-0.014963	-0.0212282	-0.0481746	-0.0132169	-0.0274764	-0.0335727	-0.0147358	-0.0435791	-0.0328581	0.0066361	-0.022228	-0.00143674	0.00401841	-0.041345	-0.0278882	-0.0181079	-0.0475032	-0.0304527	-0.00841516	-0.0388855	-0.0248945	-0.0546426	-0.0327605	-0.0182777	-0.0346668	-0.0400715	-0.0259901	-0.0338886	-0.0260193	-0.00746639
1132.63	38.1146	-0.0767667	0.0207142	0.0219412	-0.06076	-0.00938682	0.000721837	0.0527928	0.0486874	-0.00397188	-0.0301944	0.036444	0.0393797	-0.0779045	0.15892	-0.00486355	0.00532995	0.0111781	-0.0276712	-0.0136696	-0.0221093	-0.0484369	-0.0124967	-0.0291054	-0.0326177	-0.0150656	-0.04504	-0.0319381	0.00594618	-0.0228113	-0.000757625	0.00430754	-0.0407801	-0.0265997	-0.0193426	-0.047682	-0.0299871	-0.00938025	-0.0389794	-0.0235329	-0.0549131	-0.0315506	-0.0188351	-0.0351484	-0.045316	-0.0266571	-0.0344017	-0.025141	-0.00726058
1135.91	38.1687	-0.0767837	0.023537	0.0210041	-0.0620326	-0.00790172	-0.0037567	0.0535877	0.0491743	-0.00640137	-0.0312514	0.036297	0.0382128	-0.0781072	0.158466	-0.00501187	0.00666676	0.0102837	-0.026691	-0.0125345	-0.0230622	-0.048642	-0.0118835	-0.030656	-0.0316614	-0.0154571	-0.0463109	-0.0308904	0.00520864	-0.0232974	-0.000129679	0.00447541	-0.0401835	-0.0254376	-0.0206334	-0.0477542	-0.0295957	-0.0104524	-0.0390652	-0.0221863	-0.0552229	-0.0303207	-0.0194259	-0.0355502	-0.050523	-0.0273563	-0.0349339	-0.0243378	-0.00714409
1139.18	38.2228	-0.076564	0.0263775	0.0200129	-0.0631289	-0.00649493	-0.0083394	0.0544536	0.0494879	-0.00876692	-0.0321741	0.0360693	0.0371782	-0.0782269	0.158064	-0.00515712	0.008032	0.00918243	-0.0257326	-0.0115412	-0.0240906	-0.0487569	-0.011385	-0.0321172	-0.030704	-0.0159009	-0.0474002	-0.0297198	0.00442471	-0.0237062	0.000450433	0.00451631	-0.0395632	-0.0244147	-0.021978	-0.0477013	-0.029285	-0.0116222	-0.0391382	-0.0208637	-0.0555809	-0.0290858	-0.020046	-0.0358845	-0.055624	-0.0280811	-0.0354622	-0.0236016	-0.00711329
1142.41	38.2769	-0.0761629	0.0292088	0.0189414	-0.0640506	-0.00517573	-0.0129709	0.0554104	0.0496512	-0.0110505	-0.0329472	0.0357808	0.0362804	-0.0782748	0.157694	-0.00529913	0.00942578	0.00788251	-0.024809	-0.0106688	-0.0251959	-0.0487471	-0.0110055	-0.0334815	-0.0297438	-0.0163859	-0.0483193	-0.0284382	0.0035959	-0.0240611	0.000987253	0.00442493	-0.0389266	-0.0235399	-0.0233732	-0.0475082	-0.0290571	-0.0128764	-0.0391896	-0.0195744	-0.0559904	-0.027862	-0.020688	-0.0361654	-0.0605509	-0.0288233	-0.0359663	-0.0229251	-0.00716505
1145.67	38.3309	-0.0756367	0.0320043	0.0177634	-0.0648003	-0.0039542	-0.0175977	0.0564737	0.0496889	-0.0132345	-0.0335577	0.0354524	0.0355236	-0.0782605	0.157334	-0.00543777	0.010844	0.00639606	-0.0239347	-0.0098924	-0.0263758	-0.0485792	-0.0107442	-0.0347446	-0.0287772	-0.016899	-0.0490826	-0.0270642	0.00272342	-0.024386	0.00148481	0.00419647	-0.0382815	-0.0228175	-0.0248145	-0.0471622	-0.0289083	-0.014199	-0.0392066	-0.0183277	-0.0564486	-0.0266657	-0.0213412	-0.0364076	-0.0652391	-0.029572	-0.0364305	-0.0223015	-0.00729701
1148.86	38.385	-0.0750402	0.0347387	0.0164556	-0.0653793	-0.00284014	-0.02217	0.0576545	0.0496262	-0.0153028	-0.0339953	0.0351054	0.0349108	-0.0781925	0.15696	-0.00557292	0.0122774	0.00473946	-0.0231244	-0.00918464	-0.0276231	-0.0482241	-0.0105945	-0.0359061	-0.027798	-0.017427	-0.0497063	-0.0256231	0.0018082	-0.0247051	0.00194594	0.00382624	-0.0376369	-0.0222465	-0.0262964	-0.0466539	-0.0288291	-0.0155726	-0.0391746	-0.0171325	-0.0569465	-0.0255106	-0.0219928	-0.0366254	-0.069628	-0.030313	-0.0368435	-0.0217252	-0.00750784
1152.12	38.4391	-0.0744239	0.0373888	0.0149996	-0.0657865	-0.0018406	-0.0266429	0.0589605	0.0494869	-0.0172411	-0.0342523	0.0347597	0.0344426	-0.0780779	0.156547	-0.00570448	0.013711	0.00293251	-0.0223919	-0.00851875	-0.0289272	-0.0476608	-0.0105433	-0.0369677	-0.026798	-0.0179577	-0.0502076	-0.0241447	0.0008499	-0.0250413	0.00237083	0.00331018	-0.0370022	-0.0218211	-0.0278112	-0.0459779	-0.0288051	-0.0169798	-0.0390776	-0.0159974	-0.0574696	-0.0244069	-0.0226284	-0.0368307	-0.0736647	-0.0310295	-0.0371986	-0.0211911	-0.00779736
1155.38	38.4932	-0.0738314	0.0399334	0.0133838	-0.0660183	-0.000958499	-0.0309756	0.0603974	0.0492925	-0.0190365	-0.0343238	0.0344327	0.0341176	-0.0779242	0.15607	-0.00583239	0.0151244	0.000998059	-0.0217494	-0.00787125	-0.0302737	-0.0468777	-0.0105707	-0.037933	-0.0257679	-0.0184811	-0.0506038	-0.0226617	-0.000152692	-0.0254146	0.00275763	0.00264532	-0.0363852	-0.0215312	-0.0293502	-0.0451342	-0.0288187	-0.0184024	-0.0389004	-0.0149305	-0.0579998	-0.0233605	-0.0232344	-0.0370317	-0.077303	-0.0317029	-0.0374924	-0.0206944	-0.00816606
1158.64	38.5472	-0.0732981	0.0423521	0.0116035	-0.0660684	-0.000192087	-0.0351301	0.0619704	0.0490631	-0.0206772	-0.0342088	0.0341391	0.0339328	-0.0777394	0.155507	-0.00595659	0.0164944	-0.00103858	-0.0212061	-0.00722472	-0.0316462	-0.0458739	-0.0106514	-0.0388053	-0.0246984	-0.0189904	-0.0509118	-0.0212054	-0.00120065	-0.0258413	0.00310265	0.00183184	-0.035791	-0.0213634	-0.0309032	-0.0441303	-0.0288518	-0.0198221	-0.0386298	-0.0139397	-0.0585191	-0.0223733	-0.0238002	-0.0372312	-0.0805042	-0.032315	-0.0377248	-0.020231	-0.00861459
1161.86	38.6013	-0.0728479	0.0446251	0.00966124	-0.0659292	0.000463983	-0.039071	0.0636841	0.0488173	-0.0221529	-0.0339094	0.0338902	0.0338838	-0.0775335	0.154837	-0.00607702	0.0177965	-0.0031504	-0.0207669	-0.00656922	-0.0330254	-0.0446583	-0.0107575	-0.0395875	-0.0235823	-0.019482	-0.0511465	-0.019803	-0.00229428	-0.0263339	0.00340035	0.000873093	-0.0352206	-0.0213019	-0.0324586	-0.0429812	-0.0288873	-0.0212189	-0.0382563	-0.0130342	-0.0590134	-0.0214443	-0.0243197	-0.0374254	-0.0832354	-0.0328497	-0.0378977	-0.0197988	-0.00914315
1165.12	38.6554	-0.0724937	0.046732	0.00756413	-0.0655936	0.00101748	-0.0427658	0.0655422	0.0485729	-0.0234547	-0.033431	0.0336928	0.0339656	-0.07732	0.154042	-0.00619368	0.0190071	-0.00530973	-0.0204324	-0.00590179	-0.0343903	-0.0432475	-0.0108617	-0.0402821	-0.0224164	-0.019956	-0.0513211	-0.0184766	-0.00343279	-0.0269004	0.00364476	-0.000222921	-0.0346706	-0.021329	-0.0340035	-0.0417082	-0.0289109	-0.0225717	-0.0377752	-0.0122239	-0.0594749	-0.0205704	-0.0247927	-0.0376047	-0.0854713	-0.033295	-0.0380149	-0.0193967	-0.00975177
1168.34	38.7094	-0.0722371	0.0486507	0.00532194	-0.065057	0.00147677	-0.046186	0.0675475	0.0483466	-0.0245743	-0.0327812	0.0335493	0.0341733	-0.0771145	0.153107	-0.00630655	0.0201035	-0.00748946	-0.0201976	-0.00522427	-0.0357184	-0.0416637	-0.0109402	-0.0408914	-0.021202	-0.0204158	-0.0514471	-0.0172444	-0.00461407	-0.0275451	0.00383048	-0.00144326	-0.0341336	-0.0214277	-0.0355239	-0.0403358	-0.0289113	-0.0238576	-0.0371866	-0.0115196	-0.0599022	-0.0197467	-0.0252244	-0.0377561	-0.0871926	-0.0336432	-0.0380811	-0.0190262	-0.0104401
1171.6	38.7635	-0.07207	0.0503569	0.00294413	-0.0643179	0.00185011	-0.0493075	0.0697014	0.0481542	-0.0255047	-0.0319689	0.0334578	0.0345031	-0.0769343	0.152021	-0.00641565	0.0210636	-0.00966517	-0.0200521	-0.00454058	-0.0369862	-0.0399322	-0.0109746	-0.0414171	-0.019944	-0.0208677	-0.0515343	-0.0161221	-0.00583661	-0.0282681	0.00395265	-0.00277059	-0.0336007	-0.0215809	-0.0370052	-0.0388894	-0.0288803	-0.0250526	-0.0364945	-0.0109322	-0.0603001	-0.0189674	-0.0256226	-0.037865	-0.0883884	-0.0338906	-0.0381012	-0.0186919	-0.0112076
1174.8	38.8176	-0.071975	0.0518275	0.00043934	-0.0633767	0.00214376	-0.0521124	0.0720043	0.0480085	-0.0262412	-0.0310033	0.0334125	0.0349528	-0.0767976	0.150777	-0.006521	0.0218655	-0.0118163	-0.0199798	-0.00385519	-0.0381687	-0.0380784	-0.0109526	-0.0418608	-0.0186494	-0.0213202	-0.0515903	-0.0151232	-0.00710124	-0.0290659	0.00400661	-0.00418314	-0.0330631	-0.0217722	-0.0384317	-0.0373931	-0.0288127	-0.0261347	-0.0357058	-0.010472	-0.0606773	-0.0182263	-0.0259958	-0.0379167	-0.0890545	-0.0340374	-0.0380806	-0.0184008	-0.0120543
1178.08	38.8717	-0.0719265	0.0530425	-0.00218447	-0.0622345	0.00236182	-0.0545888	0.0744542	0.0479173	-0.0267839	-0.0298929	0.0334049	0.0355222	-0.0767235	0.14937	-0.00662266	0.0224883	-0.0139275	-0.0199601	-0.0031725	-0.0392414	-0.0361287	-0.0108674	-0.0422239	-0.0173263	-0.0217821	-0.051621	-0.0142577	-0.00841184	-0.0299305	0.00398579	-0.00565642	-0.0325141	-0.021985	-0.0397881	-0.0358679	-0.0287071	-0.027087	-0.0348297	-0.0101478	-0.0610443	-0.0175168	-0.0263511	-0.0378983	-0.089195	-0.034087	-0.038024	-0.018163	-0.0129799
1181.4	38.9257	-0.0718907	0.0539879	-0.00491863	-0.0608924	0.00250654	-0.0567313	0.0770479	0.0478826	-0.027138	-0.028646	0.0334247	0.0362127	-0.0767305	0.147801	-0.00672069	0.0229124	-0.0159885	-0.0199682	-0.00249697	-0.0401816	-0.0341093	-0.0107189	-0.0425067	-0.0159828	-0.0222624	-0.05163	-0.0135314	-0.00977515	-0.0308499	0.00388134	-0.00716512	-0.0319492	-0.0222025	-0.0410592	-0.0343317	-0.028566	-0.0278992	-0.0338774	-0.00996687	-0.0614114	-0.0168322	-0.026695	-0.0378002	-0.0888192	-0.0340452	-0.0379351	-0.0179913	-0.0139845
1184.72	38.9798	-0.071827	0.0546555	-0.00775377	-0.059351	0.00257884	-0.0585401	0.0797811	0.0479008	-0.027314	-0.0272713	0.0334599	0.0370268	-0.0768353	0.146075	-0.0068152	0.0231226	-0.0179944	-0.0199777	-0.00183373	-0.040972	-0.0320469	-0.0105146	-0.0427078	-0.0146265	-0.0227695	-0.0516203	-0.0129443	-0.0111998	-0.0318085	0.00368307	-0.00868513	-0.0313662	-0.0224094	-0.0422308	-0.0327999	-0.0283958	-0.0285696	-0.0328614	-0.00993523	-0.0617864	-0.016168	-0.0270346	-0.0376172	-0.0879419	-0.0339219	-0.0378145	-0.0178999	-0.0150685
1187.94	39.0339	-0.0716901	0.0550415	-0.010679	-0.0576121	0.00257851	-0.0600197	0.0826488	0.0479649	-0.0273282	-0.0257783	0.0334976	0.0379664	-0.0770508	0.1442	-0.0069063	0.0231087	-0.0199447	-0.019961	-0.00118873	-0.0416024	-0.029968	-0.0102702	-0.0428244	-0.0132644	-0.0233124	-0.0515944	-0.0124901	-0.0126949	-0.0327879	0.00338066	-0.0101959	-0.0307645	-0.0225926	-0.0432896	-0.031286	-0.0282075	-0.0291047	-0.0317948	-0.0100581	-0.0621747	-0.0155237	-0.027378	-0.0373486	-0.0865818	-0.0337315	-0.0376582	-0.0179031	-0.0162325
1191.18	39.088	-0.0714316	0.055145	-0.013683	-0.0556796	0.00250331	-0.0611786	0.0856439	0.048065	-0.0272012	-0.0241778	0.0335239	0.0390329	-0.0773845	0.142189	-0.00699416	0.0228663	-0.0218428	-0.0198918	-0.000568588	-0.0420707	-0.027898	-0.0100098	-0.0428527	-0.0119033	-0.0238998	-0.0515553	-0.012156	-0.0142681	-0.0337683	0.00296483	-0.0116824	-0.0301436	-0.0227426	-0.044223	-0.0298018	-0.028015	-0.0295182	-0.0306904	-0.0103397	-0.0625785	-0.0149038	-0.0277355	-0.0369977	-0.084762	-0.0334945	-0.0374585	-0.0180137	-0.0174768
1194.34	39.142	-0.0710023	0.0549668	-0.0167553	-0.0535604	0.00234711	-0.0620284	0.0887565	0.048189	-0.0269576	-0.022482	0.033525	0.040227	-0.0778379	0.140055	-0.00707895	0.0223974	-0.0236944	-0.0197449	2.04114e-05	-0.0423819	-0.0258601	-0.00976429	-0.0427884	-0.0105495	-0.024541	-0.0515064	-0.011924	-0.0159238	-0.0347304	0.00242843	-0.0131358	-0.0295005	-0.0228535	-0.0450199	-0.0283577	-0.0278338	-0.0298281	-0.0295604	-0.0107828	-0.0629953	-0.0143178	-0.0281179	-0.0365705	-0.0825091	-0.0332368	-0.037205	-0.0182425	-0.0188011
1197.56	39.1961	-0.0703539	0.0545104	-0.0198871	-0.0512646	0.00209921	-0.0625829	0.0919734	0.0483233	-0.0266243	-0.0207048	0.033489	0.0415497	-0.0784068	0.137816	-0.00716087	0.0217106	-0.0255068	-0.0194988	0.000572697	-0.0425479	-0.023875	-0.00957025	-0.0426277	-0.00920873	-0.0252446	-0.0514513	-0.0117736	-0.0176615	-0.0356576	0.00176803	-0.0145536	-0.0288282	-0.0229225	-0.0456717	-0.0269622	-0.0276796	-0.0300544	-0.0284152	-0.0113875	-0.0634177	-0.0137785	-0.0285356	-0.0360747	-0.0798541	-0.0329885	-0.0368861	-0.0185965	-0.0202057
1200.8	39.2502	-0.0694404	0.0537808	-0.0230713	-0.0488047	0.00174392	-0.0628584	0.0952775	0.0484536	-0.0262288	-0.0188609	0.0334073	0.0430026	-0.0790804	0.135492	-0.00724015	0.0208203	-0.0272882	-0.0191367	0.00108378	-0.0425856	-0.0219595	-0.00946695	-0.0423677	-0.00788483	-0.0260184	-0.0513935	-0.0116833	-0.0194753	-0.036537	0.000986213	-0.0159378	-0.0281157	-0.0229504	-0.0461745	-0.0256214	-0.0275661	-0.0302168	-0.0272634	-0.0121499	-0.0638323	-0.0133004	-0.028996	-0.0355186	-0.0768309	-0.0327807	-0.0364921	-0.0190792	-0.0216913
1204.08	39.3043	-0.0682184	0.0527852	-0.0263018	-0.0461966	0.00126213	-0.0628743	0.0986472	0.0485658	-0.0257981	-0.0169655	0.0332756	0.0445875	-0.0798412	0.133105	-0.00731703	0.0197455	-0.0290472	-0.0186485	0.00155089	-0.0425153	-0.0201267	-0.00949381	-0.0420081	-0.00657889	-0.0268689	-0.0513342	-0.011633	-0.0213539	-0.0373601	9.18367e-05	-0.0172949	-0.0273493	-0.0229412	-0.0465293	-0.0243386	-0.0275035	-0.0303345	-0.0261101	-0.0130609	-0.0642204	-0.0128989	-0.029503	-0.0349115	-0.0734772	-0.0326431	-0.0360166	-0.0196909	-0.0232581
1207.36	39.3583	-0.066649	0.0515347	-0.0295705	-0.0434579	0.000631628	-0.0626542	0.102055	0.0486462	-0.0253581	-0.0150339	0.0330938	0.0463049	-0.0806662	0.13068	-0.00739174	0.0185074	-0.0307918	-0.018031	0.00197358	-0.0423583	-0.0183874	-0.00968732	-0.0415521	-0.00528826	-0.0277998	-0.0512722	-0.0116057	-0.0232809	-0.0381227	-0.000900925	-0.0186351	-0.0265149	-0.0229017	-0.0467426	-0.0231138	-0.0274971	-0.030427	-0.0249573	-0.0141064	-0.0645587	-0.0125882	-0.0300552	-0.034263	-0.0698346	-0.0326001	-0.0354599	-0.0204276	-0.0249054
1210.63	39.4124	-0.0646999	0.0500456	-0.0328659	-0.0406073	-0.000171124	-0.0622255	0.10547	0.048681	-0.0249324	-0.0130806	0.0328651	0.048152	-0.0815282	0.128242	-0.00746454	0.0171279	-0.0325291	-0.0172883	0.00235296	-0.0421345	-0.0167507	-0.0100775	-0.0410062	-0.00400648	-0.0288119	-0.0512038	-0.0115885	-0.0252358	-0.0388234	-0.0019738	-0.0199717	-0.0256005	-0.0228408	-0.0468241	-0.0219449	-0.0275463	-0.0305156	-0.0238048	-0.0152684	-0.0648199	-0.01238	-0.0306463	-0.0335831	-0.0659527	-0.0326686	-0.0348292	-0.021281	-0.0266321
1213.83	39.4665	-0.0623467	0.0483401	-0.036172	-0.0376629	-0.00116878	-0.0616188	0.108855	0.0486567	-0.0245412	-0.0111196	0.0325954	0.0501226	-0.0823972	0.125819	-0.00753569	0.0156287	-0.0342643	-0.016432	0.00268982	-0.0418608	-0.0152257	-0.0106853	-0.0403794	-0.00272376	-0.0299031	-0.0511224	-0.0115733	-0.027195	-0.0394615	-0.003106	-0.0213202	-0.0245991	-0.0227698	-0.0467863	-0.0208283	-0.0276458	-0.0306238	-0.0226514	-0.0165259	-0.064975	-0.0122814	-0.0312668	-0.0328811	-0.0618882	-0.0328559	-0.0341381	-0.0222391	-0.0284371
1217.08	39.5205	-0.0595741	0.0464449	-0.0394677	-0.0346411	-0.00238011	-0.0608648	0.112175	0.0485596	-0.0241999	-0.00916397	0.0322926	0.0522058	-0.0832419	0.123439	-0.00760547	0.0140305	-0.0360015	-0.0154796	0.00298281	-0.0415497	-0.0138225	-0.0115211	-0.0396819	-0.00142854	-0.031068	-0.0510196	-0.0115553	-0.0291332	-0.040035	-0.00427641	-0.0226968	-0.0235091	-0.0227018	-0.0466434	-0.0197608	-0.0277871	-0.0307752	-0.0214967	-0.0178557	-0.0649966	-0.0122946	-0.0319067	-0.0321632	-0.0577043	-0.0331604	-0.0334059	-0.0232885	-0.0303197
1220.33	39.5746	-0.0563774	0.0443887	-0.0427272	-0.0315585	-0.00381761	-0.0599931	0.115395	0.0483755	-0.0239185	-0.00722592	0.0319659	0.0543875	-0.0840302	0.12113	-0.00767416	0.0123536	-0.037743	-0.0144526	0.00322772	-0.0412091	-0.0125518	-0.0125859	-0.0389245	-0.000109369	-0.0322983	-0.0508854	-0.0115311	-0.0310237	-0.0405383	-0.00546463	-0.0241182	-0.022335	-0.0226508	-0.0464108	-0.018741	-0.0279593	-0.0309917	-0.0203426	-0.0192339	-0.0648617	-0.0124165	-0.0325585	-0.0314325	-0.0534656	-0.0335735	-0.0326567	-0.0244155	-0.0322795
1223.6	39.6287	-0.0527607	0.0421989	-0.0459214	-0.0284337	-0.00548712	-0.0590317	0.118481	0.0480913	-0.0237001	-0.00531659	0.0316251	0.0566505	-0.0847315	0.118919	-0.00774205	0.0106175	-0.0394886	-0.013375	0.0034176	-0.0408435	-0.0114253	-0.0138729	-0.0381162	0.00124337	-0.0335828	-0.0507096	-0.011498	-0.0328397	-0.0409626	-0.00665227	-0.0256005	-0.0210859	-0.0226308	-0.0461036	-0.0177702	-0.0281508	-0.0312909	-0.0191945	-0.020637	-0.0645535	-0.0126398	-0.0332187	-0.0306884	-0.0492348	-0.0340805	-0.0319166	-0.0256076	-0.0343165
1226.81	39.6828	-0.0487391	0.0398976	-0.0490204	-0.0252886	-0.00738825	-0.0580073	0.121402	0.0476958	-0.0235411	-0.00344663	0.0312804	0.0589765	-0.0853165	0.116831	-0.00780944	0.00884011	-0.041235	-0.0122719	0.00354331	-0.0404538	-0.0104537	-0.0153691	-0.037264	0.0026365	-0.0349085	-0.0504812	-0.0114532	-0.034555	-0.0412971	-0.00782386	-0.0271584	-0.0197744	-0.0226546	-0.0457356	-0.0168516	-0.0283496	-0.0316833	-0.0180615	-0.0220425	-0.0640609	-0.0129535	-0.0338885	-0.0299283	-0.0450683	-0.0346627	-0.0312122	-0.0268546	-0.0364302
1230.02	39.7368	-0.0443364	0.0375003	-0.0519961	-0.0221469	-0.00951589	-0.0569433	0.12413	0.0471797	-0.0234301	-0.00162681	0.0309414	0.0613476	-0.0857592	0.114891	-0.00787662	0.00703612	-0.0429757	-0.0111681	0.00359442	-0.0400374	-0.00964571	-0.0170562	-0.036372	0.00407332	-0.0362618	-0.0501893	-0.011395	-0.0361463	-0.0415308	-0.00896804	-0.0288029	-0.0184168	-0.0227333	-0.045318	-0.0159891	-0.0285451	-0.0321706	-0.0169558	-0.0234294	-0.0633788	-0.0133428	-0.0345722	-0.029148	-0.0410143	-0.0352989	-0.0305679	-0.0281481	-0.0386189
1233.25	39.7909	-0.039585	0.035017	-0.0548223	-0.0190322	-0.0118617	-0.055861	0.126638	0.0465361	-0.0233494	0.000132255	0.0306182	0.0637483	-0.0860394	0.11312	-0.0079439	0.005217	-0.0447022	-0.0100872	0.00355918	-0.0395879	-0.00900699	-0.0189106	-0.0354413	0.00555283	-0.037628	-0.0498218	-0.011323	-0.0375935	-0.0416541	-0.0100793	-0.0305393	-0.0170336	-0.0228751	-0.0448594	-0.0151853	-0.0287288	-0.0327456	-0.0158922	-0.0247785	-0.0625093	-0.0137897	-0.0352749	-0.028342	-0.0371108	-0.0359675	-0.0300053	-0.0294827	-0.0408798
1236.53	39.845	-0.0345248	0.0324537	-0.0574755	-0.015966	-0.014415	-0.0547776	0.128904	0.0457588	-0.0232763	0.00182019	0.0303208	0.0661658	-0.0861453	0.111535	-0.00801159	0.00339085	-0.0464042	-0.00905106	0.00342502	-0.0390945	-0.00853898	-0.0209033	-0.0344695	0.00706952	-0.0389911	-0.0493664	-0.0112389	-0.0388827	-0.0416589	-0.0111577	-0.0323665	-0.0156496	-0.0230851	-0.0443659	-0.0144405	-0.0288966	-0.0333918	-0.0148863	-0.0260731	-0.0614622	-0.0142736	-0.036	-0.0275055	-0.0333859	-0.0366476	-0.0295422	-0.0308558	-0.0432093
1239.84	39.8991	-0.0292018	0.0298134	-0.0599345	-0.0129655	-0.0171625	-0.0537069	0.130906	0.044842	-0.0231859	0.00342801	0.0300589	0.0685905	-0.0860753	0.110151	-0.00807998	0.0015623	-0.0480721	-0.008079	0.00317853	-0.0385442	-0.00823809	-0.0230013	-0.0334508	0.00861315	-0.0403326	-0.0488093	-0.0111452	-0.0400067	-0.0415389	-0.0122102	-0.034278	-0.0142929	-0.0233664	-0.0438405	-0.0137526	-0.0290492	-0.0340837	-0.0139539	-0.0272996	-0.0602547	-0.0147724	-0.0367486	-0.0266353	-0.0298577	-0.0373189	-0.0291916	-0.0322679	-0.0456033
1243.14	39.9531	-0.0236686	0.0270967	-0.0621787	-0.0100434	-0.0200874	-0.0526574	0.13263	0.0437801	-0.0230521	0.0049483	0.0298411	0.0710168	-0.0858365	0.108982	-0.00814936	-0.000267232	-0.0496981	-0.00718811	0.00280552	-0.0379223	-0.00809533	-0.0251702	-0.0323772	0.010169	-0.0416318	-0.0481368	-0.0110426	-0.0409653	-0.0412887	-0.0132498	-0.0362623	-0.0129956	-0.0237207	-0.0432847	-0.0131182	-0.0291923	-0.0347895	-0.0131091	-0.0284488	-0.0589109	-0.0152649	-0.0375195	-0.0257316	-0.0265353	-0.0379636	-0.0289614	-0.0337223	-0.0480578
1246.33	40.0072	-0.0179836	0.0243015	-0.0641895	-0.0072078	-0.0231689	-0.0516313	0.134066	0.0425695	-0.0228494	0.00637548	0.0296744	0.0734433	-0.0854438	0.108038	-0.00822003	-0.00209864	-0.0512763	-0.00639263	0.00229115	-0.0372157	-0.00809667	-0.0273773	-0.0312388	0.0117187	-0.0428667	-0.0473349	-0.0109297	-0.0417655	-0.0409026	-0.0142935	-0.0383047	-0.0117931	-0.0241506	-0.0426986	-0.0125329	-0.0293358	-0.035475	-0.0123629	-0.0295162	-0.0574604	-0.0157339	-0.038309	-0.024799	-0.0234187	-0.0385681	-0.0288526	-0.0352258	-0.0505686
1249.56	40.0613	-0.0122103	0.0214237	-0.0659515	-0.00446285	-0.026382	-0.0506234	0.135211	0.0412102	-0.0225534	0.00770617	0.0295636	0.0758722	-0.0849177	0.107327	-0.00829226	-0.00393454	-0.052803	-0.00570265	0.00162053	-0.0364149	-0.00822365	-0.0295938	-0.030025	0.0132408	-0.0440156	-0.0463911	-0.0108029	-0.0424207	-0.0403742	-0.0153609	-0.0403864	-0.0107216	-0.02466	-0.0420814	-0.0119911	-0.0294931	-0.0361064	-0.0117232	-0.030502	-0.0559362	-0.0161673	-0.0391113	-0.0238467	-0.0205005	-0.0391236	-0.0288583	-0.036787	-0.0531315
1252.75	40.1154	-0.00641543	0.0184578	-0.0674541	-0.00181011	-0.0296995	-0.0496229	0.136072	0.039707	-0.0221416	0.00893964	0.02951	0.0783072	-0.0842826	0.106857	-0.00836634	-0.00577761	-0.0542757	-0.0051234	0.000779949	-0.0355153	-0.00845421	-0.031797	-0.0287241	0.0147114	-0.0450586	-0.0452967	-0.0106577	-0.0429503	-0.039697	-0.0164717	-0.0424851	-0.00981503	-0.0252537	-0.0414308	-0.0114856	-0.02968	-0.0366527	-0.0111948	-0.0314098	-0.0543728	-0.0165582	-0.0399176	-0.0228865	-0.0177649	-0.0396266	-0.0289629	-0.0384156	-0.0557419
1255.9	40.1694	-0.000667177	0.0153988	-0.068694	0.000750688	-0.0330928	-0.0486132	0.136664	0.0380676	-0.0215944	0.010078	0.0295119	0.0807534	-0.0835652	0.106631	-0.00844252	-0.00762923	-0.0556922	-0.00465521	-0.000241008	-0.0345177	-0.00876231	-0.0339721	-0.0273242	0.016106	-0.0459793	-0.0440488	-0.01049	-0.0433778	-0.0388644	-0.0176436	-0.044576	-0.00910095	-0.0259361	-0.040743	-0.0110076	-0.0299125	-0.0370857	-0.0107799	-0.0322466	-0.0528032	-0.0169046	-0.0407158	-0.021933	-0.0151891	-0.0400793	-0.029142	-0.0401206	-0.0583945
1259.15	40.2235	0.00496689	0.0122415	-0.0696754	0.00322024	-0.0365332	-0.0475742	0.137007	0.0363015	-0.0208963	0.0111271	0.0295644	0.0832173	-0.0827937	0.106647	-0.00852102	-0.00948832	-0.0570503	-0.00429429	-0.00144772	-0.0334278	-0.0091178	-0.0361115	-0.0258139	0.0174005	-0.0467659	-0.0426515	-0.0102991	-0.04373	-0.0378714	-0.0188902	-0.0466334	-0.00859822	-0.0267103	-0.0400124	-0.0105471	-0.0302051	-0.0373818	-0.010477	-0.033021	-0.0512561	-0.017209	-0.0414909	-0.021002	-0.0127431	-0.0404879	-0.0293642	-0.0419078	-0.0610829
1262.43	40.2776	0.0104224	0.00898079	-0.0704093	0.00559897	-0.0399919	-0.0464833	0.137124	0.0344179	-0.0200381	0.0120962	0.0296591	0.0857057	-0.0819956	0.106901	-0.00860205	-0.0113512	-0.0583471	-0.00403423	-0.00283919	-0.0322566	-0.00948658	-0.0382143	-0.0241829	0.0185726	-0.0474132	-0.0411152	-0.0100877	-0.0440347	-0.0367176	-0.0202187	-0.0486327	-0.00831501	-0.0275766	-0.0392323	-0.010093	-0.0305692	-0.0375223	-0.0102789	-0.0337418	-0.0497545	-0.0174788	-0.0422251	-0.0201102	-0.0103919	-0.0408621	-0.0295936	-0.0437798	-0.0638003
1265.72	40.3317	0.0156404	0.00561397	-0.0709123	0.00788752	-0.0434409	-0.0453175	0.137041	0.032425	-0.0190177	0.0129973	0.0297845	0.0882244	-0.0811974	0.107382	-0.00868575	-0.013212	-0.059579	-0.00386705	-0.00440695	-0.0310204	-0.00983223	-0.0402828	-0.0224235	0.0196029	-0.0479216	-0.0394553	-0.00986217	-0.044319	-0.035409	-0.0216301	-0.0505519	-0.00824782	-0.0285319	-0.0383954	-0.00963373	-0.0310122	-0.0374947	-0.0101719	-0.0344164	-0.0483137	-0.017725	-0.0428976	-0.0192739	-0.00809776	-0.041213	-0.0297934	-0.0457338	-0.0665391
1268.94	40.3857	0.0205693	0.00214373	-0.0712039	0.0100887	-0.0468533	-0.0440556	0.136785	0.0303317	-0.0178401	0.0138424	0.0299268	0.0907759	-0.0804245	0.108075	-0.00877224	-0.0150628	-0.060741	-0.00378459	-0.00613519	-0.0297394	-0.0101177	-0.0423195	-0.0205317	0.0204758	-0.0482976	-0.037691	-0.00963148	-0.044608	-0.0339593	-0.0231188	-0.0523728	-0.00838301	-0.0295696	-0.037495	-0.00915835	-0.0315375	-0.0372934	-0.0101361	-0.0350513	-0.0469415	-0.0179613	-0.0434857	-0.0185083	-0.00582385	-0.0415525	-0.0299301	-0.0477612	-0.0692916
1272.16	40.4398	0.0251663	-0.00141913	-0.0713042	0.0122089	-0.0502033	-0.0426787	0.136379	0.0281489	-0.0165169	0.0146428	0.0300708	0.0933593	-0.0797001	0.10896	-0.00886158	-0.0168942	-0.0618271	-0.00378049	-0.00800279	-0.0284365	-0.0103075	-0.0443241	-0.018508	0.021181	-0.0485518	-0.0358438	-0.00940689	-0.044922	-0.0323896	-0.0246721	-0.0540808	-0.00869939	-0.0306804	-0.0365257	-0.00865768	-0.0321453	-0.0369213	-0.0101456	-0.035653	-0.0456392	-0.0182024	-0.0439653	-0.0178259	-0.00353901	-0.0418905	-0.029976	-0.0498472	-0.0720496
1275.43	40.4939	0.0293971	-0.00505488	-0.0712321	0.0142585	-0.053465	-0.0411703	0.135848	0.0258908	-0.0150648	0.0154081	0.0302009	0.0959704	-0.0790436	0.110015	-0.00895376	-0.0186959	-0.0628307	-0.00385096	-0.00998474	-0.0271364	-0.0103707	-0.0462922	-0.0163592	0.0217133	-0.0486972	-0.0339358	-0.00920159	-0.0452747	-0.0307262	-0.0262705	-0.0556645	-0.00917032	-0.0318529	-0.0354861	-0.0081252	-0.0328328	-0.0363877	-0.0101715	-0.0362295	-0.0444039	-0.0184634	-0.0443132	-0.017235	-0.00122191	-0.0422347	-0.0299113	-0.0519707	-0.0748049
1278.7	40.5479	0.0332354	-0.0087361	-0.0710026	0.01625	-0.0566123	-0.0395176	0.135213	0.0235757	-0.0135054	0.0161463	0.0303034	0.0986019	-0.0784706	0.11122	-0.00904858	-0.0204569	-0.0637441	-0.00399431	-0.0120528	-0.025865	-0.0102828	-0.0482158	-0.0140993	0.022073	-0.0487468	-0.0319892	-0.00902953	-0.0456728	-0.028999	-0.0278886	-0.0571146	-0.00976485	-0.0330746	-0.0343785	-0.00755851	-0.0335936	-0.0357085	-0.0101841	-0.03679	-0.0432306	-0.0187593	-0.0445083	-0.0167394	0.00113504	-0.0425891	-0.029725	-0.0541055	-0.0775496
1281.98	40.602	0.0366615	-0.0124299	-0.0706274	0.0181937	-0.0596195	-0.0377125	0.134494	0.0212254	-0.0118636	0.0168637	0.0303669	0.101243	-0.0779917	0.112555	-0.0091454	-0.0221658	-0.0645586	-0.00420912	-0.0141765	-0.0246476	-0.0100281	-0.0500857	-0.0117484	0.0222642	-0.0487128	-0.0300265	-0.00890459	-0.0461151	-0.0272385	-0.0294962	-0.0584233	-0.0104484	-0.0343312	-0.0332076	-0.00695996	-0.0344165	-0.0349064	-0.0101556	-0.0373446	-0.0421137	-0.0191047	-0.044533	-0.0163391	0.00352307	-0.0429534	-0.0294138	-0.0562205	-0.0802766
1285.19	40.6561	0.0396631	-0.0161011	-0.0701154	0.0200955	-0.0624625	-0.0357521	0.133711	0.0188638	-0.0101665	0.017565	0.0303833	0.103881	-0.0776134	0.114003	-0.00924286	-0.0238111	-0.0652637	-0.00449328	-0.016324	-0.0235065	-0.00959997	-0.0518914	-0.00933231	0.0222939	-0.0486063	-0.0280708	-0.00883981	-0.0465944	-0.0254752	-0.0310602	-0.0595841	-0.0111845	-0.035607	-0.0319795	-0.0063364	-0.0352857	-0.0340102	-0.0100627	-0.0379031	-0.0410484	-0.0195129	-0.0443748	-0.0160308	0.00591933	-0.0433215	-0.0289817	-0.0582827	-0.0829801
1288.44	40.7102	0.0422359	-0.0197146	-0.0694736	0.0219553	-0.0651203	-0.0336381	0.132877	0.0165143	-0.0084421	0.0182533	0.030349	0.106497	-0.0773382	0.115552	-0.00933825	-0.0253822	-0.0658481	-0.0048429	-0.0184631	-0.0224586	-0.00899982	-0.053623	-0.00688005	0.0221705	-0.0484379	-0.0261458	-0.00884868	-0.0470981	-0.0237393	-0.0325479	-0.0605917	-0.0119373	-0.0368843	-0.0306996	-0.00569828	-0.0361808	-0.0330519	-0.00988856	-0.0384725	-0.040032	-0.0199937	-0.0440269	-0.0158087	0.00829026	-0.0436818	-0.02844	-0.060259	-0.0856545
1291.65	40.7642	0.0443845	-0.0232371	-0.0687071	0.0237662	-0.0675773	-0.0313773	0.131998	0.014198	-0.00671813	0.0189303	0.030267	0.109072	-0.077166	0.117191	-0.00942687	-0.0268708	-0.0662997	-0.00525299	-0.020561	-0.0215143	-0.00823701	-0.0552703	-0.00442223	0.0219035	-0.0482171	-0.0242755	-0.00894506	-0.0476101	-0.0220607	-0.0339296	-0.0614428	-0.0126729	-0.0381444	-0.0293723	-0.005058	-0.0370795	-0.0320631	-0.00962318	-0.0390561	-0.0390653	-0.0205527	-0.0434888	-0.0156651	0.0105976	-0.0440184	-0.0278072	-0.0621185	-0.088295
1294.88	40.8183	0.0461219	-0.0266385	-0.0678188	0.0255165	-0.0698222	-0.0289799	0.131076	0.0119321	-0.00502083	0.0195964	0.0301464	0.111584	-0.0770959	0.118914	-0.0095011	-0.0282717	-0.0666079	-0.00571937	-0.0225862	-0.020677	-0.00732867	-0.0568235	-0.00198882	0.021504	-0.047952	-0.0224838	-0.00914318	-0.0481102	-0.0204675	-0.0351796	-0.0621356	-0.0133621	-0.0393674	-0.0280011	-0.00442939	-0.0379606	-0.0310707	-0.00926356	-0.0396523	-0.0381529	-0.0211909	-0.0427667	-0.0155909	0.0128023	-0.0443127	-0.0271081	-0.0638328	-0.0908963
1298.13	40.8724	0.0474683	-0.0298933	-0.0668097	0.0271913	-0.0718489	-0.0264611	0.130104	0.00972863	-0.00337438	0.0202511	0.030003	0.114012	-0.0771272	0.120718	-0.00954946	-0.0295839	-0.0667638	-0.00624005	-0.0245095	-0.019944	-0.00630048	-0.0582726	0.00039163	0.0209841	-0.0476477	-0.0207911	-0.00945608	-0.0485761	-0.0189861	-0.0362803	-0.0626704	-0.0139811	-0.0405335	-0.0265896	-0.00382721	-0.0388084	-0.0300937	-0.0088135	-0.0402552	-0.037303	-0.021906	-0.0418721	-0.0155759	0.014867	-0.044546	-0.0263728	-0.0653778	-0.0934533
1301.41	40.9265	0.0484477	-0.0329818	-0.0656781	0.0287732	-0.073656	-0.0238392	0.129066	0.00759476	-0.00179939	0.0208928	0.0298577	0.116337	-0.0772591	0.122604	-0.00955533	-0.0308105	-0.0667615	-0.00681521	-0.0263059	-0.0193066	-0.00518635	-0.0596079	0.00269237	0.0203568	-0.0473063	-0.0192143	-0.00989303	-0.0489838	-0.0176391	-0.0372229	-0.0630492	-0.0145126	-0.0416227	-0.0251421	-0.00326711	-0.0396138	-0.0291416	-0.00828321	-0.0408543	-0.0365268	-0.0226933	-0.0408214	-0.0156094	0.0167571	-0.0447023	-0.025634	-0.0667352	-0.0959612
1304.73	40.9805	0.0490872	-0.0358901	-0.0644207	0.0302425	-0.0752475	-0.0211361	0.127944	0.00553322	-0.000312165	0.0215191	0.0297354	0.118545	-0.0774904	0.124581	-0.0094958	-0.0319581	-0.0665967	-0.0074462	-0.0279563	-0.0187516	-0.00402721	-0.0608224	0.00488924	0.0196345	-0.0469268	-0.0177643	-0.0104576	-0.0493081	-0.0164439	-0.0380075	-0.063273	-0.0149472	-0.0426181	-0.0236649	-0.0027647	-0.0403757	-0.0282151	-0.00768831	-0.0414365	-0.0358374	-0.0235474	-0.0396348	-0.0156803	0.018442	-0.0447696	-0.024924	-0.0678936	-0.0984154
1308.06	41.0346	0.0494149	-0.0386104	-0.0630323	0.0315768	-0.0766316	-0.0183759	0.12671	0.00354449	0.00107512	0.022127	0.0296635	0.120627	-0.0778194	0.126665	-0.00934035	-0.0330362	-0.066266	-0.00813472	-0.0294473	-0.018261	-0.00286921	-0.0619127	0.00696219	0.018828	-0.0465052	-0.0164475	-0.0111483	-0.0495247	-0.015411	-0.0386411	-0.0633405	-0.0152825	-0.0435067	-0.0221661	-0.0023347	-0.0410991	-0.0273093	-0.00704798	-0.0419859	-0.0352495	-0.0244631	-0.0383352	-0.015777	0.0198931	-0.0447405	-0.0242713	-0.0688498	-0.100812
1311.22	41.0887	0.0494583	-0.041142	-0.0615083	0.0327501	-0.0778208	-0.0155839	0.125338	0.00162841	0.00235488	0.0227123	0.0296696	0.122577	-0.0782431	0.12888	-0.00904953	-0.0340563	-0.0657665	-0.0088811	-0.0307713	-0.017813	-0.00176097	-0.0628808	0.00889567	0.0179454	-0.0460359	-0.0152658	-0.011958	-0.0496124	-0.0145436	-0.0391371	-0.0632474	-0.0155238	-0.044281	-0.0206547	-0.00198813	-0.0417936	-0.0264155	-0.00638347	-0.0424857	-0.0347772	-0.025436	-0.0369469	-0.0158893	0.0210846	-0.0446118	-0.023698	-0.069609	-0.103147
1314.42	41.1428	0.0492429	-0.0434908	-0.0598465	0.0337325	-0.0788317	-0.0127847	0.1238	-0.000214902	0.00352391	0.0232697	0.0297808	0.124394	-0.0787572	0.131251	-0.00857384	-0.0350313	-0.0650958	-0.00968382	-0.0319241	-0.017382	-0.000749309	-0.0637349	0.0106794	0.0169921	-0.0455124	-0.0142183	-0.0128759	-0.049554	-0.0138372	-0.0395131	-0.062987	-0.015683	-0.0449394	-0.0191396	-0.00173112	-0.0424702	-0.025523	-0.00571611	-0.0429177	-0.0344317	-0.0264621	-0.0354943	-0.0160091	0.0219929	-0.0443842	-0.0232184	-0.0701828	-0.105418
1317.64	41.1968	0.0487919	-0.0456705	-0.058047	0.0344902	-0.0796847	-0.0100014	0.122069	-0.00198514	0.00458248	0.0237926	0.0300223	0.126085	-0.0793559	0.133804	-0.00785276	-0.0359758	-0.0642518	-0.010539	-0.0329041	-0.0169391	0.000123919	-0.0644886	0.0123085	0.0159712	-0.0449284	-0.0133026	-0.0138899	-0.0493377	-0.0132802	-0.0397904	-0.0625542	-0.0157781	-0.0454862	-0.0176279	-0.00156492	-0.0431387	-0.02462	-0.00506439	-0.043262	-0.0342187	-0.0275377	-0.0340005	-0.0161319	0.0225969	-0.0440611	-0.0228393	-0.0705891	-0.10762
1320.88	41.2509	0.0481287	-0.0477007	-0.0561123	0.034988	-0.0804047	-0.00725462	0.120119	-0.00368285	0.0055334	0.0242733	0.0304169	0.127659	-0.0800307	0.136563	-0.00681409	-0.0369052	-0.0632338	-0.011441	-0.0337106	-0.0164538	0.000824739	-0.0651595	0.0137841	0.0148853	-0.0442787	-0.0125153	-0.0149868	-0.0489575	-0.0128557	-0.0399924	-0.061947	-0.015831	-0.0459314	-0.0161243	-0.0014867	-0.0438067	-0.0236947	-0.00444085	-0.0434957	-0.0341368	-0.0286584	-0.0324871	-0.0162562	0.0228786	-0.0436479	-0.0225605	-0.0708492	-0.109751
1324.1	41.305	0.0472783	-0.0496048	-0.054048	0.0351913	-0.08102	-0.00456331	0.117928	-0.00531087	0.00637929	0.024703	0.0309845	0.129135	-0.08077	0.139544	-0.00537373	-0.0378352	-0.0620431	-0.0123829	-0.034345	-0.015896	0.00132867	-0.0657672	0.0151125	0.0137362	-0.04356	-0.0118509	-0.0161524	-0.0484125	-0.0125441	-0.0401433	-0.0611706	-0.0158646	-0.0462888	-0.0146321	-0.00149117	-0.044478	-0.0227363	-0.00384897	-0.0435916	-0.0341768	-0.0298189	-0.0309731	-0.0163827	0.0228242	-0.0431518	-0.0223765	-0.0709864	-0.111809
1327.33	41.359	0.0462694	-0.0514053	-0.0518616	0.035069	-0.0815618	-0.00194422	0.115478	-0.00687616	0.0071219	0.025072	0.0317421	0.13053	-0.0815587	0.142752	-0.00343603	-0.0387809	-0.060683	-0.013358	-0.0348102	-0.0152379	0.00162164	-0.0663301	0.0163039	0.0125258	-0.0427725	-0.0113017	-0.017372	-0.0477054	-0.0123257	-0.0402661	-0.060238	-0.0159001	-0.0465747	-0.013153	-0.00157219	-0.0451526	-0.0217339	-0.00328147	-0.0435179	-0.0343229	-0.0310125	-0.0294749	-0.0165134	0.0224247	-0.0425825	-0.0222792	-0.0710229	-0.113791
1330.66	41.4131	0.0451344	-0.053122	-0.0495618	0.0345964	-0.0820625	0.000587596	0.112755	-0.00838923	0.00776168	0.0253693	0.0327029	0.131867	-0.0823783	0.146185	-0.00089446	-0.0397552	-0.0591598	-0.0143611	-0.0351123	-0.0144553	0.00169858	-0.0668623	0.0173713	0.0112585	-0.0419188	-0.0108572	-0.0186301	-0.0468405	-0.0121829	-0.0403805	-0.0591698	-0.0159556	-0.0468072	-0.0116892	-0.00172379	-0.0458267	-0.0206741	-0.00271914	-0.0432385	-0.034554	-0.0322315	-0.0280068	-0.0166496	0.0216757	-0.041952	-0.0222596	-0.0709774	-0.115696
1333.98	41.4672	0.0439084	-0.0547701	-0.047158	0.0337574	-0.0825525	0.00301907	0.10975	-0.0098627	0.00829812	0.0255842	0.0338755	0.133164	-0.0832055	0.149831	0.00236686	-0.0407676	-0.0574828	-0.0153898	-0.0352613	-0.0135288	0.00156268	-0.0673715	0.0183285	0.00994084	-0.0410047	-0.0105036	-0.0199114	-0.0458222	-0.0121014	-0.0405024	-0.0579919	-0.0160451	-0.0470039	-0.0102447	-0.00194083	-0.0464928	-0.0195376	-0.00213033	-0.0427134	-0.034846	-0.033468	-0.0265818	-0.0167917	0.0205763	-0.041275	-0.0223096	-0.0708641	-0.11752
1337.19	41.5213	0.0426267	-0.0563595	-0.0446585	0.0325455	-0.0830581	0.00533773	0.106461	-0.0113094	0.00873027	0.0257066	0.035264	0.134441	-0.0840125	0.153671	0.00647133	-0.0418233	-0.0556652	-0.0164449	-0.035271	-0.012444	0.00122355	-0.0678586	0.0191864	0.00858303	-0.0400375	-0.0102239	-0.0212007	-0.0446542	-0.0120701	-0.0406416	-0.0567336	-0.0161774	-0.0471818	-0.00882651	-0.00221969	-0.047139	-0.0182958	-0.00147032	-0.0418965	-0.0351743	-0.0347143	-0.0252133	-0.0169391	0.0191243	-0.0405681	-0.0224232	-0.0706904	-0.119261
1340.4	41.5753	0.0413221	-0.0578953	-0.0420718	0.0309629	-0.0835982	0.00752997	0.102892	-0.0127394	0.00905772	0.0257285	0.0368668	0.135717	-0.0847674	0.157681	0.0115476	-0.0429217	-0.0537232	-0.0175286	-0.0351592	-0.0111916	0.000695156	-0.0683174	0.0199527	0.00719817	-0.039026	-0.00999953	-0.0224831	-0.0433393	-0.0120796	-0.0408029	-0.0554246	-0.0163569	-0.0473548	-0.0074448	-0.00255792	-0.0477484	-0.0169099	-0.000680371	-0.0407339	-0.035515	-0.0359629	-0.0239145	-0.0170901	0.0173135	-0.0398484	-0.0225955	-0.070457	-0.120914
1343.61	41.6294	0.0400223	-0.0593776	-0.039408	0.0290209	-0.0841841	0.00958214	0.0990569	-0.0141581	0.0092823	0.0256445	0.0386769	0.137005	-0.0854363	0.161837	0.0177271	-0.0440562	-0.0516755	-0.0186425	-0.0349465	-0.00976614	-5.64552e-06	-0.0687359	0.0206313	0.00580111	-0.0379802	-0.00981118	-0.0237436	-0.0418789	-0.0121221	-0.0409868	-0.0540928	-0.016584	-0.0475329	-0.00611121	-0.00295413	-0.0482979	-0.0153294	0.000312772	-0.0391602	-0.0358466	-0.0372051	-0.0226984	-0.0172426	0.0151326	-0.0391305	-0.0228226	-0.0701591	-0.122473
1346.8	41.6835	0.038749	-0.0608024	-0.0366792	0.0267388	-0.0848195	0.0114788	0.0949755	-0.0155653	0.00940978	0.0254524	0.0406823	0.138319	-0.085984	0.166112	0.0251416	-0.0452128	-0.0495425	-0.0197856	-0.0346554	-0.00816709	-0.00085968	-0.0690981	0.0212231	0.00440663	-0.0369096	-0.00964102	-0.024968	-0.0402763	-0.0121899	-0.0411899	-0.0527623	-0.0168563	-0.0477214	-0.00483792	-0.00340825	-0.0487586	-0.0134894	0.00159811	-0.0370949	-0.0361508	-0.0384294	-0.0215758	-0.0173932	0.0125676	-0.0384252	-0.0231023	-0.0697882	-0.123931
1350	41.7376	0.037518	-0.0621601	-0.0338986	0.0241419	-0.0855013	0.0132037	0.0906778	-0.0169545	0.00945188	0.025152	0.0428679	0.139666	-0.0863777	0.170481	0.0339202	-0.0463693	-0.0473456	-0.0209538	-0.0343091	-0.00639882	-0.00184552	-0.0693851	0.0217274	0.00302907	-0.0358227	-0.00947417	-0.0261437	-0.0385363	-0.0122761	-0.041405	-0.0514518	-0.0171691	-0.0479189	-0.00363699	-0.00392137	-0.049098	-0.0113081	0.00328117	-0.0344376	-0.0364151	-0.0396203	-0.0205561	-0.0175379	0.00960628	-0.0377379	-0.0234345	-0.0693343	-0.125279
1353.18	41.7916	0.0363393	-0.0634364	-0.0310788	0.0212605	-0.08622	0.0147384	0.0862013	-0.0183139	0.0094275	0.0247447	0.0452167	0.14105	-0.0865891	0.174919	0.0441874	-0.0474966	-0.0451065	-0.0221409	-0.0339301	-0.00447138	-0.00294032	-0.0695752	0.0221422	0.00168242	-0.0347269	-0.00929985	-0.0272616	-0.0366654	-0.0123731	-0.041622	-0.0501732	-0.0175142	-0.0481156	-0.00251952	-0.00449563	-0.0492842	-0.00868203	0.00548623	-0.031064	-0.0366338	-0.0407597	-0.0196464	-0.0176732	0.00624663	-0.0370695	-0.0238214	-0.0687866	-0.126508
1356.54	41.8457	0.0352157	-0.0646126	-0.0282304	0.0181308	-0.0869582	0.0160643	0.0815892	-0.0196262	0.00936465	0.0242318	0.04771	0.14247	-0.086596	0.179404	0.0560601	-0.0485597	-0.0428465	-0.0233389	-0.0335398	-0.00240099	-0.00412198	-0.0696445	0.022464	0.000379832	-0.0336282	-0.00911116	-0.0283155	-0.0346723	-0.0124724	-0.0418294	-0.0489299	-0.0178779	-0.0482905	-0.00149486	-0.00513409	-0.0492882	-0.0054815	0.00835997	-0.026822	-0.0368081	-0.0418279	-0.0188518	-0.0177982	0.00249937	-0.0364178	-0.0242667	-0.0681344	-0.127605
1359.95	41.8998	0.0341415	-0.0656671	-0.0253626	0.0147924	-0.0876923	0.0171621	0.076891	-0.0208687	0.00930462	0.0236157	0.0503282	0.143921	-0.086384	0.183918	0.0696458	-0.0495184	-0.0405835	-0.0245379	-0.0331573	-0.000211089	-0.00537008	-0.0695674	0.0226886	-0.000867034	-0.0325317	-0.00890491	-0.0293012	-0.0325676	-0.0125654	-0.0420174	-0.0477136	-0.0182387	-0.048408	-0.000569774	-0.00584021	-0.0490879	-0.00154655	0.0120747	-0.0215275	-0.0369452	-0.0428064	-0.0181746	-0.017915	-0.00161294	-0.0357808	-0.0247735	-0.0673679	-0.128559
1363.16	41.9539	0.0331016	-0.0665765	-0.0224821	0.0112893	-0.0883933	0.0180137	0.072164	-0.0220142	0.00930832	0.0228989	0.0530493	0.145392	-0.0859465	0.188445	0.0850409	-0.0503263	-0.0383291	-0.0257249	-0.0327988	0.00206819	-0.00666529	-0.0693188	0.0228126	-0.00204971	-0.0314419	-0.00868183	-0.0302161	-0.030364	-0.0126437	-0.0421777	-0.0464994	-0.0185628	-0.0484157	0.000251621	-0.00661722	-0.0486694	0.00331737	0.016833	-0.01496	-0.0370574	-0.0436789	-0.0176143	-0.0180293	-0.00605726	-0.0351573	-0.0253422	-0.0664808	-0.129361
1366.31	42.0079	0.0320725	-0.0673153	-0.0195939	0.00766698	-0.0890275	0.0186038	0.0674779	-0.0230301	0.00946454	0.0220845	0.05585	0.146871	-0.0852843	0.192974	0.102328	-0.050929	-0.0360856	-0.0268821	-0.0324775	0.00440127	-0.00798955	-0.068876	0.0228352	-0.00316315	-0.0303612	-0.00844601	-0.0310587	-0.0280773	-0.0126998	-0.0423034	-0.0452413	-0.0187997	-0.0482413	0.000967671	-0.00746691	-0.0480275	0.00934246	0.022873	-0.00685936	-0.0371623	-0.0444335	-0.0171678	-0.0181494	-0.0107915	-0.0345486	-0.0259689	-0.0654708	-0.129999
1369.52	42.062	0.0310221	-0.0678593	-0.0167017	0.00397052	-0.0895565	0.018922	0.0629192	-0.0238763	0.009898	0.021176	0.0587048	0.148339	-0.084405	0.1975	0.121576	-0.0512617	-0.0338413	-0.0279839	-0.0322017	0.00674891	-0.0093258	-0.0682217	0.0227577	-0.00420585	-0.0292902	-0.00820427	-0.0318286	-0.0257247	-0.0127275	-0.0423894	-0.0438661	-0.0188775	-0.0477898	0.00157939	-0.0083877	-0.0471645	0.0167998	0.030473	0.00307795	-0.0372804	-0.0450635	-0.0168281	-0.018286	-0.0157667	-0.0339583	-0.026645	-0.0643407	-0.130464
1372.7	42.1161	0.02991	-0.0681865	-0.0138091	0.00024145	-0.0899401	0.0189654	0.0585978	-0.0245008	0.010779	0.0201774	0.0615877	0.149775	-0.083323	0.202025	0.142838	-0.051246	-0.0315653	-0.0289918	-0.0319744	0.00907019	-0.0106578	-0.0673458	0.0225834	-0.00517896	-0.0282277	-0.00796503	-0.0325266	-0.0233245	-0.0127231	-0.0424313	-0.0422688	-0.0186976	-0.0469389	0.00209103	-0.00937325	-0.0460889	0.0260009	0.0399552	0.0151994	-0.037434	-0.045567	-0.0165839	-0.0184514	-0.0209283	-0.0333909	-0.0273572	-0.0630987	-0.13075
1376.05	42.1702	0.0286905	-0.0682787	-0.0109196	-0.00348318	-0.090139	0.0187378	0.0546544	-0.0248343	0.0123322	0.0190942	0.0644731	0.151155	-0.0820591	0.206552	0.16615	-0.0507849	-0.0292007	-0.0298477	-0.0317929	0.0113243	-0.0119707	-0.0662458	0.0223183	-0.00608566	-0.027171	-0.00773839	-0.0331548	-0.020896	-0.0126846	-0.0424249	-0.0403075	-0.0181288	-0.0455346	0.00251127	-0.0104126	-0.0448133	0.0372982	0.0516885	0.0298976	-0.0376443	-0.0459466	-0.01642	-0.0186584	-0.0262189	-0.0328504	-0.028089	-0.0617562	-0.13085
1379.41	42.2242	0.0273151	-0.0681226	-0.00803735	-0.00717164	-0.0901181	0.0182508	0.05127	-0.0247848	0.0148446	0.0179336	0.0673369	0.152454	-0.0806401	0.211083	0.191531	-0.0497572	-0.0266576	-0.0304669	-0.0316484	0.0134734	-0.013251	-0.0649267	0.0219703	-0.00693115	-0.0261164	-0.00753593	-0.0337166	-0.0184583	-0.0126119	-0.0423661	-0.0377985	-0.0170003	-0.0433855	0.00285382	-0.0114906	-0.0433536	0.0510835	0.0660891	0.0476087	-0.0379299	-0.0462085	-0.0163189	-0.0189197	-0.0315795	-0.0323391	-0.0288214	-0.0603275	-0.130761
1382.61	42.2783	0.0257362	-0.0677085	-0.00516837	-0.0107971	-0.0898473	0.0175228	0.0486759	-0.0242301	0.0186723	0.0167041	0.0701573	0.153644	-0.0790982	0.21562	0.218984	-0.0480089	-0.0238062	-0.0307301	-0.0315266	0.0154855	-0.0144849	-0.0633995	0.02155	-0.00772298	-0.0250606	-0.00737084	-0.0342167	-0.0160299	-0.0125062	-0.0422507	-0.0345116	-0.015095	-0.0402565	0.00313723	-0.0125882	-0.0417273	0.0677863	0.0836208	0.0688128	-0.038306	-0.0463616	-0.0162619	-0.0192473	-0.0369525	-0.0318571	-0.0295339	-0.058828	-0.130481
1385.74	42.3324	0.0239105	-0.0670314	-0.00232054	-0.0143375	-0.089303	0.0165793	0.0471636	-0.0230092	0.0242449	0.0154158	0.0729153	0.154696	-0.07747	0.22016	0.248495	-0.0453446	-0.0204692	-0.0304751	-0.0314087	0.0173363	-0.0156573	-0.0616809	0.0210695	-0.00847067	-0.0240014	-0.00725709	-0.0346623	-0.0136284	-0.0123708	-0.042075	-0.0301676	-0.012142	-0.0358631	0.00338561	-0.013683	-0.0399523	0.0878729	0.104792	0.094029	-0.0387845	-0.0464162	-0.0162311	-0.019651	-0.0422823	-0.0314024	-0.0302058	-0.0572741	-0.130011
1388.99	42.3864	0.021801	-0.0660915	0.000496078	-0.0177762	-0.0884679	0.0154513	0.0470922	-0.0209131	0.0320704	0.0140797	0.0755952	0.155581	-0.0757947	0.224694	0.280031	-0.0415193	-0.0164145	-0.0294876	-0.0312713	0.0190113	-0.01675	-0.0597925	0.0205418	-0.00918438	-0.0229379	-0.00720866	-0.0350628	-0.0112699	-0.0122121	-0.0418367	-0.0244352	-0.00781148	-0.0298671	0.00362857	-0.0147486	-0.0380454	0.111844	0.130153	0.123812	-0.0393737	-0.0463826	-0.0162105	-0.0201389	-0.0475176	-0.0309708	-0.0308181	-0.0556826	-0.129351
1392.22	42.4405	0.0193794	-0.0648954	0.00327017	-0.0211014	-0.0873315	0.0141731	0.0488968	-0.0176751	0.0427344	0.0127076	0.0781841	0.156267	-0.0741116	0.229211	0.313548	-0.0362293	-0.0113496	-0.0274929	-0.0310876	0.0205067	-0.0177421	-0.0577597	0.0199794	-0.00987352	-0.02187	-0.00723882	-0.0354289	-0.0089691	-0.01204	-0.0415352	-0.0169273	-0.00170879	-0.0218732	0.00390043	-0.0157549	-0.0360206	0.140235	0.160289	0.158746	-0.040079	-0.0462709	-0.0161877	-0.020715	-0.0526129	-0.0305556	-0.0313553	-0.0540694	-0.128505
1395.5	42.4946	0.0166282	-0.0634549	0.00598986	-0.0243052	-0.0858896	0.0127802	0.0530923	-0.0129615	0.0568972	0.0113122	0.0806727	0.156726	-0.0724583	0.23369	0.348985	-0.0291056	-0.00491737	-0.0241492	-0.0308273	0.021831	-0.0186097	-0.055611	0.0193926	-0.0105449	-0.0207987	-0.00736014	-0.0357729	-0.0067402	-0.0118656	-0.0411709	-0.00720095	0.00662253	-0.0114294	0.00423826	-0.0166678	-0.0338877	0.173606	0.19581	0.199433	-0.0409022	-0.0460908	-0.0161552	-0.0213795	-0.0575291	-0.0301493	-0.0318064	-0.0524501	-0.127477
1398.77	42.5487	0.0135405	-0.061786	0.00864264	-0.0273834	-0.0841447	0.011307	0.0602752	-0.00636494	0.0752873	0.0099071	0.0830546	0.156933	-0.0708682	0.238111	0.38627	-0.0197099	0.00330798	-0.0190416	-0.030456	0.0230042	-0.019326	-0.0533764	0.0187894	-0.0112008	-0.0197256	-0.00758399	-0.0361064	-0.00459669	-0.0117002	-0.0407459	0.00524467	0.0177014	0.00197311	0.00468088	-0.0174492	-0.0316504	0.21254	0.237343	0.246486	-0.0418411	-0.0458509	-0.0161106	-0.0221284	-0.0622327	-0.0297437	-0.0321636	-0.0508405	-0.126271
1402.07	42.6027	0.010119	-0.0599073	0.011214	-0.0303337	-0.0821061	0.00978446	0.0711232	0.00260059	0.0986922	0.00850704	0.0853261	0.156864	-0.0693697	0.242448	0.425316	-0.00753199	0.0138226	-0.0116797	-0.0299348	0.0240583	-0.0198612	-0.0510868	0.0181745	-0.0118396	-0.0186529	-0.00792018	-0.0364402	-0.00255195	-0.011554	-0.0402641	0.0209606	0.0321041	0.0188961	0.00526848	-0.0180568	-0.0293054	0.257629	0.285518	0.300513	-0.0428878	-0.0455581	-0.0160565	-0.0229541	-0.0666968	-0.0293309	-0.0324226	-0.0492568	-0.124889
1405.32	42.6568	0.00637517	-0.0578391	0.0136881	-0.0331555	-0.0797893	0.00823847	0.0863896	0.0145036	0.127946	0.00712782	0.0874855	0.156502	-0.0679843	0.246673	0.46603	0.0080098	0.0271922	-0.00149704	-0.0292182	0.0250368	-0.0201809	-0.0487728	0.0175498	-0.0124561	-0.0175838	-0.008376	-0.0367829	-0.000619636	-0.0114365	-0.0397309	0.0405475	0.0504567	0.0399492	0.00604283	-0.0184443	-0.0268409	0.309466	0.340956	0.362112	-0.0440288	-0.0452168	-0.0159996	-0.0238462	-0.0709006	-0.0289031	-0.0325819	-0.0477159	-0.12334
1408.51	42.7109	0.0023287	-0.055602	0.016048	-0.0358495	-0.0772159	0.00668879	0.106895	0.0299922	0.163915	0.00578558	0.089533	0.155835	-0.0667271	0.25076	0.50831	0.0275661	0.0440489	0.0121455	-0.0282531	0.025995	-0.0202431	-0.0464621	0.0169137	-0.0130427	-0.0165233	-0.00895642	-0.0371412	0.00118682	-0.0113573	-0.0391517	0.0646463	0.0734324	0.0657818	0.00704789	-0.0185608	-0.0242366	0.368631	0.404256	0.431854	-0.0452458	-0.0448299	-0.0159503	-0.0247919	-0.0748286	-0.0284528	-0.0326441	-0.0462346	-0.121627
1411.65	42.765	-0.0019927	-0.0532165	0.0182774	-0.0384194	-0.0744123	0.00514921	0.133521	0.0497922	0.20748	0.00449604	0.0914713	0.154857	-0.065606	0.254684	0.552045	0.0518493	0.0650847	0.0299517	-0.0269759	0.027001	-0.019995	-0.0441777	0.0162604	-0.0135901	-0.0154784	-0.00966344	-0.0375185	0.00285447	-0.0113257	-0.0385319	0.0939269	0.10173	0.0970718	0.00833083	-0.0183506	-0.0214618	0.435679	0.475981	0.510273	-0.0465177	-0.0443984	-0.0159201	-0.0257783	-0.0784657	-0.0279735	-0.032616	-0.04483	-0.119758
1414.94	42.819	-0.0065539	-0.0507033	0.02036	-0.0408697	-0.0714081	0.00362835	0.167186	0.0747	0.259514	0.0032735	0.093306	0.153568	-0.0646224	0.258423	0.597121	0.0816226	0.0910422	0.0526806	-0.0253094	0.0281382	-0.0193688	-0.0419376	0.0155794	-0.0140887	-0.0144568	-0.0104954	-0.0379151	0.00437178	-0.0113522	-0.0378772	0.129083	0.136072	0.134515	0.00994361	-0.0177529	-0.0184743	0.511131	0.556648	0.597852	-0.0478219	-0.0439226	-0.0159194	-0.0267927	-0.081796	-0.0274603	-0.032509	-0.0435184	-0.117739
1418.22	42.8731	-0.0113128	-0.0480809	0.0222795	-0.0432056	-0.0682357	0.00212978	0.208833	0.105566	0.320866	0.00213065	0.0950458	0.151978	-0.0637726	0.261956	0.643418	0.117686	0.122702	0.0811326	-0.0231594	0.0295073	-0.018277	-0.0397546	0.0148562	-0.0145292	-0.0134657	-0.0114472	-0.038327	0.00572778	-0.0114473	-0.0371943	0.170807	0.177184	0.178807	0.011945	-0.0167024	-0.0152182	0.595462	0.646722	0.695016	-0.0491358	-0.0434015	-0.015956	-0.0278237	-0.0848023	-0.0269106	-0.0323385	-0.042315	-0.115577
1421.48	42.9272	-0.0162209	-0.0453659	0.0240201	-0.0454323	-0.064929	0.000652304	0.259408	0.143288	0.392341	0.00107868	0.0967018	0.150103	-0.0630475	0.265268	0.690818	0.160859	0.160867	0.116134	-0.0204089	0.0312316	-0.0166062	-0.0376373	0.0140738	-0.0149039	-0.0125101	-0.0125107	-0.0387475	0.0069114	-0.0116215	-0.0364899	0.219787	0.225782	0.230635	0.0144017	-0.0151289	-0.011623	0.689093	0.746598	0.802119	-0.0504385	-0.0428334	-0.0160338	-0.0288606	-0.0874677	-0.0263249	-0.0321238	-0.0412333	-0.113282
1424.73	42.9813	-0.0212251	-0.0425723	0.0255676	-0.0475548	-0.0615222	-0.000810123	0.319827	0.188785	0.474681	0.000127456	0.0982879	0.147967	-0.0624326	0.268347	0.739198	0.211965	0.206345	0.158522	-0.0169126	0.0334627	-0.0142119	-0.0355911	0.0132139	-0.0152059	-0.0115917	-0.0136742	-0.0391672	0.00791282	-0.0118838	-0.0357708	0.276691	0.282554	0.290655	0.0173891	-0.0129553	-0.00760194	0.792382	0.856602	0.919436	-0.0517138	-0.0422156	-0.0161528	-0.0298936	-0.0897751	-0.0257066	-0.0318867	-0.0402841	-0.11086
1428.06	43.0353	-0.0262689	-0.0397119	0.0269102	-0.0495786	-0.058049	-0.00226705	0.390978	0.242984	0.568549	-0.000713795	0.0998199	0.145604	-0.0619074	0.271188	0.788439	0.271812	0.259932	0.20912	-0.0124896	0.0363862	-0.0109123	-0.0336194	0.012259	-0.0154292	-0.0107086	-0.014923	-0.039575	0.00872495	-0.0122419	-0.0350431	0.342149	0.348152	0.359482	0.0209944	-0.0100955	-0.00305074	0.90562	0.976977	1.04716	-0.0529509	-0.0415453	-0.0163084	-0.0309141	-0.0917109	-0.0250614	-0.0316508	-0.0394745	-0.108319
1431.37	43.0894	-0.031295	-0.0367951	0.0280401	-0.0515099	-0.0545416	-0.0037308	0.473683	0.30679	0.674515	-0.0014355	0.101316	0.143052	-0.0614465	0.273795	0.838421	0.341173	0.322397	0.268731	-0.00691651	0.0402278	-0.0064817	-0.0317234	0.0111937	-0.0155687	-0.00985603	-0.0162405	-0.0399583	0.00934531	-0.012701	-0.0343124	0.416753	0.423169	0.437682	0.0253191	-0.00645094	0.00215372	1.02902	1.10789	1.18542	-0.0541449	-0.0408202	-0.0164926	-0.031915	-0.0932657	-0.0243959	-0.0314401	-0.0388082	-0.105667
1434.57	43.1435	-0.036246	-0.0338302	0.0289526	-0.053354	-0.0510308	-0.00521534	0.568686	0.381073	0.793042	-0.00202744	0.102796	0.140358	-0.0610196	0.276173	0.889028	0.420775	0.394464	0.338113	7.92061e-05	0.045258	-0.000644817	-0.0299017	0.0100071	-0.0156208	-0.0090278	-0.0176087	-0.0403027	0.00977686	-0.0132639	-0.0335836	0.501024	0.508138	0.525755	0.0304818	-0.00190762	0.00815525	1.16274	1.24941	1.33423	-0.0552963	-0.0400393	-0.0166941	-0.0328899	-0.0944351	-0.0237163	-0.0312781	-0.0382847	-0.102912
1437.68	43.1975	-0.0410657	-0.0308241	0.0296468	-0.0551147	-0.0475455	-0.00673508	0.676634	0.46664	0.924496	-0.00247821	0.104279	0.137569	-0.0605942	0.278335	0.94015	0.511276	0.476799	0.417968	0.00882389	0.051798	0.00692839	-0.0281507	0.00869366	-0.015584	-0.00821755	-0.0190093	-0.0405918	0.0100292	-0.0139311	-0.0328615	0.595425	0.603514	0.624129	0.0366211	0.00366628	0.015118	1.30682	1.40154	1.49355	-0.0564102	-0.0392035	-0.0169016	-0.0338327	-0.0952171	-0.0230278	-0.0311866	-0.0379013	-0.10006
1440.96	43.2516	-0.0457016	-0.0277822	0.0301234	-0.0567935	-0.0441125	-0.00830199	0.798066	0.564218	1.06911	-0.00277519	0.105785	0.134735	-0.0601366	0.280301	0.991679	0.613259	0.569999	0.508923	0.0197018	0.0602247	0.0166275	-0.0264643	0.0072532	-0.0154583	-0.00741984	-0.0204241	-0.0408074	0.0101184	-0.0146998	-0.0321503	0.700343	0.709668	0.733152	0.043896	0.0104229	0.0232261	1.46127	1.5642	1.66327	-0.057496	-0.0383159	-0.0171053	-0.0347372	-0.0956121	-0.0223352	-0.0311847	-0.0376528	-0.0971207
1444.32	43.3057	-0.0501066	-0.0247091	0.0303843	-0.058392	-0.0407562	-0.00992492	0.933398	0.674436	1.22702	-0.00290389	0.107332	0.131904	-0.0596137	0.28209	1.04351	0.727215	0.674575	0.611524	0.0331569	0.0709749	0.0289042	-0.0248358	0.00569067	-0.0152462	-0.00663058	-0.0218348	-0.0409295	0.010067	-0.0155642	-0.0314545	0.816087	0.826883	0.853087	0.0524887	0.0185361	0.0326825	1.62598	1.73722	1.84319	-0.0585674	-0.0373811	-0.0172984	-0.0355969	-0.0956206	-0.0216439	-0.0312881	-0.037532	-0.0941028
1447.51	43.3598	-0.054241	-0.0216101	0.0304317	-0.0599128	-0.0374977	-0.0116091	1.08294	0.797815	1.3982	-0.00284801	0.108938	0.129127	-0.0589946	0.283727	1.09556	0.85354	0.79095	0.726222	0.0496941	0.0845475	0.0442743	-0.0232594	0.00401469	-0.0149526	-0.00584733	-0.0232233	-0.0409374	0.00990354	-0.0165168	-0.0307796	0.942878	0.955349	0.98411	0.0626043	0.0282031	0.0437082	1.80081	1.92038	2.03305	-0.0596416	-0.0364056	-0.0174775	-0.0364049	-0.0952459	-0.0209586	-0.0315096	-0.0375304	-0.0910155
1450.57	43.4138	-0.0580735	-0.018492	0.0302676	-0.0613605	-0.034355	-0.0133567	1.24685	0.934749	1.58258	-0.00258961	0.11062	0.126451	-0.0582519	0.285236	1.14773	0.992525	0.919447	0.853368	0.0698779	0.101505	0.0633157	-0.0217315	0.00223632	-0.0145849	-0.00506872	-0.0245721	-0.0408106	0.00965994	-0.0175482	-0.0301321	1.08086	1.09517	1.12631	0.0744719	0.0396442	0.0565421	1.98553	2.11337	2.23253	-0.0607382	-0.0353964	-0.0176424	-0.0371537	-0.0944946	-0.0202841	-0.0318587	-0.0376359	-0.0878682
1453.83	43.4679	-0.0615806	-0.0153638	0.029893	-0.0627416	-0.0313434	-0.0151666	1.42517	1.08552	1.77993	-0.00210975	0.112393	0.123924	-0.0573634	0.286639	1.19994	1.14436	1.06029	0.993211	0.0943295	0.122469	0.0866634	-0.0202524	0.000368011	-0.0141516	-0.00429437	-0.0258655	-0.0405303	0.00936994	-0.0186459	-0.0295195	1.23007	1.24635	1.27968	0.0883439	0.0531051	0.0714414	2.17986	2.31585	2.44126	-0.0618767	-0.0343616	-0.0177946	-0.0378355	-0.0933783	-0.0196246	-0.0323405	-0.0378346	-0.0846693
1457.21	43.522	-0.0647451	-0.0122363	0.029309	-0.0640648	-0.0284768	-0.0170359	1.61783	1.25028	1.98995	-0.00138808	0.11427	0.121588	-0.056313	0.287959	1.25211	1.30912	1.21359	1.14589	0.123722	0.148117	0.115003	-0.0188263	-0.00157645	-0.0136602	-0.00352416	-0.0270911	-0.0400806	0.00906752	-0.0197929	-0.0289498	1.39051	1.40882	1.44415	0.104494	0.0688558	0.0886816	2.38347	2.52741	2.65882	-0.0630732	-0.0333097	-0.0179373	-0.0384433	-0.0919127	-0.0189848	-0.0329544	-0.0381113	-0.0814264
1460.53	43.5761	-0.0675562	-0.00912113	0.0285167	-0.0653392	-0.0257686	-0.0189607	1.8246	1.42905	2.21225	-0.000401812	0.116262	0.119483	-0.05509	0.289214	1.30417	1.48678	1.37938	1.31146	0.158771	0.17917	0.149057	-0.0174605	-0.00358174	-0.0131162	-0.00275854	-0.0282403	-0.0394512	0.00878387	-0.0209684	-0.0284309	1.56205	1.58241	1.61955	0.123217	0.0871911	0.108557	2.59597	2.74763	2.88474	-0.0643379	-0.0322493	-0.0180748	-0.0389719	-0.0901195	-0.0183693	-0.0336929	-0.0384505	-0.0781458
1463.73	43.6301	-0.0700088	-0.00603044	0.0275188	-0.0665739	-0.0232316	-0.0209367	2.04517	1.62171	2.44633	0.00087568	0.118376	0.117644	-0.0536885	0.290419	1.35606	1.67721	1.55756	1.48985	0.200221	0.216383	0.189577	-0.0161637	-0.00563086	-0.0125226	-0.00199958	-0.0293078	-0.038638	0.00854618	-0.0221492	-0.0279709	1.74452	1.76688	1.80564	0.144821	0.108428	0.131376	2.81693	2.97603	3.11855	-0.065672	-0.0311898	-0.0182127	-0.0394188	-0.0880239	-0.0177833	-0.0345418	-0.0388371	-0.074834
1466.97	43.6842	-0.0721026	-0.00297681	0.0263206	-0.0677756	-0.0208769	-0.0229578	2.27909	1.82804	2.69166	0.00247557	0.120621	0.116098	-0.0521067	0.291586	1.40772	1.88019	1.74797	1.68091	0.248836	0.260523	0.237324	-0.0149436	-0.00770534	-0.0118797	-0.00125211	-0.0302904	-0.0376441	0.00837775	-0.0233129	-0.0275764	1.93764	1.96194	2.00211	0.169628	0.132901	0.157463	3.04589	3.21211	3.35972	-0.0670668	-0.0301409	-0.0183577	-0.0397837	-0.0856551	-0.0172322	-0.035482	-0.0392565	-0.0714974
1470.2	43.7383	-0.0738425	2.62458e-05	0.0249316	-0.0689474	-0.0187149	-0.0250153	2.52585	2.04768	2.94759	0.00443406	0.123004	0.11487	-0.0503464	0.292719	1.4591	2.0954	1.95033	1.88438	0.305374	0.312354	0.293045	-0.0138045	-0.00978645	-0.0111857	-0.000523567	-0.0311865	-0.0364777	0.00829697	-0.0244396	-0.0272521	2.14109	2.16719	2.20857	0.197969	0.160959	0.187148	3.28236	3.45536	3.60773	-0.0685044	-0.0291139	-0.0185171	-0.0400676	-0.0830429	-0.016722	-0.0364912	-0.0396954	-0.0681427
1473.43	43.7924	-0.0752379	0.00296583	0.0233646	-0.0700884	-0.016754	-0.0270971	2.78483	2.2802	3.21345	0.00679251	0.125531	0.113976	-0.0484131	0.29382	1.51013	2.32241	2.16429	2.09992	0.370575	0.372612	0.357459	-0.0127468	-0.0118573	-0.0104379	0.000176509	-0.031995	-0.0351508	0.0083175	-0.0255133	-0.0270007	2.35448	2.38221	2.42459	0.230179	0.192956	0.220766	3.52582	3.70526	3.86203	-0.06996	-0.0281209	-0.0186987	-0.0402717	-0.0802172	-0.0162596	-0.0375462	-0.0401414	-0.064777
1476.62	43.8464	-0.076303	0.00583051	0.0216337	-0.0711933	-0.0150008	-0.0291875	3.05533	2.52503	3.48849	0.00959741	0.128211	0.113428	-0.046317	0.294883	1.56078	2.56076	2.38944	2.32711	0.445141	0.441985	0.431236	-0.0117684	-0.0139039	-0.00963328	0.000837201	-0.0327154	-0.0336775	0.00844824	-0.0265225	-0.0268209	2.57734	2.60652	2.6497	0.26659	0.229245	0.25865	3.77574	3.96127	4.12208	-0.0714051	-0.0271749	-0.0189107	-0.0403965	-0.0772058	-0.0158527	-0.0386244	-0.0405835	-0.0614074
1479.89	43.9005	-0.0770555	0.00861068	0.0197532	-0.0722541	-0.0134592	-0.0312675	3.33659	2.78156	3.77195	0.0129004	0.131052	0.113232	-0.044072	0.295897	1.61098	2.80989	2.62527	2.56545	0.529721	0.521104	0.514976	-0.0108661	-0.0159163	-0.00876939	0.00144724	-0.033348	-0.0320751	0.00869221	-0.0274591	-0.0267063	2.80918	2.83961	2.88335	0.30753	0.27017	0.301127	4.03156	4.22287	4.38732	-0.0728098	-0.0262876	-0.0191614	-0.0404423	-0.074034	-0.0155102	-0.0397048	-0.0410108	-0.0580408
1483.21	43.9546	-0.0775173	0.0112981	0.0177366	-0.0732605	-0.0121302	-0.0333176	3.6278	3.04906	4.063	0.0167592	0.134064	0.113383	-0.041695	0.296847	1.6607	3.06917	2.87123	2.81435	0.624897	0.610527	0.609204	-0.0100382	-0.0178892	-0.00784418	0.00199581	-0.0338946	-0.030365	0.00904597	-0.028318	-0.0266447	3.04946	3.08092	3.12498	0.353315	0.316064	0.348512	4.29275	4.48953	4.65721	-0.0741461	-0.0254677	-0.0194582	-0.0404095	-0.0707246	-0.0152405	-0.0407691	-0.0414119	-0.0546834
1486.47	44.0087	-0.0777139	0.0138852	0.0155967	-0.0742015	-0.011012	-0.0353192	3.92809	3.32675	4.36084	0.0212383	0.137255	0.113876	-0.0392051	0.297713	1.70988	3.33796	3.1267	3.07321	0.731175	0.71073	0.714353	-0.00928488	-0.0198202	-0.00685615	0.00247296	-0.0343586	-0.028573	0.00949956	-0.0290957	-0.0266202	3.2976	3.32986	3.37399	0.404243	0.367239	0.401105	4.55874	4.76073	4.93119	-0.0753888	-0.0247194	-0.0198077	-0.0402977	-0.0672997	-0.0150514	-0.0418013	-0.0417748	-0.0513414
1489.65	44.0627	-0.077673	0.016365	0.0133458	-0.0750633	-0.0101007	-0.0372563	4.23657	3.61382	4.6646	0.0264107	0.140632	0.1147	-0.0366235	0.298475	1.75847	3.61554	3.39104	3.34134	0.848974	0.822101	0.830759	-0.0086076	-0.0217083	-0.00580377	0.00286885	-0.0347458	-0.0267294	0.0100365	-0.0297887	-0.0266154	3.55301	3.58584	3.62977	0.460592	0.423983	0.459182	4.82901	5.03596	5.20873	-0.0765159	-0.0240406	-0.0202154	-0.0401067	-0.0637829	-0.0149489	-0.0427861	-0.0420874	-0.0480206
1492.88	44.1168	-0.0774234	0.0187306	0.0109961	-0.075828	-0.00938814	-0.0391161	4.55234	3.90939	4.97345	0.0323575	0.144205	0.115841	-0.0339728	0.299114	1.80641	3.90117	3.66354	3.61803	0.978623	0.944934	0.958656	-0.00800722	-0.0235517	-0.00468739	0.00317372	-0.0350645	-0.0248676	0.0106351	-0.0303935	-0.0266145	3.81506	3.84823	3.89169	0.522615	0.486558	0.52299	5.10303	5.3147	5.48932	-0.0775083	-0.023424	-0.0206855	-0.0398365	-0.0601982	-0.0149355	-0.0437094	-0.0423399	-0.0447275
1496.1	44.1709	-0.0769935	0.0209763	0.00856182	-0.0764731	-0.00886243	-0.0408891	4.87444	4.21257	5.28655	0.0391679	0.147985	0.117289	-0.031277	0.299611	1.85364	4.19408	3.94347	3.90254	1.12035	1.07942	1.09818	-0.00748298	-0.0253459	-0.00350889	0.00337709	-0.0353251	-0.0230207	0.0112693	-0.0309066	-0.0266047	4.08312	4.11641	4.15911	0.590533	0.555195	0.592743	5.38027	5.59646	5.77246	-0.0783497	-0.0228584	-0.0212219	-0.0394884	-0.0565667	-0.0150105	-0.044557	-0.042528	-0.0414684
1499.38	44.2249	-0.0764106	0.0230973	0.00605851	-0.0769709	-0.00850756	-0.0425678	5.20194	4.52246	5.60305	0.0469384	0.151985	0.119034	-0.0285617	0.299949	1.90011	4.4935	4.2301	4.19411	1.27428	1.22564	1.24936	-0.00703216	-0.0270833	-0.00227199	0.00346814	-0.0355385	-0.0212194	0.0119093	-0.0313248	-0.0265765	4.3566	4.38974	4.43141	0.664533	0.630088	0.668614	5.66025	5.88077	6.05768	-0.0790274	-0.0223308	-0.0218283	-0.0390658	-0.0529053	-0.0151708	-0.0453152	-0.042654	-0.0382494
1502.7	44.279	-0.0757001	0.0250893	0.00350247	-0.077291	-0.00830436	-0.0441462	5.53393	4.83813	5.92215	0.0557716	0.156221	0.121072	-0.025854	0.300112	1.94573	4.79864	4.52267	4.49196	1.44045	1.38358	1.41215	-0.0066507	-0.028754	-0.000982309	0.00343594	-0.0357146	-0.0194897	0.0125225	-0.0316458	-0.0265242	4.63483	4.6676	4.70797	0.744763	0.711394	0.75073	5.94248	6.16714	6.34454	-0.0795333	-0.0218281	-0.0225084	-0.0385746	-0.0492242	-0.0154128	-0.045971	-0.0427275	-0.0350767
1506.01	44.3331	-0.0748856	0.0269501	0.00090975	-0.0774023	-0.00823198	-0.0456188	5.86949	5.15866	6.24305	0.0657753	0.160713	0.123408	-0.0231827	0.300087	1.99045	5.10871	4.82041	4.79533	1.61876	1.55314	1.58639	-0.00633499	-0.0303471	0.000351326	0.00326988	-0.0358617	-0.017851	0.0130745	-0.0318684	-0.0264464	4.91723	4.94936	4.98818	0.831331	0.799225	0.839172	6.22651	6.45513	6.63261	-0.0798641	-0.0213383	-0.0232654	-0.0380226	-0.0455282	-0.0157343	-0.0465126	-0.0427635	-0.0319567
1509.21	44.3872	-0.0739886	0.0286788	-0.00170513	-0.0772743	-0.00826909	-0.0469797	6.20773	5.48313	6.56498	0.0770604	0.165487	0.126056	-0.0205782	0.299863	2.03417	5.42296	5.12257	5.10344	1.80906	1.7341	1.77185	-0.00608296	-0.0318518	0.0017159	0.00296067	-0.0359855	-0.0163155	0.0135294	-0.0319925	-0.0263454	5.20318	5.23442	5.27147	0.924302	0.893648	0.933969	6.5119	6.7443	6.92149	-0.0800218	-0.0208522	-0.0241001	-0.0374203	-0.0418175	-0.0161354	-0.0469297	-0.0427802	-0.0288959
1512.44	44.4412	-0.0730282	0.0302754	-0.00433006	-0.0768793	-0.00839422	-0.0482219	6.5478	5.81064	6.8872	0.0897401	0.170573	0.129043	-0.0180722	0.299431	2.07683	5.74062	5.42842	5.41553	2.01108	1.92619	1.96823	-0.00589569	-0.0332583	0.0030944	0.00250163	-0.0360897	-0.0148892	0.0138508	-0.0320189	-0.0262259	5.49212	5.52218	5.55726	1.02369	0.994684	1.0351	6.79825	7.03424	7.21079	-0.0800123	-0.0203631	-0.0250104	-0.0367802	-0.0380904	-0.0166196	-0.0472125	-0.0427973	-0.0259004
1515.64	44.4953	-0.0720197	0.0317402	-0.00695657	-0.0761939	-0.00858581	-0.0493379	6.88888	6.14031	7.20901	0.103928	0.17601	0.132406	-0.0156967	0.298783	2.11833	6.06096	5.73722	5.73083	2.22447	2.12905	2.17516	-0.00577888	-0.0345581	0.00446678	0.00188938	-0.036176	-0.0135729	0.0140028	-0.0319485	-0.0260948	5.78349	5.8121	5.84504	1.12949	1.10231	1.14251	7.08516	7.32454	7.50015	-0.0798433	-0.0198678	-0.0259906	-0.0361169	-0.0343454	-0.0171932	-0.0473527	-0.042834	-0.0229757
1518.88	44.5494	-0.070972	0.0330732	-0.00958015	-0.0752008	-0.00882368	-0.0503205	7.23017	6.4713	7.52975	0.119739	0.181846	0.136196	-0.0134818	0.297917	2.15857	6.38327	6.04827	6.04863	2.4488	2.34229	2.39224	-0.00574301	-0.0357444	0.00581226	0.00112422	-0.0362443	-0.0123639	0.0139519	-0.0317825	-0.0259598	6.07676	6.10361	6.13429	1.24161	1.21645	1.2561	7.37226	7.61483	7.78921	-0.0795227	-0.019365	-0.0270309	-0.0354467	-0.0305835	-0.0178636	-0.0473429	-0.0429071	-0.0201257
1522.11	44.6035	-0.0698876	0.0342749	-0.0121987	-0.073888	-0.00908955	-0.0511636	7.57094	6.8028	7.84882	0.137285	0.188137	0.140473	-0.0114554	0.296833	2.19748	6.70688	6.3609	6.36822	2.68361	2.56544	2.61901	-0.0058025	-0.0368114	0.00711174	0.000209982	-0.0362928	-0.0112582	0.0136685	-0.0315227	-0.0258288	6.37143	6.39621	6.42453	1.35997	1.337	1.37571	7.6592	7.90474	8.07761	-0.0790555	-0.0188553	-0.0281168	-0.0347872	-0.026812	-0.0186374	-0.0471773	-0.0430289	-0.0173532
1525.37	44.6575	-0.0687614	0.035346	-0.0148111	-0.0722478	-0.00936883	-0.051862	7.91049	7.13403	8.16565	0.156677	0.194952	0.145314	-0.00964022	0.295535	2.23494	7.03113	6.67444	6.68893	2.92833	2.79802	2.85496	-0.00597429	-0.0377541	0.0083497	-0.000845907	-0.0363175	-0.010251	0.0131293	-0.0311722	-0.0257074	6.66702	6.68941	6.71529	1.4844	1.46381	1.50119	7.94562	8.19392	8.36503	-0.0784437	-0.0183397	-0.0292294	-0.0341558	-0.0230474	-0.0195176	-0.046852	-0.0432065	-0.0146605
1528.59	44.7116	-0.0675823	0.0362885	-0.0174151	-0.0702755	-0.00965166	-0.0524116	8.24818	7.46427	8.4797	0.17802	0.202372	0.150811	-0.00805442	0.294032	2.27086	7.35541	6.9883	7.01012	3.18238	3.0395	3.09956	-0.00627541	-0.038568	0.00951463	-0.00203201	-0.0363138	-0.00933719	0.0123182	-0.0307356	-0.0255991	6.96305	6.98275	7.00615	1.61473	1.59669	1.63232	8.2312	8.48203	8.65114	-0.0776864	-0.0178199	-0.0303478	-0.0335663	-0.0193143	-0.0205026	-0.0463676	-0.0434425	-0.0120499
1531.88	44.7657	-0.0663342	0.0371058	-0.0200055	-0.0679689	-0.0099339	-0.0528095	8.58338	7.79283	8.79048	0.201415	0.210493	0.157068	-0.0067108	0.292335	2.30514	7.67914	7.30188	7.33119	3.44511	3.28932	3.35226	-0.0067211	-0.0392502	0.0105991	-0.00333411	-0.0362757	-0.00851028	0.0112272	-0.0302182	-0.0255052	7.25911	7.27578	7.29667	1.75074	1.73541	1.76889	8.51558	8.76872	8.93559	-0.0767822	-0.0172977	-0.0314517	-0.0330276	-0.0156421	-0.0215853	-0.0457298	-0.0437361	-0.00952467
1535.2	44.8198	-0.064997	0.0378033	-0.0225754	-0.0653305	-0.0102173	-0.0530537	8.91555	8.11908	9.09754	0.226954	0.219424	0.164205	-0.00561758	0.290459	2.33768	8.00175	7.61465	7.65156	3.71585	3.5469	3.61245	-0.00732394	-0.0398001	0.0115981	-0.00473575	-0.0361967	-0.00776172	0.00985666	-0.029627	-0.0254243	7.55476	7.5681	7.58645	1.89218	1.87972	1.91063	8.79843	9.05366	9.21805	-0.0757316	-0.0167757	-0.0325239	-0.0325422	-0.012062	-0.0227535	-0.044951	-0.0440846	-0.00708784
1538.52	44.8738	-0.0635482	0.0383865	-0.0251162	-0.0623697	-0.0105094	-0.0531435	9.24415	8.44244	9.40047	0.25472	0.229287	0.172351	-0.004778	0.288422	2.36837	8.32275	7.92608	7.9707	3.99388	3.81164	3.87952	-0.00809398	-0.0402196	0.0125086	-0.00621992	-0.0360702	-0.00708097	0.00821449	-0.0289707	-0.0253523	7.8496	7.85929	7.87512	2.03879	2.02933	2.05728	9.07941	9.3365	9.49816	-0.0745375	-0.0162561	-0.0335524	-0.0321075	-0.00860743	-0.0239908	-0.0440496	-0.0444827	-0.00474182
1541.76	44.9279	-0.0619638	0.0388604	-0.0276194	-0.0591025	-0.0108223	-0.0530796	9.5687	8.76237	9.69885	0.284782	0.240218	0.181646	-0.00418955	0.286242	2.39713	8.64163	8.2357	8.28809	4.27847	4.08293	4.15285	-0.00903903	-0.040514	0.01333	-0.00776934	-0.0358896	-0.00645665	0.00631597	-0.0282609	-0.0252817	8.14323	8.149	8.16229	2.19027	2.18393	2.20855	9.35816	9.61689	9.77559	-0.0732054	-0.0157394	-0.0345308	-0.0317157	-0.00531255	-0.0252787	-0.0430497	-0.0449225	-0.00248911
1544.97	44.982	-0.0602197	0.0392285	-0.0300776	-0.0555508	-0.0111725	-0.052865	9.88875	9.07838	9.99232	0.317197	0.252362	0.192238	-0.0038438	0.283941	2.42386	8.95794	8.54306	8.60327	4.5689	4.36014	4.4318	-0.0101642	-0.0406921	0.0140649	-0.00936737	-0.0356497	-0.00587777	0.0041841	-0.027511	-0.0252034	8.43525	8.43685	8.4476	2.34632	2.3432	2.36415	9.63434	9.89447	10.0499	-0.0717434	-0.015223	-0.0354575	-0.0313542	-0.00221263	-0.0265984	-0.0419788	-0.0453936	-0.000331844
1548.18	45.036	-0.0582937	0.0394927	-0.0324849	-0.051742	-0.0115804	-0.0525077	10.2039	9.39002	10.2805	0.352002	0.265873	0.204276	-0.00372749	0.281543	2.44848	9.27123	8.84771	8.91576	4.86442	4.64264	4.71573	-0.0114715	-0.0407655	0.014721	-0.0109984	-0.035347	-0.00533593	0.00184876	-0.0267346	-0.0251079	8.72528	8.72249	8.73069	2.50662	2.50679	2.52378	9.9076	10.1689	10.3208	-0.0701606	-0.0146997	-0.0363344	-0.0310062	0.000657592	-0.0279313	-0.0408656	-0.0458837	0.00172729
1551.4	45.0901	-0.0561668	0.0396534	-0.0348368	-0.0477067	-0.0120688	-0.0520206	10.5136	9.69688	10.5631	0.389224	0.28091	0.217916	-0.00382256	0.279078	2.47091	9.58107	9.14925	9.22514	5.1643	4.92983	5.004	-0.0129589	-0.0407473	0.0153106	-0.0126489	-0.034979	-0.00482567	-0.000653319	-0.0259455	-0.0249876	9.01294	9.00557	9.01118	2.67085	2.67437	2.68713	10.1776	10.4396	10.5878	-0.0684671	-0.0141585	-0.0371653	-0.030652	0.00326427	-0.0292583	-0.0397383	-0.0463797	0.00368495
1554.5	45.1442	-0.053825	0.0397085	-0.0371288	-0.0434791	-0.0126606	-0.0514224	10.8177	9.99855	10.8397	0.428868	0.297634	0.233313	-0.00410685	0.276579	2.49107	9.88701	9.44725	9.53099	5.4678	5.22109	5.29599	-0.0146188	-0.0406509	0.0158503	-0.0143064	-0.0345439	-0.00434376	-0.00327955	-0.0251567	-0.0248371	9.29781	9.28571	9.2887	2.83867	2.84559	2.85387	10.4438	10.7064	10.8505	-0.066673	-0.013586	-0.0379545	-0.0302707	0.00557639	-0.0305596	-0.0386245	-0.0468696	0.00553591
1557.66	45.1983	-0.0512604	0.0396534	-0.0393546	-0.0390958	-0.0133783	-0.0507356	11.1156	10.2947	11.1099	0.470926	0.316205	0.250621	-0.00455497	0.274082	2.50892	10.1886	9.74132	9.83287	5.77423	5.51581	5.59106	-0.016437	-0.0404886	0.0163597	-0.0159604	-0.0340403	-0.00388814	-0.00598315	-0.0243794	-0.0246544	9.57952	9.56255	9.56288	3.00976	3.02009	3.02371	10.706	10.9687	11.1085	-0.0647888	-0.0129689	-0.0387068	-0.0298423	0.00756716	-0.0318136	-0.0375507	-0.0473441	0.00727413
1561.05	45.2523	-0.0484711	0.0394796	-0.0415064	-0.034596	-0.0142432	-0.0499853	11.4069	10.5849	11.3734	0.515371	0.336778	0.269993	-0.00513959	0.271628	2.5244	10.4855	10.0311	10.1304	6.08289	5.8134	5.88861	-0.0183926	-0.040271	0.0168598	-0.0176013	-0.0334673	-0.00345653	-0.00871594	-0.0236239	-0.0244407	9.85763	9.8357	9.83329	3.18377	3.19754	3.19632	10.9637	11.226	11.3612	-0.0628257	-0.0122956	-0.0394261	-0.0293501	0.00921485	-0.0329986	-0.0365413	-0.0477973	0.00889318
1564.43	45.3064	-0.0454608	0.0391753	-0.0435762	-0.0300206	-0.0152753	-0.0491972	11.6912	10.869	11.6298	0.562161	0.3595	0.291577	-0.00583309	0.269258	2.53748	10.7772	10.316	10.4231	6.39312	6.11329	6.18805	-0.0204595	-0.0400072	0.017371	-0.0192192	-0.0328235	-0.00304436	-0.0114312	-0.0228987	-0.0242028	10.1317	10.1047	10.0995	3.36038	3.37761	3.37138	11.2163	11.4778	11.6082	-0.060796	-0.0115576	-0.0401155	-0.0287813	0.0105035	-0.0340941	-0.0356189	-0.0482274	0.0103864
1567.62	45.3605	-0.0422391	0.0387266	-0.0455557	-0.0254115	-0.0164934	-0.048395	11.9682	11.1464	11.8786	0.611235	0.384506	0.315514	-0.00660983	0.267014	2.54814	11.0632	10.5958	10.7106	6.70428	6.4149	6.4888	-0.022608	-0.0397039	0.0179104	-0.0208035	-0.0321082	-0.00264409	-0.014086	-0.0222101	-0.0239512	10.4014	10.3692	10.3612	3.53926	3.55996	3.54859	11.4636	11.7237	11.849	-0.0587138	-0.0107494	-0.0407752	-0.0281275	0.0114228	-0.0350827	-0.0348026	-0.0486366	0.0117472
1570.82	45.4146	-0.0388197	0.0381179	-0.0474384	-0.0208112	-0.017914	-0.0475998	12.2373	11.4169	12.1195	0.662518	0.411921	0.341934	-0.00744771	0.264939	2.55639	11.3431	10.87	10.9925	7.01575	6.71769	6.79033	-0.0248074	-0.0393652	0.0184914	-0.022342	-0.0313206	-0.0022463	-0.0166437	-0.021562	-0.0236996	10.6661	10.6287	10.6178	3.7201	3.74428	3.72765	11.7048	11.963	12.0829	-0.0565947	-0.00986861	-0.0414038	-0.0273851	0.0119678	-0.0359509	-0.0341075	-0.0490295	0.0129698
1573.99	45.4686	-0.0352206	0.0373314	-0.0492197	-0.0162615	-0.0195499	-0.0468288	12.4981	11.6801	12.3518	0.715922	0.441852	0.370953	-0.00832931	0.263071	2.56222	11.6163	11.1381	11.2683	7.32695	7.02112	7.0921	-0.0270289	-0.0389931	0.0191219	-0.0238197	-0.0304598	-0.00184116	-0.0190752	-0.0209557	-0.0234642	10.9255	10.8827	10.8688	3.90259	3.93028	3.90827	11.9395	12.1951	12.3096	-0.0544551	-0.00891554	-0.0419977	-0.0265541	0.0121398	-0.0366893	-0.0335459	-0.0494113	0.0140496
1577.2	45.5227	-0.0314623	0.0363478	-0.0508981	-0.0118039	-0.0214094	-0.0460942	12.7501	11.9356	12.5751	0.771346	0.474389	0.402672	-0.00924253	0.261446	2.56568	11.8824	11.3997	11.5374	7.63734	7.3247	7.39362	-0.0292483	-0.0385869	0.0198048	-0.0252205	-0.0295235	-0.00141933	-0.0213584	-0.0203904	-0.0232623	11.179	11.1306	11.1138	4.08644	4.11764	4.09015	12.1672	12.4196	12.5283	-0.0523107	-0.00789213	-0.0425515	-0.0256378	0.0119451	-0.0372928	-0.0331252	-0.049786	0.0149827
1580.54	45.5768	-0.0275673	0.035148	-0.0524743	-0.00747707	-0.0234965	-0.0454044	12.9927	12.1829	12.7888	0.828676	0.509601	0.437169	-0.0101814	0.260095	2.56682	12.1408	11.6541	11.7995	7.94639	7.62792	7.69443	-0.0314466	-0.0381438	0.0205383	-0.0265285	-0.0285093	-0.000973893	-0.0234773	-0.0198638	-0.0231113	11.4261	11.372	11.3522	4.27136	4.30609	4.27305	12.3873	12.6359	12.7386	-0.0501752	-0.00680143	-0.0430575	-0.0246424	0.0113928	-0.0377592	-0.032848	-0.0501537	0.0157673
1583.89	45.6309	-0.0235595	0.0337154	-0.0539509	-0.00331355	-0.0258102	-0.0447639	13.2253	12.4216	12.9924	0.887785	0.547535	0.474499	-0.0111453	0.25904	2.56569	12.3909	11.901	12.0539	8.25364	7.93032	7.99407	-0.03361	-0.0376597	0.0213169	-0.027729	-0.0274148	-0.00050091	-0.0254206	-0.0193729	-0.0230257	11.6663	11.6062	11.5835	4.45709	4.49535	4.45669	12.5991	12.8433	12.9398	-0.0480581	-0.00564639	-0.0435063	-0.0235759	0.0104927	-0.0380882	-0.0327116	-0.05051	0.0164032
1587.08	45.6849	-0.0194644	0.032038	-0.0553283	0.00066303	-0.0283451	-0.0441722	13.4474	12.6512	13.1853	0.948539	0.588213	0.514692	-0.0121376	0.2583	2.56239	12.6322	12.1398	12.3002	8.55861	8.23144	8.29212	-0.0357279	-0.0371294	0.0221325	-0.0288087	-0.0262386	1.66694e-07	-0.0271805	-0.0189136	-0.0230167	11.8989	11.8328	11.807	4.64337	4.68515	4.64083	12.8021	13.0413	13.1314	-0.0459639	-0.0044291	-0.0438879	-0.0224468	0.00925468	-0.0382802	-0.0327082	-0.0508467	0.0168923
1590.28	45.739	-0.0153089	0.030108	-0.0566048	0.00443781	-0.0310912	-0.043624	13.6583	12.8712	13.3667	1.0108	0.63163	0.557754	-0.0131643	0.257888	2.55701	12.864	12.3698	12.5376	8.86087	8.53085	8.58814	-0.0377925	-0.0365481	0.0229751	-0.0297571	-0.024981	0.000527305	-0.0287505	-0.0184813	-0.0230903	12.1236	12.051	12.0224	4.82994	4.87525	4.82522	12.9957	13.2292	13.3127	-0.0438929	-0.00315088	-0.0441925	-0.021263	0.00769147	-0.0383344	-0.0328252	-0.0511545	0.0172376
1593.37	45.7931	-0.0111195	0.0279239	-0.0577748	0.0080014	-0.0340337	-0.0431095	13.8574	13.0809	13.5362	1.07441	0.67776	0.603662	-0.014233	0.257812	2.54967	13.0858	12.5905	12.7657	9.16002	8.8281	8.88172	-0.0397979	-0.0359114	0.0238309	-0.0305664	-0.0236428	0.00107602	-0.0301263	-0.018071	-0.0232478	12.3395	12.2603	12.2288	5.01655	5.06538	5.00965	13.1793	13.4066	13.4833	-0.0418426	-0.00181324	-0.0444116	-0.0200305	0.00581851	-0.0382486	-0.0330463	-0.0514239	0.0174427
1596.48	45.8472	-0.00692133	0.0254907	-0.0588299	0.0113465	-0.0371532	-0.0426149	14.044	13.2798	13.6929	1.13922	0.726552	0.65237	-0.0153531	0.258072	2.5405	13.2968	12.8013	12.9837	9.45563	9.12277	9.17245	-0.0417404	-0.0352164	0.0246823	-0.0312311	-0.0222253	0.0016407	-0.0313069	-0.0176775	-0.0234859	12.5462	12.4601	12.4258	5.20297	5.25531	5.19386	13.3523	13.573	13.6426	-0.0398086	-0.000418098	-0.0445386	-0.0187533	0.00365387	-0.0380188	-0.0333525	-0.0516463	0.0175119
1599.92	45.9012	-0.0027356	0.0228197	-0.0597598	0.014467	-0.0404258	-0.0421227	14.2174	13.4672	13.8363	1.20507	0.777934	0.703809	-0.0165345	0.258663	2.52962	13.4964	13.0015	13.1911	9.74731	9.41442	9.45994	-0.0436195	-0.0344618	0.0255082	-0.0317482	-0.0207302	0.00221478	-0.032295	-0.017297	-0.0237969	12.7431	12.6497	12.6127	5.38895	5.44477	5.37766	13.5142	13.7277	13.79	-0.0377856	0.00103349	-0.0445692	-0.0174336	0.00121824	-0.0376405	-0.0337232	-0.0518135	0.0174498
1603.35	45.9553	0.00142112	0.019929	-0.0605538	0.0173576	-0.0438234	-0.0416134	14.377	13.6425	13.9657	1.27182	0.831814	0.75788	-0.0177867	0.259574	2.5172	13.684	13.1905	13.3871	10.0347	9.70262	9.74376	-0.0454366	-0.0336507	0.0262864	-0.0321171	-0.0191605	0.00279062	-0.0330962	-0.0169276	-0.0241697	12.9294	12.8286	12.7888	5.57425	5.63353	5.56081	13.6644	13.8703	13.9251	-0.0357676	0.00254203	-0.0445015	-0.0160716	-0.00146415	-0.0371102	-0.0341372	-0.0519172	0.0172618
1606.63	46.0094	0.00553649	0.0168422	-0.0611998	0.0200141	-0.0473152	-0.0410679	14.522	13.805	14.0805	1.33929	0.888086	0.814463	-0.0191203	0.260786	2.50338	13.8589	13.3677	13.5712	10.3173	9.98692	10.0235	-0.0471952	-0.0327889	0.0269964	-0.0323393	-0.0175216	0.00335891	-0.033719	-0.0165696	-0.0245903	13.1047	12.9961	12.9537	5.75865	5.82135	5.74309	13.8024	14.0003	14.0474	-0.033747	0.00411005	-0.0443365	-0.0146658	-0.0043659	-0.0364275	-0.0345725	-0.0519491	0.0169546
1609.92	46.0634	0.00960069	0.0135893	-0.0616864	0.0224351	-0.0508672	-0.0404691	14.6518	13.9542	14.18	1.40733	0.946625	0.873414	-0.0205451	0.262276	2.48831	14.0205	13.5324	13.7426	10.5948	10.2669	10.2987	-0.0488996	-0.0318863	0.0276218	-0.0324188	-0.0158195	0.00390896	-0.0341722	-0.0162256	-0.0250422	13.2683	13.1517	13.1067	5.94189	6.00795	5.92427	13.9277	14.1174	14.1565	-0.0317141	0.00574123	-0.0440773	-0.0132134	-0.00745645	-0.0355943	-0.0350069	-0.0519005	0.0165365
1613.01	46.1175	0.013604	0.0102053	-0.0620015	0.0246217	-0.0544427	-0.0398029	14.7658	14.0892	14.2637	1.47579	1.00729	0.93457	-0.0220691	0.26402	2.47215	14.1682	13.684	13.9007	10.8668	10.542	10.569	-0.0505524	-0.0309552	0.0281505	-0.0323618	-0.0140613	0.00442863	-0.0344646	-0.0158997	-0.0255079	13.4196	13.2948	13.2473	6.12373	6.1931	6.10412	14.04	14.2213	14.2521	-0.0296578	0.00744009	-0.0437286	-0.0117099	-0.0107034	-0.0346155	-0.0354194	-0.0517628	0.0160168
1616.11	46.1716	0.0175342	0.00672908	-0.0621317	0.0265784	-0.0580026	-0.0390594	14.8633	14.2096	14.3311	1.54452	1.06994	0.997751	-0.0236975	0.265992	2.45506	14.3013	13.8218	14.0448	11.1328	10.8119	10.8338	-0.052154	-0.0300102	0.0285749	-0.0321764	-0.012254	0.00490586	-0.0346029	-0.0155964	-0.0259698	13.5581	13.4249	13.3748	6.30391	6.37652	6.28237	14.1389	14.3115	14.334	-0.0275656	0.00921086	-0.0432956	-0.0101505	-0.0140733	-0.0334971	-0.0357906	-0.0515284	0.0154054
1619.34	46.2257	0.0213741	0.00320227	-0.0620625	0.0283113	-0.0615062	-0.038233	14.9437	14.3146	14.3817	1.61338	1.13441	1.06277	-0.0254316	0.268169	2.43717	14.4192	13.9454	14.1743	11.3923	11.0759	11.0927	-0.053701	-0.0290662	0.0288904	-0.0318719	-0.0104047	0.00533002	-0.0345928	-0.01532	-0.0264122	13.6831	13.5415	13.4889	6.48217	6.55793	6.45876	14.2242	14.3879	14.4018	-0.0254246	0.0110565	-0.0427828	-0.00853019	-0.0175322	-0.0322453	-0.0361039	-0.0511917	0.0147126
1622.56	46.2797	0.0251002	-0.000332578	-0.0617787	0.029826	-0.0649132	-0.0373216	15.0066	14.4036	14.4151	1.68222	1.20052	1.12943	-0.0272688	0.270531	2.41863	14.5215	14.054	14.2887	11.645	11.3335	11.3451	-0.055186	-0.0281382	0.0290933	-0.0314576	-0.00851948	0.00569384	-0.03444	-0.0150736	-0.0268225	13.7943	13.6441	13.589	6.65824	6.73706	6.63302	14.2957	14.4503	14.4555	-0.0232236	0.0129781	-0.0421936	-0.00684437	-0.0210462	-0.0308654	-0.0363447	-0.0507503	0.0139496
1625.95	46.3338	0.0286827	-0.00383353	-0.0612673	0.0311259	-0.0681839	-0.0363263	15.0514	14.4762	14.431	1.75091	1.26809	1.19751	-0.0292027	0.273064	2.39956	14.6075	14.1472	14.3874	11.8902	11.5843	11.5905	-0.0565985	-0.0272391	0.0291791	-0.030942	-0.0066044	0.00599429	-0.0341516	-0.0148589	-0.0271916	13.8912	13.7324	13.6748	6.83183	6.9136	6.80484	14.3532	14.4986	14.4951	-0.0209544	0.0149752	-0.0415287	-0.00508898	-0.024581	-0.029361	-0.0365009	-0.0502051	0.0131285
1629.32	46.3879	0.0320867	-0.00726093	-0.0605194	0.0322107	-0.0712813	-0.0352503	15.0777	14.5317	14.4291	1.81933	1.33694	1.26683	-0.0312247	0.275756	2.38009	14.6768	14.2244	14.4698	12.1274	11.8275	11.8282	-0.0579257	-0.0263791	0.029142	-0.0303314	-0.00466525	0.00623171	-0.0337372	-0.0146756	-0.0275145	13.9733	13.806	13.746	7.00263	7.08726	6.97393	14.3968	14.5328	14.5204	-0.018613	0.0170465	-0.0407864	-0.00326014	-0.0281014	-0.0277336	-0.0365642	-0.0495597	0.0122615
1632.55	46.442	0.0352753	-0.0105791	-0.05953	0.0330761	-0.0741726	-0.034098	15.0853	14.5698	14.4093	1.88734	1.40688	1.33716	-0.0333256	0.278599	2.36032	14.729	14.2853	14.5356	12.3562	12.0626	12.0577	-0.0591547	-0.0255653	0.0289747	-0.0296294	-0.00270726	0.00640863	-0.0332097	-0.0145214	-0.0277898	14.0404	13.8645	13.8021	7.17035	7.25772	7.13997	14.4263	14.5529	14.5318	-0.0162001	0.0191909	-0.0399622	-0.00135401	-0.0315715	-0.0259829	-0.0365302	-0.0488193	0.0113599
1635.76	46.496	0.0382114	-0.0137571	-0.0582985	0.0337141	-0.0768301	-0.0328739	15.0738	14.5901	14.3716	1.95484	1.47773	1.40831	-0.035497	0.281589	2.34035	14.7638	14.3295	14.5844	12.5758	12.289	12.2784	-0.0602738	-0.0248006	0.0286687	-0.028837	-0.000734553	0.00652773	-0.0325853	-0.0143929	-0.0280201	14.0922	13.9079	13.843	7.33466	7.42465	7.30264	14.442	14.559	14.5293	-0.0137202	0.0214078	-0.0390509	0.000633817	-0.0349558	-0.0241064	-0.0363985	-0.047989	0.0104342
1638.9	46.5501	0.0408603	-0.0167694	-0.0568286	0.0341145	-0.0792324	-0.0315822	15.0432	14.5922	14.316	2.0217	1.54931	1.48007	-0.0377333	0.28472	2.32026	14.7808	14.3566	14.6158	12.7858	12.5059	12.4896	-0.0612742	-0.0240848	0.0282146	-0.0279544	0.00124981	0.00659074	-0.0318819	-0.0142872	-0.0282108	14.1285	13.936	13.8687	7.49525	7.58772	7.46159	14.4439	14.5514	14.5132	-0.0111801	0.0236967	-0.0380476	0.0027087	-0.0382203	-0.0221001	-0.0361724	-0.0470739	0.0094934
1641.99	46.6042	0.0431917	-0.0195949	-0.0551288	0.0342668	-0.0813646	-0.0302273	14.9935	14.576	14.2429	2.08782	1.62144	1.55226	-0.040032	0.28799	2.30013	14.78	14.3665	14.6296	12.9855	12.7129	12.6907	-0.0621492	-0.0234142	0.0276043	-0.0269811	0.00324329	0.00659823	-0.031117	-0.0142029	-0.0283697	14.1493	13.9486	13.879	7.65176	7.74659	7.61649	14.4324	14.5304	14.484	-0.00858768	0.0260577	-0.0369481	0.00487712	-0.0413334	-0.0199595	-0.0358584	-0.0460779	0.00854526
1645.31	46.6583	0.0451804	-0.0222186	-0.0532107	0.0341623	-0.0832183	-0.0288126	14.9247	14.5414	14.1524	2.15308	1.69394	1.62468	-0.0423933	0.291391	2.28002	14.7613	14.3591	14.6257	13.1744	12.9092	12.881	-0.0628936	-0.0227826	0.0268316	-0.0259169	0.00524337	0.00654996	-0.0303067	-0.01414	-0.0285057	14.1545	13.9458	13.874	7.80388	7.9009	7.76699	14.4078	14.4964	14.442	-0.0059492	0.0284914	-0.0357495	0.00714681	-0.0442658	-0.0176806	-0.0354657	-0.0450053	0.00759659
1648.67	46.7123	0.0468061	-0.0246316	-0.0510886	0.033796	-0.0847917	-0.0273417	14.8371	14.4884	14.045	2.21738	1.76665	1.69715	-0.0448175	0.294919	2.25999	14.7246	14.3344	14.604	13.3517	13.0942	13.0599	-0.063503	-0.022181	0.0258937	-0.0247615	0.00724836	0.00644616	-0.0294633	-0.0141012	-0.028627	14.1441	13.9278	13.8539	7.95123	8.0503	7.91274	14.3705	14.4498	14.3877	-0.00326936	0.0309986	-0.0344502	0.00952695	-0.0469893	-0.0152592	-0.0350059	-0.0438628	0.00665339
1651.98	46.7664	0.0480539	-0.026831	-0.0487787	0.0331646	-0.0860876	-0.0258182	14.731	14.4171	13.9214	2.28062	1.8394	1.76951	-0.0473033	0.298566	2.24008	14.67	14.2923	14.5646	13.5169	13.2673	13.2268	-0.0639729	-0.0215993	0.0247906	-0.0235144	0.00925766	0.00628835	-0.028595	-0.0140912	-0.0287409	14.1185	13.8948	13.8189	8.09346	8.19443	8.05338	14.3209	14.3911	14.3218	-0.000551274	0.0335798	-0.0330497	0.0120287	-0.0494797	-0.0126902	-0.0344925	-0.0426595	0.00572069
1655.23	46.8205	0.0489144	-0.0288181	-0.0462994	0.0322657	-0.0871129	-0.0242462	14.607	14.3277	13.7822	2.34269	1.91204	1.8416	-0.0498465	0.302326	2.22033	14.5979	14.2332	14.5077	13.6694	13.428	13.381	-0.0642986	-0.0210267	0.0235238	-0.0221763	0.0112722	0.00608003	-0.0277072	-0.0141146	-0.0288537	14.0778	13.8469	13.7693	8.23022	8.33295	8.18856	14.2596	14.3209	14.2448	0.00220351	0.0362343	-0.0315482	0.014665	-0.0517158	-0.00996597	-0.0339394	-0.0414071	0.00480248
1658.41	46.8745	0.0493819	-0.030598	-0.0436715	0.0310982	-0.0878764	-0.0226309	14.4656	14.2206	13.6282	2.40351	1.98442	1.91327	-0.0524397	0.30619	2.20078	14.5086	14.1574	14.4335	13.8087	13.5755	13.522	-0.0644771	-0.0204524	0.0220947	-0.0207469	0.0132942	0.00582754	-0.0268041	-0.014176	-0.0289704	14.0224	13.7848	13.7055	8.36114	8.46548	8.31792	14.1871	14.2398	14.1575	0.0049944	0.0389607	-0.0299462	0.0174508	-0.0536809	-0.0070757	-0.0333617	-0.0401191	0.00390222
1661.54	46.9286	0.049457	-0.0321785	-0.0409189	0.0296606	-0.0883885	-0.0209783	14.3075	14.0963	13.4603	2.46297	2.0564	1.98438	-0.0550729	0.310147	2.18145	14.4025	14.0651	14.3424	13.9341	13.7095	13.6492	-0.0645082	-0.0198663	0.0205057	-0.0192254	0.0153259	0.00554045	-0.0258905	-0.0142792	-0.0290946	13.9528	13.7087	13.6281	8.48587	8.59168	8.44113	14.1041	14.1486	14.0603	0.00782183	0.041759	-0.0282446	0.0204032	-0.0553612	-0.0040062	-0.0327745	-0.038811	0.00302341
1664.84	46.9827	0.0491463	-0.0335691	-0.0380671	0.0279518	-0.0886607	-0.0192951	14.1337	13.9554	13.2796	2.521	2.12785	2.0548	-0.0577343	0.314183	2.16236	14.2802	13.957	14.2348	14.0451	13.8294	13.7622	-0.0643942	-0.0192602	0.0187615	-0.0176089	0.0173687	0.00523044	-0.0249733	-0.0144268	-0.0292283	13.8695	13.6193	13.5377	8.60406	8.71119	8.55784	14.0111	14.0478	13.9542	0.0106866	0.0446307	-0.0264459	0.0235399	-0.0567412	-0.000742528	-0.0321939	-0.0374991	0.00216985
1668.15	47.0368	0.0484622	-0.0347805	-0.0351432	0.0259723	-0.0887058	-0.0175883	13.9451	13.7987	13.087	2.57748	2.19866	2.12442	-0.0604101	0.318279	2.14352	14.1425	13.8337	14.1115	14.1413	13.9347	13.8604	-0.0641402	-0.018628	0.0168701	-0.0158934	0.019422	0.00491109	-0.0240607	-0.0146208	-0.0293715	13.7731	13.5172	13.4349	8.71538	8.82369	8.66773	13.9088	13.9382	13.8397	0.0135896	0.0475799	-0.0245553	0.0268786	-0.0578	0.00273058	-0.0316363	-0.0362006	0.00134588
1671.44	47.0908	0.0474224	-0.0358244	-0.0321744	0.0237271	-0.0885367	-0.0158658	13.7428	13.6269	12.8838	2.63233	2.26871	2.1931	-0.0630837	0.322413	2.12496	13.9901	13.6958	13.9731	14.2222	14.025	13.9434	-0.0637528	-0.0179665	0.014843	-0.0140731	0.0214835	0.00459749	-0.0231613	-0.0148628	-0.0295229	13.6643	13.4031	13.3205	8.8195	8.92884	8.77049	13.7979	13.8203	13.7175	0.0165322	0.0506132	-0.0225805	0.0304358	-0.0585118	0.00642718	-0.0311174	-0.0349317	0.000555799
1674.65	47.1449	0.0460485	-0.0367123	-0.0291871	0.0212277	-0.0881663	-0.0141368	13.5279	13.4412	12.671	2.68545	2.33789	2.26075	-0.0657355	0.326561	2.10668	13.8239	13.5441	13.8204	14.2874	14.1	14.0109	-0.0632402	-0.0172752	0.0126957	-0.0121412	0.0235494	0.00430589	-0.0222832	-0.0151547	-0.02968	13.5438	13.2777	13.1952	8.91611	9.02634	8.86582	13.679	13.695	13.5882	0.0195163	0.0537392	-0.0205317	0.0342252	-0.0588466	0.0103597	-0.0306518	-0.0337078	-0.000196447
1677.91	47.199	0.0443639	-0.0374542	-0.0262062	0.0184925	-0.087608	-0.0124119	13.3017	13.2425	12.4498	2.73676	2.40611	2.32726	-0.0683421	0.3307	2.08869	13.6448	13.3796	13.6543	14.3367	14.1595	14.0626	-0.0626105	-0.0165556	0.0104462	-0.0100899	0.0256147	0.00405507	-0.0214332	-0.0154986	-0.0298404	13.4124	13.1419	13.0597	9.00495	9.11589	8.95344	13.5529	13.5628	13.4526	0.0225443	0.0569674	-0.0184202	0.0382574	-0.0587713	0.0145387	-0.0302523	-0.0325445	-0.000907237
1681.16	47.2531	0.0423911	-0.0380577	-0.023255	0.0155475	-0.0868758	-0.0107035	13.0654	13.032	12.2214	2.78614	2.47327	2.39255	-0.0708776	0.334806	2.07101	13.454	13.2032	13.4757	14.3697	14.2031	14.0983	-0.0618718	-0.0158117	0.00811409	-0.00791114	0.0276745	0.00386637	-0.0206164	-0.0158976	-0.0300024	13.2709	12.9964	12.915	9.08574	9.19724	9.0331	13.42	13.4243	13.3111	0.0256184	0.0603064	-0.016256	0.042539	-0.058248	0.0189737	-0.0299285	-0.0314573	-0.00157323
1684.4	47.3071	0.0401507	-0.0385277	-0.0203558	0.012423	-0.0859842	-0.00902523	12.8203	12.8109	11.9869	2.83351	2.5393	2.45651	-0.0733132	0.338857	2.05363	13.2523	13.0157	13.2856	14.3863	14.2308	14.1178	-0.0610316	-0.0150497	0.00571921	-0.00559647	0.0297248	0.00376379	-0.0198357	-0.016355	-0.0301659	13.1201	12.842	12.7618	9.15828	9.27016	9.10456	13.281	13.28	13.1643	0.0287397	0.0637643	-0.0140462	0.0470726	-0.0572363	0.0236725	-0.0296868	-0.0304606	-0.00219113
1687.72	47.3612	0.0376601	-0.038866	-0.0175311	0.00915266	-0.084948	-0.00739202	12.5677	12.5805	11.7474	2.87876	2.60409	2.51907	-0.0756187	0.342833	2.03656	13.0409	12.8183	13.0851	14.3864	14.2424	14.1212	-0.0600976	-0.0142779	0.00328156	-0.00313844	0.0317624	0.00377358	-0.0190919	-0.0168744	-0.030331	12.9608	12.6795	12.6009	9.22236	9.33443	9.16764	13.1364	13.1304	13.0127	0.031908	0.0673482	-0.0117922	0.0518568	-0.0556928	0.0286412	-0.0295323	-0.0295663	-0.00275792
1690.93	47.4153	0.034935	-0.0390716	-0.0148021	0.00577353	-0.0837831	-0.00581954	12.3087	12.3419	11.5039	2.92179	2.66757	2.58016	-0.0777632	0.346718	2.01982	12.8209	12.6119	12.8752	14.3701	14.238	14.1084	-0.0590776	-0.0135066	0.000820618	-0.000530115	0.0337853	0.00392238	-0.0183838	-0.0174599	-0.0304971	12.7938	12.5098	12.4331	9.27783	9.3899	9.22217	12.9868	12.9761	12.8568	0.0351221	0.0710652	-0.00948877	0.0568859	-0.0535744	0.0338833	-0.0294673	-0.0287822	-0.00327056
1694.07	47.4694	0.0319898	-0.0391401	-0.0121893	0.00232394	-0.0825058	-0.00432302	12.0447	12.0964	11.2573	2.96251	2.72966	2.6397	-0.0797166	0.350497	2.00341	12.5933	12.3975	12.6569	14.3374	14.2177	14.0796	-0.0579798	-0.0127478	-0.00164454	0.00223458	0.0357919	0.00423498	-0.0177083	-0.0181158	-0.030662	12.62	12.3336	12.2592	9.32458	9.43645	9.26804	12.8326	12.8172	12.6968	0.0383808	0.0749218	-0.00712518	0.06215	-0.0508384	0.0394011	-0.0294914	-0.0281118	-0.00372624
1697.25	47.5234	0.0288385	-0.0390635	-0.00971106	-0.00115772	-0.0811321	-0.0029154	11.7767	11.8453	11.0085	3.00081	2.79027	2.69762	-0.0814504	0.354159	1.98733	12.3591	12.1761	12.4313	14.2885	14.1817	14.035	-0.0568121	-0.0120153	-0.00409543	0.00515984	0.0377809	0.00473305	-0.017059	-0.018847	-0.0308215	12.44	12.1515	12.0799	9.36252	9.47398	9.30516	12.6742	12.6543	12.5332	0.0416828	0.0789244	-0.00468598	0.0676358	-0.0474454	0.0451947	-0.0296018	-0.0275543	-0.00412248
1700.42	47.5775	0.0254959	-0.0388317	-0.0073833	-0.00463492	-0.079677	-0.00160734	11.5059	11.5896	10.7582	3.03659	2.84932	2.75387	-0.0829401	0.357695	1.9716	12.1193	11.9486	12.1993	14.2237	14.1301	13.975	-0.0555812	-0.0113244	-0.00651452	0.00824836	0.0397516	0.00543368	-0.0164262	-0.019659	-0.0309701	12.2546	11.9644	11.8957	9.39162	9.50246	9.33351	12.5119	12.4875	12.3662	0.0450279	0.0830797	-0.00215191	0.0733268	-0.0433596	0.051263	-0.0297932	-0.027106	-0.00445706
1703.74	47.6316	0.0219784	-0.0384343	-0.00521936	-0.00807424	-0.0781532	-0.000406093	11.2331	11.3305	10.5073	3.06975	2.90672	2.80837	-0.0841658	0.361095	1.95621	11.8748	11.716	11.9619	14.1436	14.0635	13.9001	-0.0542918	-0.010691	-0.0088858	0.0115015	0.0417041	0.00635014	-0.0157963	-0.0205589	-0.0311014	12.0643	11.7727	11.7074	9.41188	9.52189	9.35311	12.3462	12.3172	12.1961	0.0484161	0.087394	0.000498504	0.0792044	-0.0385537	0.0576031	-0.0300597	-0.0267595	-0.00472757
1707.11	47.6857	0.0183051	-0.0378629	-0.00322835	-0.011447	-0.0765714	0.000683636	10.9592	11.0691	10.2562	3.10021	2.96238	2.86106	-0.0851138	0.364354	1.94118	11.6265	11.4791	11.7199	14.0485	13.9822	13.8106	-0.052945	-0.0101317	-0.0111949	0.0149207	0.0436394	0.00749296	-0.0151519	-0.0215548	-0.0312084	11.8698	11.577	11.5154	9.42336	9.53232	9.364	12.1771	12.1435	12.0231	0.0518476	0.0918743	0.0032875	0.0852494	-0.033008	0.0642108	-0.0303962	-0.0265059	-0.00493081
1710.44	47.7397	0.0144978	-0.0371098	-0.00141562	-0.0147291	-0.0749397	0.00165986	10.6852	10.8061	10.0055	3.12786	3.01621	2.91188	-0.0857769	0.367467	1.92651	11.3751	11.2386	11.4742	13.939	13.8869	13.7073	-0.0515387	-0.00966262	-0.0134293	0.0185075	0.0455591	0.00887045	-0.0144717	-0.0226542	-0.0312831	11.6717	11.3779	11.3202	9.42615	9.53384	9.36629	12.0051	11.9668	11.8474	0.0553228	0.096528	0.00623699	0.0914425	-0.0267136	0.0710808	-0.030798	-0.0263343	-0.00506262
1713.69	47.7938	0.01058	-0.0361698	0.000216596	-0.0179001	-0.073264	0.0025229	10.4115	10.5426	9.75557	3.15264	3.0681	2.96077	-0.0861549	0.370434	1.91221	11.1213	10.9954	11.2255	13.816	13.7781	13.5909	-0.0500688	-0.00929914	-0.0155786	0.0222634	0.0474656	0.0104884	-0.0137337	-0.0238625	-0.0313185	11.4704	11.1758	11.1224	9.42039	9.5266	9.36013	11.8301	11.7871	11.6691	0.058843	0.101363	0.00936781	0.0977659	-0.0196729	0.0782065	-0.0312607	-0.0262331	-0.00511789
1716.96	47.8479	0.00657567	-0.0350391	0.00166969	-0.0209439	-0.0715473	0.00327491	10.1389	10.2791	9.50687	3.17446	3.11798	3.00764	-0.0862534	0.373256	1.89828	10.8658	10.75	10.9744	13.68	13.6566	13.4621	-0.048531	-0.0090539	-0.0176347	0.0261887	0.0493618	0.0123506	-0.0129168	-0.0251817	-0.0313081	11.2663	10.9712	10.9222	9.40626	9.51079	9.34569	11.6526	11.6047	11.4883	0.0624111	0.106387	0.0126989	0.104204	-0.0119024	0.0855799	-0.0317788	-0.0261893	-0.00509142
1720.17	47.9019	0.00250786	-0.0337164	0.00294808	-0.0238492	-0.0697905	0.00391894	9.86791	10.0163	9.2597	3.19326	3.16573	3.05243	-0.0860842	0.375939	1.88473	10.6092	10.5031	10.7217	13.5321	13.5231	13.3217	-0.0469227	-0.00893652	-0.0195917	0.0302822	0.0512511	0.0144592	-0.0120031	-0.0266087	-0.031246	11.0598	10.7643	10.7201	9.38397	9.48661	9.3232	11.4725	11.4197	11.3052	0.0660323	0.111609	0.0162463	0.110744	-0.00343314	0.0931922	-0.0323453	-0.0261899	-0.0049784
1723.36	47.956	-0.00160126	-0.0322038	0.00405919	-0.0266093	-0.0679926	0.00446048	9.59886	9.75489	9.01434	3.20897	3.21125	3.09507	-0.0856628	0.378492	1.87157	10.352	10.2551	10.4678	13.373	13.3785	13.1706	-0.0452427	-0.00895323	-0.0214446	0.0345389	0.0531366	0.0168142	-0.0109791	-0.0281356	-0.0311276	10.8513	10.5556	10.5164	9.35379	9.45434	9.29289	11.29	11.2323	11.12	0.0697141	0.117036	0.0200224	0.117374	0.00569259	0.101034	-0.0329513	-0.0262227	-0.00477498
1726.49	48.0101	-0.00573128	-0.0305063	0.00501331	-0.029222	-0.0661499	0.00490715	9.33216	9.49522	8.77102	3.22155	3.25444	3.13546	-0.0850073	0.380928	1.85881	10.0945	10.0066	10.2132	13.2037	13.2237	13.0098	-0.0434924	-0.00910798	-0.0231894	0.0389501	0.055022	0.0194135	-0.00983654	-0.0297505	-0.0309496	10.6411	10.3454	10.3113	9.31598	9.41428	9.25506	11.1053	11.0427	10.9326	0.0734667	0.122677	0.0240367	0.124085	0.0154263	0.109095	-0.0335858	-0.026278	-0.00447828
1729.72	48.0642	-0.00986332	-0.0286341	0.00582209	-0.0316889	-0.0642565	0.00526913	9.06812	9.2377	8.52997	3.23096	3.29519	3.17352	-0.0841375	0.383259	1.84644	9.83734	9.75792	9.95844	13.0252	13.0594	12.8401	-0.0416754	-0.00940263	-0.0248229	0.0435028	0.0569108	0.0222531	-0.00857179	-0.0314377	-0.0307108	10.4295	10.1338	10.1051	9.27088	9.36675	9.21002	10.9186	10.851	10.7433	0.0773037	0.128535	0.0282947	0.130869	0.0257146	0.117364	-0.0342361	-0.0263494	-0.00408729
1732.96	48.1182	-0.0139785	-0.026601	0.00649711	-0.0340141	-0.0623053	0.00555823	8.80699	8.98268	8.29137	3.23717	3.33339	3.20917	-0.0830732	0.385501	1.83448	9.58076	9.50945	9.70385	12.8384	12.8866	12.6625	-0.0397974	-0.00983716	-0.0263428	0.0481808	0.0588068	0.0253258	-0.0071878	-0.0331782	-0.030413	10.2166	9.9213	9.89801	9.21881	9.31211	9.15808	10.7299	10.6576	10.5521	0.0812413	0.134615	0.0327984	0.137717	0.0365024	0.125828	-0.034888	-0.0264337	-0.0036029
1736.24	48.1723	-0.0180577	-0.0244245	0.00704922	-0.0362034	-0.0602885	0.00578673	8.54899	8.73043	8.0554	3.24018	3.36892	3.24229	-0.0818337	0.387668	1.82293	9.32512	9.26151	9.44981	12.6444	12.7063	12.4778	-0.0378661	-0.0104097	-0.027748	0.0529656	0.0607138	0.0286223	-0.00569428	-0.0349506	-0.0300604	10.0028	9.70799	9.69025	9.16013	9.25075	9.0996	10.5393	10.4624	10.3593	0.0852976	0.140921	0.0375462	0.144624	0.0477361	0.134472	-0.0355256	-0.0265303	-0.00302777
1739.54	48.2264	-0.0220803	-0.0221256	0.00748821	-0.0382638	-0.0581991	0.00596676	8.29429	8.48117	7.82221	3.23997	3.40168	3.27281	-0.0804369	0.389771	1.81179	9.07071	9.01439	9.19664	12.4441	12.5192	12.2871	-0.0358901	-0.0111164	-0.029037	0.0578374	0.0626364	0.0321318	-0.00410748	-0.0367311	-0.0296598	9.78825	9.49413	9.482	9.09521	9.18305	9.03493	10.3471	10.2658	10.1649	0.0894907	0.147451	0.0425333	0.151585	0.0593673	0.143278	-0.0361313	-0.026641	-0.00236586
1742.8	48.2805	-0.0260248	-0.019728	0.0078224	-0.0402028	-0.0560327	0.00610983	8.04308	8.23509	7.59196	3.23656	3.43157	3.30061	-0.0788998	0.391822	1.80108	8.81783	8.76836	8.94465	12.2384	12.3261	12.091	-0.0338801	-0.0119519	-0.030208	0.0627757	0.0645797	0.0358422	-0.0024499	-0.0384951	-0.0292201	9.57314	9.27996	9.27343	9.02443	9.10942	8.96443	10.1533	10.068	9.96903	0.093838	0.154203	0.0477527	0.158596	0.071351	0.152226	-0.0366862	-0.0267681	-0.00162147
1745.97	48.3345	-0.0298683	-0.0172576	0.00805836	-0.0420271	-0.0537872	0.00622493	7.79549	7.99236	7.36479	3.22999	3.45847	3.32561	-0.077238	0.393833	1.79079	8.5667	8.52365	8.6941	12.0282	12.1279	11.8904	-0.0318493	-0.0129095	-0.031258	0.0677594	0.0665502	0.0397402	-0.000749327	-0.0402185	-0.0287513	9.35766	9.06568	9.06471	8.94817	9.03025	8.88845	9.95818	9.86909	9.77195	0.0983552	0.16117	0.0531975	0.165658	0.0836456	0.161289	-0.0371705	-0.0269142	-0.000799354
1749.3	48.3886	-0.0335868	-0.0147413	0.00820065	-0.04374	-0.0514633	0.00631748	7.55165	7.75312	7.14082	3.22029	3.4823	3.34772	-0.0754654	0.395812	1.78094	8.31758	8.28049	8.44526	11.8143	11.9253	11.686	-0.0298139	-0.0139812	-0.0321823	0.072767	0.0685551	0.0438121	0.000962332	-0.0418784	-0.0282634	9.142	8.8515	8.85598	8.8668	8.94594	8.80738	9.76177	9.66934	9.57378	0.103056	0.168341	0.0588617	0.17277	0.0962098	0.170438	-0.0375632	-0.0270802	9.57488e-05
1752.67	48.4427	-0.0371564	-0.0122055	0.00825183	-0.0453396	-0.0490639	0.00638891	7.31168	7.51749	6.92019	3.20753	3.50297	3.36686	-0.0735942	0.397769	1.77152	8.07065	8.03908	8.19835	11.5975	11.7189	11.4786	-0.027793	-0.0151584	-0.0329741	0.0777769	0.0706027	0.0480435	0.00265112	-0.0434547	-0.0277639	8.92635	8.63762	8.6474	8.7807	8.8569	8.72158	9.56427	9.46893	9.37469	0.107953	0.175703	0.0647401	0.179932	0.109004	0.179643	-0.0378426	-0.0272654	0.00105904
1755.93	48.4968	-0.0405546	-0.00967473	0.00821291	-0.0468199	-0.0465947	0.00643778	7.07568	7.28558	6.70301	3.19179	3.52039	3.38295	-0.0716336	0.399712	1.76255	7.82612	7.79962	7.9536	11.3785	11.5094	11.2686	-0.0258065	-0.0164316	-0.0336236	0.0827679	0.0727018	0.0524195	0.00428326	-0.0449301	-0.0272572	8.71086	8.42424	8.43909	8.69022	8.7635	8.63139	9.36583	9.26807	9.17485	0.113053	0.18324	0.0708278	0.187143	0.12199	0.188873	-0.0379884	-0.0274682	0.00208565
1759.01	48.5508	-0.0437623	-0.00716979	0.00808451	-0.0481713	-0.0440631	0.00645996	6.84374	7.0575	6.48937	3.17315	3.53449	3.39594	-0.0695898	0.401646	1.75402	7.58415	7.5623	7.71121	11.1579	11.2973	11.0566	-0.0238744	-0.017791	-0.0341198	0.087719	0.0748622	0.056925	0.00582586	-0.0462909	-0.0267449	8.49569	8.21155	8.23119	8.59571	8.66612	8.53718	9.1666	9.06694	8.97444	0.118362	0.190935	0.0771191	0.194401	0.135135	0.198097	-0.0379836	-0.0276855	0.00317019
1762.18	48.6049	-0.0467647	-0.00470653	0.00786737	-0.0493823	-0.041478	0.00645004	6.61596	6.83332	6.27936	3.15172	3.54524	3.40578	-0.0674652	0.403574	1.74595	7.3449	7.32728	7.47137	10.9363	11.0831	10.8431	-0.0220137	-0.0192284	-0.0344534	0.092611	0.0770952	0.0615469	0.00724821	-0.047528	-0.0262261	8.28102	7.99972	8.02383	8.49751	8.56511	8.43928	8.96674	8.8657	8.77365	0.123878	0.198771	0.0836064	0.201703	0.148406	0.207293	-0.0378173	-0.0279117	0.00430706
1765.39	48.659	-0.0495515	-0.00229583	0.0075624	-0.0504412	-0.0388484	0.00640237	6.3924	6.61311	6.07306	3.12762	3.55258	3.41244	-0.0652613	0.405493	1.73833	7.10851	7.09474	7.23426	10.7141	10.8673	10.6286	-0.020237	-0.0207377	-0.0346194	0.0974263	0.0794122	0.0662746	0.00852323	-0.0486362	-0.0256991	8.06697	7.78894	7.81716	8.39591	8.46081	8.33801	8.76642	8.66453	8.57265	0.129594	0.206731	0.0902797	0.209049	0.161778	0.21644	-0.0374857	-0.0281387	0.00549082
1768.7	48.713	-0.0521164	5.67244e-05	0.00717017	-0.0513374	-0.0361818	0.00631176	6.17313	6.39694	5.87052	3.10099	3.5565	3.4159	-0.0629811	0.407402	1.73117	6.87511	6.86484	7.00004	10.4919	10.6502	10.4132	-0.0185525	-0.0223151	-0.0346193	0.102151	0.0818248	0.0710999	0.00962811	-0.049613	-0.0251615	7.85372	7.57937	7.6113	8.29121	8.35351	8.23367	8.56578	8.46358	8.37162	0.135493	0.214801	0.0971263	0.21644	0.175224	0.225525	-0.0369914	-0.0283561	0.00671666
1772.09	48.7671	-0.0544556	0.0023509	0.00669026	-0.0520601	-0.0334837	0.00617344	5.9582	6.18486	5.6718	3.07196	3.55699	3.41615	-0.0606304	0.409297	1.72448	6.64484	6.63775	6.76886	10.2699	10.4321	10.1975	-0.0169651	-0.0239582	-0.0344609	0.106775	0.0843431	0.0760169	0.0105442	-0.0504559	-0.0246111	7.6414	7.37118	7.40641	8.18369	8.2435	8.12652	8.36501	8.263	8.17074	0.141555	0.222969	0.104131	0.223877	0.188719	0.234538	-0.0363413	-0.0285518	0.00798
1775.36	48.8212	-0.0565665	0.00459143	0.00612146	-0.0525995	-0.0307561	0.00598353	5.74767	5.97692	5.47692	3.04069	3.55408	3.41321	-0.0582175	0.411173	1.71826	6.41781	6.41361	6.54086	10.0484	10.2136	9.98165	-0.0154776	-0.025663	-0.0341574	0.111293	0.0869742	0.0810211	0.0112579	-0.0511614	-0.0240455	7.43017	7.16452	7.20263	8.0736	8.13106	8.01684	8.16426	8.06295	7.97017	0.147755	0.231228	0.111277	0.231364	0.202239	0.243473	-0.0355442	-0.0287112	0.00927629
1778.49	48.8753	-0.0584473	0.00678663	0.00546226	-0.0529476	-0.0279988	0.00573877	5.54158	5.77314	5.28592	3.00732	3.5478	3.40708	-0.0557522	0.413029	1.7125	6.19415	6.19256	6.31616	9.82794	9.99482	9.76598	-0.0140934	-0.0274226	-0.0337254	0.115703	0.0897234	0.0861086	0.0117599	-0.0517245	-0.0234624	7.22018	6.95955	7.00012	7.96116	8.0164	7.90485	7.96372	7.86355	7.77009	0.154065	0.239573	0.118546	0.238902	0.215759	0.252323	-0.0346091	-0.0288185	0.0106013
1781.7	48.9293	-0.0600961	0.0089466	0.00471239	-0.0530973	-0.0252109	0.0054376	5.33995	5.57356	5.09882	2.97203	3.53821	3.39783	-0.0532445	0.414864	1.70723	5.97395	5.97476	6.09489	9.60858	9.77615	9.55076	-0.0128159	-0.0292263	-0.0331837	0.120007	0.092594	0.0912773	0.0120467	-0.05214	-0.0228594	7.01159	6.7564	6.79902	7.84659	7.89977	7.79077	7.76357	7.66494	7.57066	0.160457	0.248	0.12592	0.24649	0.22925	0.261084	-0.0335432	-0.0288586	0.0119512
1784.99	48.9834	-0.0615122	0.0110824	0.00387477	-0.0530422	-0.0223914	0.00508024	5.14282	5.37821	4.91563	2.93499	3.52539	3.38549	-0.050705	0.416683	1.70243	5.75733	5.76031	5.87716	9.39061	9.55791	9.33625	-0.0116483	-0.0310607	-0.0325526	0.124208	0.0955891	0.0965263	0.0121219	-0.0524048	-0.0222357	6.80455	6.55522	6.59947	7.73008	7.78137	7.67479	7.56399	7.46723	7.37205	0.166908	0.256502	0.133381	0.254128	0.242681	0.269753	-0.0323523	-0.0288184	0.013322
1788.27	49.0375	-0.0626949	0.0132062	0.00295449	-0.0527767	-0.0195405	0.0046695	4.95019	5.18709	4.73635	2.89635	3.50941	3.37015	-0.0481453	0.418489	1.6981	5.54439	5.54935	5.66306	9.17425	9.34039	9.12271	-0.0105929	-0.0329099	-0.0318542	0.128312	0.0987112	0.101855	0.0119956	-0.0525174	-0.0215914	6.59921	6.35612	6.40162	7.61179	7.66138	7.5571	7.36516	7.27056	7.1744	0.173397	0.26507	0.140911	0.261811	0.256019	0.278328	-0.0310406	-0.0286887	0.0147098
1791.43	49.0916	-0.0636436	0.015331	0.00195759	-0.0522978	-0.0166598	0.00421115	4.76208	5.00022	4.56099	2.85631	3.49041	3.35191	-0.0455791	0.420288	1.69427	5.33521	5.34199	5.45268	8.9597	9.12391	8.91037	-0.00965034	-0.0347564	-0.0311142	0.132327	0.101963	0.107266	0.0116833	-0.0524765	-0.0209279	6.39572	6.15923	6.2056	7.49188	7.53998	7.43787	7.16726	7.07503	6.97787	0.179911	0.273686	0.148496	0.269531	0.269232	0.286808	-0.029612	-0.0284635	0.0161109
1794.66	49.1456	-0.064358	0.0174705	0.000890932	-0.0516038	-0.0137526	0.00371382	4.5785	4.8176	4.38953	2.81504	3.4685	3.33088	-0.0430212	0.422084	1.69091	5.1299	5.13834	5.24612	8.74714	8.90874	8.69949	-0.0088199	-0.036581	-0.0303613	0.136262	0.10535	0.112761	0.0112045	-0.0522806	-0.0202477	6.19423	5.96467	6.01156	7.37052	7.41734	7.31722	6.97046	6.88076	6.78261	0.186438	0.282331	0.156119	0.277279	0.282286	0.295194	-0.0280712	-0.0281385	0.017522
1797.92	49.1997	-0.0648365	0.0196371	-0.000238715	-0.0506954	-0.0108242	0.00318963	4.39944	4.6392	4.22196	2.77269	3.44384	3.30721	-0.0404874	0.42388	1.68805	4.92854	4.9385	5.04344	8.53674	8.69519	8.4903	-0.00810016	-0.0383632	-0.0296251	0.140128	0.108874	0.118341	0.0105808	-0.0519264	-0.0195536	5.99488	5.77253	5.81962	7.24784	7.29361	7.19531	6.77492	6.68788	6.58875	0.192973	0.290982	0.163767	0.285045	0.295153	0.303483	-0.0264237	-0.0277107	0.0189406
1801.18	49.2538	-0.0650776	0.0218407	-0.00142378	-0.0495763	-0.00788241	0.00265444	4.22489	4.465	4.05827	2.72944	3.41658	3.28103	-0.0379928	0.425678	1.68567	4.73122	4.74255	4.84472	8.32866	8.48352	8.28303	-0.00749009	-0.0400813	-0.028934	0.143939	0.11254	0.124009	0.00983472	-0.051408	-0.0188485	5.79781	5.58292	5.62989	7.12398	7.16893	7.07227	6.5808	6.49651	6.39642	0.19951	0.299617	0.171427	0.29282	0.307801	0.311669	-0.0246743	-0.027176	0.0203636
1804.39	49.3079	-0.0650796	0.0240866	-0.00265668	-0.0482503	-0.00493654	0.00212648	4.05485	4.29497	3.89845	2.68546	3.3869	3.25252	-0.0355505	0.427481	1.68378	4.53802	4.55057	4.65002	8.12305	8.274	8.07791	-0.0069905	-0.0417125	-0.0283133	0.147709	0.116352	0.129761	0.00898986	-0.050718	-0.0181349	5.60315	5.39592	5.44249	6.99907	7.04341	6.94821	6.38827	6.30678	6.20573	0.206046	0.308209	0.179086	0.300598	0.320203	0.319746	-0.0228261	-0.0265294	0.0217879
1807.64	49.3619	-0.0648397	0.0263746	-0.00392984	-0.0467203	-0.00199748	0.00162544	3.88931	4.12907	3.74249	2.64088	3.35498	3.22184	-0.0331707	0.429294	1.68238	4.34901	4.36262	4.4594	7.92004	8.06688	7.87515	-0.00660455	-0.0432331	-0.0277834	0.151453	0.120313	0.135595	0.00807016	-0.0498477	-0.0174149	5.41101	5.21162	5.25753	6.87322	6.91718	6.82325	6.19747	6.11881	6.0168	0.212583	0.316731	0.186734	0.308377	0.332327	0.3277	-0.0208784	-0.0257656	0.0232094
1810.88	49.416	-0.064355	0.0286984	-0.00523531	-0.0449858	0.000921443	0.00117059	3.72823	3.96726	3.59039	2.59587	3.321	3.18918	-0.0308609	0.431127	1.68148	4.16424	4.17876	4.27292	7.71975	7.86241	7.67495	-0.00633705	-0.0446188	-0.0273584	0.155189	0.124426	0.141504	0.00710033	-0.0487891	-0.0166894	5.22152	5.03008	5.07508	6.74658	6.79034	6.69753	6.00855	5.93273	5.82974	0.219123	0.325155	0.19436	0.316154	0.344142	0.335516	-0.0188258	-0.0248797	0.0246242
1814.19	49.4701	-0.0636214	0.0310459	-0.00656473	-0.0430434	0.00380422	0.00078005	3.5716	3.8095	3.44216	2.55055	3.28516	3.15474	-0.0286256	0.432989	1.68106	3.98376	3.99905	4.09062	7.5223	7.66079	7.47747	-0.00619278	-0.0458447	-0.0270443	0.158931	0.128695	0.147478	0.00610619	-0.047536	-0.0159569	5.03478	4.85139	4.89525	6.61925	6.66302	6.57116	5.82165	5.74865	5.64467	0.225668	0.333451	0.201951	0.323928	0.355614	0.343181	-0.0166597	-0.0238682	0.0260284
1817.48	49.5242	-0.0626349	0.0334016	-0.00790889	-0.0408853	0.00663112	0.000469903	3.41939	3.65574	3.2978	2.50504	3.24764	3.11872	-0.0264661	0.434893	1.68114	3.80761	3.82351	3.91254	7.3278	7.46221	7.28288	-0.00617494	-0.0468871	-0.0268389	0.162689	0.13312	0.153504	0.00511341	-0.0460842	-0.015214	4.85088	4.67559	4.71808	6.49136	6.53531	6.44427	5.6369	5.56669	5.46168	0.232222	0.341593	0.209495	0.331698	0.366713	0.350677	-0.0143699	-0.0227283	0.0274177
1820.77	49.5782	-0.0613924	0.0357471	-0.00925728	-0.0384999	0.00937791	0.000254118	3.27157	3.50595	3.1573	2.45948	3.20864	3.08133	-0.0243798	0.436848	1.6817	3.63579	3.6522	3.73874	7.13634	7.26682	7.0913	-0.00628303	-0.0477255	-0.0267337	0.166473	0.137702	0.159572	0.00414654	-0.0444332	-0.0144555	4.6699	4.50275	4.54367	6.36302	6.40734	6.31698	5.45442	5.38697	5.28089	0.238787	0.349553	0.216975	0.33946	0.37741	0.35799	-0.0119474	-0.0214592	0.0287875
1823.96	49.6323	-0.0598926	0.0380625	-0.0105989	-0.0358737	0.0120182	0.000144911	3.1281	3.3601	3.02069	2.41397	3.16834	3.04278	-0.0223623	0.438863	1.68276	3.46831	3.48514	3.56925	6.94799	7.07476	6.90286	-0.00651243	-0.0483448	-0.0267149	0.170284	0.14244	0.165669	0.00322773	-0.0425872	-0.0136768	4.49193	4.33292	4.37207	6.23438	6.27921	6.18943	5.27433	5.20959	5.10242	0.245359	0.357307	0.224373	0.347212	0.387681	0.365108	-0.00938648	-0.0200612	0.0301323
1827.21	49.6864	-0.0581364	0.0403276	-0.0119237	-0.0329922	0.0145257	0.000152093	2.98897	3.21814	2.88795	2.36861	3.12694	3.00326	-0.0204078	0.440945	1.68431	3.30518	3.32235	3.40409	6.76285	6.88613	6.71767	-0.00685433	-0.0487364	-0.026766	0.174122	0.147334	0.171786	0.00237464	-0.040554	-0.0128753	4.31702	4.16615	4.20336	6.10556	6.15104	6.06172	5.09675	5.03467	4.92636	0.251933	0.364831	0.231671	0.354951	0.397505	0.372016	-0.00668563	-0.0185369	0.0314466
1830.34	49.7404	-0.0561272	0.0425203	-0.0132246	-0.0298409	0.0168773	0.00028212	2.85411	3.08006	2.75908	2.32349	3.08461	2.963	-0.0185096	0.4431	1.68634	3.14637	3.16385	3.24329	6.58097	6.70101	6.53582	-0.00729729	-0.0488986	-0.0268693	0.177985	0.152384	0.177912	0.00159965	-0.0383436	-0.01205	4.14525	4.00248	4.03761	5.97668	6.02294	5.93398	4.92179	4.8623	4.75283	0.258498	0.372107	0.238853	0.362671	0.406866	0.378704	-0.00384699	-0.0168898	0.0327254
1833.49	49.7945	-0.0538698	0.0446193	-0.0144978	-0.0264065	0.0190557	0.000537868	2.7235	2.94582	2.63408	2.27868	3.04153	2.92216	-0.0166583	0.445335	1.68886	2.99188	3.00963	3.08686	6.40241	6.51946	6.35739	-0.00782923	-0.0488344	-0.0270046	0.181867	0.157584	0.184041	0.000909814	-0.0359669	-0.0112011	3.97667	3.84195	3.87489	5.84789	5.89503	5.80634	4.74958	4.69259	4.58193	0.265041	0.379118	0.245904	0.370364	0.415747	0.385162	-0.000874519	-0.0151226	0.0339648
1836.72	49.8486	-0.0513704	0.0466028	-0.0157419	-0.0226774	0.0210495	0.000919092	2.59707	2.8154	2.51294	2.23427	2.99786	2.88092	-0.0148414	0.447656	1.69186	2.84167	2.85968	2.93479	6.22723	6.34155	6.18246	-0.00843899	-0.0485507	-0.0271485	0.185765	0.16293	0.190162	0.000307257	-0.0334361	-0.0103289	3.81133	3.68459	3.71527	5.71931	5.76741	5.67891	4.58021	4.52564	4.41377	0.271548	0.385859	0.252813	0.378017	0.424133	0.391377	0.00222615	-0.0132374	0.0351616
1840	49.9027	-0.0486378	0.0484494	-0.0169572	-0.0186449	0.0228531	0.00142342	2.47477	2.68876	2.39562	2.1903	2.95377	2.83945	-0.013043	0.45007	1.69535	2.69571	2.71399	2.78709	6.05547	6.16731	6.0111	-0.00911626	-0.0480567	-0.0272736	0.189675	0.16841	0.196267	-0.000208939	-0.0307646	-0.00943191	3.6493	3.53043	3.5588	5.59108	5.6402	5.55183	4.41379	4.36153	4.24843	0.278004	0.392326	0.259572	0.38561	0.432007	0.397344	0.0054477	-0.0112373	0.0363135
1843.4	49.9567	-0.0456832	0.0501404	-0.0181444	-0.014304	0.024466	0.00204621	2.35653	2.5659	2.2821	2.14684	2.90938	2.79788	-0.0112464	0.452584	1.69931	2.55395	2.57253	2.64373	5.8872	5.99677	5.84338	-0.00985036	-0.0473644	-0.0273509	0.193594	0.174013	0.202346	-0.000640956	-0.0279704	-0.00850795	3.49062	3.37949	3.40556	5.46333	5.51352	5.42521	4.25039	4.20034	4.08602	0.284394	0.398519	0.266179	0.393122	0.439354	0.403059	0.00878148	-0.00912786	0.0374191
1846.78	50.0108	-0.0425199	0.0516603	-0.0193044	-0.00965454	0.0258913	0.00278164	2.24228	2.44678	2.17233	2.10393	2.86484	2.75634	-0.00943687	0.455208	1.70375	2.41637	2.43527	2.50468	5.72243	5.82995	5.67933	-0.0106292	-0.0464885	-0.0273527	0.197522	0.179724	0.20839	-0.000991312	-0.0250747	-0.00755363	3.33533	3.23179	3.2556	5.3362	5.38748	5.29918	4.09007	4.04213	3.92661	0.290704	0.404435	0.272628	0.400527	0.446163	0.408523	0.012216	-0.00691849	0.0384785
1849.91	50.0649	-0.0391625	0.052999	-0.020438	-0.00470219	0.0271361	0.00362374	2.13195	2.33137	2.06628	2.06161	2.82025	2.71495	-0.0076042	0.457949	1.70866	2.28292	2.30218	2.36993	5.56122	5.66683	5.519	-0.0114386	-0.045447	-0.0272561	0.201462	0.18553	0.214388	-0.00126292	-0.0221018	-0.00656441	3.18349	3.08734	3.10897	5.2098	5.26218	5.17384	3.9329	3.88697	3.77027	0.29692	0.410075	0.278919	0.407796	0.45243	0.413747	0.015736	-0.0046211	0.0394937
1853.07	50.119	-0.035626	0.0541513	-0.0215452	0.000542079	0.0282116	0.00456781	2.02545	2.21967	1.96387	2.01991	2.77574	2.67379	-0.00574377	0.460816	1.71404	2.15357	2.17322	2.23942	5.40358	5.50743	5.36241	-0.0122629	-0.0442604	-0.0270454	0.205417	0.191416	0.220332	-0.00145867	-0.0190781	-0.0055345	3.03513	2.94615	2.96572	5.08428	5.13773	5.04931	3.77892	3.7349	3.61708	0.303027	0.415436	0.28505	0.414896	0.458152	0.418743	0.0193219	-0.00224948	0.0404685
1856.31	50.173	-0.031925	0.0551157	-0.0226239	0.00606184	0.029134	0.00561191	1.92269	2.11163	1.86504	1.97884	2.73139	2.63295	-0.00385615	0.463818	1.71988	2.02826	2.04836	2.1131	5.24953	5.35173	5.20957	-0.0130859	-0.0429515	-0.0267114	0.209392	0.197369	0.226213	-0.00158116	-0.0160294	-0.00445713	2.89029	2.80824	2.82589	4.95976	5.01424	4.9257	3.62817	3.58598	3.46708	0.309008	0.420521	0.291017	0.421794	0.463336	0.42353	0.0229508	0.000182487	0.0414082
1859.59	50.2271	-0.0280733	0.0558941	-0.0236698	0.0118367	0.0299233	0.00675712	1.82359	2.0072	1.76972	1.93843	2.6873	2.5925	-0.00194576	0.466965	1.72618	1.90698	1.92753	1.99092	5.09909	5.19971	5.0605	-0.0138939	-0.0415441	-0.0262497	0.213396	0.203378	0.232023	-0.00163174	-0.0129804	-0.00332497	2.74903	2.6736	2.68952	4.83635	4.89179	4.80311	3.48068	3.44026	3.32032	0.314847	0.42533	0.296822	0.428461	0.467989	0.428127	0.0265981	0.00266153	0.0423188
1862.94	50.2812	-0.0240838	0.0564898	-0.0246748	0.0178427	0.0306038	0.00800669	1.72806	1.90635	1.67783	1.89867	2.64357	2.55248	-1.85894e-05	0.470277	1.73294	1.78968	1.81068	1.87281	4.95226	5.05135	4.91517	-0.0146767	-0.0400615	-0.0256597	0.21744	0.209428	0.237754	-0.00160986	-0.00995141	-0.00212995	2.61135	2.54225	2.55662	4.71419	4.77048	4.68164	3.33649	3.29777	3.17683	0.32053	0.42987	0.302466	0.434868	0.472121	0.432553	0.0302403	0.00517652	0.043206
1866.29	50.3353	-0.0199687	0.0569063	-0.0256267	0.0240515	0.0312032	0.00936522	1.63599	1.80901	1.58929	1.85957	2.60026	2.51293	0.00191983	0.473774	1.74015	1.67633	1.69777	1.75872	4.80904	4.90662	4.77359	-0.0154293	-0.0385247	-0.0249438	0.221536	0.21551	0.243398	-0.00151244	-0.00695828	-0.000863125	2.4773	2.41417	2.42719	4.59337	4.65039	4.56136	3.19562	3.15853	3.03662	0.32604	0.434146	0.307952	0.440993	0.475737	0.436828	0.0338566	0.00771915	0.0440753
1869.45	50.3893	-0.0157399	0.0571464	-0.0265078	0.0304296	0.0317511	0.0108377	1.54729	1.71511	1.504	1.82114	2.55746	2.47389	0.00386513	0.477488	1.7478	1.56686	1.58873	1.64858	4.66942	4.7655	4.6357	-0.0161508	-0.0369515	-0.0241075	0.225697	0.221611	0.248945	-0.00133329	-0.00401205	0.000485683	2.34689	2.28936	2.30123	4.47401	4.53159	4.44238	3.0581	3.02257	2.8997	0.331367	0.438164	0.313282	0.446815	0.478844	0.440971	0.0374303	0.0102825	0.0449315
1872.61	50.4434	-0.011409	0.057212	-0.0272945	0.0369385	0.0322778	0.0124292	1.46186	1.62458	1.4219	1.78337	2.51522	2.43537	0.00581504	0.481453	1.75588	1.46125	1.4835	1.54231	4.53336	4.62796	4.50147	-0.0168424	-0.0353549	-0.0231588	0.229932	0.227722	0.254386	-0.00106396	-0.0011187	0.00192714	2.22013	2.16782	2.17871	4.35619	4.41416	4.32476	2.92396	2.88987	2.76607	0.336498	0.441929	0.318459	0.452321	0.481444	0.445002	0.0409501	0.0128612	0.0457798
1875.77	50.4975	-0.00698624	0.0571045	-0.0279578	0.0435348	0.0328123	0.0141464	1.37958	1.53734	1.34288	1.74626	2.47359	2.39738	0.00777012	0.485707	1.7644	1.35943	1.38204	1.43987	4.40085	4.49395	4.37086	-0.0175056	-0.0337434	-0.0221076	0.23425	0.23383	0.259711	-0.000694323	0.00172072	0.00347095	2.09702	2.04953	2.0596	4.24	4.29818	4.20857	2.7932	2.76045	2.63574	0.341426	0.445444	0.323484	0.457499	0.483538	0.448939	0.0444099	0.0154507	0.0466255
1878.92	50.5516	-0.00248105	0.0568257	-0.0284659	0.0501725	0.03338	0.0159975	1.30036	1.4533	1.26687	1.70981	2.43262	2.35995	0.00973386	0.490289	1.77334	1.26134	1.28429	1.3412	4.27182	4.36346	4.2438	-0.0181416	-0.0321215	-0.0209653	0.238653	0.239928	0.264914	-0.000213176	0.00450887	0.00512412	1.97756	1.9345	1.94384	4.12552	4.18372	4.09388	2.66584	2.63429	2.50868	0.346144	0.448713	0.328355	0.462344	0.485126	0.452793	0.0478088	0.0180456	0.0474739
1882.34	50.6056	0.00209879	0.0563772	-0.0287851	0.0568036	0.0340029	0.0179928	1.22411	1.37238	1.1938	1.67404	2.39235	2.32308	0.0117124	0.495239	1.7827	1.16691	1.19018	1.24622	4.14624	4.23642	4.12024	-0.01875	-0.030491	-0.0197432	0.243142	0.246008	0.269995	0.000389584	0.00725182	0.00688852	1.86172	1.8227	1.83137	4.01281	4.07084	3.98073	2.54188	2.51138	2.38489	0.350645	0.451737	0.333068	0.466854	0.486205	0.456573	0.0511497	0.020639	0.04833
1885.7	50.6597	0.00674571	0.0557615	-0.0288825	0.06338	0.0346989	0.0201436	1.15071	1.29448	1.12358	1.63893	2.35279	2.28679	0.013714	0.500595	1.79246	1.07607	1.09967	1.15488	4.02404	4.1128	4.00011	-0.0193292	-0.0288513	-0.0184526	0.247715	0.252068	0.274955	0.00112164	0.00995917	0.00876011	1.74948	1.71413	1.72212	3.90193	3.95964	3.86918	2.42134	2.39169	2.26435	0.354925	0.454517	0.337616	0.471036	0.486779	0.460277	0.0544382	0.0232238	0.049198
1888.83	50.7138	0.0114512	0.0549812	-0.0287288	0.0698548	0.0354826	0.0224606	1.08007	1.2195	1.05614	1.6045	2.31399	2.25108	0.0157493	0.506396	1.80263	0.988743	1.01268	1.06711	3.90514	3.99255	3.88336	-0.0198774	-0.0271997	-0.017105	0.252369	0.258112	0.279802	0.00198708	0.012645	0.0107288	1.6408	1.60876	1.61604	3.79294	3.85015	3.75926	2.30422	2.27523	2.14706	0.358981	0.457052	0.341992	0.4749	0.486853	0.463895	0.0576822	0.0257939	0.0500821
1891.97	50.7678	0.0162057	0.0540393	-0.0283002	0.0761823	0.0363646	0.0249529	1.0121	1.14735	0.99143	1.57075	2.27595	2.21598	0.0178316	0.512674	1.81319	0.90483	0.929158	0.982862	3.78948	3.87563	3.76992	-0.0203934	-0.0255309	-0.0157111	0.257099	0.264148	0.284543	0.00298517	0.0153275	0.0127798	1.53566	1.50658	1.51304	3.68588	3.74246	3.65102	2.19053	2.16197	2.033	0.362809	0.459343	0.346192	0.478462	0.486436	0.467411	0.0608928	0.0283471	0.0509868
1895.31	50.8219	0.0209985	0.05294	-0.0275786	0.0823191	0.0373516	0.0276278	0.946687	1.07793	0.929373	1.53767	2.23868	2.18151	0.0199777	0.51946	1.82414	0.824239	0.849032	0.902062	3.67698	3.76198	3.65973	-0.0208769	-0.0238369	-0.0142794	0.261901	0.270187	0.289187	0.00411171	0.0180286	0.0148958	1.43399	1.40756	1.41305	3.58078	3.63662	3.54451	2.08026	2.05189	1.92216	0.366406	0.461391	0.35021	0.481737	0.485537	0.470801	0.0640833	0.0308871	0.0519171
1898.64	50.876	0.0258173	0.0516886	-0.0265532	0.0882263	0.0384465	0.0304906	0.88375	1.01116	0.869909	1.50528	2.20219	2.14769	0.0222083	0.526778	1.83546	0.746868	0.772233	0.824642	3.56756	3.65157	3.55271	-0.0213259	-0.0221068	-0.0128151	0.266768	0.276239	0.293743	0.00536047	0.0207712	0.0170583	1.33575	1.31167	1.31602	3.47768	3.53269	3.43976	1.97339	1.94498	1.81452	0.369771	0.463202	0.354042	0.484743	0.484171	0.474037	0.0672691	0.0334234	0.0528777
1901.84	50.9301	0.0306456	0.0502929	-0.0252203	0.0938701	0.0396494	0.0335452	0.823194	0.946938	0.812969	1.47358	2.16647	2.11453	0.0245484	0.534646	1.84715	0.672613	0.698689	0.750531	3.46113	3.54431	3.4488	-0.0217358	-0.0203272	-0.0113202	0.271696	0.282313	0.29822	0.00672359	0.0235766	0.0192488	1.24087	1.21889	1.22187	3.37661	3.43071	3.33684	1.86989	1.84121	1.71008	0.372905	0.464781	0.357681	0.487499	0.482355	0.477092	0.0704664	0.0359692	0.0538731
1905.01	50.9841	0.035462	0.048764	-0.023584	0.099222	0.0409578	0.0367944	0.764935	0.885186	0.758485	1.44258	2.13151	2.08206	0.0270267	0.543077	1.85919	0.601368	0.62833	0.679647	3.35761	3.44016	3.34793	-0.0220973	-0.0184823	-0.00979494	0.276678	0.288414	0.302626	0.00819351	0.0264619	0.0214502	1.14928	1.12918	1.13055	3.27759	3.33074	3.23578	1.76973	1.74057	1.60882	0.375809	0.466133	0.361118	0.490023	0.480116	0.479939	0.07369	0.0385382	0.0549069
1908.31	51.0382	0.0402399	0.0471172	-0.021656	0.104259	0.0423677	0.040241	0.708895	0.825825	0.706383	1.41229	2.09732	2.05028	0.0296746	0.552076	1.87159	0.533026	0.561082	0.611904	3.25693	3.33903	3.25003	-0.0223966	-0.0165565	-0.00824038	0.281707	0.294551	0.306967	0.00976303	0.0294381	0.0236468	1.0609	1.0425	1.04202	3.18062	3.2328	3.13665	1.67284	1.64302	1.51073	0.378484	0.467264	0.364345	0.492335	0.477487	0.482558	0.0769519	0.0411447	0.0559815
1911.56	51.0923	0.0449476	0.0453725	-0.0194563	0.108962	0.043875	0.0438882	0.655004	0.768782	0.656588	1.38273	2.06387	2.01922	0.0325264	0.561644	1.88432	0.467488	0.496868	0.547206	3.159	3.24084	3.15503	-0.0226147	-0.0145358	-0.00665961	0.286779	0.300729	0.31125	0.0114249	0.0325098	0.0258253	0.975666	0.95881	0.956242	3.08573	3.13694	3.0395	1.57919	1.54857	1.4158	0.380928	0.46818	0.367352	0.494456	0.474519	0.484931	0.0802594	0.0438027	0.0570981
1914.87	51.1464	0.0495493	0.0435541	-0.0170114	0.113321	0.0454771	0.0477405	0.603192	0.713993	0.60902	1.3539	2.03116	1.98887	0.0356191	0.571778	1.89737	0.404656	0.435606	0.485443	3.06375	3.14553	3.06286	-0.0227283	-0.0124097	-0.00505748	0.291889	0.306955	0.31548	0.0131724	0.0356745	0.027976	0.893491	0.878065	0.87319	2.99291	3.04318	2.94441	1.48871	1.45719	1.32404	0.383134	0.468886	0.370132	0.496406	0.471272	0.487049	0.0836162	0.0465264	0.0582572
1918.16	51.2004	0.0540066	0.0416912	-0.0143546	0.11733	0.0471734	0.0518022	0.553401	0.661395	0.563595	1.32583	1.99919	1.95924	0.0389921	0.582474	1.91075	0.344444	0.377212	0.4265	2.97111	3.05301	2.97345	-0.0227114	-0.0101727	-0.00343939	0.297037	0.313233	0.319662	0.0150013	0.0389245	0.030093	0.814308	0.800222	0.792844	2.90218	2.95153	2.85143	1.40135	1.36887	1.23542	0.385097	0.469388	0.372679	0.498204	0.467822	0.488908	0.0870231	0.0493305	0.0594589
1921.24	51.2545	0.0582805	0.039818	-0.0115242	0.120989	0.0489667	0.0560766	0.505571	0.610935	0.520229	1.29852	1.96795	1.9303	0.0426881	0.593729	1.92443	0.286772	0.321601	0.370257	2.88103	2.96319	2.88673	-0.0225366	-0.00782283	-0.00180971	0.302224	0.319562	0.323797	0.0169091	0.0422485	0.0321767	0.738042	0.72523	0.715191	2.81353	2.86199	2.76063	1.31704	1.28358	1.14992	0.386807	0.469691	0.374993	0.499868	0.464251	0.490508	0.0904806	0.0522313	0.0607034
1924.28	51.3086	0.0623313	0.0379722	-0.00856053	0.124303	0.0508639	0.0605637	0.459646	0.562562	0.47884	1.27199	1.93745	1.90203	0.0467531	0.605545	1.93841	0.23157	0.268683	0.316591	2.79345	2.876	2.80261	-0.0221755	-0.00536077	-0.000171097	0.307456	0.325936	0.327884	0.0188964	0.0456341	0.0342345	0.664627	0.65304	0.640221	2.72697	2.77458	2.67206	1.23572	1.2013	1.06753	0.388258	0.469802	0.377077	0.501409	0.460646	0.491856	0.0939893	0.0552457	0.0619912
1927.67	51.3627	0.066119	0.0361929	-0.00550316	0.127282	0.0528776	0.0652607	0.415574	0.516228	0.439343	1.24625	1.90769	1.87442	0.0512368	0.617924	1.95267	0.178773	0.21837	0.265382	2.70832	2.79136	2.72101	-0.0215994	-0.00278817	0.00147518	0.312736	0.332342	0.331915	0.0209673	0.0490678	0.03628	0.594001	0.583597	0.567927	2.6425	2.68928	2.58576	1.15735	1.12199	0.988207	0.389444	0.469722	0.378938	0.502839	0.457096	0.492964	0.0975493	0.0583901	0.0633226
1931.14	51.4167	0.0696031	0.0345191	-0.00238737	0.129936	0.0550253	0.0701616	0.373303	0.471889	0.401659	1.22133	1.87865	1.84741	0.0561921	0.630875	1.9672	0.128323	0.170571	0.216514	2.6256	2.70919	2.64183	-0.0207785	-0.000107115	0.0031272	0.318072	0.338761	0.335883	0.0231281	0.0525349	0.0383318	0.526099	0.516846	0.498305	2.56013	2.6061	2.50179	1.08186	1.04561	0.91193	0.390366	0.469452	0.380585	0.504162	0.453688	0.493851	0.10116	0.061677	0.0646984
1934.35	51.4708	0.0727445	0.0329899	0.00075768	0.132279	0.0573282	0.0752589	0.332784	0.429504	0.365711	1.19722	1.85036	1.82098	0.0616758	0.644408	1.98199	0.0801686	0.125194	0.169878	2.54526	2.62944	2.56499	-0.0196817	0.00268033	0.00478114	0.32347	0.34517	0.339777	0.0253868	0.0560196	0.0404104	0.460864	0.452729	0.431349	2.47985	2.52501	2.42017	1.00919	0.972091	0.838658	0.391027	0.468987	0.38203	0.505382	0.450507	0.494541	0.104817	0.0651136	0.0661201
1937.47	51.5249	0.0755068	0.0316432	0.00390917	0.134325	0.0598109	0.0805438	0.293966	0.389029	0.331421	1.17394	1.82278	1.79509	0.0677468	0.658536	1.99703	0.0342619	0.0821474	0.125369	2.46725	2.55204	2.49039	-0.0182775	0.00557265	0.00643062	0.328938	0.351539	0.34359	0.0277533	0.0595054	0.0425358	0.398233	0.391185	0.367057	2.40167	2.44601	2.34092	0.939292	0.901379	0.768352	0.391435	0.46832	0.383287	0.506501	0.447632	0.495063	0.108519	0.0687001	0.06759
1940.67	51.5789	0.0778605	0.030515	0.00705057	0.136091	0.0624996	0.0860067	0.256795	0.350418	0.298719	1.15149	1.79593	1.76968	0.0744659	0.673276	2.01231	-0.00944012	0.0413422	0.0828882	2.39155	2.47691	2.41794	-0.0165364	0.00856903	0.00806757	0.334484	0.357841	0.347316	0.0302385	0.0629758	0.0447271	0.338152	0.332151	0.305416	2.3256	2.36906	2.26404	0.87211	0.833408	0.700966	0.391604	0.467442	0.38437	0.507523	0.445131	0.495446	0.112257	0.0724312	0.0691105
1943.86	51.633	0.079784	0.0296381	0.0101722	0.137595	0.0654194	0.091637	0.221215	0.313622	0.267537	1.12986	1.76981	1.74472	0.0818939	0.688645	2.02781	-0.0509785	0.00269149	0.0423462	2.31812	2.404	2.34754	-0.014434	0.0116694	0.00968273	0.34012	0.364045	0.350952	0.0328527	0.0664164	0.0470007	0.280574	0.275564	0.246414	2.25165	2.29414	2.18954	0.807585	0.768101	0.636446	0.391547	0.466347	0.385296	0.508454	0.443063	0.495722	0.116023	0.0762982	0.0706846
1947.21	51.6871	0.0812636	0.029041	0.013272	0.13886	0.068593	0.0974234	0.187165	0.278586	0.237813	1.10905	1.74439	1.72017	0.0900905	0.704665	2.04352	-0.0903951	-0.0338862	0.0036612	2.24691	2.33324	2.2791	-0.0119532	0.0148749	0.011267	0.345858	0.370125	0.354497	0.0356059	0.0698158	0.0493705	0.225456	0.221355	0.190026	2.17982	2.22121	2.11739	0.745659	0.705375	0.574732	0.39128	0.465027	0.38608	0.509304	0.441477	0.495921	0.119806	0.0802897	0.0723154
1950.58	51.7412	0.0822952	0.0287482	0.0163559	0.139907	0.0720383	0.103353	0.154581	0.245251	0.20949	1.08906	1.71968	1.69598	0.0991125	0.721359	2.05943	-0.127734	-0.0684666	-0.0332393	2.17789	2.26459	2.21254	-0.00908658	0.0181878	0.0128125	0.351709	0.376059	0.35795	0.0385075	0.073167	0.0518486	0.172767	0.169456	0.136224	2.11012	2.15026	2.04756	0.686269	0.645137	0.51576	0.39082	0.463479	0.386739	0.510086	0.440414	0.496073	0.123595	0.0843926	0.0740068
1953.81	51.7952	0.0828832	0.0287787	0.0194373	0.140762	0.0757681	0.109412	0.1234	0.213549	0.182517	1.06987	1.69566	1.67213	0.109013	0.738753	2.07552	-0.163046	-0.10112	-0.06842	2.11102	2.19798	2.14776	-0.00583616	0.0216102	0.0143128	0.357682	0.381828	0.361311	0.0415657	0.0764679	0.0544444	0.122476	0.119793	0.0849698	2.04256	2.08124	1.98002	0.629346	0.587288	0.459461	0.390184	0.461698	0.387288	0.510813	0.439896	0.496203	0.127377	0.0885928	0.0757628
1956.97	51.8493	0.0830437	0.0291461	0.0225341	0.141453	0.0797889	0.115587	0.0935535	0.183411	0.156841	1.05146	1.6723	1.64859	0.11984	0.756871	2.09178	-0.196385	-0.131913	-0.101939	2.04626	2.13336	2.08468	-0.00221286	0.0251434	0.0157648	0.36378	0.387416	0.364576	0.0447887	0.0797202	0.0571646	0.0745507	0.072292	0.0362162	1.97714	2.01413	1.91471	0.574819	0.531721	0.405763	0.389395	0.459685	0.387736	0.5115	0.43993	0.496336	0.131141	0.0928753	0.0775895
1960.27	51.9034	0.0828028	0.0298578	0.025667	0.142013	0.0841013	0.121865	0.0649759	0.154764	0.132409	1.03384	1.64958	1.62534	0.131635	0.775741	2.10821	-0.227816	-0.160911	-0.133848	1.98355	2.0707	2.02322	0.0017647	0.0287891	0.0171701	0.370004	0.39281	0.367748	0.0481847	0.0829281	0.0600119	0.0289623	0.0268757	-0.010091	1.91385	1.94889	1.85158	0.522612	0.478332	0.354592	0.388478	0.457446	0.388088	0.512165	0.440508	0.496494	0.134879	0.0972232	0.0794937
1963.6	51.9575	0.0821964	0.0309145	0.0288573	0.142477	0.0886997	0.128233	0.037602	0.127525	0.109171	1.01698	1.62747	1.60237	0.144439	0.795387	2.12478	-0.257409	-0.188176	-0.164197	1.92285	2.00993	1.96333	0.00607156	0.0325492	0.018535	0.376345	0.398002	0.370829	0.0517617	0.0860979	0.0629859	-0.0143283	-0.0165343	-0.0540149	1.8527	1.88551	1.79059	0.472645	0.427021	0.305872	0.38746	0.454992	0.388341	0.512825	0.441606	0.496694	0.138581	0.101617	0.0814832
1966.72	52.0115	0.0812693	0.0323123	0.0321263	0.142884	0.0935719	0.134677	0.0113686	0.101612	0.0870723	1.00088	1.60593	1.57968	0.158288	0.815836	2.14148	-0.285237	-0.213773	-0.19303	1.86411	1.95102	1.90495	0.0106779	0.0364256	0.0198712	0.382792	0.402989	0.373825	0.0555272	0.0892367	0.066083	-0.0553593	-0.0580143	-0.0956246	1.79365	1.82396	1.73167	0.424835	0.377698	0.259525	0.386371	0.45234	0.388488	0.513501	0.443183	0.496949	0.142239	0.106036	0.0835656
1969.85	52.0656	0.0800732	0.0340407	0.0354935	0.143277	0.0986984	0.141183	-0.0137835	0.076938	0.0660556	0.985521	1.58493	1.55727	0.173215	0.837117	2.1583	-0.311373	-0.237767	-0.220393	1.80728	1.89391	1.84802	0.0155499	0.0404187	0.0211947	0.389326	0.407773	0.376746	0.0594869	0.0923515	0.0692972	-0.0941731	-0.0976426	-0.134994	1.73667	1.76421	1.67476	0.379096	0.33028	0.215469	0.385241	0.449515	0.388521	0.514217	0.445192	0.497275	0.145844	0.110458	0.0857479
1973.1	52.1197	0.0786654	0.0360849	0.0389752	0.143701	0.104055	0.147735	-0.0379104	0.0534166	0.0460583	0.970893	1.56445	1.53517	0.189255	0.859256	2.17523	-0.335892	-0.260224	-0.246331	1.75231	1.83853	1.79252	0.0206513	0.0445253	0.0225263	0.395923	0.412367	0.379607	0.0636428	0.0954483	0.072621	-0.130817	-0.135491	-0.172199	1.68173	1.70623	1.61981	0.335338	0.284695	0.173618	0.384096	0.446544	0.388437	0.514993	0.447575	0.497681	0.149389	0.114864	0.0880356
1976.36	52.1738	0.0771063	0.0384274	0.0425824	0.144199	0.109613	0.154316	-0.0610644	0.0309665	0.0270134	0.956984	1.54443	1.51339	0.20644	0.882284	2.19224	-0.358861	-0.281213	-0.27089	1.69915	1.78484	1.7384	0.025945	0.0487374	0.0238908	0.402554	0.416786	0.382425	0.067993	0.0985315	0.0760476	-0.165339	-0.171629	-0.207319	1.62877	1.65	1.56675	0.29347	0.240882	0.133885	0.382959	0.443462	0.388235	0.515848	0.450269	0.498177	0.152866	0.119237	0.0904333
1979.64	52.2278	0.075458	0.0410497	0.0463185	0.144815	0.115342	0.160906	-0.0832929	0.00951288	0.00884896	0.943784	1.52486	1.49196	0.224805	0.906231	2.20934	-0.380344	-0.300808	-0.294118	1.64775	1.73276	1.68565	0.0313949	0.0530415	0.025318	0.409185	0.421054	0.385221	0.0725302	0.101604	0.079572	-0.197797	-0.206123	-0.240436	1.57773	1.5955	1.51553	0.253397	0.198786	0.0961773	0.381848	0.440308	0.387919	0.516792	0.453209	0.498768	0.15627	0.123563	0.0929452
1982.87	52.2819	0.0737838	0.0439336	0.0501788	0.145588	0.121215	0.167489	-0.104636	-0.0110112	-0.00851192	0.931281	1.5057	1.47089	0.244388	0.93113	2.22649	-0.400398	-0.319087	-0.316063	1.59805	1.68222	1.63427	0.0369674	0.0574195	0.0268427	0.415783	0.425191	0.388016	0.0772423	0.10467	0.0831922	-0.228254	-0.239039	-0.271633	1.52855	1.54269	1.46608	0.215025	0.158365	0.0603996	0.380776	0.437127	0.387495	0.517831	0.456331	0.499458	0.159596	0.127835	0.0955746
1986.17	52.336	0.0721452	0.0470611	0.0541502	0.146554	0.127205	0.174045	-0.125129	-0.0306637	-0.0251491	0.919467	1.48693	1.45022	0.265228	0.957017	2.2437	-0.419075	-0.336136	-0.336775	1.55	1.63316	1.58425	0.0426329	0.061849	0.0285061	0.422311	0.42922	0.390829	0.0821126	0.107733	0.0869089	-0.25678	-0.270442	-0.300994	1.48115	1.49158	1.41836	0.178265	0.119588	0.026456	0.379754	0.433969	0.386974	0.518961	0.459575	0.500248	0.162842	0.132051	0.0983242
1989.44	52.3901	0.0706001	0.0504142	0.0582109	0.147742	0.133295	0.180559	-0.144799	-0.0494936	-0.0411425	0.908328	1.46853	1.42997	0.287371	0.98393	2.26095	-0.436424	-0.352052	-0.356304	1.50358	1.58549	1.5356	0.0483678	0.0663048	0.0303523	0.428739	0.43316	0.393679	0.0871202	0.110794	0.0907247	-0.283456	-0.300396	-0.328597	1.43544	1.44213	1.3723	0.143034	0.0824335	-0.0057473	0.378794	0.430881	0.386366	0.520172	0.46289	0.501137	0.166009	0.136211	0.101196
1992.69	52.4441	0.0691995	0.0539759	0.0623321	0.149181	0.139469	0.187012	-0.163672	-0.0675403	-0.0565694	0.897854	1.45047	1.41015	0.310864	1.01191	2.27822	-0.452492	-0.366938	-0.374704	1.45873	1.53916	1.48832	0.054156	0.0707591	0.0324272	0.435038	0.437026	0.396586	0.0922411	0.113855	0.0946431	-0.308371	-0.328969	-0.354517	1.39135	1.39432	1.32787	0.109256	0.0468866	-0.0363012	0.377904	0.427914	0.385686	0.52145	0.466234	0.502126	0.169096	0.140317	0.10419
1995.9	52.4982	0.0679872	0.0577302	0.0664785	0.150889	0.145719	0.193388	-0.181769	-0.0848343	-0.0715016	0.888031	1.43275	1.3908	0.335759	1.04099	2.29549	-0.467319	-0.380902	-0.392026	1.41542	1.49407	1.44243	0.0599902	0.0751839	0.0347746	0.441186	0.440831	0.399569	0.0974495	0.116914	0.0986676	-0.331618	-0.356225	-0.378826	1.34878	1.34811	1.28501	0.0768587	0.0129391	-0.0652919	0.377092	0.425112	0.384948	0.522777	0.469582	0.503215	0.172108	0.144373	0.107307
1999.19	52.5523	0.0669985	0.0616621	0.0706095	0.152884	0.152041	0.199669	-0.199108	-0.101396	-0.086002	0.878841	1.41537	1.37192	0.362112	1.07123	2.31277	-0.480945	-0.394055	-0.408324	1.3736	1.45016	1.39793	0.0658706	0.0795523	0.0374357	0.447165	0.444579	0.402643	0.10272	0.119968	0.102801	-0.353295	-0.382224	-0.401591	1.30765	1.30349	1.24367	0.0457781	-0.0194158	-0.0928011	0.376367	0.422516	0.384168	0.524138	0.47292	0.504405	0.17505	0.148384	0.110542
2002.48	52.6063	0.0662608	0.0657586	0.0746808	0.155177	0.158437	0.205835	-0.215707	-0.117237	-0.100122	0.870265	1.39832	1.35352	0.38998	1.10266	2.33002	-0.493407	-0.406502	-0.423651	1.33326	1.40735	1.35482	0.0718037	0.0838416	0.0404465	0.452962	0.448273	0.405826	0.108025	0.123012	0.107047	-0.373496	-0.407025	-0.422879	1.26787	1.2604	1.20381	0.0159568	-0.0501869	-0.118905	0.37573	0.420164	0.383366	0.525516	0.476248	0.505699	0.177932	0.152361	0.113893
2005.74	52.6604	0.0657927	0.0700074	0.0786474	0.157773	0.164915	0.211867	-0.231581	-0.132363	-0.113901	0.86228	1.3816	1.3356	0.41942	1.13533	2.34724	-0.504743	-0.418342	-0.438059	1.29434	1.36557	1.31308	0.0777995	0.088035	0.0438373	0.458571	0.451908	0.40913	0.113341	0.126038	0.111406	-0.392314	-0.430681	-0.442757	1.22938	1.21881	1.1654	-0.0126529	-0.0793883	-0.143672	0.375182	0.418086	0.382563	0.526896	0.479577	0.507099	0.180761	0.156315	0.117354
2008.95	52.7145	0.0656034	0.0743972	0.0824674	0.160675	0.171487	0.217743	-0.246749	-0.146776	-0.127364	0.854858	1.36522	1.31817	0.450493	1.1693	2.36442	-0.514995	-0.42967	-0.451597	1.25681	1.32477	1.2727	0.08387	0.0921221	0.0476317	0.463988	0.455476	0.412564	0.118639	0.129037	0.115877	-0.409837	-0.453244	-0.461293	1.19211	1.17868	1.12839	-0.0400886	-0.107041	-0.167165	0.374722	0.416306	0.381784	0.528266	0.482934	0.508613	0.183548	0.160259	0.120915
2012.15	52.7686	0.0656932	0.0789171	0.0861057	0.163877	0.178169	0.223444	-0.261227	-0.160472	-0.140524	0.847967	1.34919	1.30121	0.483259	1.2046	2.38154	-0.524212	-0.440565	-0.464315	1.22064	1.28487	1.23366	0.0900285	0.0960984	0.051846	0.469212	0.458966	0.416131	0.123893	0.132	0.120459	-0.426149	-0.474761	-0.478558	1.15599	1.13996	1.09274	-0.0663773	-0.133175	-0.189434	0.374346	0.414836	0.381055	0.529615	0.48635	0.510251	0.186304	0.164202	0.12457
2015.3	52.8226	0.0660551	0.0835561	0.0895355	0.167372	0.184985	0.228957	-0.275031	-0.173448	-0.153383	0.841572	1.33352	1.2847	0.517777	1.24129	2.39858	-0.532451	-0.451098	-0.476263	1.18578	1.24586	1.19592	0.0962891	0.0999651	0.0564867	0.474245	0.462366	0.419831	0.129078	0.134918	0.125145	-0.441337	-0.495279	-0.49462	1.12098	1.10264	1.05841	-0.0915372	-0.15783	-0.210526	0.374049	0.413683	0.380403	0.530939	0.489861	0.512023	0.189039	0.168155	0.12831
2018.51	52.8767	0.0666759	0.0883025	0.0927384	0.171143	0.19196	0.234273	-0.288179	-0.185703	-0.165939	0.835636	1.3182	1.26864	0.554101	1.27942	2.41554	-0.539773	-0.461328	-0.487489	1.15218	1.20768	1.15947	0.102665	0.103729	0.0615512	0.479093	0.465664	0.423659	0.134169	0.137781	0.129924	-0.45548	-0.514836	-0.509552	1.08703	1.06666	1.02537	-0.115578	-0.181052	-0.230481	0.373825	0.412847	0.379851	0.532239	0.493508	0.513943	0.191766	0.17212	0.132125
2021.75	52.9308	0.0675389	0.0931432	0.0957036	0.175173	0.199121	0.239388	-0.300689	-0.197237	-0.178182	0.830115	1.30326	1.25301	0.592282	1.31903	2.4324	-0.546249	-0.471296	-0.498041	1.1198	1.17033	1.12426	0.109166	0.107403	0.0670266	0.483763	0.468845	0.427608	0.13915	0.140584	0.134781	-0.468658	-0.533467	-0.523424	1.05412	1.03199	0.99358	-0.138507	-0.202897	-0.249335	0.37367	0.412321	0.379422	0.533522	0.497329	0.516024	0.194495	0.176097	0.136006
2025.05	52.9849	0.0686253	0.0980642	0.0984288	0.17944	0.206497	0.244302	-0.312577	-0.208061	-0.190097	0.824963	1.2887	1.23778	0.632362	1.36016	2.44915	-0.551952	-0.481031	-0.507965	1.08858	1.13379	1.09026	0.1158	0.111006	0.0728926	0.488265	0.4719	0.431662	0.144005	0.143325	0.139696	-0.480942	-0.551198	-0.536312	1.02221	0.998595	0.962985	-0.160326	-0.223424	-0.267127	0.37358	0.412094	0.379132	0.534807	0.501362	0.518279	0.197238	0.180082	0.139948
2028.44	53.0389	0.069915	0.103051	0.10092	0.183921	0.214113	0.249022	-0.323859	-0.218192	-0.201667	0.82013	1.27451	1.22294	0.674377	1.40286	2.46577	-0.55696	-0.490544	-0.517298	1.05846	1.09806	1.05741	0.12257	0.114562	0.0791213	0.492606	0.47482	0.435805	0.148723	0.146008	0.144641	-0.492392	-0.568048	-0.548288	0.991297	0.966446	0.933541	-0.181042	-0.242699	-0.283897	0.373553	0.412149	0.378995	0.536117	0.505637	0.520719	0.20001	0.184068	0.143942
2031.75	53.093	0.0713876	0.108086	0.103191	0.188596	0.221993	0.253557	-0.334554	-0.227659	-0.212874	0.815565	1.26069	1.20849	0.718351	1.44718	2.48225	-0.561353	-0.499834	-0.526076	1.02937	1.06315	1.02566	0.129473	0.118102	0.0856791	0.496794	0.477602	0.440016	0.153297	0.14864	0.149588	-0.503065	-0.584026	-0.559425	0.961356	0.935508	0.905195	-0.200661	-0.260791	-0.299689	0.373589	0.412467	0.379021	0.537483	0.510175	0.523349	0.202822	0.188047	0.147981
2034.93	53.1471	0.0730235	0.113155	0.105265	0.193443	0.230152	0.257922	-0.344676	-0.236496	-0.223705	0.811217	1.24724	1.19439	0.764301	1.49315	2.49859	-0.56521	-0.508885	-0.534328	1.00124	1.02907	0.994965	0.136501	0.121658	0.0925263	0.50083	0.480247	0.444272	0.157722	0.151233	0.154506	-0.513009	-0.599137	-0.56979	0.932381	0.905749	0.877891	-0.219194	-0.277772	-0.314553	0.373688	0.413026	0.37922	0.538936	0.514991	0.526176	0.205691	0.19201	0.152058
2038.15	53.2012	0.0748043	0.118242	0.107171	0.198446	0.238603	0.262137	-0.354246	-0.24475	-0.234145	0.807034	1.23413	1.18066	0.81224	1.54083	2.51476	-0.568608	-0.517673	-0.542078	0.974011	0.995832	0.965254	0.14364	0.125267	0.0996204	0.504711	0.482761	0.448547	0.161991	0.153803	0.159359	-0.522274	-0.613377	-0.579452	0.904362	0.877141	0.851574	-0.236658	-0.293712	-0.328538	0.373855	0.413804	0.379596	0.540511	0.520086	0.529198	0.208629	0.195945	0.156167
2041.38	53.2552	0.0767153	0.123334	0.108943	0.203594	0.247358	0.266227	-0.363281	-0.252475	-0.24419	0.802967	1.22133	1.16727	0.862174	1.59025	2.53075	-0.571621	-0.526168	-0.549346	0.947603	0.963454	0.936474	0.150868	0.128965	0.106915	0.50843	0.485159	0.452821	0.166104	0.156368	0.164115	-0.530905	-0.62674	-0.588477	0.877289	0.849658	0.82619	-0.253078	-0.308679	-0.3417	0.374097	0.414777	0.380152	0.542243	0.525456	0.532414	0.211649	0.199841	0.1603
2044.64	53.3093	0.0787475	0.128422	0.110616	0.208877	0.256423	0.270223	-0.371801	-0.259735	-0.253842	0.798966	1.20883	1.15423	0.914109	1.64145	2.54655	-0.574316	-0.534337	-0.556144	0.921944	0.93195	0.908569	0.158158	0.132789	0.114366	0.511977	0.48746	0.457072	0.170057	0.158947	0.168739	-0.538948	-0.639218	-0.596926	0.851147	0.823277	0.801681	-0.26849	-0.322734	-0.354096	0.374422	0.415927	0.380889	0.544166	0.531087	0.535816	0.214758	0.203685	0.164452
2047.87	53.3634	0.0808984	0.133502	0.112225	0.214291	0.265799	0.274156	-0.379823	-0.266602	-0.263115	0.794986	1.19659	1.14154	0.968052	1.69448	2.56216	-0.576749	-0.542148	-0.562486	0.896968	0.901327	0.881483	0.165479	0.136771	0.121927	0.515337	0.489688	0.461282	0.173851	0.161566	0.173203	-0.546448	-0.650806	-0.604855	0.825913	0.797972	0.777992	-0.282937	-0.335937	-0.365787	0.374845	0.417236	0.381805	0.546314	0.536959	0.539394	0.217962	0.207468	0.168615
2051.14	53.4174	0.0831725	0.138569	0.113801	0.219836	0.275484	0.278057	-0.387369	-0.273151	-0.272028	0.790984	1.18458	1.1292	1.02401	1.74937	2.57755	-0.578966	-0.549574	-0.568378	0.87261	0.871585	0.85516	0.172794	0.14094	0.129558	0.518498	0.491869	0.465436	0.177486	0.164249	0.17748	-0.55345	-0.661496	-0.612311	0.801557	0.773719	0.755066	-0.296474	-0.348341	-0.376837	0.375376	0.41869	0.382892	0.548718	0.543048	0.543135	0.22126	0.211182	0.172783
2054.32	53.4715	0.085581	0.14362	0.115372	0.225513	0.285466	0.281958	-0.394457	-0.279459	-0.280612	0.786921	1.17277	1.11721	1.08199	1.80615	2.59272	-0.580999	-0.556594	-0.573828	0.848814	0.842718	0.829542	0.18007	0.14532	0.137221	0.521449	0.494032	0.469525	0.180966	0.16702	0.181554	-0.559998	-0.671286	-0.61933	0.778042	0.750487	0.732848	-0.309163	-0.359992	-0.387312	0.37603	0.420279	0.384139	0.551409	0.549327	0.547023	0.224652	0.214825	0.176949
2057.54	53.5256	0.0881413	0.148656	0.116957	0.231332	0.295727	0.285881	-0.401105	-0.285607	-0.288898	0.782764	1.16113	1.10556	1.14202	1.86486	2.60765	-0.582865	-0.563194	-0.578842	0.82553	0.814708	0.804573	0.187271	0.149925	0.144883	0.524176	0.496203	0.47354	0.184294	0.169905	0.185413	-0.56613	-0.680177	-0.62594	0.755324	0.728241	0.711289	-0.321076	-0.370934	-0.397274	0.376816	0.421996	0.385528	0.55441	0.555768	0.551041	0.228133	0.2184	0.181106
2060.75	53.5797	0.0908759	0.153677	0.118566	0.237304	0.306241	0.289846	-0.407329	-0.291667	-0.296923	0.77849	1.14963	1.09425	1.20411	1.92554	2.62234	-0.58457	-0.569369	-0.583423	0.802717	0.787533	0.780198	0.194363	0.154767	0.152515	0.526669	0.498403	0.477477	0.187475	0.172923	0.189056	-0.57188	-0.688176	-0.632162	0.733354	0.706944	0.690345	-0.332288	-0.3812	-0.406779	0.377745	0.423836	0.387037	0.557741	0.562348	0.555166	0.2317	0.221915	0.185248
2064	53.6337	0.0938108	0.158684	0.120203	0.243446	0.316977	0.293861	-0.413141	-0.29771	-0.304722	0.774078	1.13824	1.08328	1.26828	1.98821	2.63678	-0.586113	-0.575123	-0.587578	0.780341	0.761166	0.756362	0.201318	0.159852	0.160098	0.528918	0.50065	0.481334	0.190515	0.176091	0.192485	-0.577281	-0.695295	-0.638015	0.712076	0.686557	0.669981	-0.342876	-0.39082	-0.415874	0.378823	0.425798	0.388641	0.561414	0.569047	0.559376	0.235343	0.22538	0.189371
2067.22	53.6878	0.0969727	0.163681	0.121857	0.249776	0.3279	0.297926	-0.41855	-0.303795	-0.312331	0.769517	1.12693	1.07263	1.33457	2.05292	2.65094	-0.587486	-0.58047	-0.591309	0.758377	0.735574	0.733016	0.208108	0.165184	0.16762	0.530918	0.502955	0.48511	0.193419	0.179416	0.195711	-0.58236	-0.701556	-0.643514	0.691434	0.667038	0.650165	-0.352916	-0.399819	-0.424592	0.380059	0.42788	0.390315	0.565432	0.575846	0.563647	0.239055	0.228804	0.193469
2070.49	53.7419	0.100386	0.168671	0.123515	0.256312	0.338972	0.30203	-0.423567	-0.309976	-0.319783	0.7648	1.11569	1.0623	1.40301	2.11969	2.66483	-0.58868	-0.585433	-0.594624	0.736805	0.71072	0.710115	0.214712	0.170761	0.175079	0.532666	0.505325	0.48881	0.19619	0.1829	0.198749	-0.58714	-0.706986	-0.648668	0.671368	0.648346	0.630876	-0.362482	-0.408217	-0.432957	0.381456	0.43008	0.392035	0.569791	0.582729	0.567961	0.24282	0.232201	0.197538
2073.76	53.796	0.104069	0.173656	0.125159	0.263069	0.350154	0.306155	-0.428203	-0.316296	-0.327105	0.759923	1.1045	1.05229	1.47365	2.18854	2.67843	-0.589684	-0.590042	-0.597531	0.715612	0.68656	0.687619	0.221117	0.176576	0.182477	0.534162	0.507765	0.492439	0.198829	0.186535	0.20162	-0.591641	-0.711622	-0.653485	0.651818	0.63043	0.612095	-0.371641	-0.416036	-0.440978	0.383018	0.432394	0.393782	0.574482	0.589679	0.5723	0.246622	0.235582	0.201572
2077.05	53.85	0.108038	0.178636	0.126766	0.270058	0.3614	0.310277	-0.43247	-0.322789	-0.334321	0.75489	1.09334	1.04259	1.54653	2.25949	2.69173	-0.590485	-0.594331	-0.600043	0.694789	0.66305	0.665497	0.22732	0.18262	0.189823	0.535416	0.510272	0.496003	0.201335	0.190306	0.204349	-0.595876	-0.715504	-0.657966	0.632729	0.613239	0.593809	-0.380457	-0.423297	-0.448659	0.38474	0.434817	0.395541	0.579487	0.596685	0.576655	0.250438	0.238958	0.205564
2080.15	53.9041	0.112299	0.18361	0.128316	0.277284	0.372664	0.314364	-0.436381	-0.329478	-0.341447	0.7497	1.08221	1.03319	1.62169	2.33256	2.70472	-0.591069	-0.598336	-0.602179	0.674331	0.640142	0.643725	0.233326	0.188875	0.197128	0.53644	0.512843	0.499509	0.203708	0.19419	0.206964	-0.599856	-0.718681	-0.662109	0.614053	0.596717	0.576007	-0.388982	-0.430026	-0.455998	0.386615	0.437343	0.397305	0.584788	0.603732	0.581019	0.254242	0.242337	0.209507
2083.25	53.9582	0.116854	0.188572	0.129785	0.284745	0.3839	0.318383	-0.439954	-0.336379	-0.348491	0.744355	1.07111	1.02409	1.69917	2.40775	2.7174	-0.591425	-0.602092	-0.603962	0.654233	0.617792	0.622285	0.23915	0.195319	0.204403	0.537254	0.515466	0.502959	0.205948	0.198159	0.209492	-0.603584	-0.721199	-0.665904	0.595748	0.580806	0.558681	-0.397259	-0.436255	-0.462989	0.388633	0.439962	0.399068	0.59036	0.610807	0.585395	0.258008	0.245728	0.213391
2086.59	54.0123	0.121696	0.193517	0.13115	0.292429	0.395062	0.322298	-0.443204	-0.343496	-0.355457	0.738854	1.06004	1.01527	1.77903	2.48507	2.72975	-0.591544	-0.60563	-0.605423	0.634496	0.595956	0.601165	0.244812	0.201929	0.21166	0.537881	0.518129	0.50635	0.208057	0.202179	0.211962	-0.607054	-0.723113	-0.669342	0.577786	0.565445	0.541826	-0.405316	-0.442015	-0.469624	0.390777	0.442667	0.40083	0.596177	0.617894	0.589788	0.261707	0.249132	0.217207
2089.9	54.0663	0.126809	0.198435	0.132393	0.30032	0.406108	0.326073	-0.446151	-0.350822	-0.362335	0.733192	1.04901	1.00674	1.86127	2.56451	2.74177	-0.591429	-0.608978	-0.606597	0.615119	0.574599	0.58036	0.250339	0.20868	0.218912	0.538349	0.520811	0.509675	0.21004	0.206215	0.214398	-0.61026	-0.724475	-0.672411	0.560144	0.550576	0.525437	-0.413166	-0.447341	-0.475896	0.393031	0.445446	0.402594	0.602208	0.62498	0.594209	0.265312	0.252549	0.220945
2093.15	54.1204	0.13217	0.203309	0.133498	0.308396	0.416998	0.329678	-0.448817	-0.358339	-0.369111	0.72736	1.03803	0.998471	1.94593	2.64609	2.75345	-0.59109	-0.612161	-0.60752	0.596102	0.55369	0.559867	0.255761	0.215546	0.22617	0.538684	0.523494	0.512921	0.211903	0.210225	0.216819	-0.613188	-0.72534	-0.6751	0.542814	0.536138	0.50951	-0.420805	-0.45227	-0.4818	0.395376	0.448287	0.40437	0.608424	0.632049	0.598673	0.268794	0.255971	0.224592
2096.37	54.1745	0.137747	0.208122	0.134458	0.316628	0.427692	0.333088	-0.451225	-0.366019	-0.375762	0.721346	1.0271	0.990457	2.03302	2.72981	2.76477	-0.590548	-0.615197	-0.608233	0.577447	0.533206	0.539687	0.261111	0.222505	0.233444	0.538914	0.526155	0.516074	0.213657	0.214169	0.219239	-0.615824	-0.725759	-0.677398	0.525793	0.522075	0.494041	-0.428216	-0.456835	-0.487331	0.397795	0.451178	0.40617	0.614796	0.639089	0.603197	0.272129	0.259382	0.228139
2099.7	54.2286	0.143507	0.212853	0.135273	0.324986	0.438155	0.336285	-0.453399	-0.373829	-0.382263	0.715137	1.01624	0.982689	2.12253	2.81566	2.77573	-0.589834	-0.618096	-0.608777	0.559151	0.513126	0.519821	0.266425	0.229536	0.240739	0.539066	0.528778	0.519117	0.215314	0.218002	0.221666	-0.618151	-0.725781	-0.679302	0.509092	0.50833	0.47902	-0.435373	-0.46107	-0.492486	0.40027	0.454103	0.408013	0.621298	0.646092	0.607804	0.275295	0.262757	0.231572
2103.02	54.2826	0.149411	0.217478	0.135954	0.333433	0.448351	0.339257	-0.455365	-0.38173	-0.388584	0.708715	1.00547	0.975158	2.21446	2.90364	2.78632	-0.588987	-0.62086	-0.609192	0.541211	0.493436	0.500268	0.271732	0.236625	0.248055	0.539165	0.531345	0.522033	0.216891	0.221681	0.224103	-0.620149	-0.725448	-0.680809	0.492724	0.494853	0.464434	-0.442241	-0.465007	-0.497268	0.402783	0.457047	0.409919	0.627905	0.653046	0.612518	0.278269	0.266064	0.234879
2106.26	54.3367	0.155421	0.221974	0.13652	0.34193	0.458248	0.342003	-0.457144	-0.389685	-0.394697	0.70206	0.994787	0.96786	2.30878	2.99376	2.79654	-0.588047	-0.623486	-0.60951	0.52362	0.474124	0.481028	0.277061	0.243759	0.255388	0.539231	0.533848	0.524803	0.218404	0.22517	0.226545	-0.621801	-0.724796	-0.681924	0.476714	0.481599	0.450259	-0.448784	-0.468674	-0.501686	0.40532	0.459995	0.411911	0.634596	0.659941	0.617364	0.281034	0.269268	0.238048
2109.43	54.3908	0.161499	0.226317	0.136998	0.350434	0.467814	0.344526	-0.458759	-0.397654	-0.400574	0.695152	0.984223	0.960789	2.40547	3.086	2.80637	-0.587056	-0.625964	-0.609759	0.506369	0.455182	0.462101	0.282431	0.250932	0.262731	0.539285	0.536278	0.527409	0.219868	0.228435	0.228983	-0.623088	-0.723856	-0.682659	0.461085	0.468528	0.436463	-0.454964	-0.472098	-0.505761	0.407867	0.462932	0.414009	0.641352	0.666761	0.622364	0.283574	0.272329	0.241065
2112.6	54.4448	0.167609	0.230484	0.137422	0.358899	0.477018	0.346841	-0.460231	-0.405603	-0.406188	0.687969	0.973789	0.95394	2.50448	3.18036	2.81581	-0.586054	-0.628283	-0.609958	0.489443	0.436604	0.443488	0.287859	0.25814	0.270074	0.53934	0.53863	0.529836	0.221301	0.231455	0.231402	-0.623992	-0.722652	-0.683028	0.445864	0.455608	0.423005	-0.46074	-0.475298	-0.509518	0.410413	0.465848	0.416228	0.648157	0.673485	0.627535	0.285879	0.275213	0.243918
2115.78	54.4989	0.173716	0.234449	0.13783	0.367283	0.485832	0.348969	-0.461578	-0.413496	-0.411513	0.680487	0.963499	0.947307	2.60578	3.27683	2.82486	-0.585075	-0.63043	-0.610121	0.472828	0.41839	0.425191	0.293349	0.265384	0.277406	0.539405	0.540904	0.532071	0.222718	0.234214	0.233787	-0.6245	-0.721203	-0.683051	0.431073	0.44281	0.409839	-0.466074	-0.478286	-0.51299	0.41295	0.468734	0.418578	0.654999	0.68009	0.632892	0.287942	0.277884	0.246593
2119.04	54.553	0.17979	0.23819	0.138262	0.375544	0.494228	0.350936	-0.462815	-0.421302	-0.416526	0.672686	0.953365	0.940882	2.70929	3.37539	2.8335	-0.58415	-0.632393	-0.610252	0.456507	0.400542	0.407212	0.298903	0.272666	0.284714	0.539483	0.543101	0.534105	0.224131	0.236709	0.236114	-0.624598	-0.719525	-0.682759	0.416728	0.430112	0.396912	-0.47093	-0.481067	-0.516209	0.415474	0.471582	0.421063	0.661866	0.686552	0.638442	0.289761	0.280312	0.249078
2122.31	54.6071	0.185808	0.241685	0.138757	0.383645	0.50218	0.352774	-0.463954	-0.428993	-0.421204	0.664546	0.943394	0.93466	2.81498	3.47603	2.84172	-0.583304	-0.634162	-0.610348	0.440461	0.383064	0.389552	0.304514	0.279996	0.291986	0.539574	0.545225	0.535936	0.225553	0.238941	0.238361	-0.624283	-0.717632	-0.682184	0.402839	0.417499	0.384171	-0.47528	-0.483637	-0.519212	0.417985	0.474386	0.423678	0.66875	0.692852	0.644182	0.291338	0.282467	0.251361
2125.61	54.6611	0.191753	0.244914	0.139351	0.391548	0.509665	0.354513	-0.465003	-0.43654	-0.425532	0.656047	0.933594	0.928638	2.92278	3.57873	2.84954	-0.582557	-0.635728	-0.6104	0.42467	0.365962	0.372212	0.310169	0.28738	0.299211	0.53967	0.547282	0.537565	0.226993	0.240923	0.240505	-0.623555	-0.715534	-0.681371	0.3894	0.404965	0.371559	-0.479108	-0.485985	-0.522031	0.420487	0.477144	0.426414	0.675643	0.698972	0.650106	0.292682	0.284326	0.253431
2128.85	54.7152	0.197617	0.247865	0.140075	0.399219	0.516663	0.356183	-0.465964	-0.443918	-0.429499	0.647174	0.923967	0.922813	3.03262	3.68347	2.85692	-0.581922	-0.637081	-0.610392	0.409109	0.349242	0.355193	0.315852	0.294829	0.306385	0.539764	0.549284	0.538998	0.228457	0.242671	0.242524	-0.62242	-0.713241	-0.680361	0.376395	0.392508	0.35902	-0.482408	-0.488092	-0.524698	0.422984	0.479852	0.429256	0.682536	0.704899	0.656198	0.293801	0.285877	0.255281
2132.13	54.7693	0.203395	0.250528	0.140957	0.406626	0.523156	0.35781	-0.466839	-0.451102	-0.433103	0.637913	0.914514	0.917189	3.14446	3.79022	2.86388	-0.581406	-0.638217	-0.6103	0.393757	0.332905	0.338493	0.321543	0.302355	0.313504	0.539847	0.551239	0.540246	0.229948	0.244209	0.244402	-0.620893	-0.710756	-0.679201	0.363792	0.380132	0.346501	-0.485189	-0.489935	-0.527245	0.425483	0.482509	0.432182	0.689422	0.710622	0.662435	0.29471	0.287112	0.256902
2135.35	54.8234	0.209088	0.252898	0.142016	0.41374	0.529127	0.359413	-0.467622	-0.458067	-0.436344	0.628255	0.905231	0.911765	3.25822	3.89894	2.87041	-0.581004	-0.639134	-0.610097	0.378592	0.316952	0.322113	0.327223	0.309965	0.320572	0.539907	0.553158	0.541327	0.23146	0.245563	0.246125	-0.618992	-0.708085	-0.677935	0.351554	0.367844	0.333954	-0.487469	-0.491486	-0.5297	0.427989	0.485114	0.435168	0.696293	0.716128	0.66879	0.295422	0.288036	0.258289
2138.59	54.8774	0.2147	0.254975	0.143266	0.420533	0.534564	0.361009	-0.468307	-0.46479	-0.439229	0.618197	0.896112	0.906544	3.37386	4.0096	2.87649	-0.580707	-0.639834	-0.609753	0.363595	0.30138	0.306052	0.332877	0.317662	0.327595	0.539935	0.555051	0.542261	0.232987	0.246761	0.247685	-0.616744	-0.705229	-0.6766	0.339633	0.355651	0.321341	-0.489271	-0.492714	-0.532086	0.430507	0.487667	0.438186	0.703139	0.721409	0.675234	0.295955	0.288661	0.259438
2141.85	54.9315	0.220233	0.256766	0.144711	0.426981	0.539456	0.362606	-0.468883	-0.471242	-0.441769	0.607739	0.88715	0.901521	3.49132	4.12214	2.88213	-0.580494	-0.640322	-0.609244	0.348747	0.286182	0.290313	0.338492	0.325448	0.334583	0.539925	0.556924	0.543071	0.234517	0.247832	0.249078	-0.614183	-0.702193	-0.675231	0.327973	0.343558	0.308631	-0.490625	-0.493592	-0.534422	0.433043	0.490167	0.441209	0.709947	0.726452	0.681735	0.296327	0.289008	0.260346
2145.14	54.9856	0.22569	0.258281	0.146348	0.433059	0.543804	0.364204	-0.469337	-0.477398	-0.443979	0.596891	0.878337	0.896689	3.61054	4.23653	2.88732	-0.580344	-0.64061	-0.608545	0.334034	0.271351	0.274901	0.34406	0.333318	0.341547	0.539871	0.558781	0.543782	0.236037	0.248805	0.250305	-0.611348	-0.698982	-0.673853	0.316513	0.33157	0.295808	-0.491563	-0.494093	-0.53672	0.435597	0.492618	0.444207	0.716701	0.731246	0.688258	0.296555	0.289106	0.261012
2148.34	55.0397	0.231068	0.25954	0.148167	0.438744	0.547614	0.365798	-0.469656	-0.48323	-0.445879	0.585668	0.869667	0.892036	3.7315	4.3527	2.89206	-0.58023	-0.640709	-0.60764	0.319444	0.256875	0.259819	0.349578	0.341266	0.348503	0.539774	0.560624	0.544419	0.237533	0.249706	0.251373	-0.608287	-0.695605	-0.672487	0.305188	0.319692	0.282867	-0.492119	-0.494196	-0.538984	0.438173	0.495025	0.447155	0.723383	0.73578	0.694766	0.296657	0.288987	0.261434
2151.59	55.0937	0.236361	0.260565	0.150154	0.444016	0.550903	0.367375	-0.469829	-0.488711	-0.447491	0.574092	0.861132	0.887546	3.85415	4.47059	2.89634	-0.580125	-0.640635	-0.606518	0.30497	0.242741	0.245071	0.355048	0.349281	0.355471	0.539641	0.56245	0.545004	0.238992	0.250559	0.252294	-0.605046	-0.692073	-0.671144	0.293932	0.307921	0.269818	-0.492329	-0.493887	-0.541211	0.440771	0.497394	0.450032	0.729978	0.740045	0.701223	0.296644	0.288685	0.261612
2154.85	55.1478	0.241554	0.261385	0.15229	0.448852	0.553693	0.368918	-0.46985	-0.493814	-0.448836	0.562195	0.852726	0.883197	3.97846	4.59013	2.90016	-0.58	-0.640397	-0.605177	0.290609	0.228929	0.230657	0.360482	0.357354	0.362468	0.539483	0.564252	0.545561	0.240401	0.251378	0.253082	-0.601675	-0.688395	-0.669828	0.282679	0.296251	0.256677	-0.492229	-0.493165	-0.543389	0.443393	0.499727	0.452822	0.736466	0.744037	0.707595	0.296524	0.288233	0.261548
2158.15	55.2019	0.246628	0.262035	0.154558	0.453228	0.556012	0.370408	-0.469717	-0.498515	-0.449935	0.550011	0.844445	0.878958	4.10441	4.71127	2.90352	-0.579827	-0.640003	-0.603629	0.276359	0.215418	0.216575	0.365899	0.365469	0.369513	0.53932	0.566025	0.546112	0.241751	0.252171	0.253759	-0.598217	-0.684582	-0.668533	0.271375	0.284668	0.243471	-0.491855	-0.492039	-0.545498	0.446033	0.502028	0.45552	0.742829	0.747759	0.713849	0.296303	0.287658	0.261244
2161.34	55.2559	0.251561	0.262554	0.156938	0.457121	0.557891	0.371817	-0.46943	-0.502788	-0.450808	0.537581	0.836288	0.874793	4.23197	4.83391	2.9064	-0.57958	-0.639451	-0.601892	0.262222	0.202184	0.202815	0.371327	0.373614	0.376618	0.539175	0.567761	0.546673	0.243033	0.252937	0.254348	-0.594713	-0.680643	-0.667244	0.259972	0.273153	0.230231	-0.491243	-0.490531	-0.547512	0.448686	0.504299	0.458125	0.749049	0.751214	0.719961	0.295977	0.286986	0.260706
2164.59	55.31	0.256323	0.262984	0.159409	0.460504	0.559368	0.373116	-0.468992	-0.506613	-0.451472	0.524947	0.828251	0.870657	4.3611	4.95798	2.90881	-0.579234	-0.638736	-0.599993	0.2482	0.189201	0.189364	0.376801	0.381774	0.383789	0.539075	0.569453	0.547257	0.244242	0.25367	0.254878	-0.591199	-0.676584	-0.66594	0.248437	0.261682	0.216994	-0.490425	-0.488672	-0.549401	0.451337	0.506543	0.460645	0.755102	0.754414	0.72591	0.295541	0.286235	0.25994
2167.76	55.3641	0.260886	0.26337	0.161955	0.46335	0.560482	0.374277	-0.468408	-0.509968	-0.451946	0.512155	0.820335	0.866501	4.49178	5.0834	2.91075	-0.578768	-0.637845	-0.597966	0.234297	0.176446	0.176207	0.38236	0.389936	0.391032	0.539053	0.571092	0.547871	0.245377	0.254357	0.255376	-0.587704	-0.67241	-0.664596	0.236748	0.250227	0.203795	-0.489428	-0.486504	-0.551132	0.453975	0.508765	0.463091	0.760969	0.757371	0.731678	0.294988	0.285422	0.258955
2170.98	55.4182	0.265212	0.263758	0.164561	0.465633	0.561275	0.375273	-0.467682	-0.512838	-0.452243	0.499246	0.812536	0.862275	4.62395	5.21006	2.91221	-0.578161	-0.636766	-0.595847	0.220517	0.163896	0.163323	0.388045	0.398089	0.398346	0.539143	0.572673	0.548514	0.246439	0.254986	0.255872	-0.584252	-0.668125	-0.663182	0.224899	0.238758	0.190671	-0.48827	-0.484073	-0.55267	0.456585	0.510972	0.465483	0.766626	0.760106	0.737253	0.294307	0.284555	0.257761
2174.19	55.4722	0.269265	0.264192	0.167218	0.467328	0.561789	0.376084	-0.466819	-0.515214	-0.452378	0.486263	0.804852	0.857924	4.75757	5.3379	2.91319	-0.577399	-0.635482	-0.593678	0.206867	0.151533	0.150687	0.393901	0.406223	0.40573	0.539378	0.574187	0.549183	0.247435	0.255541	0.25639	-0.58086	-0.663735	-0.661668	0.212897	0.227241	0.177651	-0.486962	-0.48143	-0.553979	0.45916	0.51317	0.467841	0.772055	0.76264	0.742626	0.293488	0.283633	0.256368
2177.42	55.5263	0.273008	0.264713	0.16992	0.468413	0.562062	0.376695	-0.465828	-0.517094	-0.452361	0.473247	0.797281	0.853397	4.89259	5.46681	2.91369	-0.576471	-0.633973	-0.591499	0.193352	0.139336	0.138269	0.399971	0.414331	0.41318	0.539796	0.575633	0.549873	0.248376	0.256008	0.256951	-0.577536	-0.659247	-0.660025	0.20076	0.21564	0.164762	-0.485505	-0.478631	-0.555025	0.461692	0.515369	0.470193	0.777241	0.764999	0.747792	0.292522	0.282648	0.25479
2180.66	55.5804	0.276406	0.265353	0.172671	0.468871	0.562129	0.377099	-0.464713	-0.518483	-0.4522	0.460238	0.789821	0.848646	5.02894	5.5967	2.9137	-0.57537	-0.632214	-0.58935	0.179977	0.127292	0.126031	0.406295	0.422413	0.420686	0.540427	0.57701	0.550577	0.249279	0.256369	0.257571	-0.574282	-0.654668	-0.658227	0.188514	0.203917	0.152021	-0.4839	-0.475735	-0.55578	0.464177	0.517573	0.472571	0.782172	0.767214	0.752751	0.2914	0.281586	0.253036
2183.89	55.6345	0.279429	0.266142	0.17548	0.468689	0.562014	0.377297	-0.463482	-0.519395	-0.451899	0.447277	0.782471	0.843627	5.16655	5.72749	2.91322	-0.574092	-0.630176	-0.587265	0.166739	0.115385	0.113932	0.41291	0.430472	0.428234	0.541301	0.578322	0.551284	0.250161	0.256614	0.258264	-0.57109	-0.650008	-0.656251	0.176193	0.192037	0.139437	-0.482145	-0.472796	-0.556223	0.466615	0.519789	0.475007	0.786838	0.76932	0.757503	0.290116	0.280427	0.25112
2187.18	55.6885	0.282054	0.267103	0.178362	0.467857	0.561736	0.377296	-0.462138	-0.519851	-0.451457	0.434402	0.775225	0.838306	5.30535	5.85909	2.91226	-0.572638	-0.627828	-0.585273	0.153633	0.103604	0.101932	0.419848	0.438516	0.43581	0.54244	0.579579	0.551986	0.251044	0.256731	0.259043	-0.567948	-0.645277	-0.654079	0.163831	0.17997	0.127012	-0.480235	-0.469867	-0.556341	0.469006	0.522017	0.477535	0.791234	0.771357	0.762047	0.288666	0.279147	0.249053
2190.43	55.7426	0.284267	0.268252	0.181333	0.46637	0.561303	0.377109	-0.460685	-0.519878	-0.450873	0.421654	0.768077	0.832654	5.44525	5.99139	2.9108	-0.571008	-0.625143	-0.583394	0.140648	0.0919402	0.0899884	0.427131	0.446562	0.443397	0.54386	0.580793	0.552672	0.251946	0.256716	0.259915	-0.564838	-0.640483	-0.651696	0.151464	0.167691	0.114742	-0.478165	-0.466992	-0.55613	0.471352	0.524259	0.480188	0.795355	0.773367	0.766387	0.287046	0.277723	0.246851
2193.71	55.7967	0.286063	0.269601	0.184415	0.464232	0.560716	0.376753	-0.45912	-0.519509	-0.45014	0.409071	0.761014	0.826651	5.58616	6.12432	2.90885	-0.569206	-0.622095	-0.58164	0.127776	0.0803856	0.0780657	0.434774	0.454626	0.450981	0.545568	0.581977	0.553335	0.252883	0.256565	0.260888	-0.56174	-0.635635	-0.649097	0.13913	0.155184	0.102614	-0.475924	-0.464205	-0.555595	0.473658	0.52651	0.482991	0.799202	0.775387	0.770522	0.285257	0.276132	0.244524
2196.95	55.8508	0.287446	0.271155	0.187628	0.461456	0.559963	0.376251	-0.457439	-0.518781	-0.449247	0.39669	0.754022	0.820283	5.72798	6.25778	2.90641	-0.567238	-0.61867	-0.580015	0.115007	0.0689375	0.0661301	0.442781	0.462729	0.458553	0.547564	0.58315	0.553971	0.253869	0.256282	0.261962	-0.558637	-0.630739	-0.646283	0.126864	0.14244	0.0906146	-0.473498	-0.461524	-0.55475	0.475932	0.528769	0.485967	0.80278	0.777456	0.774457	0.283302	0.274351	0.242088
2200.2	55.9048	0.288427	0.272909	0.190986	0.458065	0.559028	0.375627	-0.455634	-0.517733	-0.448181	0.384546	0.74708	0.813545	5.87061	6.39168	2.90347	-0.565113	-0.614861	-0.578509	0.102331	0.0575966	0.0541545	0.451151	0.470892	0.466108	0.549837	0.584333	0.55458	0.254916	0.255876	0.263132	-0.555512	-0.625802	-0.643262	0.114699	0.129461	0.0787238	-0.47087	-0.458955	-0.553613	0.478185	0.531033	0.489131	0.806095	0.779605	0.778191	0.281187	0.27236	0.239556
2203.4	55.9589	0.289029	0.274854	0.194505	0.454092	0.557885	0.374902	-0.453693	-0.516404	-0.446924	0.372673	0.740166	0.806439	6.01393	6.52592	2.90004	-0.562841	-0.610675	-0.577105	0.0897405	0.0463664	0.0421185	0.45987	0.479136	0.473646	0.552372	0.585547	0.555168	0.25603	0.255361	0.26439	-0.552353	-0.620828	-0.640045	0.102659	0.116254	0.0669225	-0.468023	-0.456492	-0.552211	0.480429	0.5333	0.492489	0.809158	0.781863	0.781724	0.278926	0.270146	0.236942
2206.71	56.013	0.289283	0.276976	0.198194	0.44958	0.556503	0.374096	-0.451606	-0.514833	-0.445459	0.361099	0.733252	0.798977	6.15786	6.66042	2.89611	-0.560431	-0.60613	-0.57577	0.0772282	0.0352506	0.0300089	0.46892	0.487484	0.481174	0.555146	0.586815	0.555748	0.257215	0.25476	0.265725	-0.549148	-0.615823	-0.63665	0.0907651	0.102841	0.0551918	-0.464946	-0.454117	-0.550567	0.48268	0.535576	0.496043	0.81198	0.784253	0.785049	0.276536	0.267697	0.234261
2209.99	56.0671	0.289232	0.279257	0.202057	0.444576	0.554845	0.373224	-0.449357	-0.513057	-0.44377	0.349854	0.726311	0.791176	6.30228	6.79507	2.89168	-0.557891	-0.601253	-0.574463	0.0647894	0.0242523	0.0178206	0.478272	0.495955	0.488707	0.558133	0.588158	0.556335	0.258472	0.254099	0.267127	-0.545891	-0.610785	-0.633095	0.0790277	0.0892499	0.0435135	-0.461635	-0.451803	-0.548709	0.484952	0.537868	0.499783	0.814579	0.786792	0.78816	0.274034	0.265013	0.231529
2213.27	56.1211	0.288928	0.281679	0.206096	0.439134	0.552875	0.372298	-0.446933	-0.511106	-0.441843	0.338961	0.719311	0.783059	6.44708	6.92978	2.88675	-0.555224	-0.596079	-0.573137	0.0524217	0.0133732	0.00555809	0.487894	0.504569	0.496268	0.561304	0.589592	0.556948	0.259795	0.253405	0.268585	-0.542574	-0.605714	-0.6294	0.0674516	0.0755182	0.0318713	-0.458096	-0.449517	-0.546661	0.487263	0.540184	0.503697	0.816968	0.789487	0.791044	0.271441	0.262097	0.22876
2216.5	56.1752	0.28843	0.284223	0.210306	0.433313	0.550555	0.371319	-0.444316	-0.509004	-0.439668	0.328442	0.712221	0.774649	6.59216	7.06443	2.88133	-0.552435	-0.590649	-0.571739	0.0401246	0.00261203	-0.00676391	0.497751	0.513341	0.503886	0.56463	0.591132	0.557615	0.261174	0.252707	0.270088	-0.539193	-0.600601	-0.625578	0.0560348	0.0616886	0.0202527	-0.454343	-0.447215	-0.544451	0.48963	0.542537	0.507761	0.819164	0.792337	0.793688	0.268775	0.25896	0.225965
2219.68	56.2293	0.287803	0.286876	0.214679	0.42717	0.54785	0.370282	-0.441494	-0.506771	-0.437242	0.318313	0.705009	0.765972	6.7374	7.19889	2.8754	-0.549522	-0.585013	-0.570217	0.0278998	-0.00803408	-0.0191192	0.507804	0.522284	0.511595	0.568085	0.592791	0.558363	0.262594	0.25203	0.271631	-0.535743	-0.595439	-0.62164	0.0447683	0.0478071	0.00865165	-0.450396	-0.444854	-0.542101	0.492067	0.54494	0.511951	0.821179	0.795327	0.796075	0.266052	0.255621	0.223155
2222.78	56.2833	0.287114	0.289622	0.219198	0.420769	0.54473	0.369172	-0.438451	-0.50442	-0.434567	0.308587	0.697642	0.75705	6.88269	7.33305	2.86898	-0.546483	-0.579222	-0.568521	0.0157532	-0.01857	-0.0314716	0.518014	0.531407	0.519432	0.57164	0.594576	0.559227	0.264039	0.251398	0.273211	-0.532225	-0.590214	-0.617592	0.0336369	0.0339211	-0.00292965	-0.446282	-0.442385	-0.53963	0.494592	0.547409	0.516237	0.823021	0.798432	0.79819	0.263286	0.252107	0.22034
2226.01	56.3374	0.286431	0.292455	0.223845	0.414169	0.54117	0.367971	-0.435176	-0.501955	-0.431652	0.299268	0.690091	0.747904	7.02789	7.46677	2.86205	-0.543314	-0.573333	-0.566607	0.0036962	-0.0290017	-0.043777	0.528345	0.540712	0.52744	0.575274	0.596493	0.560239	0.265491	0.250832	0.274827	-0.528642	-0.584913	-0.613436	0.0226201	0.0200779	-0.0144804	-0.442034	-0.439762	-0.537053	0.497219	0.549964	0.520587	0.824695	0.801621	0.800019	0.260488	0.248449	0.217526
2229.31	56.3915	0.285819	0.29537	0.228598	0.407434	0.537155	0.366651	-0.431663	-0.499377	-0.428513	0.290359	0.682326	0.738552	7.17289	7.5999	2.85463	-0.540009	-0.567403	-0.564437	-0.00825353	-0.0393368	-0.055986	0.538764	0.550199	0.535664	0.578966	0.598546	0.561434	0.266935	0.25035	0.276483	-0.525	-0.579518	-0.609171	0.0116946	0.00632291	-0.0259834	-0.43769	-0.436939	-0.534378	0.499965	0.552626	0.524973	0.8262	0.804856	0.801551	0.257667	0.244681	0.214721
2232.66	56.4456	0.285339	0.298371	0.233432	0.400619	0.532673	0.365185	-0.427906	-0.496678	-0.425172	0.281853	0.674325	0.729007	7.31756	7.73232	2.84671	-0.536561	-0.561487	-0.561983	-0.0200723	-0.049583	-0.0680483	0.549245	0.55986	0.544149	0.582703	0.600736	0.562845	0.268355	0.249968	0.278185	-0.521303	-0.574009	-0.604795	0.000835445	-0.00730237	-0.0374161	-0.43329	-0.433881	-0.531611	0.502846	0.555416	0.529367	0.827537	0.808093	0.802777	0.254829	0.24084	0.211931
2235.96	56.4996	0.285049	0.301469	0.238325	0.393778	0.527727	0.363541	-0.423906	-0.493846	-0.421659	0.273741	0.666068	0.719275	7.46176	7.86387	2.83829	-0.532961	-0.555635	-0.559225	-0.0317308	-0.059747	-0.0799155	0.559767	0.569685	0.552939	0.586474	0.603062	0.564503	0.269744	0.249697	0.279943	-0.517555	-0.568366	-0.600304	-0.00998071	-0.020762	-0.0487521	-0.428877	-0.430559	-0.528751	0.505878	0.558359	0.53375	0.828698	0.811287	0.803695	0.251979	0.23696	0.209163
2239.25	56.5537	0.284996	0.304678	0.243256	0.386955	0.522321	0.361689	-0.419666	-0.490864	-0.418007	0.266007	0.657544	0.709363	7.60534	7.99441	2.82938	-0.529199	-0.549889	-0.556154	-0.0431951	-0.0698336	-0.0915431	0.57032	0.579661	0.562074	0.590278	0.605523	0.566436	0.271099	0.249548	0.281768	-0.513756	-0.562572	-0.595692	-0.0207746	-0.0340272	-0.059962	-0.424492	-0.426957	-0.525796	0.509071	0.561474	0.53811	0.82967	0.814397	0.804304	0.249123	0.233073	0.206425
2242.41	56.6078	0.285223	0.308018	0.248208	0.380186	0.516472	0.359601	-0.415193	-0.487713	-0.414253	0.258627	0.648751	0.699272	7.74816	8.12381	2.81997	-0.525265	-0.544284	-0.552766	-0.0544293	-0.0798442	-0.102891	0.580904	0.589774	0.571585	0.594117	0.608115	0.568668	0.272421	0.249529	0.283675	-0.509906	-0.556613	-0.590949	-0.031564	-0.0470768	-0.0710147	-0.420177	-0.423067	-0.522743	0.512438	0.564779	0.542445	0.830436	0.817377	0.804613	0.246265	0.229206	0.203722
2245.6	56.6619	0.285766	0.311512	0.25317	0.373498	0.5102	0.357255	-0.410496	-0.484372	-0.410439	0.251573	0.639689	0.689003	7.89007	8.25192	2.81006	-0.521147	-0.538846	-0.549069	-0.0653971	-0.089776	-0.113924	0.591528	0.60001	0.581497	0.598001	0.610835	0.571217	0.273715	0.249644	0.28568	-0.506	-0.550482	-0.586066	-0.0423626	-0.0598969	-0.0818787	-0.41597	-0.418894	-0.519589	0.515989	0.568292	0.546761	0.830973	0.820184	0.804631	0.24341	0.225383	0.201062
2248.71	56.7159	0.286652	0.315183	0.258135	0.366906	0.503532	0.354637	-0.405587	-0.480822	-0.406606	0.244811	0.630369	0.67856	8.03089	8.37862	2.79965	-0.516835	-0.53359	-0.545073	-0.0760622	-0.0996226	-0.12461	0.60221	0.610363	0.591823	0.601945	0.613681	0.574098	0.27499	0.249897	0.287801	-0.502037	-0.544174	-0.581029	-0.0531795	-0.0724802	-0.0925245	-0.411904	-0.41445	-0.516334	0.519735	0.572022	0.551074	0.831256	0.822773	0.804371	0.240558	0.221623	0.198449
2251.87	56.77	0.287904	0.319056	0.263103	0.360417	0.496505	0.35174	-0.400482	-0.477043	-0.402797	0.238299	0.620804	0.667947	8.17045	8.50375	2.78875	-0.512318	-0.528526	-0.5408	-0.0863898	-0.109375	-0.134922	0.612977	0.620825	0.60257	0.60597	0.616654	0.577317	0.27626	0.250288	0.290051	-0.498013	-0.537693	-0.575829	-0.0640186	-0.0848249	-0.102927	-0.407999	-0.409751	-0.512978	0.523689	0.575975	0.555407	0.831259	0.825093	0.803853	0.237709	0.21794	0.195888
2255.31	56.8241	0.289538	0.323156	0.268077	0.354029	0.489154	0.348567	-0.395197	-0.473019	-0.399048	0.231991	0.611017	0.65717	8.30859	8.62721	2.77736	-0.507591	-0.523657	-0.536275	-0.0963474	-0.119018	-0.144837	0.623864	0.631397	0.613739	0.610102	0.619758	0.580877	0.27754	0.250816	0.29244	-0.493926	-0.531045	-0.570456	-0.0748796	-0.0969339	-0.113066	-0.404262	-0.404822	-0.509525	0.527864	0.580153	0.55979	0.830963	0.827091	0.803095	0.234864	0.214341	0.193384
2258.76	56.8782	0.291564	0.327504	0.273067	0.347736	0.48152	0.345126	-0.389754	-0.468734	-0.39539	0.225838	0.601035	0.646237	8.44512	8.74884	2.76548	-0.502652	-0.518975	-0.531527	-0.105907	-0.128536	-0.154341	0.634907	0.642084	0.625322	0.614374	0.623	0.584778	0.278851	0.251476	0.294974	-0.489773	-0.524245	-0.564909	-0.0857586	-0.108812	-0.12293	-0.400687	-0.399689	-0.505983	0.532276	0.584553	0.56426	0.830352	0.828714	0.802122	0.232022	0.210834	0.190938
2261.79	56.9322	0.293989	0.332118	0.278089	0.341525	0.473641	0.341436	-0.384178	-0.464178	-0.391843	0.219786	0.590885	0.635161	8.57987	8.86854	2.7531	-0.497505	-0.514469	-0.526584	-0.115046	-0.137908	-0.163428	0.646146	0.652901	0.637308	0.618818	0.626393	0.589011	0.280213	0.252267	0.297652	-0.485552	-0.517313	-0.559187	-0.0966465	-0.120466	-0.132517	-0.397255	-0.394387	-0.502362	0.536941	0.589168	0.568853	0.829419	0.829914	0.800956	0.229188	0.207418	0.188552
2264.83	56.9863	0.296815	0.337011	0.283163	0.33538	0.465552	0.337518	-0.378495	-0.459345	-0.388417	0.213785	0.580599	0.623954	8.71264	8.98617	2.74023	-0.492159	-0.51012	-0.521473	-0.123747	-0.147109	-0.172097	0.657623	0.663867	0.649682	0.623468	0.629954	0.593566	0.28165	0.25319	0.300468	-0.481262	-0.510273	-0.5533	-0.107529	-0.131897	-0.141833	-0.393941	-0.388952	-0.498673	0.541875	0.593991	0.573611	0.828165	0.830648	0.799621	0.226369	0.204089	0.186228
2268.22	57.0404	0.300047	0.342192	0.288318	0.329282	0.457285	0.333401	-0.372732	-0.454235	-0.38511	0.207784	0.570204	0.612633	8.84326	9.10161	2.72688	-0.486625	-0.505905	-0.516214	-0.132	-0.156113	-0.180356	0.669377	0.675008	0.662424	0.628353	0.633704	0.598432	0.283185	0.25425	0.30341	-0.476902	-0.503147	-0.54726	-0.118386	-0.1431	-0.150892	-0.390708	-0.383424	-0.494925	0.547097	0.599011	0.578572	0.826599	0.830882	0.798142	0.223578	0.20084	0.183967
2271.63	57.0944	0.303688	0.347663	0.293582	0.32321	0.448866	0.329119	-0.366912	-0.448855	-0.381909	0.201738	0.559728	0.601217	8.97155	9.21472	2.71303	-0.48092	-0.501795	-0.510823	-0.139803	-0.16489	-0.188212	0.681447	0.686357	0.675515	0.6335	0.637666	0.603594	0.284838	0.255456	0.306461	-0.472476	-0.495962	-0.541084	-0.129194	-0.154064	-0.159715	-0.387521	-0.377843	-0.49113	0.552626	0.604215	0.583773	0.824737	0.830593	0.796539	0.220831	0.197658	0.181773
2274.83	57.1485	0.307745	0.353424	0.298988	0.317145	0.440321	0.324712	-0.361057	-0.443216	-0.37879	0.195604	0.549189	0.589726	9.09732	9.32536	2.6987	-0.475067	-0.497763	-0.505311	-0.147162	-0.173409	-0.195677	0.693868	0.697948	0.688935	0.638929	0.641867	0.60904	0.286629	0.256822	0.3096	-0.467989	-0.48874	-0.534793	-0.139928	-0.164769	-0.16833	-0.384335	-0.372244	-0.487299	0.558481	0.60959	0.589245	0.822606	0.829767	0.79483	0.218148	0.19453	0.179648
2278	57.2026	0.312224	0.35947	0.304569	0.311068	0.431671	0.320221	-0.35518	-0.437334	-0.375722	0.189347	0.538602	0.578184	9.22039	9.4334	2.68388	-0.469091	-0.493782	-0.499682	-0.154092	-0.181638	-0.202759	0.706669	0.709821	0.702667	0.644658	0.646333	0.614757	0.288573	0.258364	0.312805	-0.46345	-0.481507	-0.528408	-0.150561	-0.17519	-0.176766	-0.38111	-0.366649	-0.483443	0.564679	0.61512	0.595012	0.820237	0.828403	0.793032	0.215549	0.191443	0.177596
2281.23	57.2567	0.317138	0.365792	0.310357	0.30497	0.422938	0.315687	-0.34929	-0.431231	-0.372667	0.182937	0.52797	0.566618	9.34058	9.53866	2.66858	-0.463024	-0.489829	-0.493934	-0.160616	-0.189548	-0.209468	0.719876	0.722018	0.716696	0.650698	0.651095	0.620737	0.29068	0.260106	0.316049	-0.458872	-0.474283	-0.521953	-0.16107	-0.185297	-0.185055	-0.377805	-0.361075	-0.479577	0.571236	0.620792	0.601092	0.817672	0.826511	0.791154	0.213055	0.188383	0.17562
2284.41	57.3107	0.3225	0.372374	0.316387	0.298847	0.414139	0.311151	-0.343392	-0.42493	-0.369588	0.176353	0.517289	0.555053	9.45771	9.64101	2.6528	-0.456894	-0.485887	-0.488059	-0.16676	-0.197117	-0.21581	0.733505	0.73458	0.731017	0.657055	0.656182	0.626974	0.292958	0.262072	0.31931	-0.454271	-0.467085	-0.515451	-0.171434	-0.195056	-0.193225	-0.374389	-0.355527	-0.475716	0.578168	0.626592	0.607495	0.814954	0.824112	0.789204	0.210689	0.185341	0.173726
2287.68	57.3648	0.328329	0.379201	0.32269	0.292706	0.405289	0.306651	-0.337485	-0.418462	-0.366446	0.169581	0.506546	0.543516	9.57161	9.74027	2.63653	-0.45073	-0.481941	-0.482047	-0.172552	-0.204325	-0.221789	0.747565	0.74755	0.745627	0.663733	0.661623	0.633467	0.29541	0.264293	0.322565	-0.449663	-0.459926	-0.508927	-0.181631	-0.204432	-0.201303	-0.370838	-0.350004	-0.471874	0.585486	0.632514	0.614226	0.812134	0.821237	0.78719	0.20847	0.182311	0.171915
2290.91	57.4189	0.334645	0.386258	0.329301	0.286566	0.396401	0.302221	-0.331561	-0.411857	-0.363211	0.162616	0.495722	0.532029	9.68213	9.83628	2.61978	-0.44456	-0.477979	-0.475883	-0.178023	-0.211162	-0.227407	0.762059	0.760965	0.760532	0.670729	0.66745	0.640217	0.298037	0.266795	0.3258	-0.445065	-0.452807	-0.502402	-0.19164	-0.213388	-0.20931	-0.367143	-0.344498	-0.468066	0.593196	0.638555	0.62128	0.809262	0.817922	0.785112	0.206418	0.179294	0.170191
2294.18	57.473	0.341474	0.393536	0.336249	0.280451	0.387489	0.297891	-0.325611	-0.405149	-0.359856	0.155462	0.484791	0.520607	9.78909	9.92886	2.60256	-0.438406	-0.473989	-0.469552	-0.183199	-0.217623	-0.232661	0.77698	0.774862	0.775744	0.678035	0.673689	0.64723	0.300839	0.269607	0.329005	-0.44049	-0.445726	-0.495901	-0.201443	-0.221891	-0.217263	-0.363307	-0.338997	-0.464307	0.601297	0.644717	0.62865	0.806389	0.814217	0.782969	0.204548	0.176291	0.168556
2297.45	57.527	0.348842	0.401032	0.343564	0.274399	0.37857	0.293684	-0.31962	-0.398368	-0.356364	0.148129	0.473723	0.509262	9.89235	10.0179	2.58487	-0.432286	-0.46996	-0.463037	-0.188107	-0.223704	-0.237545	0.79232	0.789271	0.791281	0.685641	0.680366	0.654513	0.303814	0.272759	0.332179	-0.435949	-0.438672	-0.489442	-0.211022	-0.229906	-0.225171	-0.359345	-0.333483	-0.460607	0.609782	0.651009	0.636319	0.803561	0.810182	0.780759	0.202875	0.173309	0.167014
2300.69	57.5811	0.356777	0.408749	0.351273	0.268451	0.369665	0.289618	-0.31357	-0.391548	-0.352726	0.140636	0.462487	0.498001	9.99176	10.1031	2.5667	-0.426213	-0.465886	-0.456322	-0.192766	-0.229409	-0.24205	0.808063	0.804218	0.807166	0.693531	0.6875	0.66208	0.306958	0.276275	0.335333	-0.431452	-0.431634	-0.483039	-0.220361	-0.237405	-0.233033	-0.355284	-0.327937	-0.456974	0.61864	0.65744	0.644269	0.800819	0.805887	0.778478	0.201406	0.170357	0.165566
2303.86	57.6352	0.365307	0.416696	0.359401	0.262657	0.360797	0.285707	-0.307443	-0.384719	-0.348944	0.13301	0.451049	0.486826	10.0872	10.1844	2.54808	-0.420194	-0.461763	-0.449392	-0.19719	-0.234743	-0.246164	0.824196	0.819719	0.823425	0.701691	0.695108	0.669945	0.310269	0.28018	0.338481	-0.427007	-0.424601	-0.476698	-0.229447	-0.244365	-0.240843	-0.351159	-0.322338	-0.453411	0.627855	0.664027	0.652482	0.798192	0.801407	0.776121	0.200145	0.167445	0.164217
2307.12	57.6893	0.374461	0.424888	0.367968	0.257069	0.351999	0.28196	-0.301221	-0.377915	-0.345029	0.125283	0.43938	0.475733	10.1784	10.2617	2.52902	-0.414228	-0.457587	-0.442236	-0.201385	-0.239714	-0.249877	0.840708	0.835786	0.840085	0.710106	0.703204	0.67813	0.313746	0.284491	0.341649	-0.422619	-0.41756	-0.470416	-0.238268	-0.250773	-0.248587	-0.347014	-0.316666	-0.449917	0.637407	0.670789	0.660936	0.795704	0.796823	0.773682	0.199088	0.164585	0.162974
2310.35	57.7433	0.384268	0.433348	0.376992	0.251739	0.343303	0.278382	-0.294891	-0.371168	-0.341002	0.11749	0.427452	0.464718	10.2654	10.3347	2.50953	-0.408304	-0.45336	-0.43485	-0.205348	-0.244335	-0.253179	0.857586	0.852421	0.857175	0.718766	0.711797	0.686655	0.317391	0.289223	0.344869	-0.418293	-0.4105	-0.464182	-0.246815	-0.256626	-0.256244	-0.342901	-0.310905	-0.446486	0.647274	0.677747	0.669617	0.793366	0.792212	0.771158	0.198226	0.161792	0.161843
2313.71	57.7974	0.394754	0.442102	0.386487	0.246717	0.334747	0.274976	-0.288444	-0.364511	-0.336894	0.109671	0.415249	0.453776	10.348	10.4035	2.48965	-0.402409	-0.449081	-0.427235	-0.209073	-0.24862	-0.256064	0.874821	0.869619	0.874722	0.727671	0.720892	0.695544	0.321208	0.294381	0.348178	-0.414028	-0.403415	-0.457982	-0.255083	-0.261933	-0.263789	-0.338873	-0.305041	-0.443111	0.657432	0.684927	0.678509	0.79118	0.787649	0.768545	0.197543	0.159079	0.160834
2317.12	57.8515	0.405942	0.451187	0.396466	0.242051	0.326371	0.271735	-0.281882	-0.357971	-0.332737	0.101864	0.40276	0.442896	10.4261	10.4677	2.46939	-0.396523	-0.444748	-0.419399	-0.212545	-0.252584	-0.258539	0.892408	0.887372	0.892756	0.736825	0.73049	0.70482	0.32521	0.299967	0.351618	-0.40982	-0.396303	-0.451794	-0.263069	-0.266713	-0.271189	-0.334983	-0.299068	-0.439778	0.667861	0.692353	0.687606	0.789142	0.783198	0.765846	0.197019	0.156466	0.159957
2320.39	57.9056	0.417851	0.460642	0.406941	0.23778	0.318215	0.268652	-0.275215	-0.351576	-0.328567	0.094107	0.389985	0.432075	10.4996	10.5275	2.44881	-0.390626	-0.440356	-0.411355	-0.215746	-0.256245	-0.260617	0.910341	0.905669	0.911305	0.746243	0.740591	0.714504	0.329413	0.305975	0.355236	-0.405661	-0.389169	-0.445598	-0.270774	-0.270992	-0.278411	-0.331281	-0.292988	-0.436471	0.678537	0.700051	0.696901	0.787238	0.778921	0.763064	0.196631	0.153968	0.159221
2323.43	57.9596	0.430492	0.470511	0.417924	0.233937	0.310317	0.265717	-0.268469	-0.345344	-0.324415	0.0864378	0.376937	0.421306	10.5683	10.5826	2.42797	-0.384697	-0.435898	-0.403124	-0.218658	-0.259616	-0.26232	0.928623	0.924497	0.930394	0.755947	0.751193	0.724617	0.333839	0.312389	0.359077	-0.401539	-0.382024	-0.439371	-0.278195	-0.274805	-0.285421	-0.32781	-0.286809	-0.433167	0.689443	0.708044	0.706393	0.78545	0.77487	0.760213	0.196351	0.151603	0.158635
2326.45	58.0137	0.443869	0.480844	0.429432	0.230542	0.302712	0.262918	-0.261677	-0.339291	-0.320309	0.0788896	0.36364	0.410585	10.6321	10.633	2.40691	-0.378719	-0.431362	-0.394735	-0.221262	-0.262709	-0.263675	0.947261	0.943841	0.95004	0.765966	0.762293	0.73518	0.338515	0.319189	0.363187	-0.397441	-0.374891	-0.433092	-0.285328	-0.278193	-0.292184	-0.324597	-0.280546	-0.429837	0.700562	0.71635	0.716084	0.783753	0.771093	0.757311	0.196149	0.149386	0.15821
2329.6	58.0678	0.457975	0.491689	0.44148	0.227603	0.295429	0.26025	-0.25488	-0.333424	-0.316271	0.0714911	0.350136	0.399909	10.691	10.6786	2.38573	-0.372675	-0.426735	-0.38623	-0.22354	-0.265532	-0.264711	0.966267	0.963689	0.970254	0.776336	0.77389	0.74621	0.343472	0.326351	0.367611	-0.393353	-0.367794	-0.426743	-0.292167	-0.2812	-0.298669	-0.321659	-0.274221	-0.42645	0.711882	0.724981	0.725978	0.78212	0.767634	0.754383	0.195994	0.147329	0.157952
2332.8	58.1218	0.4728	0.503094	0.454082	0.225117	0.288493	0.257711	-0.248131	-0.327748	-0.312313	0.0642644	0.33648	0.389279	10.7447	10.7194	2.36451	-0.366558	-0.422003	-0.377657	-0.225479	-0.268081	-0.265462	0.985661	0.984025	0.99104	0.787096	0.785981	0.757722	0.348747	0.333849	0.372387	-0.389263	-0.360764	-0.420311	-0.298702	-0.283871	-0.304847	-0.31899	-0.26786	-0.422971	0.723393	0.733946	0.736081	0.780523	0.764533	0.751459	0.19586	0.145439	0.157869
2336.2	58.1759	0.488325	0.515104	0.467254	0.223065	0.281924	0.255305	-0.241482	-0.322259	-0.308441	0.0572242	0.322733	0.378695	10.7933	10.7554	2.34336	-0.36037	-0.417155	-0.369074	-0.227072	-0.270345	-0.265961	1.00547	1.00484	1.0124	0.798296	0.798568	0.769727	0.35438	0.341658	0.37755	-0.385159	-0.353836	-0.413794	-0.304923	-0.286251	-0.310691	-0.316567	-0.26149	-0.419369	0.735094	0.743248	0.746402	0.778937	0.761825	0.748572	0.195721	0.143721	0.157966
2339.62	58.23	0.504528	0.527761	0.481008	0.22142	0.275739	0.253037	-0.234989	-0.316951	-0.304648	0.0503769	0.308965	0.368166	10.8366	10.7865	2.3224	-0.354125	-0.412182	-0.360541	-0.228318	-0.272306	-0.266249	1.02571	1.02613	1.03432	0.809984	0.811651	0.782232	0.360409	0.349756	0.383126	-0.381025	-0.347042	-0.407197	-0.310816	-0.288383	-0.31618	-0.314352	-0.255144	-0.415612	0.746985	0.752882	0.756949	0.777341	0.759539	0.745761	0.195557	0.142174	0.158249
2342.83	58.2841	0.521383	0.541096	0.495361	0.220142	0.269946	0.250916	-0.228709	-0.311813	-0.300918	0.0437202	0.295244	0.3577	10.8745	10.8127	2.30174	-0.347847	-0.40708	-0.352118	-0.229224	-0.273943	-0.266362	1.04643	1.04789	1.0568	0.822214	0.825232	0.79524	0.366874	0.358128	0.389133	-0.376848	-0.340411	-0.400537	-0.316367	-0.290307	-0.321296	-0.312291	-0.248853	-0.411676	0.759075	0.762839	0.767735	0.775721	0.757695	0.743068	0.195353	0.140794	0.158721
2346.07	58.3381	0.538861	0.555134	0.510327	0.219186	0.264544	0.248956	-0.222694	-0.306829	-0.297226	0.0372425	0.281637	0.347314	10.9069	10.8339	2.28152	-0.341567	-0.401848	-0.343863	-0.229801	-0.275232	-0.266337	1.06765	1.07013	1.07983	0.835038	0.839316	0.808752	0.373812	0.366761	0.395584	-0.372612	-0.333966	-0.393837	-0.321558	-0.292056	-0.326027	-0.31032	-0.242648	-0.407539	0.771374	0.773103	0.77877	0.774067	0.756306	0.740537	0.195105	0.139574	0.159386
2349.33	58.3922	0.556933	0.569892	0.525928	0.218498	0.259527	0.247171	-0.21699	-0.301985	-0.293541	0.0309235	0.268208	0.337026	10.9337	10.8501	2.26189	-0.335323	-0.396485	-0.33583	-0.230068	-0.276145	-0.266205	1.08941	1.09287	1.10338	0.848507	0.853912	0.822767	0.381259	0.375647	0.402484	-0.368301	-0.32772	-0.38713	-0.326369	-0.293659	-0.330371	-0.308373	-0.236558	-0.403193	0.783895	0.783657	0.790068	0.772378	0.755373	0.738216	0.194811	0.138504	0.160247
2352.61	58.4463	0.575568	0.585378	0.542184	0.218024	0.254881	0.245582	-0.211636	-0.297262	-0.289824	0.0247348	0.255014	0.326856	10.9549	10.8613	2.243	-0.329157	-0.390994	-0.328066	-0.230052	-0.276657	-0.265988	1.11174	1.11611	1.12743	0.862669	0.869035	0.837283	0.389242	0.384785	0.409832	-0.363899	-0.321675	-0.380456	-0.330774	-0.295136	-0.334332	-0.30638	-0.230606	-0.398636	0.796649	0.79448	0.801636	0.770659	0.754888	0.73615	0.19448	0.137573	0.161304
2355.81	58.5004	0.594741	0.601599	0.55912	0.217709	0.250591	0.244214	-0.20666	-0.292644	-0.286037	0.0186405	0.242104	0.316828	10.9703	10.8674	2.22498	-0.323111	-0.385377	-0.320611	-0.229783	-0.276742	-0.265701	1.13466	1.13987	1.15198	0.877563	0.884702	0.852297	0.39779	0.394181	0.417625	-0.359393	-0.315823	-0.37386	-0.334747	-0.2965	-0.337921	-0.30427	-0.224806	-0.393875	0.80965	0.805552	0.813482	0.768926	0.754838	0.734378	0.194125	0.136773	0.162554
2359.04	58.5544	0.614431	0.618556	0.576761	0.217504	0.246639	0.243096	-0.202076	-0.288118	-0.282138	0.0125981	0.229518	0.306969	10.9799	10.8685	2.208	-0.317233	-0.379643	-0.313495	-0.229297	-0.276372	-0.26535	1.1582	1.16419	1.17698	0.893224	0.900938	0.867806	0.406919	0.403846	0.425854	-0.35477	-0.310145	-0.36739	-0.338264	-0.297754	-0.341158	-0.301975	-0.219166	-0.388929	0.82291	0.816855	0.825605	0.767205	0.755201	0.732936	0.193767	0.136093	0.163997
2362.23	58.6085	0.634621	0.636248	0.595134	0.217364	0.243007	0.242262	-0.197887	-0.28367	-0.278089	0.00655882	0.217285	0.297304	10.9835	10.8643	2.19219	-0.311562	-0.373801	-0.30674	-0.228632	-0.275527	-0.264932	1.18239	1.18908	1.20243	0.90968	0.91777	0.883811	0.416646	0.413799	0.43451	-0.350027	-0.304619	-0.361089	-0.341305	-0.298895	-0.344067	-0.299429	-0.213688	-0.383824	0.836441	0.82837	0.838005	0.765532	0.755948	0.731848	0.193429	0.135525	0.165626
2365.42	58.6626	0.655306	0.654671	0.614262	0.217256	0.239675	0.241744	-0.194086	-0.279295	-0.273859	0.000469439	0.20542	0.28786	10.9812	10.855	2.1777	-0.306139	-0.367867	-0.300356	-0.227822	-0.274187	-0.264443	1.20722	1.21457	1.2283	0.926948	0.935231	0.900317	0.426983	0.424065	0.443584	-0.345166	-0.299213	-0.354997	-0.343855	-0.299915	-0.346678	-0.296576	-0.208368	-0.378593	0.850249	0.84008	0.850678	0.763949	0.757043	0.731133	0.193139	0.135065	0.167437
2368.69	58.7167	0.676489	0.673822	0.634171	0.217156	0.236627	0.241574	-0.190653	-0.274988	-0.26942	-0.00572523	0.193932	0.278661	10.9729	10.8404	2.16465	-0.300993	-0.361859	-0.294344	-0.2269	-0.272343	-0.263869	1.23271	1.24068	1.25457	0.945041	0.953355	0.917335	0.437938	0.434677	0.453067	-0.340191	-0.293893	-0.349147	-0.345907	-0.300799	-0.349019	-0.293374	-0.203199	-0.373274	0.864337	0.851969	0.86362	0.762503	0.758446	0.730798	0.192928	0.13471	0.16942
2371.98	58.7707	0.698185	0.693697	0.654882	0.217052	0.233842	0.241777	-0.187559	-0.270754	-0.264755	-0.0120801	0.182816	0.269728	10.9586	10.8205	2.15316	-0.296143	-0.355796	-0.288694	-0.225895	-0.26999	-0.263199	1.25884	1.26743	1.28124	0.963966	0.972178	0.934883	0.449515	0.445674	0.462956	-0.335113	-0.28862	-0.343565	-0.347465	-0.30153	-0.351121	-0.2898	-0.19817	-0.367905	0.878703	0.864027	0.876823	0.76124	0.760115	0.730841	0.192828	0.134463	0.171571
2375.32	58.8248	0.720421	0.714301	0.676418	0.216941	0.231303	0.242374	-0.184769	-0.266596	-0.259857	-0.0186478	0.172057	0.261078	10.9382	10.7953	2.14335	-0.291598	-0.349699	-0.283381	-0.224826	-0.267134	-0.262419	1.28561	1.29483	1.30829	0.983723	0.991737	0.952986	0.46172	0.4571	0.473252	-0.329949	-0.283356	-0.338268	-0.348538	-0.302086	-0.353011	-0.285847	-0.193269	-0.362527	0.89334	0.876249	0.890278	0.76021	0.762014	0.731252	0.192869	0.134328	0.173882
2378.64	58.8789	0.743231	0.735643	0.6988	0.216832	0.228995	0.243377	-0.182239	-0.262523	-0.254732	-0.0254775	0.161636	0.252728	10.9118	10.7647	2.13531	-0.287355	-0.343586	-0.278374	-0.223706	-0.263788	-0.261516	1.31299	1.32288	1.33571	1.00431	1.01207	0.971677	0.474555	0.469005	0.483965	-0.324721	-0.278064	-0.333264	-0.349149	-0.302448	-0.354714	-0.281532	-0.18848	-0.357173	0.908239	0.888637	0.903974	0.759458	0.764112	0.732009	0.193083	0.134317	0.176346
2381.72	58.9329	0.766653	0.757741	0.722043	0.216741	0.226904	0.244787	-0.179928	-0.258538	-0.249397	-0.0326117	0.151526	0.244689	10.8794	10.7288	2.12913	-0.283399	-0.337474	-0.27363	-0.22254	-0.259978	-0.260481	1.34095	1.35158	1.36352	1.02573	1.03321	0.990995	0.488024	0.481439	0.495108	-0.319456	-0.272716	-0.328551	-0.349327	-0.302595	-0.35625	-0.276887	-0.183785	-0.351872	0.923387	0.901194	0.917891	0.759024	0.766382	0.733087	0.193496	0.134444	0.178959
2384.81	58.987	0.790729	0.78062	0.746165	0.216692	0.225021	0.246599	-0.177791	-0.254644	-0.243878	-0.0400845	0.141701	0.236972	10.8409	10.6875	2.12485	-0.279704	-0.331381	-0.269104	-0.221322	-0.255733	-0.2593	1.36948	1.38093	1.39172	1.04797	1.0552	1.01099	0.502135	0.494449	0.506705	-0.314185	-0.267291	-0.324113	-0.34911	-0.302514	-0.357639	-0.271965	-0.179163	-0.346642	0.938763	0.913925	0.93201	0.758942	0.7688	0.734455	0.19413	0.134731	0.181715
2388.05	59.0411	0.815505	0.804309	0.771172	0.216715	0.223338	0.248799	-0.175789	-0.250836	-0.238208	-0.047919	0.132134	0.229582	10.7965	10.6409	2.12255	-0.276235	-0.325321	-0.26475	-0.220041	-0.251096	-0.257961	1.39853	1.4109	1.42031	1.07103	1.07807	1.03172	0.516894	0.508084	0.518784	-0.308942	-0.261782	-0.319927	-0.348546	-0.302195	-0.358892	-0.266828	-0.174591	-0.341491	0.954344	0.926839	0.946303	0.759241	0.771344	0.73608	0.194998	0.135207	0.184607
2391.29	59.0952	0.841025	0.828844	0.79707	0.21684	0.22185	0.251365	-0.173881	-0.247109	-0.232429	-0.0561273	0.122806	0.222518	10.7462	10.5889	2.12224	-0.272947	-0.319307	-0.260528	-0.218675	-0.246112	-0.256452	1.42811	1.44147	1.44932	1.09493	1.10184	1.05324	0.532312	0.522387	0.531385	-0.303764	-0.256195	-0.315959	-0.347688	-0.301632	-0.360021	-0.261545	-0.170044	-0.336417	0.970099	0.939945	0.960745	0.759938	0.773997	0.737928	0.19611	0.135902	0.187631
2394.68	59.1492	0.867334	0.854262	0.823859	0.217098	0.220557	0.254262	-0.172035	-0.243449	-0.226588	-0.0647098	0.113701	0.215771	10.6901	10.5316	2.12394	-0.269792	-0.313354	-0.256402	-0.217196	-0.240831	-0.254759	1.45818	1.47261	1.47875	1.11967	1.12656	1.07561	0.5484	0.537397	0.544551	-0.298684	-0.250549	-0.312172	-0.346592	-0.300827	-0.361028	-0.256188	-0.1655	-0.331407	0.985997	0.953252	0.975305	0.761045	0.77674	0.739968	0.197466	0.136856	0.19078
2398.06	59.2033	0.894471	0.880606	0.851532	0.217516	0.219464	0.257447	-0.170225	-0.23984	-0.220733	-0.0736555	0.104808	0.209329	10.6282	10.4689	2.12765	-0.266719	-0.307475	-0.252349	-0.215569	-0.235306	-0.252874	1.48875	1.50429	1.50863	1.14528	1.15223	1.09891	0.565173	0.553154	0.558332	-0.293731	-0.244874	-0.308522	-0.345322	-0.299785	-0.361914	-0.250826	-0.160944	-0.326442	1.00201	0.966769	0.989956	0.762561	0.779554	0.742171	0.199064	0.138107	0.19405
2401.28	59.2574	0.92247	0.907919	0.880076	0.218113	0.218582	0.260866	-0.168431	-0.236259	-0.214913	-0.0829429	0.0961253	0.203174	10.5607	10.4011	2.13336	-0.263678	-0.301686	-0.248352	-0.213755	-0.229587	-0.250786	1.5198	1.53646	1.53899	1.1718	1.17887	1.12318	0.582649	0.569688	0.572785	-0.288932	-0.239215	-0.304966	-0.34394	-0.29852	-0.362672	-0.245525	-0.156365	-0.321498	1.01809	0.980501	1.00467	0.764479	0.782418	0.744516	0.200898	0.139696	0.197437
2404.36	59.3115	0.951355	0.936243	0.90948	0.218902	0.217925	0.264458	-0.166646	-0.232676	-0.209172	-0.0925399	0.0876544	0.197285	10.4876	10.328	2.14102	-0.260621	-0.296	-0.244406	-0.211713	-0.223726	-0.248485	1.55133	1.56909	1.56984	1.19926	1.20651	1.14849	0.600852	0.587026	0.587963	-0.284305	-0.233623	-0.301458	-0.342507	-0.297047	-0.363289	-0.240342	-0.15176	-0.316543	1.03424	0.994449	1.01942	0.766784	0.785308	0.74699	0.20296	0.141658	0.200937
2407.55	59.3655	0.981138	0.965619	0.939726	0.219887	0.217508	0.268159	-0.164867	-0.229057	-0.20355	-0.102405	0.0794048	0.191635	10.4091	10.2498	2.15061	-0.257505	-0.290432	-0.240516	-0.209399	-0.217771	-0.245963	1.58337	1.60213	1.60122	1.22772	1.23515	1.1749	0.619808	0.605189	0.603924	-0.279866	-0.228154	-0.297951	-0.341078	-0.295387	-0.36375	-0.235327	-0.147136	-0.311542	1.05041	1.00861	1.0342	0.769454	0.788202	0.749592	0.205236	0.144026	0.204549
2410.82	59.4196	1.01182	0.996077	0.970799	0.221064	0.217351	0.271902	-0.163098	-0.225362	-0.198081	-0.112487	0.0713922	0.186197	10.3252	10.1666	2.16205	-0.254293	-0.284989	-0.236695	-0.206774	-0.211765	-0.243213	1.61592	1.63554	1.63313	1.25723	1.26481	1.20245	0.639548	0.62419	0.620726	-0.27562	-0.222865	-0.2944	-0.339695	-0.293562	-0.364039	-0.23052	-0.142503	-0.306458	1.06659	1.02297	1.04898	0.772467	0.791082	0.752331	0.207713	0.146823	0.208269
2414.11	59.4737	1.0434	1.02765	1.00268	0.222424	0.217476	0.275623	-0.161348	-0.221555	-0.192791	-0.122733	0.0636379	0.18094	10.2361	10.0783	2.17528	-0.250954	-0.279677	-0.232969	-0.203802	-0.205748	-0.240226	1.64903	1.66931	1.6656	1.28787	1.29548	1.23118	0.660106	0.644033	0.638421	-0.271566	-0.217809	-0.290767	-0.338393	-0.291593	-0.364139	-0.225945	-0.137876	-0.301254	1.08276	1.03751	1.06376	0.775798	0.793931	0.755226	0.210373	0.150063	0.2121
2417.36	59.5278	1.07586	1.06034	1.03536	0.223954	0.217905	0.279265	-0.159626	-0.217598	-0.187696	-0.133081	0.0561669	0.175836	10.1418	9.98526	2.19023	-0.247468	-0.274498	-0.229367	-0.200457	-0.199752	-0.236995	1.68272	1.70339	1.69862	1.31969	1.3272	1.26115	0.681515	0.664721	0.657062	-0.267693	-0.213037	-0.287015	-0.337189	-0.2895	-0.364038	-0.221613	-0.133271	-0.295897	1.09891	1.0522	1.07853	0.779424	0.796738	0.758301	0.213198	0.153751	0.216041
2420.62	59.5818	1.10916	1.09418	1.06883	0.225632	0.218663	0.28278	-0.157944	-0.213461	-0.182805	-0.143471	0.0490057	0.17086	10.0425	9.88739	2.2068	-0.243825	-0.269452	-0.225923	-0.19672	-0.193803	-0.233515	1.71703	1.73777	1.7322	1.35277	1.35998	1.29238	0.703806	0.686248	0.676693	-0.263987	-0.208592	-0.283116	-0.336091	-0.287304	-0.363728	-0.217517	-0.128712	-0.290362	1.115	1.06704	1.09331	0.783326	0.799492	0.761587	0.216168	0.15788	0.220096
2423.82	59.6359	1.14327	1.12914	1.10307	0.227438	0.219774	0.286131	-0.156315	-0.209121	-0.178122	-0.153839	0.0421826	0.165988	9.93835	9.78484	2.22491	-0.240024	-0.264534	-0.222676	-0.192579	-0.187916	-0.229782	1.752	1.77242	1.76632	1.38718	1.39385	1.32491	0.72701	0.708608	0.697356	-0.260426	-0.204511	-0.279048	-0.335092	-0.285024	-0.363203	-0.213636	-0.124222	-0.284629	1.13104	1.08197	1.1081	0.787489	0.802183	0.765119	0.219268	0.162432	0.224269
2427.12	59.69	1.17816	1.16523	1.13808	0.229353	0.221261	0.289296	-0.15475	-0.204564	-0.173642	-0.164121	0.0357249	0.1612	9.82933	9.6777	2.24445	-0.236073	-0.259739	-0.219661	-0.188035	-0.182101	-0.225796	1.78766	1.80734	1.80099	1.42299	1.42884	1.35875	0.751157	0.731798	0.719088	-0.256982	-0.20082	-0.274799	-0.334177	-0.282674	-0.362466	-0.209936	-0.11983	-0.278691	1.14699	1.09697	1.12291	0.791904	0.804797	0.768935	0.222484	0.167382	0.228564
2430.42	59.7441	1.21379	1.20243	1.17386	0.231361	0.223144	0.292264	-0.153258	-0.199787	-0.169354	-0.174255	0.0296571	0.156477	9.7156	9.5661	2.26534	-0.231987	-0.255055	-0.216906	-0.183099	-0.176356	-0.22156	1.82402	1.84253	1.83617	1.46028	1.46499	1.39393	0.776272	0.755814	0.741917	-0.253622	-0.19753	-0.270367	-0.333316	-0.280268	-0.361524	-0.206378	-0.115566	-0.272546	1.16286	1.11201	1.13776	0.796566	0.80733	0.773074	0.225806	0.17269	0.232984
2433.72	59.7981	1.25013	1.24071	1.21043	0.233453	0.225439	0.295039	-0.151846	-0.194801	-0.165243	-0.184181	0.0239987	0.151805	9.59726	9.45014	2.28745	-0.227786	-0.250471	-0.214429	-0.177791	-0.170677	-0.217083	1.86112	1.87799	1.87186	1.49911	1.50234	1.43048	0.802382	0.780657	0.765864	-0.250312	-0.19464	-0.265762	-0.332474	-0.277811	-0.36039	-0.202921	-0.111459	-0.2662	1.17862	1.12705	1.15267	0.801476	0.809786	0.777573	0.22923	0.17831	0.237534
2436.82	59.8522	1.28716	1.28004	1.2478	0.235624	0.228156	0.297638	-0.150518	-0.18963	-0.161291	-0.193841	0.0187635	0.147178	9.47443	9.32993	2.3107	-0.223493	-0.245971	-0.21224	-0.172142	-0.165051	-0.212373	1.89895	1.91372	1.90802	1.53954	1.54094	1.46842	0.829507	0.806333	0.790951	-0.247018	-0.192134	-0.261001	-0.331607	-0.275306	-0.359087	-0.199522	-0.107535	-0.25967	1.19429	1.14206	1.16764	0.80664	0.81219	0.782465	0.232756	0.184185	0.242217
2439.97	59.9063	1.32487	1.32038	1.28599	0.237879	0.231295	0.300091	-0.149271	-0.184309	-0.157481	-0.203183	0.0139584	0.142592	9.34722	9.2056	2.33497	-0.21913	-0.241534	-0.210334	-0.166191	-0.159464	-0.207442	1.93749	1.94975	1.94462	1.5816	1.58086	1.50779	0.857662	0.832849	0.817185	-0.243706	-0.189983	-0.256112	-0.330668	-0.272752	-0.357644	-0.196145	-0.103816	-0.252978	1.20985	1.15701	1.18269	0.81207	0.814582	0.787775	0.236386	0.190258	0.247039
2443.19	59.9603	1.36324	1.36172	1.32501	0.240226	0.234854	0.302442	-0.148099	-0.178884	-0.153799	-0.212153	0.00958189	0.138052	9.21572	9.07726	2.36017	-0.214719	-0.237141	-0.208697	-0.159984	-0.153897	-0.202302	1.97674	1.98609	1.98164	1.62535	1.62215	1.5486	0.886858	0.860217	0.844574	-0.240346	-0.188149	-0.251127	-0.329614	-0.270148	-0.356095	-0.192758	-0.100315	-0.246158	1.2253	1.17188	1.19782	0.817788	0.817019	0.793519	0.240128	0.196471	0.252001
2446.45	60.0144	1.40229	1.40401	1.36488	0.242684	0.238819	0.30474	-0.146991	-0.173409	-0.150233	-0.220708	0.00562358	0.133568	9.08005	8.94502	2.3862	-0.21028	-0.23277	-0.207302	-0.153572	-0.148332	-0.196967	2.01666	2.02275	2.01905	1.67082	1.66487	1.59091	0.917101	0.888456	0.873117	-0.236915	-0.186584	-0.246085	-0.328401	-0.26749	-0.354474	-0.189338	-0.0970375	-0.239244	1.24065	1.18664	1.21303	0.823822	0.819567	0.799702	0.243993	0.202768	0.257108
2449.7	60.0685	1.44204	1.44722	1.40562	0.245282	0.243172	0.307041	-0.145933	-0.167942	-0.146775	-0.228803	0.00206377	0.129154	8.94033	8.80901	2.41296	-0.20583	-0.228406	-0.206113	-0.147008	-0.142755	-0.191449	2.05721	2.05977	2.05682	1.71801	1.7091	1.63475	0.948384	0.917583	0.90281	-0.233393	-0.185236	-0.24103	-0.326995	-0.264773	-0.352819	-0.185869	-0.0939804	-0.232277	1.25589	1.2013	1.22831	0.830207	0.8223	0.806319	0.247991	0.2091	0.262363
2453	60.1226	1.48252	1.49132	1.44723	0.248053	0.247886	0.309402	-0.144904	-0.162541	-0.143422	-0.236402	-0.00112551	0.124828	8.79669	8.66934	2.44035	-0.20138	-0.224034	-0.205089	-0.140344	-0.137155	-0.18576	2.09833	2.09714	2.09494	1.76694	1.75491	1.68017	0.980699	0.947624	0.933643	-0.229768	-0.18405	-0.236008	-0.325368	-0.261991	-0.351164	-0.182343	-0.0911306	-0.225295	1.27103	1.21583	1.24366	0.83699	0.825291	0.81336	0.252138	0.215427	0.267768
2456.27	60.1766	1.52377	1.53627	1.48972	0.251039	0.252933	0.311875	-0.143877	-0.157263	-0.140179	-0.24347	-0.00397778	0.120612	8.64928	8.52615	2.4683	-0.196939	-0.219646	-0.20418	-0.133635	-0.131527	-0.179912	2.13997	2.13488	2.1334	1.81763	1.80235	1.72721	1.01403	0.978606	0.965603	-0.226037	-0.18297	-0.231069	-0.323505	-0.259138	-0.349541	-0.178759	-0.0884674	-0.218341	1.28607	1.23025	1.25906	0.844226	0.828612	0.820805	0.256451	0.221721	0.273325
2459.55	60.2307	1.56582	1.58204	1.53308	0.254281	0.258277	0.314511	-0.142824	-0.15216	-0.137053	-0.249976	-0.00652967	0.116532	8.49823	8.37955	2.49672	-0.192511	-0.215242	-0.203336	-0.126934	-0.125872	-0.173913	2.18205	2.173	2.17218	1.87006	1.85151	1.77595	1.04836	1.01056	0.998672	-0.222207	-0.181949	-0.22626	-0.321401	-0.256207	-0.347977	-0.175124	-0.0859646	-0.211454	1.30099	1.24457	1.27448	0.851985	0.832332	0.828629	0.260946	0.227963	0.279033
2462.72	60.2848	1.60874	1.62862	1.5773	0.257822	0.263885	0.317352	-0.141716	-0.147278	-0.134055	-0.255894	-0.00881845	0.112616	8.34373	8.2297	2.52554	-0.188094	-0.210828	-0.202507	-0.120288	-0.1202	-0.16777	2.2245	2.2115	2.21129	1.92424	1.90243	1.82642	1.08367	1.04351	1.03283	-0.218292	-0.180942	-0.221622	-0.319063	-0.253196	-0.346495	-0.17145	-0.0835918	-0.204671	1.31581	1.25879	1.28989	0.860365	0.836515	0.836803	0.265642	0.234144	0.28489
2465.96	60.3389	1.65256	1.67598	1.62234	0.261706	0.269719	0.320437	-0.140526	-0.142655	-0.131195	-0.261202	-0.01088	0.108891	8.18594	8.07672	2.55469	-0.18368	-0.20642	-0.201647	-0.113741	-0.114522	-0.161491	2.26725	2.25037	2.25074	1.98017	1.95518	1.8787	1.11995	1.07749	1.06805	-0.214315	-0.179911	-0.21719	-0.316508	-0.250103	-0.345105	-0.167752	-0.0813167	-0.198026	1.33052	1.27294	1.30526	0.869497	0.841224	0.845295	0.270556	0.240266	0.290893
2469.24	60.3929	1.69733	1.72411	1.66817	0.265975	0.275746	0.323793	-0.13923	-0.138315	-0.128482	-0.265878	-0.0127463	0.105381	8.02507	7.92076	2.58409	-0.179259	-0.202038	-0.200718	-0.107333	-0.108856	-0.155082	2.31024	2.28961	2.29053	2.03783	2.0098	1.93284	1.15716	1.11253	1.10432	-0.210304	-0.178828	-0.212991	-0.313759	-0.246931	-0.343811	-0.164046	-0.0791054	-0.191543	1.34512	1.28702	1.32054	0.879555	0.846521	0.854072	0.2757	0.246338	0.297037
2472.54	60.447	1.74308	1.773	1.71476	0.270666	0.281933	0.327438	-0.137803	-0.134274	-0.12592	-0.269905	-0.0144443	0.102106	7.86131	7.76197	2.6137	-0.174821	-0.197709	-0.199691	-0.101092	-0.103223	-0.148551	2.35341	2.3292	2.33069	2.09723	2.06633	1.9889	1.1953	1.14864	1.14161	-0.206294	-0.177667	-0.209041	-0.310848	-0.243684	-0.342604	-0.160344	-0.0769243	-0.185243	1.35959	1.30106	1.33571	0.890772	0.852463	0.863104	0.281086	0.252378	0.303314
2475.68	60.5011	1.78984	1.82264	1.76204	0.275814	0.288255	0.331381	-0.136227	-0.130534	-0.123509	-0.27327	-0.0159957	0.099078	7.69487	7.6005	2.64345	-0.170353	-0.193463	-0.198545	-0.0950437	-0.0976417	-0.141907	2.39671	2.36912	2.37121	2.15837	2.12481	2.04694	1.23434	1.18583	1.17989	-0.20232	-0.17641	-0.205349	-0.307807	-0.240372	-0.341464	-0.156662	-0.0747423	-0.179135	1.37394	1.31507	1.35071	0.903449	0.859103	0.872365	0.286719	0.25841	0.309718
2478.8	60.5552	1.83763	1.87302	1.80997	0.281445	0.294693	0.335619	-0.134482	-0.127086	-0.121243	-0.275961	-0.0174168	0.096304	7.52597	7.43652	2.67329	-0.16585	-0.189334	-0.19727	-0.0892006	-0.0921329	-0.135158	2.4401	2.40936	2.41212	2.22125	2.18527	2.10701	1.27427	1.22412	1.21915	-0.198421	-0.175049	-0.201911	-0.304671	-0.237004	-0.340361	-0.153006	-0.072534	-0.173221	1.38815	1.32906	1.36552	0.917977	0.86649	0.881834	0.292602	0.264466	0.316241
2482.16	60.6092	1.88644	1.92412	1.85847	0.287578	0.301236	0.340142	-0.132555	-0.123912	-0.119114	-0.277973	-0.0187178	0.0937854	7.35482	7.27017	2.70316	-0.161308	-0.185359	-0.195863	-0.0835664	-0.0867157	-0.128314	2.48354	2.44987	2.45342	2.28587	2.24772	2.16916	1.31508	1.2635	1.25936	-0.194634	-0.173577	-0.198717	-0.301473	-0.233594	-0.339255	-0.149383	-0.0702809	-0.167495	1.40221	1.34304	1.38011	0.93486	0.874659	0.891498	0.298731	0.270584	0.322874
2485.52	60.6633	1.93625	1.97593	1.90748	0.294225	0.307886	0.344934	-0.130437	-0.120981	-0.117112	-0.279305	-0.019903	0.0915165	7.18167	7.10165	2.73303	-0.15673	-0.181571	-0.19433	-0.0781353	-0.0814058	-0.121387	2.52702	2.49065	2.49511	2.35227	2.3122	2.23342	1.35674	1.30396	1.30052	-0.190991	-0.171994	-0.195751	-0.298241	-0.230157	-0.3381	-0.145791	-0.0679725	-0.161943	1.41611	1.35701	1.39446	0.954724	0.883636	0.901351	0.305099	0.276803	0.32961
2488.68	60.7174	1.98704	2.02843	1.95694	0.301389	0.314651	0.34998	-0.128122	-0.118261	-0.115227	-0.279963	-0.0209709	0.0894845	7.00672	6.93111	2.76284	-0.152123	-0.178001	-0.19268	-0.0728945	-0.0762125	-0.114394	2.57053	2.53166	2.5372	2.42045	2.3787	2.29983	1.39925	1.34548	1.3426	-0.187521	-0.170302	-0.19299	-0.294995	-0.226714	-0.336848	-0.142225	-0.0656064	-0.156545	1.42984	1.37097	1.40855	0.978325	0.893433	0.911399	0.311695	0.283162	0.336442
2491.8	60.7714	2.03875	2.0816	2.0068	0.309064	0.321549	0.35526	-0.125611	-0.11571	-0.113443	-0.279961	-0.0219148	0.0876706	6.83021	6.75874	2.79254	-0.1475	-0.174675	-0.190928	-0.0678257	-0.0711386	-0.107352	2.61407	2.57287	2.57967	2.49046	2.44723	2.36841	1.4426	1.38805	1.3856	-0.184243	-0.168503	-0.190408	-0.291746	-0.223284	-0.335452	-0.138678	-0.0631879	-0.151274	1.44338	1.38491	1.42237	1.00653	0.904047	0.921653	0.318509	0.289696	0.343363
2495.02	60.8255	2.09134	2.13541	2.057	0.317238	0.328604	0.360763	-0.12291	-0.113287	-0.111747	-0.27932	-0.022724	0.0860507	6.65235	6.58474	2.82209	-0.142876	-0.171609	-0.189089	-0.0629082	-0.0661805	-0.100281	2.65766	2.61426	2.62252	2.56232	2.5178	2.43918	1.48679	1.43164	1.42951	-0.181168	-0.166599	-0.187974	-0.288498	-0.219889	-0.333871	-0.135142	-0.0607304	-0.146105	1.45673	1.39883	1.4359	1.04033	0.915464	0.932134	0.325529	0.296437	0.350368
2498.22	60.8796	2.14473	2.18984	2.10749	0.325893	0.335847	0.36648	-0.120029	-0.110948	-0.110118	-0.27807	-0.0233871	0.0845971	6.47333	6.40928	2.85141	-0.138268	-0.16881	-0.187182	-0.0581193	-0.0613292	-0.0932041	2.70131	2.65581	2.66572	2.63609	2.5904	2.51215	1.53181	1.47621	1.47432	-0.178292	-0.164592	-0.185655	-0.285247	-0.216551	-0.332072	-0.131607	-0.0582547	-0.141016	1.4699	1.41271	1.44916	1.08075	0.927664	0.942864	0.332742	0.303413	0.357454
2501.55	60.9337	2.19887	2.24484	2.15826	0.335004	0.343312	0.372411	-0.116985	-0.108656	-0.108536	-0.276252	-0.0238942	0.0832801	6.29335	6.23257	2.88047	-0.133693	-0.166276	-0.185223	-0.0534358	-0.0565705	-0.0861437	2.74504	2.6975	2.70922	2.71178	2.66505	2.58732	1.57766	1.52175	1.52002	-0.175606	-0.162486	-0.183418	-0.281979	-0.213291	-0.330031	-0.128062	-0.0557878	-0.135987	1.48287	1.42651	1.46213	1.1289	0.940615	0.953868	0.340137	0.310646	0.364615
2504.86	60.9877	2.25367	2.30039	2.20926	0.344544	0.351035	0.37856	-0.113799	-0.106377	-0.10698	-0.273913	-0.0242388	0.0820698	6.1126	6.05479	2.90919	-0.129169	-0.163994	-0.183232	-0.0488351	-0.0518843	-0.0791236	2.78887	2.73932	2.75299	2.78945	2.74174	2.66468	1.62433	1.5682	1.56662	-0.173091	-0.160284	-0.181231	-0.278677	-0.210128	-0.327733	-0.124495	-0.0533599	-0.131003	1.49565	1.44022	1.47484	1.18588	0.95428	0.965168	0.347699	0.318154	0.371848
2508.14	61.0418	2.30906	2.35643	2.2605	0.354489	0.359056	0.384944	-0.110493	-0.104086	-0.10543	-0.271111	-0.0244186	0.0809378	5.93125	5.87617	2.9375	-0.124719	-0.161939	-0.181224	-0.0442961	-0.0472459	-0.072168	2.83283	2.78125	2.79697	2.86914	2.82047	2.74422	1.67183	1.61553	1.61411	-0.170722	-0.157989	-0.179069	-0.275317	-0.207078	-0.325175	-0.12089	-0.0510038	-0.126056	1.50824	1.45381	1.48729	1.25278	0.968611	0.976791	0.355416	0.325947	0.379151
2511.4	61.0959	2.36496	2.41291	2.31195	0.364811	0.367409	0.391581	-0.107097	-0.101768	-0.103865	-0.267909	-0.0244372	0.0798586	5.74946	5.69689	2.96535	-0.120367	-0.160084	-0.179214	-0.0397992	-0.042628	-0.065303	2.87691	2.82329	2.84111	2.95087	2.90126	2.82591	1.72014	1.66371	1.66248	-0.168473	-0.15561	-0.176911	-0.271874	-0.204154	-0.322368	-0.117231	-0.0487538	-0.121142	1.52065	1.46724	1.4995	1.33062	0.983551	0.988759	0.363278	0.334027	0.386521
2514.53	61.15	2.4213	2.46978	2.36361	0.375492	0.376127	0.398499	-0.103641	-0.0994205	-0.10227	-0.264374	-0.0243021	0.0788111	5.56739	5.51717	2.99263	-0.116134	-0.15839	-0.17721	-0.0353276	-0.038003	-0.0585568	2.92113	2.86543	2.88534	3.03467	2.9841	2.90973	1.76927	1.7127	1.71172	-0.166317	-0.153155	-0.174746	-0.268322	-0.20136	-0.31933	-0.113502	-0.046646	-0.116266	1.5329	1.4805	1.5115	1.42031	0.999034	1.00109	0.371281	0.34239	0.39396
2517.62	61.204	2.47802	2.52697	2.41549	0.386513	0.385235	0.405731	-0.10016	-0.097049	-0.100628	-0.260575	-0.024024	0.0777815	5.38522	5.33722	3.01928	-0.112044	-0.156816	-0.175212	-0.0308684	-0.0333447	-0.0519585	2.96547	2.90768	2.92962	3.12057	3.06901	2.99566	1.8192	1.76248	1.7618	-0.164227	-0.150637	-0.172569	-0.264638	-0.198699	-0.316097	-0.109693	-0.0447156	-0.111434	1.54501	1.49355	1.52331	1.52267	1.01499	1.0138	0.379425	0.351022	0.401471
2520.88	61.2581	2.53507	2.58441	2.46757	0.397864	0.394753	0.413313	-0.0966862	-0.0946689	-0.0989291	-0.256583	-0.0236176	0.0767641	5.2031	5.15724	3.04521	-0.108114	-0.155318	-0.173215	-0.0264136	-0.0286305	-0.0455353	3.00992	2.95003	2.97389	3.20859	3.15601	3.08366	1.86994	1.81303	1.81271	-0.162176	-0.148069	-0.17038	-0.260803	-0.196163	-0.31271	-0.105796	-0.0429933	-0.106657	1.55698	1.50638	1.53495	1.63838	1.03134	1.02691	0.387714	0.359901	0.409057
2524.11	61.3122	2.59238	2.64204	2.51986	0.409539	0.404693	0.421288	-0.0932505	-0.0923017	-0.0971658	-0.252464	-0.0231004	0.0757615	5.02118	4.97746	3.0703	-0.10436	-0.15385	-0.171204	-0.0219604	-0.0238426	-0.0393109	3.05445	2.99247	3.01808	3.29873	3.24509	3.17371	1.92147	1.86433	1.86442	-0.160142	-0.145464	-0.168186	-0.256803	-0.193738	-0.309223	-0.10181	-0.0415012	-0.101952	1.56883	1.51899	1.54644	1.76796	1.04803	1.04039	0.396157	0.369	0.416726
2527.55	61.3663	2.64994	2.69978	2.57236	0.421535	0.415059	0.429698	-0.0898786	-0.0899736	-0.0953334	-0.248282	-0.022491	0.0747836	4.83963	4.79806	3.09447	-0.10079	-0.15237	-0.169166	-0.0175115	-0.0189682	-0.0333038	3.09904	3.03501	3.06216	3.39099	3.33629	3.26578	1.97378	1.91637	1.91688	-0.158103	-0.142837	-0.165996	-0.252629	-0.191408	-0.305693	-0.0977341	-0.04025	-0.0973403	1.58057	1.53137	1.55779	1.91179	1.06497	1.05427	0.404763	0.37829	0.424485
2531.02	61.4203	2.70771	2.75756	2.62507	0.433856	0.425847	0.438589	-0.0865912	-0.0877127	-0.0934282	-0.244091	-0.021808	0.0738446	4.6586	4.61923	3.1176	-0.0974107	-0.150841	-0.167086	-0.0130744	-0.0139988	-0.0275251	3.14365	3.07763	3.10608	3.48537	3.42961	3.35986	2.02686	1.96913	1.97005	-0.156044	-0.140202	-0.163821	-0.248279	-0.189145	-0.302178	-0.0935684	-0.0392382	-0.0928477	1.59222	1.54352	1.56902	2.07006	1.08212	1.0685	0.413547	0.387737	0.43234
2534.15	61.4744	2.76566	2.8153	2.67795	0.44651	0.437048	0.448001	-0.0834017	-0.0855476	-0.0914474	-0.239938	-0.0210704	0.0729622	4.47825	4.44118	3.13959	-0.0942253	-0.149239	-0.164946	-0.0086604	-0.00893142	-0.0219778	3.18823	3.12032	3.1498	3.58185	3.52508	3.45592	2.08067	2.0226	2.02389	-0.153956	-0.137575	-0.161678	-0.24376	-0.18692	-0.29873	-0.0893173	-0.0384524	-0.0885008	1.60377	1.55545	1.58013	2.24279	1.0994	1.08309	0.422528	0.397313	0.440301
2537.19	61.5285	2.82378	2.87294	2.73099	0.459512	0.448649	0.45797	-0.0803163	-0.0835058	-0.0893894	-0.235858	-0.0202977	0.0721572	4.29875	4.26406	3.16033	-0.0912357	-0.147551	-0.162731	-0.0042819	-0.00377062	-0.0166567	3.23275	3.16308	3.19331	3.68042	3.62269	3.55397	2.13518	2.07677	2.07835	-0.151839	-0.134973	-0.159581	-0.239088	-0.184698	-0.295393	-0.08499	-0.0378687	-0.084324	1.61525	1.56718	1.59113	2.4298	1.11677	1.098	0.431721	0.406993	0.448377
2540.44	61.5826	2.88205	2.9304	2.78415	0.472881	0.460634	0.468527	-0.077335	-0.081613	-0.0872539	-0.231874	-0.0195103	0.0714517	4.12026	4.08806	3.17968	-0.0884424	-0.145777	-0.160423	4.95879e-05	0.00147014	-0.0115492	3.27715	3.20587	3.23658	3.78105	3.72247	3.65399	2.19035	2.13162	2.13336	-0.149701	-0.132409	-0.157548	-0.234288	-0.182439	-0.292201	-0.0806014	-0.0374533	-0.0803371	1.62666	1.57874	1.60203	2.63075	1.1342	1.11323	0.441144	0.416759	0.456576
2543.73	61.6366	2.94044	2.98762	2.83738	0.486642	0.47299	0.479694	-0.0744527	-0.0798914	-0.0850445	-0.227995	-0.0187277	0.0708682	3.94297	3.91331	3.19755	-0.0858435	-0.143926	-0.158007	0.00432353	0.00676884	-0.00663669	3.32139	3.24869	3.27963	3.8837	3.82442	3.75598	2.24615	2.18713	2.18889	-0.147558	-0.129895	-0.155592	-0.229393	-0.180105	-0.289176	-0.0761724	-0.0371638	-0.0765517	1.638	1.59016	1.61283	2.84515	1.15164	1.12874	0.45081	0.4266	0.464909
2547.03	61.6907	2.99894	3.04454	2.89064	0.500822	0.485701	0.491487	-0.0716597	-0.0783571	-0.0827687	-0.224218	-0.0179673	0.0704272	3.76705	3.73997	3.21381	-0.083434	-0.142017	-0.155471	0.0085313	0.0120966	-0.00189564	3.36543	3.29151	3.32244	3.98836	3.92853	3.85994	2.30251	2.24328	2.24488	-0.145425	-0.12744	-0.153727	-0.224441	-0.177659	-0.286329	-0.0717295	-0.0369524	-0.0729721	1.64927	1.60147	1.62354	3.07232	1.16909	1.14453	0.460728	0.436514	0.473385
2550.28	61.7448	3.0575	3.10111	2.94386	0.515452	0.498755	0.503918	-0.0689423	-0.0770178	-0.0804377	-0.220527	-0.0172436	0.0701445	3.59269	3.56817	3.22834	-0.0812053	-0.140077	-0.152804	0.0126671	0.01742	0.00270149	3.40924	3.3343	3.36503	4.09498	4.03479	3.96587	2.35939	2.30003	2.30128	-0.143323	-0.125047	-0.151958	-0.219471	-0.175069	-0.28366	-0.0673054	-0.0367681	-0.0695956	1.66047	1.61272	1.63416	3.31145	1.18656	1.16057	0.470903	0.446504	0.482015
2553.5	61.7988	3.1161	3.15728	2.99698	0.530561	0.512147	0.516991	-0.0662831	-0.0758726	-0.0780669	-0.216893	-0.0165678	0.0700283	3.42005	3.39803	3.24103	-0.0791431	-0.138137	-0.150002	0.0167295	0.0227031	0.00718391	3.45279	3.37702	3.40741	4.20353	4.14319	4.07377	2.41674	2.35734	2.35805	-0.141268	-0.122718	-0.150281	-0.214521	-0.172308	-0.281151	-0.0629401	-0.03656	-0.0664144	1.6716	1.62392	1.64468	3.5616	1.20406	1.17687	0.48134	0.456585	0.490807
2556.69	61.8529	3.17468	3.21302	3.04994	0.54618	0.525878	0.530709	-0.0636615	-0.0749118	-0.0756756	-0.213276	-0.0159497	0.0700791	3.24932	3.22967	3.25178	-0.0772281	-0.136231	-0.147059	0.0207229	0.0279097	0.0115818	3.49606	3.41965	3.44958	4.31395	4.25368	4.18364	2.47449	2.41518	2.41515	-0.139273	-0.120451	-0.148685	-0.209628	-0.169356	-0.278773	-0.0586799	-0.0362802	-0.0634153	1.68263	1.63513	1.65511	3.82168	1.22163	1.19341	0.492036	0.466782	0.499769
2559.93	61.907	3.23321	3.26832	3.10268	0.562341	0.539957	0.545067	-0.0610551	-0.0741188	-0.0732866	-0.209624	-0.0153983	0.0702896	3.08066	3.06321	3.26048	-0.0754371	-0.134394	-0.143976	0.0246582	0.0330039	0.0159254	3.53903	3.46215	3.49156	4.42623	4.36624	4.29548	2.53261	2.47348	2.47256	-0.137347	-0.11824	-0.147148	-0.204822	-0.166202	-0.27648	-0.0545743	-0.0358853	-0.0605799	1.69355	1.64636	1.66545	4.09047	1.2393	1.21019	0.502986	0.477125	0.508908
2563.15	61.9611	3.29163	3.32315	3.15513	0.579077	0.554407	0.560062	-0.0584413	-0.0734696	-0.0709272	-0.205878	-0.0149213	0.0706465	2.91423	2.89875	3.26704	-0.0737442	-0.132657	-0.140758	0.0285519	0.0379508	0.0202436	3.58172	3.50449	3.53336	4.5403	4.4808	4.40929	2.59103	2.5322	2.53026	-0.135495	-0.116079	-0.145642	-0.200125	-0.162842	-0.274222	-0.0506718	-0.0353373	-0.0578844	1.70436	1.65765	1.67569	4.36664	1.25712	1.22722	0.514175	0.48765	0.518228
2566.4	62.0151	3.34988	3.37752	3.20723	0.59642	0.569259	0.575689	-0.0557996	-0.0729344	-0.0686304	-0.201972	-0.0145235	0.0711304	2.7502	2.73641	3.27137	-0.072123	-0.131046	-0.137417	0.0324251	0.0427186	0.0245613	3.62412	3.54662	3.57497	4.65613	4.59729	4.52505	2.64971	2.59126	2.58823	-0.13372	-0.113961	-0.144131	-0.195555	-0.159287	-0.271938	-0.0470175	-0.0346049	-0.0553014	1.71502	1.66902	1.68584	4.64874	1.27515	1.24451	0.525582	0.498392	0.527733
2569.63	62.0692	3.40789	3.43142	3.25895	0.6144	0.584553	0.591942	-0.0531146	-0.0724786	-0.0664348	-0.197837	-0.0142061	0.0717167	2.58869	2.5763	3.2734	-0.0705475	-0.129578	-0.133975	0.0363018	0.0472787	0.0288958	3.66624	3.58852	3.6164	4.77368	4.71564	4.64273	2.70861	2.6506	2.64646	-0.13202	-0.111885	-0.142576	-0.191124	-0.15556	-0.26957	-0.0436496	-0.0336669	-0.0528036	1.72554	1.6805	1.69589	4.93523	1.29344	1.26208	0.537178	0.509382	0.537424
2573	62.1233	3.46561	3.48486	3.31024	0.633041	0.600336	0.608821	-0.0503797	-0.0720665	-0.0643813	-0.193403	-0.013965	0.0723757	2.42986	2.41854	3.27308	-0.0689923	-0.128261	-0.130456	0.0402074	0.0516071	0.0332533	3.70811	3.63015	3.65764	4.8929	4.83577	4.76231	2.7677	2.71013	2.70494	-0.130387	-0.109847	-0.140935	-0.186836	-0.151697	-0.267063	-0.040598	-0.0325157	-0.0503638	1.73588	1.69208	1.70585	5.22448	1.31206	1.27994	0.548931	0.520648	0.547299
2576.41	62.1774	3.52295	3.53786	3.36108	0.652367	0.616659	0.626325	-0.0475991	-0.0716634	-0.0625103	-0.188603	-0.0137903	0.0730736	2.27382	2.26323	3.27035	-0.0674324	-0.127091	-0.126886	0.0441675	0.0556845	0.0376276	3.74974	3.67148	3.69867	5.01374	4.95757	4.88372	2.82694	2.76979	2.76365	-0.128807	-0.10785	-0.139171	-0.182687	-0.147746	-0.264367	-0.0378834	-0.0311598	-0.0479551	1.74605	1.70377	1.71574	5.51483	1.33105	1.29812	0.560805	0.532208	0.557355
2579.65	62.2314	3.57987	3.59044	3.41144	0.672393	0.633578	0.644454	-0.0447876	-0.0712372	-0.0608586	-0.183376	-0.0136682	0.0737741	2.12069	2.11051	3.26518	-0.0658432	-0.126054	-0.123294	0.0482069	0.0594974	0.0420009	3.79114	3.71247	3.73947	5.13616	5.08094	5.00692	2.88632	2.8295	2.82259	-0.12726	-0.105893	-0.13725	-0.178666	-0.14376	-0.261442	-0.0355186	-0.0296225	-0.045553	1.75603	1.71558	1.72557	5.80461	1.35047	1.31665	0.572764	0.544073	0.56759
[truncated: 606 more rows]
