# Supplementary material
Source: Research Square preprint supplement (doi:10.21203/rs.3.rs-9788709/v1)
Supplement: Supplementary file 6 [file aa7c4890ade89b3a8620b078.xlsx]

## Sheet: README
	Article title:
	Biophysical dissection of high-signal phenotypes in AI-guided evolution of leucine-rich repeat binders
	Journal:
	The Protein Journal
	Authors:
	Junjae Park, Saehae Choi, Eun Yi Jeon, Hyeonjeong Yu, Cho Hyun Kim, Jieun Lee, Soyoung An, Myungho Sohn, Won-Kyu Lee
	Corresponding author:
	Won-Kyu Lee, New Drug Development Center, Osong Medical Innovation Foundation, Cheongju 28160, Republic of Korea
	E-mail: gregorio7@korea.kr
	This Excel file contains filtered AiCE output entries for the VLR scaffold, including mutation pairs, confidence flags, mean pairwise scores, and log-transformed mean pairwise scores.

## Sheet: AiCE_outputs_VLR
Mutation_Pair	Flag	Mean_Pairwise_Score	Log_Mean_Pairwise_Score
Q54N,K75N	1	1.8613	0.6213
Q54N,N99N	1	1.8384	0.6089
K75N,N99N	1	1.7926	0.5837
D59D,D61S	1	1.3792	0.3215
Q32T,W113W	1	1.2361	0.2119
W113W,N139G	1	1.2125	0.1927
Q32T,W126W	1	1.2093	0.1901
W126W,N139G	1	1.1869	0.1714
C2C,Q32T	1	1.1405	0.1315
Q32T,C115C	1	1.1405	0.1315
C15C,Q32T	1	1.1405	0.1315
C8C,Q32T	1	1.1405	0.1315
C6C,Q32T	1	1.1405	0.1315
Q32T,C167C	1	1.1334	0.1253
Q32T,C147C	1	1.1334	0.1252
Q32T,C117C	1	1.1334	0.1252
C15C,N139G	1	1.1186	0.112
C8C,N139G	1	1.1186	0.112
C6C,N139G	1	1.1186	0.112
C2C,N139G	1	1.1186	0.112
C115C,N139G	1	1.1186	0.112
C117C,N139G	1	1.1118	0.106
N139G,C147C	1	1.1118	0.106
N139G,C167C	1	1.1118	0.106
Q32T,Y122Y	1	1.0829	0.0797
K90T,D114N	1	1.0777	0.0748
Y122Y,N139G	1	1.0624	0.0605
Q32T,F73F	1	1.0591	0.0574
Q32T,N63N	1	1.0554	0.0539
Q32T,F49F	1	1.0521	0.0508
Q32T,N39N	1	1.0484	0.0472
Q32T,N111N	1	1.0483	0.0472
Q32T,N87N	1	1.0483	0.0472
F73F,N139G	1	1.0387	0.038
Q32T,F97F	1	1.0386	0.0379
N63N,N139G	1	1.0351	0.0345
F49F,N139G	1	1.032	0.0315
N111N,N139G	1	1.0283	0.0279
N39N,N139G	1	1.0283	0.028
N87N,N139G	1	1.0283	0.0279
P24P,Q32T	1	1.0256	0.0253
Q32T,P69P	1	1.0256	0.0253
Q32T,P93P	1	1.0256	0.0253
Q32T,P112P	1	1.0256	0.0253
Q32T,I41I	1	1.0226	0.0224
F97F,N139G	1	1.0191	0.0189
P3P,Q32T	1	1.0116	0.0115
P93P,N139G	1	1.0059	0.0059
P24P,N139G	1	1.0059	0.0059
P112P,N139G	1	1.0059	0.0059
P69P,N139G	1	1.0059	0.0059
I41I,N139G	1	1.003	0.003
Q32T,T162T	1	1.0001	0.0001
Q32T,P153P	1	0.9924	-0.0076
P3P,N139G	1	0.9924	-0.0076
P28P,Q32T	1	0.986	-0.0141
I27I,Q32T	1	0.9832	-0.0169
N139G,T162T	1	0.9812	-0.019
A21T,W113W	1	0.9809	-0.0193
Q32T,G95G	1	0.9747	-0.0257
N139G,P153P	1	0.9741	-0.0263
P28P,N139G	1	0.9679	-0.0326
S16S,Q32T	1	0.9678	-0.0327
G26G,Q32T	1	0.9676	-0.033
I27I,N139G	1	0.9652	-0.0354
Q32T,N139G	1	0.9638	-0.0368
Q32T,P131P	1	0.9625	-0.0382
Q32T,G136G	1	0.9607	-0.0401
Q32T,G47G	1	0.9607	-0.0401
G95G,N139G	1	0.9559	-0.0451
