# Supplementary material
Source: Research Square preprint supplement (doi:10.21203/rs.3.rs-9788709/v1)
Supplement: Supplementary file 7 [file ee524174cbbf13a8c81dc35b.xlsx]

## Sheet: README
	Article title:
	Biophysical dissection of high-signal phenotypes in AI-guided evolution of leucine-rich repeat binders
	Journal:
	The Protein Journal
	Authors:
	Junjae Park, Saehae Choi, Eun Yi Jeon, Hyeonjeong Yu, Cho Hyun Kim, Jieun Lee, Soyoung An, Myungho Sohn, Won-Kyu Lee
	Corresponding author:
	Won-Kyu Lee, New Drug Development Center, Osong Medical Innovation Foundation, Cheongju 28160, Republic of Korea
	E-mail: gregorio7@korea.kr
	Online Resource 1 Construct sequences and oligonucleotide primers. Sheets: - Construct_sequences: amino-acid and nucleotide sequences of key VLR and repebody constructs. - Mutagenesis_VLR_Primer: oligonucleotide primers used for VLR cloning and mutagenesis. - Mutagenesis_Repe_Primer: oligonucleotide primers used for repebody cloning and mutagenesis.

## Sheet: Construct_sequences
VLR WT seq
HEL-VLR_WT	Protein seq	MARIRARGSACPSQCSCSGTTVDCSGKSLASVPTGIPTTTQVLYLYDNQITKLEPGVFDRLTQLTRLDLDNNQLTVLPAGVFDKLTQLTQLSLNDNQLKSIPRGAFDNLKSLTHIWLLNNPWDCACSDILYLSRWISQHPGLVFGYLNLDPDSARCSGTNTPVRAVTEASTSPSKCP
	Nucleotide Seq	ATGGCCCGTATCCGCGCGCGCGGTAGCGCGTGCCCTTCGCAGTGTAGCTGTAGCGGGACAACCGTCGATTGTAGCGGAAAGAGCCTGGCGAGCGTCCCGACCGGCATTCCGACCACAACGCAGGTGCTGTATCTGTACGACAATCAAATCACAAAGCTGGAACCAGGCGTTTTCGACCGCCTGACCCAGCTGACGCGCCTGGACCTTGACAATAACCAGCTTACCGTTCTTCCGGCTGGCGTTTTTGATAAACTGACCCAGCTGACCCAACTGAGTCTGAACGACAACCAACTGAAATCAATCCCGCGCGGCGCATTCGATAATCTGAAATCCCTGACCCATATCTGGCTTCTGAATAATCCGTGGGACTGCGCGTGCTCTGATATTCTGTATCTGTCG…
repebody WT seq
HEL-Repebody_WT	Protein seq	MTITVSTPIKQIFPDDAFAETIKANLKKKSVTDAVTQNELNSIDQIIANNSDIKSVQGIQYLPNVRYLALGGNKLHDISALKELTNLTYLILTGNQLQSLPNGVFDKLTNLKELVLVENQLQSLPDGVFDKLTNLTYLYLYHNQLQSLPKGVFDKLTNLTRLDLDNNQLQSLPEGVFDKLTQLKQLSLNDNQLKSVPDGVFDRLTSLTHIWLLNNPWDCACSDILYLSRWISQHPGLVFGYLNLDPDSARCSGTNTPVRAVTEASTSPSKCPG
	Nucleotide seq	ATGACAATTACGGTGTCTACCCCGATTAAGCAGATTTTCCCTGACGATGCCTTCGCGGAAACCATTAAGGCCAATTTGAAAAAAAAATCTGTAACCGACGCCGTAACACAGAATGAGTTGAATAGCATTGATCAGATTATCGCCAACAACTCTGATATTAAATCCGTGCAAGGTATTCAGTACCTGCCAAATGTGCGTTATCTGGCCCTGGGAGGCAATAAATTGCATGATATTTCAGCACTTAAAGAACTGACCAATTTAACGTACCTGATTCTGACAGGGAACCAGCTGCAGTCGCTTCCGAATGGCGTATTTGACAAGCTGACGAATCTGAAAGAGCTGGTTCTGGTGGAAAACCAGCTGCAATCACTGCCGGACGGCGTGTTTGACAAATTAACG…

## Sheet: Mutagenesis_VLR_Primer
Gene	Direction	Sequence
Insert Primer
HELVLR_F	Forward Primer	TTA AGA AGG AGA TAT ACC ATG GCC CGT ATC CGC GCG
HELVLR_R	Reverse Primer	GTG ATG ATG ATG ATG ATG CGG ACA TTT CGA CGG GCT A
Vector Primer
pET28a_V_F	Forward Primer	CAT CAT CAT CAT CAT CAC TGA GTT GGC TGC TGC CAC
pET28a_V_R	Reverse Primer	GGT ATA TCT CCT TCT TAA AGT TAA ACA AAA TTA TTT CTA GAG GGG
AiCE Primer
Q54N_F	Forward Primer	CTG ACC AAC CTG ACG CGC CTG GAC
Q54N_R	Reverse Primer	CGT CAG GTT GGT CAG GCG GTC GAA AAC
K75N_F	Forward Primer	TTT GAT AAC CTG ACC CAG CTG ACC CA
K75N_R	Reverse Primer	GGT CAG GTT ATC AAA AAC GCC AGC CG
Round 1 Mutagenesis Primer
1.C11H_F	Forward Primer	GCG CGC GCG GTA GCG CGC ATC CTT CGC AGT GTA GCT
1.C11H_R	Reverse Primer	AGC TAC ACT GCG AAG GAT GCG CGC TAC CGC GCG CG
2.L43K_F	Forward Primer	CCG GCA TTC CGA CCA CAA CGC AGG TGA AGT ATC TGT ACG ACA ATC AAA TCA C
2.L43K_R	Reverse Primer	GTG ATT TGA TTG TCG TAC AGA TAC TTC ACC TGC GTT GTG GTC GGA ATG CCG G
3.E54T_F	Forward Primer	GTA CGA CAA TCA AAT CAC AAA GCT GAC CCC AGG CGT TTT CGA CCG CCT GAC C
3.E54T_R	Reverse Primer	GGT CAG GCG GTC GAA AAC GCC TGG GGT CAG CTT TGT GAT TTG ATT GTC GTA C
4.D59R_F	Forward Primer	GCT GGA ACC AGG CGT TTT CCG CCG CCT GAC CCA GCT GAC GCG
4.D59R_R	Reverse Primer	CGC GTC AGC TGG GTC AGG CGG CGG AAA ACG CCT GGT TCC AGC
5.D95Y_F	Forward Primer	CCA GCT GAC CCA ACT GAG TCT GAA CTA CAA CCA ACT GAA ATC AAT CCC GCG CGG
5.D95Y_R	Reverse Primer	CCG CGC GGG ATT GAT TTC AGT TGG TTG TAG TTC AGA CTC AGT TGG GTC AGC TGG
6.F106Q_F	Forward Primer	CTG AAA TCA ATC CCG CGC GGC GCA CAG GAT AAT CTG AAA TCC CTG ACC CAT A
6.F106Q_R	Reverse Primer	TAT GGG TCA GGG ATT TCA GAT TAT CCT GTG CGC CGC GCG GGA TTG ATT TCA G
7.P121Y_F	Forward Primer	CCC TGA CCC ATA TCT GGC TTC TGA ATA ATT ACT GGG ACT GCG CGT GCT CTG ATA TTC TG
7.P121Y_R	Reverse Primer	CAG AAT ATC AGA GCA CGC GCA GTC CCA GTA ATT ATT CAG AAG CCA GAT ATG GGT CAG GG
8.A125C_F	Forward Primer	CTG GCT TCT GAA TAA TCC GTG GGA CTG CTG CTG CTC TGA TAT TCT GTA TCT GTC GCG CTG G
8.A125C_R	Reverse Primer	CCA GCG CGA CAG ATA CAG AAT ATC AGA GCA GCA GCA GTC CCA CGG ATT ATT CAG AAG CCA G
9.W122F_F	Forward Primer	CCC ATA TCT GGC TTC TGA ATA ATC CGT TCG ACT GCG CGT GCT CTG ATA TTC TG
9.W122F_R	Reverse Primer	CAG AAT ATC AGA GCA CGC GCA GTC GAA CGG ATT ATT CAG AAG CCA GAT ATG GG
10.W135T_F	Forward Primer	CTG ATA TTC TGT ATC TGT CGC GCA CGA TCT CAC AGC ACC CTG GGC TTG
10.W135T_R	Reverse Primer	CAA GCC CAG GGT GCT GTG AGA TCG TGC GCG ACA GAT ACA GAA TAT CAG
11.H139F_F	Forward Primer	TCA CAG TTT CCT GGG CTT GTA TTC GGT
11.H139F_R	Reverse Primer	CCC AGG AAA CTG TGA GAT CCA GCG CG
12.P151K_F	Forward Primer	CTG GAC AAA GAT AGT GCC CGC TGT TCG
12.P151K_R	Reverse Primer	CAC TAT CTT TGT CCA GGT TCA GAT AAC CGA AT
Round 2 Mutagenesis Primer
1.H139L_F	Forward Primer	TCA CAG CTG CCT GGG CTT GTA TTC GGT T
1.H139L_R	Reverse Primer	CCC AGG CAG CTG TGA GAT CCA GCG CGA
2.T65L_F	Forward Primer	CAG CTG CTG CGC CTG GAC CTT GAC AAT
2.T65L_R	Reverse Primer	CAG GCG CAG CAG CTG GGT CAG GCG
3.Y146K_F	Forward Primer	TTC GGT AAA CTG AAC CTG GAC CCG G
3.Y146K_R	Reverse Primer	GGT TCA GTT TAC CGA ATA CAA GCC CAG G
4.T65K_F	Forward Primer	CAG CTG AAA CGC CTG GAC CTT GAC AAT
4.T65K_R	Reverse Primer	CAG GCG TTT CAG CTG GGT CAG GCG
5.T62K_F	Forward Primer	CGC CTG AAA CAG CTG ACG CGC CT
5.T62K_R	Reverse Primer	CAG CTG TTT CAG GCG GTC GAA AAC G
6.T65F_F	Forward Primer	CAG CTG TTT CGC CTG GAC CTT GAC AAT
6.T65F_R	Reverse Primer	CAG GCG AAA CAG CTG GGT CAG GCG
7.Q87V_F	Forward Primer	CTG ACC GTG CTG ACC CAA CTG AGT CTG AAC
7.Q87V_R	Reverse Primer	GGT CAG CAC GGT CAG TTT ATC AAA AAC GCC AG
8.T89K_F	Forward Primer	CAG CTG AAA CAA CTG AGT CTG AAC GAC AAC C
8.T89K_R	Reverse Primer	CAG TTG TTT CAG CTG GGT CAG TTT ATC AAA AAC
9.T89L_F	Forward Primer	CAG CTG CTG CAA CTG AGT CTG AAC GAC AAC C
9.T89L_R	Reverse Primer	CTC AGT TGC AGC AGC TGG GTC AGT TTA TCA AAA AC
10.T62R_F	Forward Primer	CGC CTG CGC CAG CTG ACG CGC CT
10.T62R_R	Reverse Primer	CAG CTG GCG CAG GCG GTC GAA AAC G
11.T86F_F	Forward Primer	ATA AAC TGT TTC AGC TGA CCC AAC TGA GTC
11.T86F_R	Reverse Primer	CAG CTG AAA CAG TTT ATC AAA AAC GCC AGC C
12.Y146E_F	Forward Primer	TTC GGT GAA CTG AAC CTG GAC CCG G
12.Y146E_R	Reverse Primer	GGT TCA GTT CAC CGA ATA CAA GCC CAG G
Round 3 Mutagenesis Primer
1.C17W_F	Forward Primer	TGT AGC TGG AGC GGG ACA ACC GTC G
1.C17W_R	Reverse Primer	CCC GCT CCA GCT ACA CTG CGA AGG GCA
2.K52V_F	Forward Primer	ATC ACA GTG CTG GAA CCA GGC GTT TTC G
2.K52V_R	Reverse Primer	TTC CAG CAC TGT GAT TTG ATT GTC GTA CAG ATA CAG C
3.D59K_F	Forward Primer	CGT TTT CAA ACG CCT GAC CCA GCT GAC G
3.D59K_R	Reverse Primer	CAG GCG TTT GAA AAC GCC TGG TTC CAG C
4.D59Y_F	Forward Primer	GTT TTC TAT CGC CTG ACC CAG CTG ACG
4.D59Y_R	Reverse Primer	CAG GCG ATA GAA AAC GCC TGG TTC CAG C
5.K75E_F	Forward Primer	TTT GAT GAA CTG ACC CAG CTG ACC CA
5.K75E_R	Reverse Primer	GGT CAG TTC ATC AAA AAC GCC AGC CGG
6.K75C_F	Forward Primer	GTT TTT GAT TGC CTG ACC CAG CTG ACC CA
6.K75C_R	Reverse Primer	GGT CAG GCA ATC AAA AAC GCC AGC CGG
7.K75Q_F	Forward Primer	TTT TGA TCA GCT GAC CCA GCT GAC CCA
7.K75Q_R	Reverse Primer	GCT GGG TCA GCT GAT CAA AAA CGC CAG CCG G
8.K75N_F	Forward Primer	TTT GAT AAC CTG ACC CAG CTG ACC CA
8.K75N_R	Reverse Primer	GGT CAG GTT ATC AAA AAC GCC AGC CGG
9.K110D_F	Forward Primer	AAT CTG GAT TCC CTG ACC CAT ATC TGG CTT CTG AAT AAT CCG
9.110D_R	Reverse Primer	TCA GGG AAT CCA GAT TAT CGA ATG CGC CGC GCG
10.H114G_F	Forward Primer	CTG ACC GGC ATC TGG CTT CTG AAT AAT CCG TGG
10.H114G_R	Reverse Primer	GCC AGA TGC CGG TCA GGG ATT TCA GAT TAT CGA ATG C
11.D128K_F	Forward Primer	GTG CTC TAA AAT TCT GTA TCT GTC GCG CTG G
11.D128K_R	Reverse Primer	CAG AAT TTT AGA GCA CGC GCA GTC C
12.N148C_F	Forward Primer	TAT CTG TGC CTG GAC CCG GAT AGT GCC
12.N148C_R	Reverse Primer	GTC CAG GCA CAG ATA ACC GAA TAC AAG CCC AGG
Round 4 Mutagenesis Primer
1.R5D_F	Forward Primer	CGT ATC GAC GCG CGC GGT AGC G
1.R5D_R	Reverse Primer	GCG CGC GTC GAT ACG GGC CAT GGT ATA TCT CC
2.R5N_F	Forward Primer	CGT ATC AAC GCG CGC GGT AGC G
2.R5N_R	Reverse Primer	GCG CGC GTT GAT ACG GGC CAT GGT ATA TCT CC
3.A6C_F	Forward Primer	ATC CGC TGC CGC GGT AGC GCG T
3.A6C_R	Reverse Primer	ACC GCG GCA GCG GAT ACG GGC CAT G
4.R7D_F	Forward Primer	CCG CGC GGA TGG TAG CGC GTG CCC
4.R7D_R	Reverse Primer	GCT ACC ATC CGC GCG GAT ACG GG
5.G26K_F	Forward Primer	TGT AGC AAA AAG AGC CTG GCG AGC
5.G26K_R	Reverse Primer	GCT CTT TTT GCT ACA ATC GAC GGT TGT CC
6.S28K_F	Forward Primer	GGA AAG AAA CTG GCG AGC GTC CC
6.S28K_R	Reverse Primer	CGC CAG TTT CTT TCC GCT ACA ATC GAC G
7.V42W_F	Forward Primer	ACG CAG TGG CTG TAT CTG TAC GAC AAT CAA ATC AC
7.V42W_R	Reverse Primer	ATA CAG CCA CTG CGT TGT GGT CGG AAT
8.F82A_F	Forward Primer	GGC GTT GCG GAT AAA CTG ACC CAG CTG ACC
8.F82A_R	Reverse Primer	AGT TTA TCC GCA ACG CCA GCC GGA AG
9.H114W_F	Forward Primer	CTG ACC TGG ATC TGG CTT CTG AAT AAT CCG T
9.H114W_R	Reverse Primer	CCA GAT CCA GGT CAG GGA TTT CAG ATT ATC GAA T
10.H114A_F	Forward Primer	CTG ACC GCG ATC TGG CTT CTG AAT AAT CCG T
10.H114A_R	Reverse Primer	CCA GAT CGC GGT CAG GGA TTT CAG ATT ATC GAA T
11.H139Y_F	Forward Primer	TCA CAG TAT CCT GGG CTT GTA TTC GGT T
11.H139Y_R	Reverse Primer	CCC AGG ATA CTG TGA GAT CCA GCG CG
12.H139S_F	Forward Primer	TCA CAG AGC CCT GGG CTT GTA TTC GGT T
12.H139S_R	Reverse Primer	CCC AGG GCT CTG TGA GAT CCA GCG CG
Round 5 Mutagenesis Primer
1.A6Y_F	Forward Primer	ATC CGC TAT CGC GGT AGC GCG T
1.A6Y_R	Reverse Primer	ACC GCG ATA GCG GAT ACG GGC CAT G
2.A6N_F	Forward Primer	ATC CGC AAC CGC GGT AGC GCG T
2.A6N_R	Reverse Primer	ACC GCG GTT GCG GAT ACG GGC CAT G
3.A6I_F	Forward Primer	ATC CGC ATT CGC GGT AGC GCG T
3.A6I_R	Reverse Primer	ACC GCG AAT GCG GAT ACG GGC CAT G
4.R7I_F	Forward Primer	CCG CGC GAT TGG TAG CGC GTG CCC
4.R7I_R	Reverse Primer	GCT ACC AAT CGC GCG GAT ACG GG
5.S28H_F	Forward Primer	CGG AAA GCA TCT GGC GAG CGT CCC
5.S28H_R	Reverse Primer	CGC CAG ATG CTT TCC GCT ACA ATC GAC GG
6.T65H_F	Forward Primer	CAG CTG CAT CGC CTG GAC CTT GAC AAT
6.T65H_R	Reverse Primer	CAG GCG ATG CAG CTG GGT CAG GCG
7.P78Y_F	Forward Primer	CGT TCT TTA TGC TGG CGT TTT TGA TAA ACT GAC C
7.P78Y_R	Reverse Primer	GCC AGC ATA AAG AAC GGT AAG CTG GTT ATT GTC
8.P78N_F	Forward Primer	CGT TCT TAA CGC TGG CGT TTT TGA TAA ACT GAC C
8.P78N_R	Reverse Primer	GCC AGC GTT AAG AAC GGT AAG CTG GTT ATT GTC
9.P78D_F	Forward Primer	CGT TCT TGA TGC TGG CGT TTT TGA TAA ACT GAC C
9.P78D_R	Reverse Primer	GCC AGC ATC AAG AAC GGT AAG CTG GTT ATT GTC
10.P78K_F	Forward Primer	CGT TCT TAA AGC TGG CGT TTT TGA TAA ACT GAC C
10.P78K_R	Reverse Primer	GCC AGC TTT AAG AAC GGT AAG CTG GTT ATT GTC
11.T89H_F	Forward Primer	CCA GCT GCA TCA ACT GAG TCT GAA CGA CAA CC
11.T89H_R	Reverse Primer	CAG TTG ATG CAG CTG GGT CAG TTT ATC AAA AAC G
12.G141W_F	Forward Primer	CAC CCT TGG CTT GTA TTC GGT TAT CTG AAC CTG G
12.G141W_R	Reverse Primer	TAC AAG CCA AGG GTG CTG TGA GAT CCA G
13.L149C_F	Forward Primer	CTG AAC TGC GAC CCG GAT AGT GCC CG
13.L149C_R	Reverse Primer	CGG GTC GCA GTT CAG ATA ACC GAA TAC AAG CCC A
14.P151H_F	Forward Primer	CTG GAC CAT GAT AGT GCC CGC TGT TCG
14.P151H_R	Reverse Primer	ACT ATC ATG GTC CAG GTT CAG ATA ACC GAA TAC

## Sheet: Mutagenesis_Repe_Primer
Gene	Direction	Sequence
Insert Primer
Repebody	Forward Primer	TTAAGAAGGAGATATACCATGACAATTACGGTGTCTACCCCGATTAAG
Repebody	Reverse Primer	GTGATGATGATGATGATGCCCCGGGCACTTACTC
Vector Primer
pET28a_V_F	Forward Primer	CATCATCATCATCATCACTGAGTTGGCTGCTGCCAC
pET28a_V_R	Reverse Primer	GGTATATCTCCTTCTTAAAGTTAAACAAAATTATTTCTAGAGGGG
AiCE Primer
1.T21V_F	Forward Primer	GCGGAAgtgATTAAGGCCAATTTGAAAAAAAAATCTGTAAC
1.T21V_R	Reverse Primer	GCCTTAATcacTTCCGCGAAGGCATCG
2.Q182N_F	Forward Primer	ATTAACCaacTTAAAACAGTTAAGCCTGAACGATAATCAG
2.Q182N_R	Reverse Primer	GTTTTAAgttGGTTAATTTGTCAAAGACGCCT
Round 1 Mutagenesis Primer
1.T7W_F	Forward Primer	GTGTCTtggCCGATTAAGCAGATTTTCCCT
1.T7W_R	Reverse Primer	AATCGGccaAGACACCGTAATTGTCATGGTAT
2.A19F_F	Forward Primer	GCCTTCttgGAAACCATTAAGGCCAATTTGAAAAA
2.A19F_R	Reverse Primer	GGTTTCcaaGAAGGCATCGTCAGGGAAA
3.N25T_F	Forward Primer	AAGGCCaccTTGAAAAAAAAATCTGTAACCGACGC
3.N25T_R	Reverse Primer	TTTCAAggtGGCCTTAATGGTTTCCGC
4.N95C_F	Forward Primer	ACAGGGtgcCAGCTGCAGTCGCTTCC
4.N95C_R	Reverse Primer	CAGCTGgcaCCCTGTCAGAATCAGGTACG
5.E118T_F	Forward Primer	CTGGTGaccAACCAGCTGCAATCACTGC
5.E118T_R	Reverse Primer	CTGGTTggtCACCAGAACCAGCTCTTTCAG
6.Q122F_F	Forward Primer	CAGCTGtttTCACTGCCGGACGGC
6.Q122F_R	Reverse Primer	CAGTGAaaaCAGCTGGTTTTCCACCAG
7.F177W_F	Forward Primer	GGCGTCtggGACAAATTAACCCAGTTAAAACAGTTAAG
7.F177W_R	Reverse Primer	TTTGTCccaGACGCCTTCCGGCAAACTTT
8.S195H_F	Forward Primer	GCTTAAAcacGTACCGGATGGGGTCTTT
8.S195H_R	Reverse Primer	CGGTACgtgTTTAAGCTGATTATCGTTCAGGC
9.D218Y_F	Forward Primer	CCCTGGtatTGTGCGTGTAGTGACATCTTG
9.D218Y_R	Reverse Primer	CGCACAataCCAGGGGTTATTCAGCAGC
10.C219L_F	Forward Primer	TGGGATcctGCGTGTAGTGACATCTTGTATCT
10.C219F_R	Reverse Primer	ACACGCaggATCCCAGGGGTTATTCAGCA
11.P246V_F	Forward Primer	CTTGATgtgGACTCGGCTCGCTGT
11.P246V_R	Reverse Primer	CGAGTCcacATCAAGGTTAAGATAGCCGAACAC
12.S265C_F	Forward Primer	GAGGCGtgcACCAGCCCGAGTAAGTG
12.S265C_R	Reverse Primer	GCTGGTgcaCGCCTCGGTCACTGC
Round 2 Mutagenesis Primer
1.C219S_F	Forward Primer	TGGGATagcGCGTGTAGTGACATCTTGTATCT
1.C219S_R	Reverse Primer	ACACGCgctATCCCAGGGGTTATTCAGCA
2.C219E_F	Forward Primer	TGGGATgaaGCGTGTAGTGACATCTTGTATCT
2.C219E_R	Reverse Primer	ACACGCttcATCCCAGGGGTTATTCAGCA
3.C221D_F	Forward Primer	TGTGCGgatAGTGACATCTTGTATCTGAGTCGT
3.C221D_R	Reverse Primer	GTCACTatcCGCACAATCCCAGGGG
4.C219P_F	Forward Primer	CTGGGATccgGCGTGTAGTGACATCTTGTATCT
4.C219P_R	Reverse Primer	ACACGCcggATCCCAGGGGTTATTCAGCA
5.C219V_F	Forward Primer	TGGGATgtgGCGTGTAGTGACATCTTGTATCT
5.C219V_R	Reverse Primer	ACACGCcacATCCCAGGGGTTATTCAGCA
6.C219I_F	Forward Primer	TGGGATattGCGTGTAGTGACATCTTGTATCT
6.C219I_R	Reverse Primer	ACACGCaatATCCCAGGGGTTATTCAGCA
7.C221P_F	Forward Primer	TGTGCGccgAGTGACATCTTGTATCTGAGTCGT
7.C221P_R	Reverse Primer	GTCACTcggCGCACAATCCCAGGGG
8.C221A_F	Forward Primer	TGTGCGgcgAGTGACATCTTGTATCTGAGTCGT
8.C221A_R	Reverse Primer	GTCACTcgcCGCACAATCCCAGGGG
9.C221E_F	Forward Primer	TGTGCGgaaAGTGACATCTTGTATCTGAGTCGT
9.C221E_R	Reverse Primer	GTCACTttcCGCACAATCCCAGGGG
10.C221G_F	Forward Primer	TGTGCGggcAGTGACATCTTGTATCTGAGTCGT
10.C221G_R	Reverse Primer	GTCACTgccCGCACAATCCCAGGGG
11.C221Q_F	Forward Primer	TGTGCGcagAGTGACATCTTGTATCTGAGTCGT
11.C221Q_R	Reverse Primer	GTCACTctgCGCACAATCCCAGGGG
12.C219G_F	Forward Primer	TGGGATggcGCGTGTAGTGACATCTTGTATCT
12.C219G_R	Reverse Primer	ACACGCgccATCCCAGGGGTTATTCAGCA
Round 3 Mutagenesis Primer
1.I22D_F	Forward Primer	GAAACCgatAAGGCCAATTTGAAAAAAAAATCTGT
1.I22D_R	Reverse Primer	GGCCTTatcGGTTTCCGCGAAGGCA
2.H76S_F	Forward Primer	AATAAATTGagcGATATTTCAGCACTTAAAGAACTGACCA
2.H76S_R	Reverse Primer	GAAATATCgctCAATTTATTGCCTCCCAGGGC
3.H76N_F	Forward Primer	ATAAATTGaacGATATTTCAGCACTTAAAGAACTGACCA
3.H76N_R	Reverse Primer	AATATCgttCAATTTATTGCCTCCCAGGGC
4.H76A_F	Forward Primer	AATAAATTGgcgGATATTTCAGCACTTAAAGAACTGACCA
4.H76A_R	Reverse Primer	GAAATATCcgcCAATTTATTGCCTCCCAGGGC
5.C219A_F	Forward Primer	TGGGATgcgGCGTGTAGTGACATCTTGTATCT
5.C219A_R	Reverse Primer	ACACGCggtATCCCAGGGGTTATTCAGCA
6.C219T_F	Forward Primer	TGGGATACCGCGTGTAGTGACATCTTGTATCT
6.C219T_R	Reverse Primer	ACACGCGGTATCCCAGGGGTTATTCAGCA
7.C219V_F	Forward Primer	TGGGATGTGGCGTGTAGTGACATCTTGTATCT
7.C219V_R	Reverse Primer	ACACGCcacATCCCAGGGGTTATTCAGCA
8.C219M_F	Forward Primer	TGGGATatgGCGTGTAGTGACATCTTGTATCT
8.C219M_R	Reverse Primer	ACACGCcatATCCCAGGGGTTATTCAGCA
9.C219N_F	Forward Primer	TGGGATaacGCGTGTAGTGACATCTTGTATCT
9.C219N_R	Reverse Primer	ACACGCgttATCCCAGGGGTTATTCAGCA
10.C219D_F	Forward Primer	TGGGATgatGCGTGTAGTGACATCTTGTATCT
10.C219D_R	Reverse Primer	ACACGCatcATCCCAGGGGTTATTCAGCA
11.C219K_F	Forward Primer	TGGGATaaaGCGTGTAGTGACATCTTGTATCT
11.C219K_R	Reverse Primer	ACACGCtttATCCCAGGGGTTATTCAGCA
12.F13A_F	Forward Primer	GCAGATTgcgCCTGACGATGCCTTCGC
12.F13A_R	Reverse Primer	GTCAGGcgcAATCTGCTTAATCGGGGTAGAC
Round 4 Mutagenesis Primer
1.E39K_F	Forward Primer	ACAGAATaaaTTGAATAGCATTGATCAGATTATCGCC
1.E39K_R	Reverse Primer	ATTCAAtttATTCTGTGTTACGGCGTCG
2.D106R_F	Forward Primer	CGTATTTcgcAAGCTGACGAATCTGAAAGAGC
2.D106R_R	Reverse Primer	CAGCTTgcgAAATACGCCATTCGGAAGC
3.D130R_F	Forward Primer	GTGTTTcgcAAATTAACGAACTTGACCTATTTATATCTGTAC
3.D130R_R	Reverse Primer	GTTAATTTgcgAAACACGCCGTCCGG
4.P235C_F	Forward Primer	CCAGCATtgcGGCCTTGTGTTCGGCT
4.P235C_R	Reverse Primer	AAGGCCgcaATGCTGGCTAATCCAACGAC
5.V238C_F	Forward Primer	GGCCTTtgcTTCGGCTATCTTAACCTTGATCCG
5.V238C_R	Reverse Primer	GCCGAAgcaAAGGCCAGGATGCTGG
6.F239C_F	Forward Primer	CTTGTGtgcGGCTATCTTAACCTTGATCCGGA
6.F239C_R	Reverse Primer	ATAGCCgcaCACAAGGCCAGGATGCT
7.S248C_F	Forward Primer	CCGGACtgcGCTCGCTGTAGCGGCA
7.S248C_R	Reverse Primer	GCGAGCgcaGTCCGGATCAAGGTTAAGATAGC
8.C251K_F	Forward Primer	GCTCGCaaaAGCGGCACGAACACTC
8.C251K_R	Reverse Primer	GCCGCTtttGCGAGCCGAGTCCG
9.C251A_F	Forward Primer	GCTCGCgcgAGCGGCACGAACACTC
9.C251A_R	Reverse Primer	GCCGCTcgcGCGAGCCGAGTCCG
10.T254C_F	Forward Primer	AGCGGCtgcAACACTCCTGTTCGTGCAG
10.T254C_R	Reverse Primer	GAGTGTTgcaGCCGCTACAGCGAGC
11.P257C_F	Forward Primer	GAACACTtgcGTTCGTGCAGTGACCGAG
11.P257C_R	Reverse Primer	ACGAACgcaAGTGTTCGTGCCGCTAC
12.L237C_F	Forward Primer	CCTGGCtgcGTGTTCGGCTATCTTAACCTTGAT
12.L237_R	Reverse Primer	GAACACgcaGCCAGGATGCTGGCTAAT
Round 5 Mutagenesis Primer
1.D77R_F	Forward Primer	ATTGCATcgcATTTCAGCACTTAAAGAACTGACCAAT
1.D77R_R	Reverse Primer	GCTGAAATgcgATGCAATTTATTGCCTCCCAGG
2.E83R_F	Forward Primer	GCACTTAAAcgcCTGACCAATTTAACGTACCTGATTCT
2.E83R_R	Reverse Primer	GGTCAGgcgTTTAAGTGCTGAAATATCATGCAATTTATTGC
3.N102R_F	Forward Primer	GCTTCCGcgcGGCGTATTTGACAAGCTGACG
3.N102R_R	Reverse Primer	TACGCCgcgCGGAAGCGACTGCAGC
4.D126R_F	Forward Primer	CTGCCGcgcGGCGTGTTTGACAAATTAACGAAC
4.D126R_R	Reverse Primer	CACGCCgcgCGGCAGTGATTGCAGCT
5.E174R_F	Forward Primer	TTGCCGcgcGGCGTCTTTGACAAATTAACCCA
5.E174R_R	Reverse Primer	GACGCCgcgCGGCAAACTTTGCAGCTG
6.C219Y_F	Forward Primer	TGGGATtatGCGTGTAGTGACATCTTGTATCT
6.C219Y_R	Reverse Primer	ACACGCataATCCCAGGGGTTATTCAGCAG
7.C251R_F	Forward Primer	GCTCGCcgcAGCGGCACGAACACTC
7.C251R_R	Reverse Primer	GCCGCTgcgGCGAGCCGAGTCCG
8.C251A_F	Forward Primer	GCTCGCgcgAGCGGCACGAACACTC
8.C251A_R	Reverse Primer	GCCGCTcgcGCGAGCCGAGTCCG
9.C251T_F	Forward Primer	GCTCGCaccAGCGGCACGAACACTC
9.C251T_R	Reverse Primer	GCCGCTggtGCGAGCCGAGTCCG
10.C251P_F	Forward Primer	GCTCGCccgAGCGGCACGAACACTC
10.C251P_R	Reverse Primer	GCCGCTcggGCGAGCCGAGTCCG
11.C251S_F	Forward Primer	GCTCGCagcAGCGGCACGAACACTC
11.C251S_R	Reverse Primer	GCCGCTgctGCGAGCCGAGTCCG
12.C251L_F	Forward Primer	GCTCGCctgAGCGGCACGAACACTC
12.C251L_R	Reverse Primer	GCCGCTcagGCGAGCCGAGTCCG
